# Supplementary material for: Optogenetic manipulation of neuronal and cardiomyocyte functions in zebrafish using microbial rhodopsins and adenylyl cyclases
Source: eLife. 2023 Aug 17;12:e83975. doi: 10.7554/eLife.83975 (PMC10435232; doi:10.7554/eLife.83975)
Supplement: Figure 1—figure supplement 1—source data 1. [file elife-83975-fig1-figsupp1-data1.xlsx]

## Sheet: Sheet1
GtCCR4-3.0						CrChR2(T159C)						CoChR						ChrimsonR
	Ip		Iss				Ip		Iss				Ip		Iss				Ip		Iss
mW/mm2	ave	SEM	ave	SEM		mW/mm2	ave	SEM	ave	SEM		mW/mm2	ave	SEM	ave	SEM		mW/mm2	ave	SEM	ave	SEM
0	13.9134	2.11259	0.941235	0.343279		0	23.8175	11.8809	4.93094	4.55366		0	13.4937	3.25961	0.418973	0.115261		0	12.4865	0.795837	0.668074	0.239017
0.0111558	219.009	43.3147	200.182	40.4325		0.0105053	262.858	111.059	240.201	106.543		0.0105053	602.346	239.043	515.137	171.175		0.119513	115.499	32.725	104.366	32.7386
0.0154413	287.4	57.2983	266.506	53.9737		0.0225276	466.535	202.363	408.507	183.799		0.0225276	953.2	307.591	788.947	198.036		0.172089	158.467	44.7854	144.556	44.7241
0.0232209	402.786	79.4781	378.122	75.953		0.034357	615.289	259.021	520.987	220.802		0.034357	1182.05	339.6	948.611	198.648		0.228204	191.524	58.0122	175.269	54.7517
0.0307458	504.059	99.6691	474.296	95.7899		0.0435848	708.694	288.448	580.509	237.348		0.0435848	1311.31	351.939	1027.11	192.045		0.287891	221.658	65.464	200.513	60.0543
0.0384805	597.832	118.733	560.925	113.267		0.0555438	821.474	322.717	644.656	254.872		0.0555438	1452.7	359.392	1113.91	182.983		0.342994	244.74	72.1843	219.215	65.3966
0.045987	675.329	134.44	632.42	128.133		0.0666142	904.95	347.814	684.087	264.735		0.0666142	1543.27	360.827	1167.9	177.582		0.400923	263.46	78.0053	235.305	69.1754
0.0535921	740.288	147.249	693.375	139.771		0.0765635	958.776	367.321	700.066	272.624		0.0765635	1629.04	359.322	1217.54	170.828		0.458357	278.064	82.9895	247.949	71.9629
0.0611438	794.594	158.921	738.936	149.531		0.087443	1027.7	382.473	730.565	273.93		0.087443	1715	359.995	1267.12	169.835		0.515718	290.727	85.4701	257.278	74.3598
0.068726	835.668	167.292	776.863	157.515		0.0978451	1083.6	394.943	748.45	275.268		0.0978451	1780.63	358.535	1302.91	167.348		0.573568	302.833	88.3768	267.759	75.0509
0.0761912	873.048	174.475	808.616	163.786		0.109114	1135.14	408.474	758.931	276.864		0.109114	1829.8	358.91	1323.2	164.503		0.628318	311.324	90.6254	273.481	76.5572
0.0836824	897.574	178.14	827.893	166.965		0.118625	1168.78	414.738	765.783	276.075		0.118625	1864.31	355.87	1340.82	163.023		0.684899	319.272	90.2047	279.161	76.1224
0.0912539	916.144	182.843	844.762	171.148		0.128743	1201.31	420.963	769.683	273.554		0.128743	1906.09	350.308	1359.68	155.305		0.741815	329.949	92.0819	286.29	76.9083
0.0987639	933.717	186.55	857.246	173.241		0.139809	1235.6	425.212	774.137	271.039		0.139809	1931.25	347.684	1368.46	152.776		0.798784	332.515	93.8405	289.77	77.3332
0.106229	945.215	188.192	867.501	175.339		0.148627	1260.9	431.485	773.707	270.262		0.148627	1948.43	345.424	1371.27	150.936		0.85589	338.89	93.7473	292.413	76.6708
0.113618	955.73	191.951	875.983	178.703		0.158563	1284.1	435.627	771.644	268.187		0.158563	1969.28	346.549	1376.89	150.722		0.913053	346.519	96.4283	298.784	78.0025
0.121145	961.058	194.866	879.954	181.421		0.169174	1303.45	440.866	771.291	268.162		0.169174	1992.59	344.479	1385.11	149.264		0.96743	350.399	96.7365	301.525	78.367
0.128277	964.206	195.88	882.216	181.942		0.178774	1315.09	444.31	766.045	267.065		0.178774	1996.02	346.921	1379.93	151.975		1.02645	354.545	96.7647	303.854	78.4363
0.135788	972.344	199.058	885.885	184.002		0.189112	1337.91	450.728	771.026	266.387		0.189112	2001.98	346.489	1376.47	154.209		1.08132	356.87	96.9085	306.366	78.0012
0.143211	973.502	199.621	888.193	184.891		0.198565	1354.09	452.495	768.793	264.67		0.198565	2010.05	344.637	1377.73	152.511		1.14013	361.624	98.1492	309.829	78.6382
0.150572	975.138	199.739	890.269	185.912		0.208725	1372.49	453.809	769.518	263.845		0.208725	2030.34	342.683	1384.57	152.372
