# Supplementary material for: Optogenetic manipulation of neuronal and cardiomyocyte functions in zebrafish using microbial rhodopsins and adenylyl cyclases
Source: eLife. 2023 Aug 17;12:e83975. doi: 10.7554/eLife.83975 (PMC10435232; doi:10.7554/eLife.83975)
Supplement: Figure 1—source data 1. [file elife-83975-fig1-data1.xlsx]

## Sheet: B
Name	Group	Value
GtCCR4-3.0-EYFP	Ip	21.9026
GtCCR4-3.0-EYFP	Ip	152.667
GtCCR4-3.0-EYFP	Ip	137.692
GtCCR4-3.0-EYFP	Ip	23.2843
GtCCR4-3.0-EYFP	Ip	16.6515
GtCCR4-3.0-EYFP	Ip	26.0495
GtCCR4-3.0-EYFP	Ip	67.9385
GtCCR4-3.0-EYFP	Ip	19.6526
GtCCR4-3.0-EYFP	Ip	54.7989
GtCCR4-3.0-EYFP	Iss	17.5032
GtCCR4-3.0-EYFP	Iss	132.108
GtCCR4-3.0-EYFP	Iss	120.207
GtCCR4-3.0-EYFP	Iss	17.7036
GtCCR4-3.0-EYFP	Iss	12.6634
GtCCR4-3.0-EYFP	Iss	20.3063
GtCCR4-3.0-EYFP	Iss	60.8486
GtCCR4-3.0-EYFP	Iss	16.5235
GtCCR4-3.0-EYFP	Iss	48.2915
GtCCR4-MT	Ip	118.14
GtCCR4-MT	Ip	49.228
GtCCR4-MT	Ip	74.3408
GtCCR4-MT	Ip	107.603
GtCCR4-MT	Ip	20.0392
GtCCR4-MT	Ip	28.7663
GtCCR4-MT	Ip	14.2672
GtCCR4-MT	Ip	14.0632
GtCCR4-MT	Ip	83.0523
GtCCR4-MT	Iss	107.031
GtCCR4-MT	Iss	42.3363
GtCCR4-MT	Iss	62.8713
GtCCR4-MT	Iss	92.4673
GtCCR4-MT	Iss	14.9106
GtCCR4-MT	Iss	23.4587
GtCCR4-MT	Iss	10.7018
GtCCR4-MT	Iss	11.7969
GtCCR4-MT	Iss	74.2455
CrChR2[T159C]-mCherry	Ip	34.9548
CrChR2[T159C]-mCherry	Ip	62.3938
CrChR2[T159C]-mCherry	Ip	62.8891
CrChR2[T159C]-mCherry	Ip	33.9215
CrChR2[T159C]-mCherry	Ip	42.0063
CrChR2[T159C]-mCherry	Ip	109.315
CrChR2[T159C]-mCherry	Iss	20.6251
CrChR2[T159C]-mCherry	Iss	30.6625
CrChR2[T159C]-mCherry	Iss	34.4662
CrChR2[T159C]-mCherry	Iss	15.6497
CrChR2[T159C]-mCherry	Iss	20.1728
CrChR2[T159C]-mCherry	Iss	59.1322
CoChR-tdTomato	Ip	179.05
CoChR-tdTomato	Ip	207.706
CoChR-tdTomato	Ip	115.762
CoChR-tdTomato	Ip	99.2239
CoChR-tdTomato	Ip	46.1384
CoChR-tdTomato	Ip	153.791
CoChR-tdTomato	Iss	113.741
CoChR-tdTomato	Iss	126.777
CoChR-tdTomato	Iss	71.0482
CoChR-tdTomato	Iss	72.1946
CoChR-tdTomato	Iss	28.5514
CoChR-tdTomato	Iss	105.375
ChrimsonR-tdTomato	Ip	7.2488
ChrimsonR-tdTomato	Ip	15.4878
ChrimsonR-tdTomato	Ip	36.5984
ChrimsonR-tdTomato	Ip	24.3111
ChrimsonR-tdTomato	Ip	3.80249
ChrimsonR-tdTomato	Ip	17.6415
ChrimsonR-tdTomato	Iss	6.25982
ChrimsonR-tdTomato	Iss	14.424
ChrimsonR-tdTomato	Iss	29.7305
ChrimsonR-tdTomato	Iss	21.5846
ChrimsonR-tdTomato	Iss	3.57097
ChrimsonR-tdTomato	Iss	15.4003

## Sheet: C
Name	Group	Value
GtCCR4-3.0-EYFP	ms	38.9413
GtCCR4-3.0-EYFP	ms	49.4079
GtCCR4-3.0-EYFP	ms	53.9915
GtCCR4-3.0-EYFP	ms	35.1628
GtCCR4-3.0-EYFP	ms	38.1762
GtCCR4-3.0-EYFP	ms	36.7874
GtCCR4-3.0-EYFP	ms	28.9453
GtCCR4-3.0-EYFP	ms	27.9867
GtCCR4-3.0-EYFP	ms	33.7877
GtCCR4-MT	ms	54.5238
GtCCR4-MT	ms	44.1848
GtCCR4-MT	ms	75.3421
GtCCR4-MT	ms	45.0018
GtCCR4-MT	ms	43.7317
GtCCR4-MT	ms	55.2027
GtCCR4-MT	ms	31.9346
GtCCR4-MT	ms	28.3292
GtCCR4-MT	ms	26.3991
CrChR2[T159C]-mCherry	ms	57.6712
CrChR2[T159C]-mCherry	ms	36.1747
CrChR2[T159C]-mCherry	ms	49.4517
CrChR2[T159C]-mCherry	ms	29.6048
CrChR2[T159C]-mCherry	ms	38.1842
CrChR2[T159C]-mCherry	ms	42.779
CoChR-tdTomato	ms	29.8701
CoChR-tdTomato	ms	23.4697
CoChR-tdTomato	ms	34.2507
CoChR-tdTomato	ms	29.257
CoChR-tdTomato	ms	23.9526
CoChR-tdTomato	ms	51.4288
ChrimsonR-tdTomato	ms	18.7836
ChrimsonR-tdTomato	ms	13.9592
ChrimsonR-tdTomato	ms	15.839
ChrimsonR-tdTomato	ms	13.2432
ChrimsonR-tdTomato	ms	12.5967
ChrimsonR-tdTomato	ms	15.5636

## Sheet: D
	Iss
	ave				SEM
nm	GtCCR4-3.0	ChR2(T159C)	CoChR	ChrimsonR	GtCCR4-3.0	ChR2(T159C)	CoChR	ChrimsonR
385	0.234223	0.798704	0.792956	0.17415	0.0197873	0.035727	0.0405149	0.0383638
423	0.362303	0.974345	0.950222	0.264573	0.0141139	0.0154018	0.0168804	0.0180115
469	0.788386	0.9806	0.987117	0.466236	0.0531113	0.0110861	0.00798829	0.0279905
511	0.96114	0.772096	0.907155	0.756588	0.03886	0.0211937	0.0630954	0.0241875
555	0.787194	0.218986	0.363047	0.965708	0.0355534	0.0220208	0.0443561	0.0198832
590	0.282141	0.0110803	0.0248369	0.948821	0.0187828	0.00142765	0.00202109	0.021138
631	0.0427905	0.00026538	0.00275119	0.66249	0.00796916	0.000803071	0.000965901	0.0428905

## Sheet: E
Name	Group	Value
GtCCR4-3.0-EYFP	Ip	0.034061
GtCCR4-3.0-EYFP	Ip	0.037021
GtCCR4-3.0-EYFP	Ip	0.035065
GtCCR4-3.0-EYFP	Ip	0.045757
GtCCR4-3.0-EYFP	Ip	0.033097
GtCCR4-3.0-EYFP	Ip	0.033003
GtCCR4-3.0-EYFP	Iss	0.026058
GtCCR4-3.0-EYFP	Iss	0.034056
GtCCR4-3.0-EYFP	Iss	0.029417
GtCCR4-3.0-EYFP	Iss	0.037516
GtCCR4-3.0-EYFP	Iss	0.030737
GtCCR4-3.0-EYFP	Iss	0.03111
CrChR2[T159C]-mCherry	Ip	0.11284
CrChR2[T159C]-mCherry	Ip	0.044483
CrChR2[T159C]-mCherry	Ip	0.10138
CrChR2[T159C]-mCherry	Ip	0.14836
CrChR2[T159C]-mCherry	Ip	0.046015
CrChR2[T159C]-mCherry	Iss	0.034201
CrChR2[T159C]-mCherry	Iss	0.017877
CrChR2[T159C]-mCherry	Iss	0.031994
CrChR2[T159C]-mCherry	Iss	0.040744
CrChR2[T159C]-mCherry	Iss	0.026615
CoChR-tdTomato	Ip	0.07162
CoChR-tdTomato	Ip	0.01124
CoChR-tdTomato	Ip	0.04961
CoChR-tdTomato	Ip	0.05611
CoChR-tdTomato	Ip	0.06897
CoChR-tdTomato	Ip	0.03451
CoChR-tdTomato	Iss	0.04881
CoChR-tdTomato	Iss	0.003343
CoChR-tdTomato	Iss	0.02719
CoChR-tdTomato	Iss	0.03894
CoChR-tdTomato	Iss	0.04927
CoChR-tdTomato	Iss	0.01939
ChrimsonR-tdTomato	Ip	0.2698
ChrimsonR-tdTomato	Ip	0.3627
ChrimsonR-tdTomato	Ip	0.2612
ChrimsonR-tdTomato	Ip	0.3982
ChrimsonR-tdTomato	Ip	0.4267
ChrimsonR-tdTomato	Ip	0.3609
ChrimsonR-tdTomato	Iss	0.3351
ChrimsonR-tdTomato	Iss	0.4609
ChrimsonR-tdTomato	Iss	0.1866
ChrimsonR-tdTomato	Iss	0.3214
ChrimsonR-tdTomato	Iss	0.4859
ChrimsonR-tdTomato	Iss	0.2898
