# Supplementary material for: Optogenetic manipulation of neuronal and cardiomyocyte functions in zebrafish using microbial rhodopsins and adenylyl cyclases
Source: eLife. 2023 Aug 17;12:e83975. doi: 10.7554/eLife.83975 (PMC10435232; doi:10.7554/eLife.83975)
Supplement: Figure 2—source data 1. [file elife-83975-fig2-data1.xlsx]

## Sheet: D
	GtCCR4-3.0-EYFP			GtCCR4-MT			KnChR-3.0-EYFP			CrChR2[T159C]-mcherry			CoChR-tdTomato			ChrimsonR-tdTomato
	time	position		time	position		time	position		time	position		time	position		time	position
	-0.996063	0.00754715		-0.996146	-0.00426224		-0.996042	0.0559009		-0.996083	-0.000604526		-0.995502	-3.78009e-16		-0.996021	0.00109839
	-0.981042	0.00754715		-0.981083	-0.00426224		-0.981062	0.0559009		-0.981042	-0.000604526		-0.98051	-3.78009e-16		-0.981062	0.00109839
	-0.966146	0.00754715		-0.966063	-0.00426224		-0.966125	0.0559009		-0.966083	-0.000604526		-0.965518	-3.78009e-16		-0.966063	0.0168982
	-0.951167	0.00754715		-0.951208	-0.00426224		-0.951104	0.0559009		-0.951146	-0.000604526		-0.950525	-3.78009e-16		-0.951	0.0168982
	-0.936125	0.00754715		-0.93625	-0.00426224		-0.936125	0.0559009		-0.936146	-0.000604526		-0.935532	-3.78009e-16		-0.936104	0.0168982
	-0.921146	0.00754715		-0.921167	-0.00426224		-0.921208	0.0559009		-0.921208	-0.000604526		-0.92054	-3.78009e-16		-0.921167	0.0168982
	-0.906146	0.00754715		-0.906271	-0.00426224		-0.906208	0.0559009		-0.906062	-0.000604526		-0.905547	-3.78009e-16		-0.906083	0.0168982
	-0.890833	0.00754715		-0.891312	-0.00426224		-0.891146	0.0559009		-0.891083	-0.000604526		-0.890555	-3.78009e-16		-0.891188	0.0168982
	-0.876125	0.00754715		-0.876208	-0.00426224		-0.876271	0.0559009		-0.876104	-0.000604526		-0.875563	-3.78009e-16		-0.876229	0.0168982
	-0.861208	0.00754715		-0.86125	-0.00426224		-0.861312	0.0559009		-0.861187	-0.000604526		-0.86057	-3.78009e-16		-0.861229	0.0168982
	-0.846188	0.00754715		-0.846271	-0.00426224		-0.846292	0.0559009		-0.846188	-0.000604526		-0.845577	-3.78009e-16		-0.846125	0.0168982
	-0.831104	0.00754715		-0.831354	-0.00426224		-0.831271	0.0559009		-0.83125	-0.000604526		-0.830585	-3.78009e-16		-0.831187	0.0168982
	-0.816292	0.00754715		-0.816271	-0.00426224		-0.816292	0.0559009		-0.816271	-0.000604526		-0.815592	-3.78009e-16		-0.816188	0.0168982
	-0.801333	0.00754715		-0.801375	-0.00426224		-0.801271	0.0559009		-0.80125	-0.000604526		-0.8006	-3.78009e-16		-0.801167	0.0168982
	-0.786292	0.00754715		-0.786375	-0.00426224		-0.786354	0.0559009		-0.786312	-0.000604526		-0.785608	-3.78009e-16		-0.786271	0.0168982
	-0.771354	0.00754715		-0.77125	-0.00426224		-0.771375	0.0559009		-0.771229	-0.000604526		-0.770615	-3.78009e-16		-0.771292	0.0168982
	-0.756375	0.00754715		-0.756417	-0.00426224		-0.756312	0.0559009		-0.756354	-0.000604526		-0.755622	-3.78009e-16		-0.756354	0.0168982
	-0.741313	0.00754715		-0.741417	-0.00426224		-0.741396	0.0559009		-0.741354	-0.000604526		-0.74063	-3.78009e-16		-0.741271	0.0168982
	-0.726396	0.00754715		-0.726417	-0.00426224		-0.726312	0.0559009		-0.726354	-0.000604526		-0.725637	-3.78009e-16		-0.726396	0.0168982
	-0.711313	0.00754715		-0.711479	-0.00426224		-0.711396	0.0559009		-0.711417	-0.000604526		-0.710645	-3.78009e-16		-0.711354	0.0168982
	-0.696417	0.00754715		-0.696333	-0.00426224		-0.696396	0.0559009		-0.696333	-0.000604526		-0.695653	-3.78009e-16		-0.69625	0.0168982
	-0.681333	0.00754715		-0.681479	-0.00426224		-0.681396	0.0559009		-0.681437	-0.000604526		-0.68066	-3.78009e-16		-0.68125	0.0168982
	-0.666417	0.00754715		-0.666438	-0.00426224		-0.666438	0.0559009		-0.666354	-0.000604526		-0.665667	-3.78009e-16		-0.666375	0.0168982
	-0.6515	0.00754715		-0.6515	-0.00426224		-0.651458	0.0559009		-0.651458	-0.000604526		-0.650675	-3.78009e-16		-0.651396	0.0168982
	-0.636437	0.00754715		-0.636562	-0.00426224		-0.636479	0.0559009		-0.636437	-0.000604526		-0.635682	-3.78009e-16		-0.636417	0.0168982
	-0.621479	0.00754715		-0.621604	-0.00426224		-0.621542	0.0559009		-0.621458	-0.000604526		-0.62069	-3.78009e-16		-0.6215	0.0168982
	-0.606458	0.00754715		-0.606604	-0.00426224		-0.606542	0.0559009		-0.6065	-0.000604526		-0.605697	-3.78009e-16		-0.606479	0.0168982
	-0.591438	0.00754715		-0.591562	-0.00426224		-0.591562	0.0559009		-0.5915	-0.000604526		-0.590705	-3.78009e-16		-0.591375	0.0168982
	-0.576458	0.00754715		-0.576583	-0.00426224		-0.576521	0.0559009		-0.576563	-0.000604526		-0.575712	-3.78009e-16		-0.576417	0.0168982
	-0.561583	0.00754715		-0.561583	-0.00426224		-0.561521	0.0559009		-0.561542	-0.000604526		-0.56072	-3.78009e-16		-0.561479	0.0168982
	-0.546479	0.00754715		-0.546583	-0.00426224		-0.5465	0.0559009		-0.546542	-0.000604526		-0.545727	-3.78009e-16		-0.546583	0.0168982
	-0.531583	0.00754715		-0.531667	-0.00426224		-0.531542	0.0559009		-0.531479	-0.000604526		-0.530735	-3.78009e-16		-0.531458	0.0168982
	-0.516583	0.00754715		-0.516667	-0.00426224		-0.516667	0.0559009		-0.516521	-0.000604526		-0.515742	-3.78009e-16		-0.516563	0.0168982
	-0.501625	0.00754715		-0.501646	-0.00426224		-0.501562	0.0559009		-0.5015	-0.000604526		-0.50075	-3.78009e-16		-0.501625	0.0168982
	-0.486646	0.00754715		-0.486708	-0.00426224		-0.486667	0.0559009		-0.486583	-0.000604526		-0.485757	-3.78009e-16		-0.486646	0.0168982
	-0.471583	0.00754715		-0.471771	-0.00426224		-0.471688	0.0559009		-0.471583	-0.000604526		-0.470765	-3.78009e-16		-0.471604	0.0168982
	-0.456583	0.00754715		-0.456687	-0.00426224		-0.456667	0.0559009		-0.456646	-0.000604526		-0.455772	-3.78009e-16		-0.456708	0.0168982
	-0.441604	0.00754715		-0.441667	-0.00426224		-0.441729	0.0559009		-0.441708	-0.000604526		-0.44078	-3.78009e-16		-0.441563	0.0168982
	-0.426646	0.00754715		-0.426771	-0.00426224		-0.426792	0.0559009		-0.426729	-0.000604526		-0.425787	-3.78009e-16		-0.426542	0.0168982
	-0.411708	0.00754715		-0.411812	-0.00426224		-0.411667	0.0559009		-0.41175	-0.000604526		-0.410795	-3.78009e-16		-0.411625	0.0168982
	-0.396729	0.00754715		-0.39675	-0.00426224		-0.396771	0.0559009		-0.396708	-0.000604526		-0.395802	-3.78009e-16		-0.396667	0.0168982
	-0.381708	0.00754715		-0.381708	-0.00426224		-0.381771	0.0559009		-0.381625	-0.000604526		-0.38081	-3.78009e-16		-0.381646	0.0168982
	-0.36675	0.00754715		-0.366771	-0.00426224		-0.366771	0.0559009		-0.366688	-0.000604526		-0.365817	-3.78009e-16		-0.366667	0.0168982
	-0.351833	0.00754715		-0.351854	-0.00426224		-0.351771	0.0559009		-0.351687	-0.000604526		-0.350825	-3.78009e-16		-0.351813	0.0168982
	-0.336771	0.00754715		-0.336833	-0.00426224		-0.336708	0.0559009		-0.336708	-0.000604526		-0.335832	-3.78009e-16		-0.336792	0.0168982
	-0.321792	0.00754715		-0.321917	-0.00426224		-0.321813	0.0559009		-0.321729	-0.000604526		-0.32084	-3.78009e-16		-0.321708	0.0168982
	-0.306792	0.00754715		-0.306854	-0.00426224		-0.306854	0.0559009		-0.306812	-0.000604526		-0.305847	-3.78009e-16		-0.306833	0.0168982
	-0.291813	0.00754715		-0.291875	-0.00426224		-0.291875	0.0559009		-0.291833	-0.000604526		-0.290855	-3.78009e-16		-0.291771	0.0168982
	-0.276792	0.00754715		-0.276896	-0.00426224		-0.276812	0.0559009		-0.276854	-0.000604526		-0.275862	-3.78009e-16		-0.276854	0.0168982
	-0.261896	0.00754715		-0.261958	-0.00426224		-0.261875	0.0559009		-0.261875	-0.000604526		-0.26087	-3.78009e-16		-0.261729	0.0168982
	-0.246875	0.00754715		-0.246958	-0.00426224		-0.246875	0.0559009		-0.246854	-0.000604526		-0.245877	-3.78009e-16		-0.246833	0.0168982
	-0.231917	0.00754715		-0.231979	-0.00426224		-0.231833	0.0559009		-0.231833	-0.000604526		-0.230885	-3.78009e-16		-0.231833	0.0168982
	-0.216854	0.00754715		-0.216938	-0.00426224		-0.216979	0.0559009		-0.216875	-0.000604526		-0.215892	-3.78009e-16		-0.216896	0.0168982
	-0.201958	0.00754715		-0.201938	-0.00426224		-0.201896	0.0559009		-0.201896	-0.000604526		-0.2009	-3.78009e-16		-0.201917	0.0168982
	-0.186687	0.00754715		-0.187042	-0.00426224		-0.187	0.0559009		-0.186937	-0.000604526		-0.185907	-3.78009e-16		-0.186833	0.0168982
	-0.171979	0.00754715		-0.172	-0.00426224		-0.172021	0.0559009		-0.172021	-0.000604526		-0.170915	-3.78009e-16		-0.171854	0.0168982
	-0.157	0.00754715		-0.157042	-0.00426224		-0.156937	0.0559009		-0.156979	-0.000604526		-0.155922	-3.78009e-16		-0.157021	0.0168982
	-0.141958	0.00754715		-0.142104	-0.00426224		-0.142062	0.0559009		-0.141875	-0.000604526		-0.14093	-3.78009e-16		-0.141958	0.0168982
	-0.126979	0.00754715		-0.127021	-0.00426224		-0.127	0.0559009		-0.127021	-0.000604526		-0.125937	-3.78009e-16		-0.126938	0.0168982
	-0.112104	0.00754715		-0.112125	-0.00426224		-0.111979	0.0559009		-0.111958	-0.000604526		-0.110945	-3.78009e-16		-0.111979	0.0168982
	-0.0970417	0.00754715		-0.0971042	-0.00426224		-0.0970208	0.0559009		-0.0969583	-0.000604526		-0.095952	-3.78009e-16		-0.096979	0.0168982
	-0.0820625	0.00754715		-0.0820625	-0.00426224		-0.0820417	0.0559009		-0.0819583	-0.000604526		-0.08096	-3.78009e-16		-0.081979	0.0168982
	-0.0670625	0.00754715		-0.0671667	-0.00426224		-0.067125	0.0559009		-0.0670417	-0.000604526		-0.065967	-3.78009e-16		-0.067042	0.0168982
	-0.0521667	0.00754715		-0.0521667	-0.00426224		-0.0521042	0.0559009		-0.0520833	-0.000604526		-0.050975	-3.78009e-16		-0.052083	0.0168982
	-0.0370417	0.00754715		-0.0370833	-0.00426224		-0.0371458	0.0559009		-0.0371042	-0.000604526		-0.035983	-3.78009e-16		-0.037062	0.0168982
	-0.0221458	0.00754715		-0.0222083	-0.00426224		-0.0221458	0.0559009		-0.0221667	-0.000604526		-0.02099	-3.78009e-16		-0.022083	0.0168982
	-0.0070625	0.00754715		-0.00720833	-0.00426224		-0.0071875	0.0559009		-0.0071875	-0.000604526		-0.005997	-3.78009e-16		-0.007125	0.0168982
	0.007875	0.00754715		0.00775	-0.00426224		0.007875	1.08487		0.0078125	-0.000604526		0.008995	-3.78009e-16		0.007896	0.0168982
	0.0227917	0.00754715		0.0227917	-0.00426224		0.0227292	0.852424		0.0228542	-0.000604526		0.023988	1.84726		0.022979	0.0168982
	0.0378958	0.00754715		0.0376875	-0.00426224		0.0378333	-1.15419		0.037875	-0.000604526		0.03898	1.43799		0.037917	0.0168982
	0.0528542	0.00754715		0.05275	-0.00426224		0.0527917	-1.76322		0.05275	-0.000604526		0.053972	-1.8362		0.052917	0.0168982
	0.0678542	0.00754715		0.0677083	-0.00426224		0.0677917	1.85403		0.0678333	-0.981169		0.068965	-1.84726		0.067833	0.0168982
	0.0827708	0.00754715		0.0827917	-0.00426224		0.0827292	1.57589		0.0828333	-0.685835		0.083957	1.67028		0.08275	0.0168982
	0.0976667	0.0377357		0.0977917	-0.00426224		0.0977083	-1.46139		0.0977083	0.165384		0.09895	1.33843		0.097729	0.0168982
	0.112667	0.0377357		0.112625	-0.00426224		0.112646	-1.31936		0.112708	-0.647819		0.113943	-0.143799		0.112729	0.0168982
	0.127771	0.0377357		0.127646	-0.00426224		0.127729	1.79608		0.12775	-0.675767		0.128935	0.221229		0.127708	0.0168982
	0.142708	0.0754715		0.142646	-0.00426224		0.142667	1.81158		0.142688	0.87826		0.143928	0.342905		0.142708	0.0168982
	0.157688	0.0754715		0.157625	-0.00426224		0.157646	-1.18666		0.157771	0.406079		0.15892	0.387151		0.157833	0.0168982
	0.172708	0.0754715		0.172625	-0.00426224		0.172687	-1.68453		0.172646	-0.451697		0.173913	0.132737		0.172687	0.0168982
	0.187646	0.0754715		0.187542	-0.00426224		0.187604	-1.5963		0.187708	0.709969		0.188905	0.630503		0.187667	0.0168982
	0.202604	0.0754715		0.202542	-0.00426224		0.202583	1.78171		0.202667	-0.422331		0.203898	-0.287598		0.202729	0.0168982
	0.217604	0.0754715		0.217604	-0.00426224		0.217542	1.2774		0.217667	-0.398708		0.21889	0.353966		0.217604	0.0168982
	0.232521	0.0754715		0.232583	-0.00426224		0.232542	-0.90774		0.232646	0.768701		0.233882	-0.254413		0.232708	0.0168982
	0.247562	0.0754715		0.247479	-0.00426224		0.247646	1.74499		0.247625	-0.444931		0.248875	0.807486		0.247646	-0.158421
	0.262583	0.0754715		0.262521	-0.00426224		0.262542	-0.000130002		0.262521	0.0162524		0.263867	0.851732		0.262625	-0.378394
	0.277625	0.0754715		0.277521	-0.00426224		0.277563	-1.19075		0.277542	0.64868		0.27886	1.21676		0.277625	-0.228633
	0.292583	0.0754715		0.292417	-0.00426224		0.292542	0.341483		0.292646	-0.379945		0.293853	-0.619441		0.292542	-0.0691138
	0.307562	0.0754715		0.307458	-0.00426224		0.307542	0.418997		0.307479	0.580624		0.308845	0.387151		0.3075	-0.0397109
	0.322521	0.0754715		0.322396	-0.00426224		0.322417	-1.08906		0.322542	0.499548		0.323838	-0.84067		0.322479	-0.257487
	0.337542	0.0679243		0.337417	-0.00426224		0.337583	0.346228		0.337563	-0.44621		0.33883	0.630503		0.337708	-0.0821677
	0.352438	0.0377357		0.352438	-0.00426224		0.352458	0.241934		0.352521	0.461881		0.353823	-0.15486		0.352458	-0.305436
	0.367437	0.0377357		0.367417	-0.00426224		0.367521	-0.766882		0.3675	0.508732		0.368815	0.796424		0.367458	-0.0261078
	0.382396	0.0377357		0.382417	-0.00426224		0.382458	0.421629		0.3825	-0.439955		0.383808	1.51542		0.3825	0.0621011
	0.397396	0.0377357		0.397479	-0.00426224		0.397375	-0.00809263		0.397521	0.447186		0.3988	1.47117		0.397604	-0.407248
	0.412417	0.0377357		0.412333	-0.00426224		0.412396	-0.475873		0.412396	0.447698		0.413793	1.37162		0.412521	-0.0125047
	0.427375	0.0377357		0.427396	-0.00426224		0.427375	0.429625		0.427375	-0.546445		0.428785	1.18358		0.427354	-0.15897
	0.442417	0.0377357		0.442333	-0.00426224		0.442312	-0.0537884		0.442438	0.570533		0.443777	1.12827		0.442354	0.0779009
	0.457417	0.0377357		0.457292	-0.00426224		0.457354	0.196563		0.457396	0.258598		0.45877	1.02871		0.457458	-0.153478
	0.472417	0.0377357		0.472229	-0.00426224		0.472417	0.519553		0.472417	-0.422843		0.473763	1.00659		0.472417	0.244011
	0.487396	0.0377357		0.487271	-0.00426224		0.487354	-0.241804		0.487292	0.607944		0.488755	0.962346		0.487312	0.1253
	0.502333	0.0377357		0.502208	-0.00426224		0.502375	0.15805		0.502271	0.168198		0.503748	0.84067		0.502438	-0.184529
	0.517271	0.0377357		0.51725	-0.00426224		0.517333	0.44334		0.517333	-0.343301		0.51874	0.730056		0.51725	0.406276
	0.532354	0.0377357		0.532292	-0.00426224		0.53225	-0.504408		0.532313	0.601434		0.533733	0.741117		0.532292	0.289763
	0.547208	0.0377357		0.547208	-0.00426224		0.547292	-0.374341		0.54725	-0.276013		0.548725	0.707933		0.547396	-0.00207004
	0.562271	0.0377357		0.562229	-0.00426224		0.562208	0.14713		0.562271	-0.335512		0.563718	0.652626		0.562375	0.259811
	0.577167	0.0377357		0.577208	0.022043		0.577292	-0.0183628		0.577229	0.556489		0.57871	0.619441		0.57725	-0.228633
	0.59225	0.0377357		0.592292	-0.118264		0.592167	-0.173423		0.592292	-0.264643		0.593703	0.597318		0.592229	0.484177
	0.607208	0.0377357		0.607125	-0.079763		0.607188	0.238359		0.607229	-0.070311		0.608695	0.564134		0.607208	-0.301591
	0.622208	0.0377357		0.622104	0.100959		0.622125	0.14011		0.622271	0.562488		0.623687	0.564134		0.622167	0.514678
	0.637146	0.0377357		0.637042	-0.232125		0.637229	-0.139135		0.637271	-0.456301		0.63868	0.453519		0.637167	-0.0162223
	0.652146	0.0377357		0.652125	-0.16348		0.652167	-0.138647		0.652188	0.501966		0.653673	0.464581		0.65225	0.410121
	0.667083	0.0377357		0.667104	0.254143		0.667187	-0.0875564		0.667167	0.397267		0.668665	0.442458		0.667146	0.327953
	0.682104	0.0377357		0.682146	-0.160604		0.682167	-0.093764		0.682167	-0.478645		0.683658	0.409274		0.682104	-0.265049
	0.697229	0.0377357		0.696979	-0.409291		0.697062	-0.0261954		0.697104	0.642286		0.69865	0.420335		0.697188	0.618687
	0.712146	0.0377357		0.711979	0.128638		0.712021	-0.0175503		0.712063	0.207655		0.713643	0.353966		0.712146	-0.322757
	0.727167	0.0377357		0.726938	0.107673		0.727125	-0.0407232		0.727146	-0.483621		0.728635	0.353966		0.727083	0.373155
	0.742146	0.0377357		0.742042	-0.337359		0.742042	-0.00971766		0.742021	0.687625		0.743628	0.353966		0.742146	-0.113092
	0.757042	0.0377357		0.757021	0.357862		0.757104	-0.00971766		0.757021	-0.51694		0.75862	0.365028		0.757021	-0.283046
	0.771958	0.0377357		0.772042	0.53201		0.772042	-0.00971766		0.772104	-0.278175		0.773613	0.365028		0.772104	0.472771
	0.787063	0.0377357		0.786938	-0.426969		0.787042	-0.00971766		0.787063	0.594668		0.788605	0.309721		0.787104	-0.263951
	0.802021	0.0377357		0.801979	0.306073		0.802042	-0.00971766		0.801938	-0.372411		0.803597	0.243352		0.802021	0.325756
	0.816896	0.0377357		0.816875	0.587227		0.816958	-0.00971766		0.816979	0.435189		0.81859	0.265475		0.817042	-0.100587
	0.831979	0.0377357		0.831854	-0.409843		0.831896	-0.00971766		0.832	0.6165		0.833583	0.309721		0.832083	-0.0702122
	0.847	0.0377357		0.846833	-0.0505821		0.846938	-0.00971766		0.846938	-0.434584		0.848575	0.287598		0.847021	0.270668
	0.861917	0.0377357		0.861833	0.56969		0.862167	-0.00971766		0.861875	0.682138		0.863568	0.265475		0.861979	0.447085
	0.876917	0.0377357		0.876833	-0.476434		0.876917	-0.00971766		0.876875	0.715968		0.87856	0.265475		0.876979	-0.0233618
	0.891875	0.0377357		0.891896	-0.0967607		0.891854	-0.00971766		0.891979	-0.5158		0.893553	0.276536		0.891917	0.123653
	0.906896	0.0377357		0.906813	0.566262		0.906896	-0.00221004		0.906938	0.602712		0.908545	0.276536		0.906896	0.0207426
	0.921854	0.0377357		0.921854	-0.466023		0.921833	-0.00221004		0.921875	0.480389		0.923538	0.276536		0.921812	0.0207426
	0.936812	0.0377357		0.936792	-0.293928		0.936792	-0.00221004		0.936917	-0.515544		0.93853	0.276536		0.936833	0.0784501
	0.951833	0.0377357		0.951771	0.459526		0.951833	0.0351656		0.951896	0.520869		0.953523	0.243352		0.951854	-0.0685646
	0.966813	0.0377357		0.966708	-0.476023		0.966896	0.0243754		0.966833	0.46609		0.968515	0.243352		0.966875	-0.0244602
	0.981833	0.0377357		0.981708	-0.331608		0.981813	0.0242486		0.981771	-0.413659		0.983507	0.188045		0.981812	0.0637486
	0.996792	0.0377357		0.996667	0.557905		0.996729	0.0246618		0.996792	0.246344		0.9985	0.188045		0.996812	0.0637486
	1.01181	0.0377357		1.01173	-0.435057		1.01171	0.0257304		1.01179	0.40301		1.01349	0.188045		1.01181	0.0637486
	1.02669	0.0377357		1.02671	-0.437111		1.02673	0.0256107		1.02683	-0.25597		1.02849	0.188045		1.02675	0.0637486
	1.04173	0.0377357		1.04167	0.395952		1.04167	0.0261925		1.04173	0.145086		1.04348	0.188045		1.04173	0.0637486
	1.05669	0.0377357		1.05667	-0.478219		1.05675	0.0274438		1.05681	0.0913299		1.05847	0.165922		1.05667	0.0637486
	1.07173	0.0377357		1.07169	-0.473148		1.07169	0.0292873		1.07173	-0.240392		1.07346	0.143799		1.07171	0.0637486
	1.08671	0.0377357		1.08663	0.540368		1.08673	0.0301213		1.08677	-0.177452		1.08845	0.15486		1.08673	0.0637486
	1.10167	0.0377357		1.10167	-0.27557		1.10167	0.0304196		1.10175	0.110861		1.10345	0.132737		1.10175	0.0637486
	1.11669	0.0377357		1.11652	-0.381073		1.11671	0.0307328		1.11665	-0.01223		1.11844	0.132737		1.11662	0.0637486
	1.13158	0.0377357		1.13154	0.552153		1.1316	0.0309731		1.13163	-0.0114627		1.13343	0.15486		1.13169	0.0637486
	1.14658	0.0377357		1.14654	-0.211443		1.14667	0.0310974		1.14658	-0.017973		1.14843	0.221229		1.14667	0.0637486
	1.16156	0.0377357		1.16152	-0.504935		1.1616	0.0313655		1.16156	-0.00967242		1.16342	0.23229		1.16165	0.0637486
	1.17656	0.0377357		1.1766	0.507348		1.17658	0.0316425		1.17652	-0.00967242		1.17841	0.23229		1.1766	0.0637486
	1.1915	0.0377357		1.19152	0.3147		1.19154	0.0314794		1.19167	-0.00967242		1.1934	0.23229		1.19154	0.0659454
	1.20662	0.0377357		1.20646	-0.626332		1.20662	0.0311014		1.20654	-0.00967242		1.2084	0.23229		1.20667	0.0659454
	1.2215	0.0377357		1.22152	0.421847		1.22154	0.0316759		1.22167	-0.00967242		1.22339	0.23229		1.22162	0.0659454
	1.23658	0.0377357		1.23652	0.38047		1.23654	0.0336026		1.23656	0.0983517		1.23838	0.23229		1.2365	0.0659454
	1.2515	0.0377357		1.25148	-0.401075		1.25154	0.0354281		1.25152	0.00169732		1.25337	0.23229		1.25162	0.0659454
	1.26648	0.0377357		1.2664	0.313878		1.26648	0.0358259		1.26652	0.00169732		1.26836	0.23229		1.26648	0.0659454
	1.28144	0.0377357		1.28138	0.359505		1.28148	0.0358834		1.2816	0.00169732		1.28336	0.23229		1.28154	0.0659454
	1.29648	0.543395		1.29635	-0.457254		1.29642	0.0360154		1.29648	0.00169732		1.29835	0.23229		1.29656	0.0659454
	1.31152	0.807545		1.31137	-0.0442786		1.31142	0.036014		1.3115	0.00169732		1.31334	0.23229		1.3115	0.0659454
	1.32644	2.52075		1.32644	0.286751		1.32644	0.036047		1.32642	0.00169732		1.32834	0.23229		1.32644	0.0659454
	1.3414	-1.11698		1.34144	-0.537954		1.3414	0.0362379		1.34138	0.00169732		1.34333	0.176983		1.3415	0.0659454
	1.35646	-0.324527		1.3564	-0.246928		1.35646	0.0366125		1.3564	0.00169732		1.35832	0.176983		1.35646	0.0659454
	1.37129	0.384904		1.37131	0.39472		1.37135	0.0365348		1.37135	0.00169732		1.37331	0.176983		1.3714	0.0659454
	1.38633	-1.76603		1.38633	-0.640171		1.38631	0.0365056		1.38638	0.00169732		1.3883	0.176983		1.38633	0.0659454
	1.40135	0.649055		1.40127	-0.305161		1.40133	0.0365828		1.40144	0.00169732		1.4033	0.176983		1.40133	0.0659454
	1.41631	1.95471		1.41623	0.385951		1.41631	0.0368474		1.41633	0.00169732		1.41829	0.176983		1.4164	0.0659454
	1.43129	-0.58113		1.43123	-0.527953		1.43129	0.0367548		1.43142	0.00169732		1.43328	0.176983		1.43129	0.0659454
	1.44631	-1.23018		1.44629	-0.421218		1.44638	0.0367216		1.44633	0.00169732		1.44827	0.176983		1.44629	0.0659454
	1.46133	-0.150943		1.46127	0.52735		1.46137	0.0365976		1.46129	0.00169732		1.46327	0.176983		1.46135	0.0659454
	1.47629	2.1132		1.47625	-0.553167		1.47627	0.0365357		1.47625	0.00169732		1.47826	0.176983		1.47621	0.0659454
	1.49125	2.72452		1.49129	-0.322839		1.49117	0.0367688		1.49133	0.00169732		1.49325	0.165922		1.49125	0.0659454
	1.50619	2.67169		1.50623	0.38088		1.50621	0.0373248		1.50621	0.00169732		1.50825	0.165922		1.50631	0.0659454
	1.52127	2.59622		1.52113	-0.368877		1.52121	0.0369873		1.52127	0.00169732		1.52324	0.165922		1.52133	0.0659454
	1.53621	2.59622		1.53613	-0.527543		1.53627	0.0368188		1.53621	0.0383409		1.53823	0.165922		1.53627	0.0659454
	1.55121	2.47546		1.5511	0.269484		1.55125	0.0371852		1.55117	0.0383409		1.55322	0.165922		1.55117	0.0659454
	1.56621	2.34716		1.56612	0.144801		1.56612	0.0368264		1.56627	0.0383409		1.56821	0.165922		1.56617	0.0659454
	1.58108	2.27924		1.58117	-0.590295		1.58121	0.0367723		1.58125	0.0383409		1.58321	0.165922		1.58123	0.0659454
	1.59608	2.09811		1.59608	-0.168692		1.59612	0.0364514		1.59623	0.0372965		1.5982	0.165922		1.59621	0.0659454
	1.61112	1.92452		1.61104	0.250445		1.61104	0.0363542		1.61121	0.0380238		1.61319	0.165922		1.61115	0.0659454
	1.62615	1.75849		1.626	-0.576867		1.62604	0.0362104		1.62608	0.0382873		1.62818	0.165922		1.62606	0.0659454
	1.64104	1.57735		1.641	-0.238981		1.64104	0.0362591		1.64108	0.0383984		1.64318	0.165922		1.64112	0.0659454
	1.6561	1.48679		1.656	0.365398		1.65602	0.036274		1.65615	0.0383984		1.65817	0.165922		1.65613	0.0659454
	1.67108	1.47169		1.671	-0.416557		1.67102	0.0367955		1.67115	0.0383984		1.67316	0.165922		1.67121	0.0365425
	1.68604	1.3132		1.68594	-0.402307		1.68598	0.0368871		1.68608	0.0383984		1.68816	0.165922		1.68602	0.0365425
	1.70096	1.20754		1.70092	0.447471		1.70102	0.0368079		1.70108	0.0383108		1.70315	0.165922		1.7011	0.00713951
	1.71606	1.16226		1.71588	-0.454237		1.71598	0.0368507		1.71604	0.0381538		1.71814	0.165922		1.71604	0.00713951
	1.731	1.13207		1.73092	-0.506989		1.73098	0.0368501		1.73102	0.0381538		1.73313	0.165922		1.73104	0.00713951
	1.74598	0.988676		1.7459	0.410613		1.74596	0.0367745		1.74598	0.0381441		1.74812	0.15486		1.74602	0.00713951
	1.76092	0.988676		1.76085	-0.456291		1.76102	0.0360981		1.761	0.0381408		1.76312	0.15486		1.76098	0.00713951
	1.7759	0.905658		1.7759	-0.641956		1.776	0.0361878		1.77606	0.0381495		1.77811	0.15486		1.77596	0.00713951
	1.7909	0.860375		1.7909	0.455829		1.79108	0.0361937		1.79096	0.0380632		1.7931	0.15486		1.79092	0.00713951
	1.80592	0.837733		1.80583	-0.13937		1.806	0.0362021		1.80594	0.0381686		1.8081	0.15486		1.80592	0.00713951
	1.82083	0.777356		1.82077	-0.631814		1.82092	0.0362613		1.82094	0.0390846		1.82309	0.15486		1.82094	0.00713951
	1.83583	0.747167		1.83577	0.0464225		1.83588	0.0364638		1.83585	0.0386124		1.83808	0.15486		1.83596	0.00713951
	1.85085	0.732073		1.85077	0.23866		1.8509	0.0367005		1.85083	0.0408929		1.85307	0.15486		1.85092	0.00713951
	1.86577	0.664149		1.86573	-0.236105		1.86581	0.0366285		1.86592	0.0396595		1.86807	0.15486		1.86592	0.00713951
	1.88077	0.664149		1.88075	-0.141424		1.88079	0.0370684		1.88085	0.0395652		1.88306	0.15486		1.88081	0.00713951
	1.89579	0.603772		1.89571	-0.143889		1.89579	0.0371312		1.89579	0.0395771		1.89805	0.15486		1.89579	0.00713951
	1.91077	0.0603772		1.91077	-0.0333148		1.91075	0.0369764		1.91077	0.0395771		1.91304	0.15486		1.91079	0.00713951
	1.92571	0.709432		1.92575	-0.0333148		1.92583	0.0367549		1.92585	0.0409118		1.92803	0.15486		1.92579	0.00713951
	1.94073	0.84528		1.94073	-0.0333148		1.94121	0.0362005		1.94085	0.0407584		1.94303	0.15486		1.94081	0.00713951
	1.95571	0.566036		1.95565	-0.0760657		1.95575	0.0362741		1.95571	0.0406198		1.95802	0.15486		1.95575	0.00713951
	1.97069	0.558489		1.97067	-0.0760657		1.97073	0.0365653		1.97073	0.0400122		1.97301	0.15486		1.97079	0.00713951
	1.98573	0.550942		1.98573	-0.0760657		1.98565	0.0368059		1.98569	0.0401563		1.98801	0.15486		1.98577	0.00713951
	2.00065	0.550942		2.00063	-0.0609937		2.00065	0.0367627		2.00073	0.0401562		2.003	0.15486		2.00077	0.00713951
	2.01565	0.550942		2.01571	-0.057566		2.01573	0.036646		2.01577	0.0401562		2.01799	0.15486		2.01579	0.00713951
	2.03058	0.550942		2.03062	-0.0526362		2.03058	0.0364979		2.03067	0.0390458		2.03298	0.15486		2.03073	0.00713951
	2.04558	0.550942		2.04556	-0.0366014		2.04563	0.0361968		2.04569	0.0380954		2.04798	0.15486		2.04573	0.00713951
	2.06065	0.550942		2.06069	-0.0646911		2.0606	0.0363477		2.06065	0.0383421		2.06297	0.15486		2.06065	0.00713951
	2.0756	0.550942		2.07565	-0.0646911		2.07567	0.0365058		2.07558	0.038308		2.07796	0.15486		2.07565	0.00713951
	2.09054	0.437734		2.0905	-0.0646911		2.09065	0.0365001		2.09069	0.0383303		2.09295	0.15486		2.09067	0.00713951
	2.10552	0.437734		2.10558	-0.0646911		2.1056	0.0365358		2.10565	0.0383303		2.10794	0.15486		2.1056	0.00713951
	2.1205	0.437734		2.12048	-0.0655128		2.12056	0.0365245		2.1206	0.0383303		2.12294	0.15486		2.12062	0.00713951
	2.13556	0.437734		2.13548	-0.0412616		2.13554	0.036512		2.13563	0.0383303		2.13793	0.15486		2.13558	0.00713951
	2.15048	0.437734		2.1505	-0.0412616		2.1506	0.0364994		2.15052	0.0383303		2.15292	0.15486		2.15058	0.00713951
	2.1655	0.437734		2.16552	-0.0412616		2.16548	0.0364465		2.16558	0.0382029		2.16791	0.15486		2.16554	0.00713951
	2.1805	0.437734		2.18044	-0.0412616		2.18042	0.0363239		2.18048	0.0379028		2.18291	0.15486		2.18054	0.00713951
	2.19548	0.354716		2.19546	-0.0412616		2.19544	0.0361076		2.19548	0.037965		2.1979	0.15486		2.19548	0.00713951
	2.21054	0.354716		2.21044	-0.0412616		2.21044	0.0360996		2.21054	0.0379916		2.21289	0.15486		2.21048	0.0659454
	2.22546	0.354716		2.2254	-0.0412616		2.22552	0.0361634		2.22546	0.0381044		2.22789	0.15486		2.22554	0.0659454
	2.24052	0.354716		2.24033	-0.0412616		2.24046	0.0362762		2.24052	0.0379297		2.24288	0.15486		2.24052	0.0659454
	2.25542	0.354716		2.25531	-0.0412616		2.2555	0.0362713		2.25548	0.0379981		2.25787	0.15486		2.25548	0.0659454
	2.27046	0.354716		2.27029	-0.0412616		2.27046	0.0362676		2.27046	0.0379981		2.27286	0.15486		2.27048	0.0659454
	2.2854	1.07924		2.28538	-0.0412616		2.28544	0.0362797		2.28538	0.0380504		2.28785	0.15486		2.28546	0.0659454
	2.30044	0.445282		2.30042	-0.0412616		2.30029	0.036287		2.30037	0.0380123		2.30285	0.15486		2.30046	0.0659454
	2.31533	1.53962		2.31531	-0.0412616		2.31544	0.0362135		2.31538	0.0380724		2.31784	0.15486		2.31531	0.0659454
	2.33035	1.75094		2.33025	-0.0412616		2.33029	0.036235		2.33042	0.0380724		2.33283	0.15486		2.33052	0.0659454
	2.34527	1.94716		2.34525	-0.0408591		2.34529	0.0361451		2.3454	0.0376159		2.34782	0.15486		2.34533	0.0659454
	2.36025	2.15848		2.36021	-0.0402563		2.36038	0.0355632		2.36033	0.0377665		2.36282	0.15486		2.36031	0.0659454
	2.37529	2.00754		2.37527	-0.0402856		2.37533	0.0361065		2.3754	0.0376511		2.37781	0.15486		2.37538	0.0659454
	2.39029	1.94716		2.39017	-0.0406644		2.39031	0.0362545		2.3904	0.0376698		2.3928	0.15486		2.39033	0.0659454
	2.40531	1.8415		2.40523	-0.0406644		2.40533	0.0362255		2.40531	0.0376698		2.4078	0.15486		2.40533	0.0659454
	2.42027	1.79622		2.42023	-0.0406643		2.42025	0.0362626		2.42023	0.0382124		2.42279	0.15486		2.42029	0.0659454
	2.43527	1.64528		2.43523	-0.0406876		2.43517	0.036235		2.43523	0.0386154		2.43778	0.15486		2.43523	0.0659454
	2.45023	1.47924		2.45008	-0.0367384		2.45023	0.0360416		2.45023	0.0386686		2.45277	0.15486		2.45031	0.0659454
	2.46519	1.44905		2.46517	-0.0352559		2.46523	0.0360892		2.46523	0.0386598		2.46776	0.15486		2.46531	0.0659454
	2.48019	1.33584		2.48015	-0.0354564		2.48031	0.0361941		2.48019	0.0386598		2.48276	0.15486		2.48017	0.0659454
	2.49521	1.27547		2.49506	-0.045511		2.49508	0.0362743		2.49515	0.0390422		2.49775	0.15486		2.49517	0.0659454
	2.51023	1.26792		2.51019	-0.045511		2.51019	0.0362379		2.51019	0.0383627		2.51274	0.15486		2.51019	0.0659454
	2.5251	1.1849		2.52508	-0.045511		2.52517	0.0361737		2.52519	0.0384177		2.52773	0.15486		2.52515	0.0659454
	2.54017	1.10943		2.54002	-0.045511		2.54017	0.0361963		2.54017	0.0384184		2.54273	0.15486		2.54013	0.0659454
	2.55513	1.08679		2.55498	-0.045511		2.55517	0.0362023		2.55513	0.0384679		2.55772	0.15486		2.55517	0.0659454
	2.57017	1.03396		2.57004	-0.045511		2.57006	0.0363481		2.57012	0.0384286		2.57271	0.15486		2.57008	0.0659454
	2.58504	0.988676		2.585	-0.045511		2.58515	0.0363217		2.58504	0.0384286		2.58771	0.15486		2.58506	0.0659454
	2.60006	0.913205		2.6	-0.045511		2.6001	0.0362362		2.60008	0.0384286		2.6027	0.15486		2.60006	0.0659454
	2.61498	0.913205		2.615	-0.045511		2.61508	0.0362489		2.6151	0.0384286		2.61769	0.15486		2.6151	0.0659454
	2.62996	0.837733		2.63	-0.045511		2.6301	0.0362403		2.63008	0.0384286		2.63268	0.143799		2.62998	0.0659454
	2.64504	0.837733		2.645	-0.045511		2.64498	0.0363709		2.64498	0.038602		2.64768	0.143799		2.64502	0.0659454
	2.66	0.747167		2.65988	-0.045511		2.66	0.0363016		2.66	0.0396399		2.66267	0.143799		2.66004	0.0659454
	2.67496	0.747167		2.6749	-0.045511		2.67504	0.0363101		2.67502	0.0393923		2.67766	0.143799		2.67508	0.0659454
	2.68998	0.747167		2.68985	-0.045511		2.69002	0.0362729		2.68998	0.0392526		2.69265	0.143799		2.69	0.0659454
	2.70502	0.747167		2.70483	-0.045511		2.70492	0.0362959		2.705	0.0391475		2.70764	0.143799		2.70504	0.0659454
	2.7199	0.709432		2.7199	-0.045511		2.71998	0.036344		2.71996	0.0391475		2.72264	0.143799		2.72008	0.0659454
	2.73487	0.709432		2.73479	-0.045511		2.73483	0.0363301		2.73502	0.039755		2.73763	0.143799		2.73496	0.0659454
	2.74988	0.68679		2.7499	-0.045511		2.74992	0.0362768		2.7499	0.0395724		2.75262	0.143799		2.74996	0.0659454
	2.76487	0.656602		2.76487	-0.045511		2.76483	0.0362935		2.76496	0.0404969		2.76762	0.143799		2.76485	0.0659454
	2.77981	0.63396		2.77983	-0.045511		2.77987	0.0362783		2.77987	0.0399314		2.78261	0.143799		2.77992	0.0659454
	2.79481	0.63396		2.79473	-0.045511		2.79479	0.0363717		2.7949	0.039793		2.7976	0.143799		2.79485	0.0659454
	2.8099	0.63396		2.80981	-0.045511		2.80985	0.0363617		2.80981	0.0396973		2.81259	0.143799		2.80983	0.0659454
	2.82483	0.63396		2.82471	-0.045511		2.82483	0.0363641		2.82485	0.0397422		2.82759	0.143799		2.82494	0.0659454
	2.83985	0.63396		2.83969	-0.045511		2.83977	0.0363646		2.83979	0.0397422		2.84258	0.143799		2.83977	0.0659454
	2.85481	0.596225		2.85473	-0.045511		2.85485	0.0363668		2.85477	0.0396124		2.85757	0.143799		2.8549	0.0659454
	2.86983	0.596225		2.86969	-0.045511		2.86971	0.0363645		2.86983	0.0393626		2.87256	0.143799		2.86979	0.0659454
	2.88471	0.543395		2.88469	-0.045511		2.88473	0.0363676		2.88483	0.0393939		2.88755	0.143799		2.88481	0.0659454
	2.89971	0.543395		2.89975	-0.045511		2.89973	0.0363779		2.89977	0.0393939		2.90255	0.143799		2.89977	0.0365425
	2.91467	0.543395		2.91473	-0.045511		2.91473	0.0363717		2.91475	0.0393939		2.91754	0.143799		2.91481	0.0365425
	2.92975	0.543395		2.9296	-0.045511		2.92969	0.0363674		2.92969	0.039394		2.93253	0.143799		2.92973	0.0365425
	2.9446	0.543395		2.94469	-0.045511		2.94467	0.0362856		2.94469	0.0439827		2.94753	0.143799		2.94473	0.0365425
	2.9596	0.543395		2.95956	-0.045511		2.95962	0.0363181		2.95965	0.0445255		2.96252	0.143799		2.95965	0.0365425
	2.9746	0.5283		2.97462	-0.045511		2.97465	0.0363354		2.97467	0.0445687		2.97751	0.143799		2.97469	0.0365425
	2.9896	0.5283		2.9899	-0.045511		2.98971	0.0363513		2.98967	0.0445931		2.9925	0.143799		2.98975	0.0365425
	3.00467	0.5283		3.0046	-0.045511		3.00456	0.0363658		3.00469	0.0446188		3.0075	0.143799		3.00469	0.0365425
	3.01954	0.505659		3.01954	-0.045511		3.01965	0.0363794		3.01962	0.044646		3.02249	0.143799		3.0196	0.0365425
	3.0346	0.505659		3.03458	-0.045511		3.0346	0.0363797		3.0346	0.044646		3.03748	0.143799		3.0346	0.0365425
	3.0496	0.483017		3.0495	-0.045511		3.04956	0.0363852		3.04967	0.044646		3.05247	0.143799		3.0496	0.0365425
	3.06452	0.483017		3.06454	-0.045511		3.0646	0.0363825		3.06458	0.044646		3.06746	0.143799		3.06454	0.0365425
	3.07954	0.483017		3.07954	-0.045511		3.07952	0.0363798		3.07956	0.044646		3.08246	0.143799		3.0796	0.0365425
	3.09456	0.460376		3.09452	-0.045511		3.09467	0.0363168		3.09454	0.044646		3.09745	0.143799		3.0945	0.0365425
	3.10952	0.445282		3.10954	-0.045511		3.10956	0.0363372		3.1095	0.044646		3.11244	0.143799		3.10948	0.0365425
	3.12448	0.445282		3.12437	-0.045511		3.12456	0.0363647		3.12452	0.044646		3.12744	0.143799		3.12448	0.0365425
	3.13952	0.445282		3.13942	-0.045511		3.13944	0.0363455		3.13948	0.044646		3.14243	0.143799		3.13952	0.0365425
	3.15452	0.42264		3.15433	-0.045511		3.15442	0.0363516		3.15444	0.0445665		3.15742	0.143799		3.15442	0.0365425
	3.16944	0.415093		3.16942	-0.045511		3.16944	0.0363558		3.16944	0.0447114		3.17241	0.143799		3.16948	0.0365425
	3.18454	0.415093		3.18444	-0.045511		3.18444	0.0363572		3.18454	0.0446946		3.18741	0.143799		3.18444	0.0365425
	3.19937	0.415093		3.19942	-0.045511		3.19933	0.0363572		3.19935	0.0446945		3.2024	0.143799		3.1994	0.0365425
	3.21433	0.415093		3.21444	-0.045511		3.21435	0.0363718		3.21444	0.0446945		3.21739	0.143799		3.21446	0.0365425
	3.22938	0.415093		3.2294	-0.045511		3.22933	0.0363398		3.2295	0.0446945		3.23238	0.143799		3.22944	0.0365425
	3.24442	0.415093		3.24429	-0.045511		3.24442	0.036317		3.24435	0.046013		3.24737	0.143799		3.24433	0.0365425
	3.25929	0.415093		3.25921	-0.045511		3.2594	0.0362926		3.25933	0.0455689		3.26237	0.143799		3.25933	0.0365425
	3.2744	0.415093		3.27435	-0.045511		3.2744	0.0362944		3.2744	0.0455689		3.27736	0.143799		3.27438	0.0365425
	3.28935	0.377357		3.28925	-0.045511		3.28937	0.0362993		3.28944	0.0455689		3.29235	0.143799		3.28944	0.0365425
	3.30448	0.377357		3.30417	-0.0454805		3.30425	0.0363055		3.30433	0.0456425		3.30735	0.143799		3.30429	0.0365425
	3.31935	0.377357		3.31921	-0.0452367		3.31931	0.0363104		3.31925	0.0455664		3.32234	0.143799		3.31929	0.0365425
	3.33421	0.377357		3.33425	-0.0452561		3.33421	0.036315		3.33431	0.0458321		3.33733	0.143799		3.33425	0.0365425
	3.34925	0.377357		3.34925	-0.045256		3.34929	0.0363387		3.34925	0.0461796		3.35232	0.143799		3.34927	0.0365425
	3.36435	0.377357		3.36412	-0.0414814		3.36421	0.0363573		3.36423	0.045941		3.36732	0.143799		3.36423	0.0365425
	3.37929	0.347169		3.37915	-0.0409432		3.37921	0.0363533		3.37923	0.0456981		3.38231	0.143799		3.37921	0.0365425
	3.39423	0.347169		3.39415	-0.0416788		3.39425	0.0362525		3.39425	0.0439344		3.3973	0.143799		3.39423	0.0365425
	3.40915	0.347169		3.40917	-0.0413739		3.40923	0.0363204		3.40937	0.0443107		3.41229	0.143799		3.40925	0.0365425
	3.42425	0.347169		3.42404	-0.0411371		3.42421	0.0363001		3.42413	0.0443107		3.42728	0.143799		3.42421	0.0365425
	3.43923	0.347169		3.43908	-0.0410229		3.43912	0.0362986		3.43919	0.0443107		3.44228	0.143799		3.43919	0.0365425
	3.4541	0.347169		3.45404	-0.0409686		3.45417	0.0362956		3.4541	0.0443107		3.45727	0.143799		3.45419	0.0365425
	3.46915	0.347169		3.469	-0.0409375		3.46919	0.0363977		3.46921	0.0443107		3.47226	0.143799		3.4691	0.0365425
	3.48417	0.347169		3.48398	-0.0409378		3.48415	0.0363639		3.4841	0.044429		3.48726	0.143799		3.48421	0.0365425
	3.49908	0.347169		3.49902	-0.0409376		3.49904	0.0363598		3.49913	0.0443741		3.50225	0.143799		3.49917	0.0365425
	3.514	0.347169		3.51396	-0.0409376		3.51404	0.0363523		3.51408	0.0444103		3.51724	0.143799		3.51419	0.0365425
	3.52908	0.347169		3.52898	-0.0409376		3.529	0.036346		3.5291	0.0443929		3.53223	0.143799		3.52915	0.0365425
	3.54408	0.347169		3.54402	-0.0409376		3.54402	0.0363554		3.5441	0.0445569		3.54723	0.143799		3.54402	0.0365425
	3.55908	0.347169		3.5589	-0.0409376		3.55902	0.0363591		3.55912	0.0445569		3.56222	0.143799		3.55902	0.0365425
	3.574	0.347169		3.574	-0.0409375		3.57394	0.0363613		3.5741	0.0445569		3.57721	0.143799		3.57398	0.0365425
	3.58902	0.347169		3.58894	-0.0411014		3.58896	0.0363709		3.58898	0.0463122		3.5922	0.143799		3.589	0.0365425
	3.60398	0.347169		3.60385	-0.0403691		3.60394	0.0363599		3.604	0.0453501		3.60719	0.143799		3.60398	0.0365425
	3.61898	0.347169		3.61894	-0.0404844		3.61894	0.0363538		3.61898	0.0450916		3.62219	0.143799		3.61902	0.0365425
	3.6339	0.347169		3.6339	-0.040516		3.6339	0.0363522		3.63404	0.044877		3.63718	0.143799		3.634	0.0365425
	3.64892	0.347169		3.64892	-0.0405159		3.64898	0.0364093		3.64894	0.0447176		3.65217	0.143799		3.649	0.0365425
	3.66396	0.347169		3.6639	-0.040516		3.6639	0.0363881		3.66392	0.0445274		3.66716	0.143799		3.66398	0.0365425
	3.67898	0.347169		3.6789	-0.0405358		3.67883	0.0363492		3.67894	0.044544		3.68216	0.143799		3.6789	0.0365425
	3.6939	0.347169		3.69396	-0.0401441		3.6939	0.0363841		3.694	0.044544		3.69715	0.143799		3.69392	0.0365425
	3.70883	0.332074		3.70875	-0.0397231		3.70881	0.0363856		3.7089	0.044544		3.71214	0.143799		3.70883	0.0365425
	3.72392	0.332074		3.72379	-0.0399084		3.72381	0.0363816		3.72392	0.044544		3.72714	0.143799		3.72392	0.0365425
	3.73877	0.332074		3.73873	-0.0400875		3.73885	0.0363816		3.73883	0.044544		3.74213	0.143799		3.73885	0.0365425
	3.75377	0.332074		3.75385	-0.0401173		3.75385	0.0363816		3.7539	0.0445094		3.75712	0.143799		3.75379	0.0365425
	3.76888	0.332074		3.76879	-0.0401174		3.76879	0.0363816		3.76883	0.0445094		3.77211	0.143799		3.76887	0.0365425
	3.78385	0.279244		3.78369	-0.0401173		3.78377	0.0363816		3.78375	0.0445094		3.7871	0.143799		3.78379	0.0365425
	3.79877	0.279244		3.79879	-0.0401173		3.79877	0.0363816		3.79885	0.0445094		3.8021	0.143799		3.79883	0.0365425
	3.81383	0.271697		3.81365	-0.0401173		3.81377	0.0363874		3.81375	0.0445094		3.81709	0.143799		3.81377	0.0365425
	3.82869	0.271697		3.8286	-0.0411415		3.82869	0.0363815		3.82877	0.0445094		3.83208	0.143799		3.82871	0.0365425
	3.84377	0.271697		3.8436	-0.045511		3.84369	0.0363887		3.84375	0.0485047		3.84707	0.143799		3.84373	0.0365425
	3.85873	0.271697		3.85865	-0.045511		3.85871	0.036395		3.85871	0.0494663		3.86207	0.143799		3.85879	0.0365425
	3.87367	0.271697		3.87367	-0.0451682		3.8736	0.0363898		3.87371	0.0495987		3.87706	0.143799		3.87377	0.0365425
	3.88865	0.271697		3.8886	-0.0452669		3.8886	0.0363847		3.88869	0.0497381		3.89205	0.143799		3.88869	0.0365425
	3.90362	0.271697		3.90362	-0.0462665		3.9036	0.0363763		3.90373	0.0498666		3.90705	0.143799		3.90369	0.0365425
	3.91862	0.271697		3.91852	-0.0457855		3.91867	0.0363789		3.91867	0.0499862		3.92204	0.143799		3.91865	0.0365425
	3.93363	0.271697		3.93358	-0.0457157		3.93358	0.0363946		3.93373	0.0499862		3.93703	0.143799		3.93377	0.0365425
	3.94858	0.271697		3.94856	-0.0457158		3.9486	0.036374		3.94862	0.0499862		3.95202	0.143799		3.94865	0.0365425
	3.96363	0.271697		3.96348	-0.0457157		3.96363	0.0363753		3.96363	0.0500234		3.96701	0.143799		3.96362	0.0365425
	3.9786	0.271697		3.97852	-0.0456922		3.97854	0.0363103		3.97858	0.050163		3.98201	0.143799		3.97865	0.0365425
	3.99362	0.271697		3.99348	-0.0457128		3.99356	0.0363282		3.99358	0.0501436		3.997	0.143799		3.99354	0.0365425
	4.00846	0.271697		4.0085	-0.0454662		4.0085	0.0364543		4.00856	0.0501596		4.01199	0.143799		4.00854	0.0365425
