# Supplementary material for: Optogenetic manipulation of neuronal and cardiomyocyte functions in zebrafish using microbial rhodopsins and adenylyl cyclases
Source: eLife. 2023 Aug 17;12:e83975. doi: 10.7554/eLife.83975 (PMC10435232; doi:10.7554/eLife.83975)
Supplement: Figure 3—figure supplement 1—source data 1. [file elife-83975-fig3-figsupp1-data1.xlsx]

## Sheet: data
Line	sample number	trial number	latency
GtCCR4-3.0-EYFP	1	4	0.01
GtCCR4-3.0-EYFP	1	6	0.24
GtCCR4-3.0-EYFP	2	1	1.2
GtCCR4-3.0-EYFP	2	2	0.1
GtCCR4-3.0-EYFP	2	3	2.9
GtCCR4-3.0-EYFP	2	4	2.8
GtCCR4-3.0-EYFP	2	5	3.06
GtCCR4-3.0-EYFP	2	6	0.05
GtCCR4-3.0-EYFP	3	1	3.63
GtCCR4-3.0-EYFP	3	6	1.06
GtCCR4-3.0-EYFP	4	1	1.19
GtCCR4-3.0-EYFP	4	2	0.1
GtCCR4-3.0-EYFP	4	4	0.095
GtCCR4-3.0-EYFP	4	5	0.095
GtCCR4-3.0-EYFP	4	6	0.02
GtCCR4-3.0-EYFP	5	2	0.08
GtCCR4-3.0-EYFP	5	4	0.21
GtCCR4-3.0-EYFP	6	1	0.155
GtCCR4-3.0-EYFP	6	4	1.324
GtCCR4-3.0-EYFP	6	5	0.125
GtCCR4-3.0-EYFP	6	6	2.942
GtCCR4-3.0-EYFP	7	1	3.4
GtCCR4-3.0-EYFP	7	2	4.38
GtCCR4-3.0-EYFP	7	4	0.15
GtCCR4-3.0-EYFP	7	5	0.12
GtCCR4-3.0-EYFP	7	6	4.08
GtCCR4-3.0-EYFP	8	5	6.77
GtCCR4-3.0-EYFP	8	6	2.32
GtCCR4-MT	1	4	0.245
GtCCR4-MT	1	5	0.38
GtCCR4-MT	2	1	2.867
GtCCR4-MT	2	3	1.024
GtCCR4-MT	2	6	2.313
GtCCR4-MT	3	1	0.964
GtCCR4-MT	3	5	0.065
GtCCR4-MT	3	6	0.05
GtCCR4-MT	4	3	1.383
GtCCR4-MT	4	6	4.71
GtCCR4-MT	5	4	0.514
GtCCR4-MT	6	2	5.234
GtCCR4-MT	6	3	2.283
GtCCR4-MT	6	6	0.829
GtCCR4-MT	7	1	0.14
GtCCR4-MT	7	2	0.125
GtCCR4-MT	7	3	0.065
GtCCR4-MT	7	4	0.02
GtCCR4-MT	7	5	0.035
GtCCR4-MT	7	6	0.095
GtCCR4-MT	8	2	0.095
GtCCR4-MT	8	4	0.095
GtCCR4-MT	8	5	0.11
GtCCR4-MT	8	6	0.11
KnChR-3.0-EYFP	1	2	0.007
KnChR-3.0-EYFP	1	4	0.007
KnChR-3.0-EYFP	1	5	0.052
KnChR-3.0-EYFP	1	6	0.007
KnChR-3.0-EYFP	2	2	0.037
KnChR-3.0-EYFP	2	3	0.022
KnChR-3.0-EYFP	2	4	0.007
KnChR-3.0-EYFP	2	5	0.022
KnChR-3.0-EYFP	3	1	0.007
KnChR-3.0-EYFP	3	2	0.037
KnChR-3.0-EYFP	3	5	0.037
KnChR-3.0-EYFP	4	1	0.037
KnChR-3.0-EYFP	4	3	0.022
KnChR-3.0-EYFP	5	2	0.007
KnChR-3.0-EYFP	5	3	0
KnChR-3.0-EYFP	5	6	0
KnChR-3.0-EYFP	6	6	0.007
KnChR-3.0-EYFP	7	1	0.067
KnChR-3.0-EYFP	7	2	0
KnChR-3.0-EYFP	7	6	0.007
KnChR-3.0-EYFP	8	1	0.022
KnChR-3.0-EYFP	8	2	0.022
KnChR-3.0-EYFP	8	3	0.052
KnChR-3.0-EYFP	8	4	0.037
KnChR-3.0-EYFP	8	6	0.007
