# Supplementary material for: Optogenetic manipulation of neuronal and cardiomyocyte functions in zebrafish using microbial rhodopsins and adenylyl cyclases
Source: eLife. 2023 Aug 17;12:e83975. doi: 10.7554/eLife.83975 (PMC10435232; doi:10.7554/eLife.83975)
Supplement: Figure 3—figure supplement 2—source data 1. [file elife-83975-fig3-figsupp2-data1.xlsx]

## Sheet: B
Line	light intensity	sample	trial	latency
GtCCR4-3.0-EYFP	0.4	1	1	0.2
GtCCR4-3.0-EYFP	0.4	1	2	0.14
GtCCR4-3.0-EYFP	0.4	1	3	0.215
GtCCR4-3.0-EYFP	0.4	1	4	0.065
GtCCR4-3.0-EYFP	0.4	1	5	0.08
GtCCR4-3.0-EYFP	0.4	1	6	0.065
GtCCR4-3.0-EYFP	0.4	2	1	0.18
GtCCR4-3.0-EYFP	0.4	2	3	0.035
GtCCR4-3.0-EYFP	0.4	2	5	0.11
GtCCR4-3.0-EYFP	0.4	3	1	0.45
GtCCR4-3.0-EYFP	0.4	3	2	0.13
GtCCR4-3.0-EYFP	0.4	3	3	0.14
GtCCR4-3.0-EYFP	0.4	3	4	0.155
GtCCR4-3.0-EYFP	0.4	3	5	0.23
GtCCR4-3.0-EYFP	0.4	3	6	0.14
GtCCR4-3.0-EYFP	0.4	4	1	0.35
GtCCR4-3.0-EYFP	0.4	4	2	0.23
GtCCR4-3.0-EYFP	0.4	4	3	0.32
GtCCR4-3.0-EYFP	0.4	4	6	0.35
GtCCR4-3.0-EYFP	0.2	4	8	1.16
GtCCR4-3.0-EYFP	0.2	4	11	0.18
GtCCR4-3.0-EYFP	0.1	4	18	0.32
GtCCR4-3.0-EYFP	0.4	5	1	0.44
GtCCR4-3.0-EYFP	0.4	5	2	0.17
GtCCR4-3.0-EYFP	0.4	5	5	0.26
GtCCR4-3.0-EYFP	0.4	5	6	0.05
GtCCR4-3.0-EYFP	0.4	6	1	0.38
GtCCR4-3.0-EYFP	0.4	6	2	0.48
GtCCR4-3.0-EYFP	0.4	6	5	0.18
GtCCR4-3.0-EYFP	0.2	6	7	0.18
GtCCR4-3.0-EYFP	0.2	6	8	2.18
KnChR-3.0-EYFP	0.4	1	1	0.08
KnChR-3.0-EYFP	0.4	1	2	0.005
KnChR-3.0-EYFP	0.4	1	3	0.005
KnChR-3.0-EYFP	0.4	1	4	0.005
KnChR-3.0-EYFP	0.4	1	5	0.02
KnChR-3.0-EYFP	0.4	1	6	0.05
KnChR-3.0-EYFP	0.2	1	7	0.07
KnChR-3.0-EYFP	0.2	1	8	0.08
KnChR-3.0-EYFP	0.2	1	9	0.08
KnChR-3.0-EYFP	0.2	1	10	0.06
KnChR-3.0-EYFP	0.2	1	11	0.05
KnChR-3.0-EYFP	0.2	1	12	0.02
KnChR-3.0-EYFP	0.1	1	13	0.14
KnChR-3.0-EYFP	0.1	1	14	0.11
KnChR-3.0-EYFP	0.1	1	15	0.09
KnChR-3.0-EYFP	0.1	1	16	0.02
KnChR-3.0-EYFP	0.1	1	17	0.11
KnChR-3.0-EYFP	0.1	1	18	0.11
KnChR-3.0-EYFP	0.4	2	1	0.08
KnChR-3.0-EYFP	0.4	2	2	0.05
KnChR-3.0-EYFP	0.4	2	3	0.03
KnChR-3.0-EYFP	0.4	2	4	0.005
KnChR-3.0-EYFP	0.4	2	5	0.06
KnChR-3.0-EYFP	0.4	2	6	0.09
KnChR-3.0-EYFP	0.2	2	7	0.005
KnChR-3.0-EYFP	0.2	2	8	0.05
KnChR-3.0-EYFP	0.2	2	9	0.05
KnChR-3.0-EYFP	0.2	2	10	0.03
KnChR-3.0-EYFP	0.2	2	11	0.05
KnChR-3.0-EYFP	0.2	2	12	0.14
KnChR-3.0-EYFP	0.1	2	13	0.06
KnChR-3.0-EYFP	0.1	2	14	0.11
KnChR-3.0-EYFP	0.1	2	15	0.05
KnChR-3.0-EYFP	0.1	2	16	0.06
KnChR-3.0-EYFP	0.1	2	17	0.17
KnChR-3.0-EYFP	0.1	2	18	0.05
KnChR-3.0-EYFP	0.4	3	1	0.03
KnChR-3.0-EYFP	0.4	3	2	0.05
KnChR-3.0-EYFP	0.4	3	3	0.05
KnChR-3.0-EYFP	0.4	3	4	0.005
KnChR-3.0-EYFP	0.4	3	5	0.03
KnChR-3.0-EYFP	0.4	3	6	0.005
KnChR-3.0-EYFP	0.2	3	7	0.005
KnChR-3.0-EYFP	0.2	3	8	0.11
KnChR-3.0-EYFP	0.2	3	9	0.05
KnChR-3.0-EYFP	0.2	3	10	0.06
KnChR-3.0-EYFP	0.2	3	11	0.06
KnChR-3.0-EYFP	0.2	3	12	0.08
KnChR-3.0-EYFP	0.1	3	13	0.065
KnChR-3.0-EYFP	0.1	3	14	0.08
KnChR-3.0-EYFP	0.1	3	15	0.065
KnChR-3.0-EYFP	0.1	3	16	0.11
KnChR-3.0-EYFP	0.1	3	17	0.08
KnChR-3.0-EYFP	0.1	3	18	0.05
KnChR-3.0-EYFP	0.4	4	1	0.05
KnChR-3.0-EYFP	0.4	4	2	0.035
KnChR-3.0-EYFP	0.4	4	3	0.005
KnChR-3.0-EYFP	0.4	4	4	0.035
KnChR-3.0-EYFP	0.4	4	5	0.005
KnChR-3.0-EYFP	0.4	4	6	0.065
KnChR-3.0-EYFP	0.2	4	7	0.05
KnChR-3.0-EYFP	0.2	4	8	0.097
KnChR-3.0-EYFP	0.2	4	9	0.005
KnChR-3.0-EYFP	0.2	4	10	0.05
KnChR-3.0-EYFP	0.2	4	11	0.06
KnChR-3.0-EYFP	0.2	4	12	0.08
KnChR-3.0-EYFP	0.1	4	13	0.09
KnChR-3.0-EYFP	0.1	4	14	0.06
KnChR-3.0-EYFP	0.1	4	15	0.11
KnChR-3.0-EYFP	0.1	4	16	0.09
KnChR-3.0-EYFP	0.1	4	17	0.14
KnChR-3.0-EYFP	0.1	4	18	0.11
KnChR-3.0-EYFP	0.4	5	1	0.005
KnChR-3.0-EYFP	0.4	5	2	0.05
KnChR-3.0-EYFP	0.4	5	3	0.035
KnChR-3.0-EYFP	0.4	5	4	0.04
KnChR-3.0-EYFP	0.4	5	5	0.06
KnChR-3.0-EYFP	0.4	5	6	0.035
KnChR-3.0-EYFP	0.2	5	7	0.035
KnChR-3.0-EYFP	0.2	5	8	0.035
KnChR-3.0-EYFP	0.2	5	9	0.02
KnChR-3.0-EYFP	0.2	5	10	0.065
KnChR-3.0-EYFP	0.2	5	11	0.065
KnChR-3.0-EYFP	0.2	5	12	0.065
KnChR-3.0-EYFP	0.1	5	13	0.08
KnChR-3.0-EYFP	0.1	5	14	0.11
KnChR-3.0-EYFP	0.1	5	15	0.09
KnChR-3.0-EYFP	0.1	5	16	0.11
KnChR-3.0-EYFP	0.1	5	17	0.09
KnChR-3.0-EYFP	0.1	5	18	0.14
KnChR-3.0-EYFP	0.4	6	1	0.05
KnChR-3.0-EYFP	0.4	6	2	0.005
KnChR-3.0-EYFP	0.4	6	3	0.005
KnChR-3.0-EYFP	0.4	6	4	0.005
KnChR-3.0-EYFP	0.4	6	5	0.035
KnChR-3.0-EYFP	0.4	6	6	0.065
KnChR-3.0-EYFP	0.2	6	7	0.065
KnChR-3.0-EYFP	0.2	6	8	0.035
KnChR-3.0-EYFP	0.2	6	9	0.12
KnChR-3.0-EYFP	0.2	6	10	0.155
KnChR-3.0-EYFP	0.2	6	11	0.05
KnChR-3.0-EYFP	0.2	6	12	0.09
KnChR-3.0-EYFP	0.1	6	13	0.08
KnChR-3.0-EYFP	0.1	6	14	0.08
KnChR-3.0-EYFP	0.1	6	15	0.08
KnChR-3.0-EYFP	0.1	6	16	0.035
KnChR-3.0-EYFP	0.1	6	17	0.095
KnChR-3.0-EYFP	0.1	6	18	0.05
CrChR2[T159C]-mcherry	0.4	1	2	0.03
CrChR2[T159C]-mcherry	0.4	1	3	0.03
CrChR2[T159C]-mcherry	0.4	1	4	0.03
CrChR2[T159C]-mcherry	0.4	1	5	0.05
CrChR2[T159C]-mcherry	0.4	1	6	0.05
CrChR2[T159C]-mcherry	0.2	1	7	0.05
CrChR2[T159C]-mcherry	0.2	1	8	0.06
CrChR2[T159C]-mcherry	0.2	1	9	0.23
CrChR2[T159C]-mcherry	0.2	1	11	0.02
CrChR2[T159C]-mcherry	0.1	1	13	0.14
CrChR2[T159C]-mcherry	0.1	1	14	0.06
CrChR2[T159C]-mcherry	0.1	1	15	0.02
CrChR2[T159C]-mcherry	0.1	1	16	0.05
CrChR2[T159C]-mcherry	0.1	1	17	0.155
CrChR2[T159C]-mcherry	0.1	1	18	0.08
CrChR2[T159C]-mcherry	0.4	2	1	0.06
CrChR2[T159C]-mcherry	0.4	2	2	0.125
CrChR2[T159C]-mcherry	0.4	2	3	0.05
CrChR2[T159C]-mcherry	0.4	2	4	0.005
CrChR2[T159C]-mcherry	0.4	2	5	0.06
CrChR2[T159C]-mcherry	0.4	2	6	0.07
CrChR2[T159C]-mcherry	0.2	2	7	0.15
CrChR2[T159C]-mcherry	0.2	2	8	0.09
CrChR2[T159C]-mcherry	0.2	2	9	0.1
CrChR2[T159C]-mcherry	0.2	2	10	0.08
CrChR2[T159C]-mcherry	0.2	2	11	0.08
CrChR2[T159C]-mcherry	0.4	3	1	0.09
CrChR2[T159C]-mcherry	0.4	3	2	0.03
CrChR2[T159C]-mcherry	0.4	3	3	0.02
CrChR2[T159C]-mcherry	0.4	3	4	0.12
CrChR2[T159C]-mcherry	0.4	3	6	0.06
CrChR2[T159C]-mcherry	0.2	3	7	0.15
CrChR2[T159C]-mcherry	0.2	3	8	1.4
CrChR2[T159C]-mcherry	0.2	3	9	0.2
CrChR2[T159C]-mcherry	0.2	3	10	0.14
CrChR2[T159C]-mcherry	0.2	3	11	0.22
CrChR2[T159C]-mcherry	0.2	3	12	0.22
CrChR2[T159C]-mcherry	0.1	3	16	0.45
CrChR2[T159C]-mcherry	0.1	3	17	0.5
CrChR2[T159C]-mcherry	0.1	3	18	0.27
CrChR2[T159C]-mcherry	0.4	4	1	0.06
CrChR2[T159C]-mcherry	0.4	4	2	0.04
CrChR2[T159C]-mcherry	0.4	4	6	0.125
CrChR2[T159C]-mcherry	0.2	4	7	0.2
CrChR2[T159C]-mcherry	0.2	4	9	1.73
CrChR2[T159C]-mcherry	0.1	4	16	0.185
CrChR2[T159C]-mcherry	0.4	5	1	0.005
CrChR2[T159C]-mcherry	0.4	5	2	0.02
CrChR2[T159C]-mcherry	0.4	5	3	0.05
CrChR2[T159C]-mcherry	0.4	5	5	0.08
CrChR2[T159C]-mcherry	0.4	5	6	0.065
CrChR2[T159C]-mcherry	0.2	5	7	0.06
CrChR2[T159C]-mcherry	0.2	5	8	0.138
CrChR2[T159C]-mcherry	0.2	5	9	0.13
CrChR2[T159C]-mcherry	0.2	5	10	0.125
CrChR2[T159C]-mcherry	0.2	5	11	0.14
CrChR2[T159C]-mcherry	0.2	5	12	0.05
CrChR2[T159C]-mcherry	0.1	5	18	1.97

## Sheet: C
Line	light intensity	sample	trial	duration
GtCCR4-3.0-EYFP	0.4	1	1	1.03
GtCCR4-3.0-EYFP	0.4	1	2	0.25
GtCCR4-3.0-EYFP	0.4	1	3	0.405
GtCCR4-3.0-EYFP	0.4	1	4	0.315
GtCCR4-3.0-EYFP	0.4	1	5	0.299
GtCCR4-3.0-EYFP	0.4	1	6	0.255
GtCCR4-3.0-EYFP	0.4	2	1	0.63
GtCCR4-3.0-EYFP	0.4	2	3	0.615
GtCCR4-3.0-EYFP	0.4	2	5	0.68
GtCCR4-3.0-EYFP	0.4	3	1	0.78
GtCCR4-3.0-EYFP	0.4	3	2	0.36
GtCCR4-3.0-EYFP	0.4	3	3	0.51
GtCCR4-3.0-EYFP	0.4	3	4	0.435
GtCCR4-3.0-EYFP	0.4	3	5	0.33
GtCCR4-3.0-EYFP	0.4	3	6	0.3
GtCCR4-3.0-EYFP	0.4	4	1	0.37
GtCCR4-3.0-EYFP	0.4	4	2	0.49
GtCCR4-3.0-EYFP	0.4	4	3	0.42
GtCCR4-3.0-EYFP	0.4	4	6	0.53
GtCCR4-3.0-EYFP	0.2	4	8	0.22
GtCCR4-3.0-EYFP	0.2	4	11	0.47
GtCCR4-3.0-EYFP	0.1	4	18	0.69
GtCCR4-3.0-EYFP	0.4	5	1	0.06
GtCCR4-3.0-EYFP	0.4	5	2	0.44
GtCCR4-3.0-EYFP	0.4	5	5	0.57
GtCCR4-3.0-EYFP	0.4	5	6	0.7
GtCCR4-3.0-EYFP	0.4	6	1	0.36
GtCCR4-3.0-EYFP	0.4	6	2	0.26
GtCCR4-3.0-EYFP	0.4	6	5	0.48
GtCCR4-3.0-EYFP	0.2	6	7	0.39
GtCCR4-3.0-EYFP	0.2	6	8	0.31
KnChR-3.0-EYFP	0.4	1	1	0.31
KnChR-3.0-EYFP	0.4	1	2	0.375
KnChR-3.0-EYFP	0.4	1	3	0.415
KnChR-3.0-EYFP	0.4	1	4	1.725
KnChR-3.0-EYFP	0.4	1	5	0.7
KnChR-3.0-EYFP	0.4	1	6	0.61
KnChR-3.0-EYFP	0.2	1	7	1.34
KnChR-3.0-EYFP	0.2	1	8	1
KnChR-3.0-EYFP	0.2	1	9	1.24
KnChR-3.0-EYFP	0.2	1	10	1.34
KnChR-3.0-EYFP	0.2	1	11	1
KnChR-3.0-EYFP	0.2	1	12	2.37
KnChR-3.0-EYFP	0.1	1	13	0.704
KnChR-3.0-EYFP	0.1	1	14	0.75
KnChR-3.0-EYFP	0.1	1	15	0.69
KnChR-3.0-EYFP	0.1	1	16	1.468
KnChR-3.0-EYFP	0.1	1	17	0.93
KnChR-3.0-EYFP	0.1	1	18	1.53
KnChR-3.0-EYFP	0.4	2	1	0.61
KnChR-3.0-EYFP	0.4	2	2	0.63
KnChR-3.0-EYFP	0.4	2	3	0.85
KnChR-3.0-EYFP	0.4	2	4	0.475
KnChR-3.0-EYFP	0.4	2	5	0.829
KnChR-3.0-EYFP	0.4	2	6	6.343
KnChR-3.0-EYFP	0.2	2	7	0.355
KnChR-3.0-EYFP	0.2	2	8	0.21
KnChR-3.0-EYFP	0.2	2	9	0.38
KnChR-3.0-EYFP	0.2	2	10	0.3
KnChR-3.0-EYFP	0.2	2	11	0.38
KnChR-3.0-EYFP	0.2	2	12	0.36
KnChR-3.0-EYFP	0.1	2	13	0.37
KnChR-3.0-EYFP	0.1	2	14	0.39
KnChR-3.0-EYFP	0.1	2	15	0.48
KnChR-3.0-EYFP	0.1	2	16	0.949
KnChR-3.0-EYFP	0.1	2	17	0.15
KnChR-3.0-EYFP	0.1	2	18	0.33
KnChR-3.0-EYFP	0.4	3	1	0.41
KnChR-3.0-EYFP	0.4	3	2	0.23
KnChR-3.0-EYFP	0.4	3	3	0.42
KnChR-3.0-EYFP	0.4	3	4	0.33
KnChR-3.0-EYFP	0.4	3	5	0.68
KnChR-3.0-EYFP	0.4	3	6	0.355
KnChR-3.0-EYFP	0.2	3	7	0.385
KnChR-3.0-EYFP	0.2	3	8	0.39
KnChR-3.0-EYFP	0.2	3	9	0.23
KnChR-3.0-EYFP	0.2	3	10	0.44
KnChR-3.0-EYFP	0.2	3	11	0.305
KnChR-3.0-EYFP	0.2	3	12	0.3
KnChR-3.0-EYFP	0.1	3	13	0.27
KnChR-3.0-EYFP	0.1	3	14	0.44
KnChR-3.0-EYFP	0.1	3	15	0.365
KnChR-3.0-EYFP	0.1	3	16	0.55
KnChR-3.0-EYFP	0.1	3	17	0.31
KnChR-3.0-EYFP	0.1	3	18	0.21
KnChR-3.0-EYFP	0.4	4	1	0.48
KnChR-3.0-EYFP	0.4	4	2	0.449
KnChR-3.0-EYFP	0.4	4	3	0.375
KnChR-3.0-EYFP	0.4	4	4	0.405
KnChR-3.0-EYFP	0.4	4	5	0.425
KnChR-3.0-EYFP	0.4	4	6	0.645
KnChR-3.0-EYFP	0.2	4	7	0.39
KnChR-3.0-EYFP	0.2	4	8	0.225
KnChR-3.0-EYFP	0.2	4	9	0.295
KnChR-3.0-EYFP	0.2	4	10	0.36
KnChR-3.0-EYFP	0.2	4	11	0.3
KnChR-3.0-EYFP	0.2	4	12	0.31
KnChR-3.0-EYFP	0.1	4	13	0.29
KnChR-3.0-EYFP	0.1	4	14	0.31
KnChR-3.0-EYFP	0.1	4	15	0.57
KnChR-3.0-EYFP	0.1	4	16	0.6
KnChR-3.0-EYFP	0.1	4	17	0.96
KnChR-3.0-EYFP	0.1	4	18	0.79
KnChR-3.0-EYFP	0.4	5	1	0.659
KnChR-3.0-EYFP	0.4	5	2	0.44
KnChR-3.0-EYFP	0.4	5	3	0.445
KnChR-3.0-EYFP	0.4	5	4	0.49
KnChR-3.0-EYFP	0.4	5	5	0.47
KnChR-3.0-EYFP	0.4	5	6	0.42
KnChR-3.0-EYFP	0.2	5	7	0.345
KnChR-3.0-EYFP	0.2	5	8	0.435
KnChR-3.0-EYFP	0.2	5	9	0.39
KnChR-3.0-EYFP	0.2	5	10	0.435
KnChR-3.0-EYFP	0.2	5	11	0.315
KnChR-3.0-EYFP	0.2	5	12	0.345
KnChR-3.0-EYFP	0.1	5	13	0.479
KnChR-3.0-EYFP	0.1	5	14	0.42
KnChR-3.0-EYFP	0.1	5	15	0.54
KnChR-3.0-EYFP	0.1	5	16	0.67
KnChR-3.0-EYFP	0.1	5	17	0.7
KnChR-3.0-EYFP	0.1	5	18	0.72
KnChR-3.0-EYFP	0.4	6	1	0.47
KnChR-3.0-EYFP	0.4	6	2	0.595
KnChR-3.0-EYFP	0.4	6	3	0.445
KnChR-3.0-EYFP	0.4	6	4	0.365
KnChR-3.0-EYFP	0.4	6	5	0.315
KnChR-3.0-EYFP	0.4	6	6	0.389
KnChR-3.0-EYFP	0.2	6	7	0.494
KnChR-3.0-EYFP	0.2	6	8	0.345
KnChR-3.0-EYFP	0.2	6	9	0.39
KnChR-3.0-EYFP	0.2	6	10	0.625
KnChR-3.0-EYFP	0.2	6	11	0.24
KnChR-3.0-EYFP	0.2	6	12	0.56
KnChR-3.0-EYFP	0.1	6	13	0.57
KnChR-3.0-EYFP	0.1	6	14	0.55
KnChR-3.0-EYFP	0.1	6	15	0.285
KnChR-3.0-EYFP	0.1	6	16	0.555
KnChR-3.0-EYFP	0.1	6	17	0.295
KnChR-3.0-EYFP	0.1	6	18	0.38
CrChR2[T159C]-mcherry	0.4	1	2	0.37
CrChR2[T159C]-mcherry	0.4	1	3	20.87
CrChR2[T159C]-mcherry	0.4	1	4	19.67
CrChR2[T159C]-mcherry	0.4	1	5	11.37
CrChR2[T159C]-mcherry	0.4	1	6	18.75
CrChR2[T159C]-mcherry	0.2	1	7	0.74
CrChR2[T159C]-mcherry	0.2	1	8	0.14
CrChR2[T159C]-mcherry	0.2	1	9	1.39
CrChR2[T159C]-mcherry	0.2	1	11	1.9
CrChR2[T159C]-mcherry	0.1	1	13	0.3
CrChR2[T159C]-mcherry	0.1	1	14	0.38
CrChR2[T159C]-mcherry	0.1	1	15	0.1
CrChR2[T159C]-mcherry	0.1	1	16	0.36
CrChR2[T159C]-mcherry	0.1	1	17	0.175
CrChR2[T159C]-mcherry	0.1	1	18	0.32
CrChR2[T159C]-mcherry	0.4	2	1	0.529
CrChR2[T159C]-mcherry	0.4	2	2	0.535
CrChR2[T159C]-mcherry	0.4	2	3	0.585
CrChR2[T159C]-mcherry	0.4	2	4	0.565
CrChR2[T159C]-mcherry	0.4	2	5	0.49
CrChR2[T159C]-mcherry	0.4	2	6	1.02
CrChR2[T159C]-mcherry	0.2	2	7	0.53
CrChR2[T159C]-mcherry	0.2	2	8	0.39
CrChR2[T159C]-mcherry	0.2	2	9	0.414
CrChR2[T159C]-mcherry	0.2	2	10	0.509
CrChR2[T159C]-mcherry	0.2	2	11	0.62
CrChR2[T159C]-mcherry	0.4	3	1	0.81
CrChR2[T159C]-mcherry	0.4	3	2	0.63
CrChR2[T159C]-mcherry	0.4	3	3	0.869
CrChR2[T159C]-mcherry	0.4	3	4	0.47
CrChR2[T159C]-mcherry	0.4	3	6	1.8
CrChR2[T159C]-mcherry	0.2	3	7	0.79
CrChR2[T159C]-mcherry	0.2	3	8	0.95
CrChR2[T159C]-mcherry	0.2	3	9	0.74
CrChR2[T159C]-mcherry	0.2	3	10	0.7
CrChR2[T159C]-mcherry	0.2	3	11	0.59
CrChR2[T159C]-mcherry	0.2	3	12	0.8
CrChR2[T159C]-mcherry	0.1	3	16	0.95
CrChR2[T159C]-mcherry	0.1	3	17	0.9
CrChR2[T159C]-mcherry	0.1	3	18	0.68
CrChR2[T159C]-mcherry	0.4	4	1	1.68
CrChR2[T159C]-mcherry	0.4	4	2	2.81
CrChR2[T159C]-mcherry	0.4	4	6	3.355
CrChR2[T159C]-mcherry	0.2	4	7	0.24
CrChR2[T159C]-mcherry	0.2	4	9	0.34
CrChR2[T159C]-mcherry	0.1	4	16	0.584
CrChR2[T159C]-mcherry	0.4	5	1	0.659
CrChR2[T159C]-mcherry	0.4	5	2	10.78
CrChR2[T159C]-mcherry	0.4	5	3	0.494
CrChR2[T159C]-mcherry	0.4	5	5	0.39
CrChR2[T159C]-mcherry	0.4	5	6	0.009
CrChR2[T159C]-mcherry	0.2	5	7	0.499
CrChR2[T159C]-mcherry	0.2	5	8	0.812
CrChR2[T159C]-mcherry	0.2	5	9	0.68
CrChR2[T159C]-mcherry	0.2	5	10	0.235
CrChR2[T159C]-mcherry	0.2	5	11	1.2
CrChR2[T159C]-mcherry	0.2	5	12	0.82
CrChR2[T159C]-mcherry	0.1	5	18	0.33
