# Supplementary material for: Optogenetic manipulation of neuronal and cardiomyocyte functions in zebrafish using microbial rhodopsins and adenylyl cyclases
Source: eLife. 2023 Aug 17;12:e83975. doi: 10.7554/eLife.83975 (PMC10435232; doi:10.7554/eLife.83975)
Supplement: Figure 3—source data 1. [file elife-83975-fig3-data1.xlsx]

## Sheet: A
Line	Tg(UAS-opto-tool) or control	sample number	trial number	yes:tail was moved not counted: tail was moved before the light no: tail was not moved
GtCCR4-3.0-EYFP	Tg(UAS-opto-tool)	1	1	not counted
GtCCR4-3.0-EYFP	Tg(UAS-opto-tool)	1	2	not counted
GtCCR4-3.0-EYFP	Tg(UAS-opto-tool)	1	3	no
GtCCR4-3.0-EYFP	Tg(UAS-opto-tool)	1	4	yes
GtCCR4-3.0-EYFP	Tg(UAS-opto-tool)	1	5	no
GtCCR4-3.0-EYFP	Tg(UAS-opto-tool)	1	6	yes
GtCCR4-3.0-EYFP	Tg(UAS-opto-tool)	2	1	yes
GtCCR4-3.0-EYFP	Tg(UAS-opto-tool)	2	2	yes
GtCCR4-3.0-EYFP	Tg(UAS-opto-tool)	2	3	yes
GtCCR4-3.0-EYFP	Tg(UAS-opto-tool)	2	4	yes
GtCCR4-3.0-EYFP	Tg(UAS-opto-tool)	2	5	yes
GtCCR4-3.0-EYFP	Tg(UAS-opto-tool)	2	6	yes
GtCCR4-3.0-EYFP	Tg(UAS-opto-tool)	3	1	yes
GtCCR4-3.0-EYFP	Tg(UAS-opto-tool)	3	2	no
GtCCR4-3.0-EYFP	Tg(UAS-opto-tool)	3	3	no
GtCCR4-3.0-EYFP	Tg(UAS-opto-tool)	3	4	no
GtCCR4-3.0-EYFP	Tg(UAS-opto-tool)	3	5	no
GtCCR4-3.0-EYFP	Tg(UAS-opto-tool)	3	6	yes
GtCCR4-3.0-EYFP	Tg(UAS-opto-tool)	4	1	yes
GtCCR4-3.0-EYFP	Tg(UAS-opto-tool)	4	2	yes
GtCCR4-3.0-EYFP	Tg(UAS-opto-tool)	4	3	no
GtCCR4-3.0-EYFP	Tg(UAS-opto-tool)	4	4	yes
GtCCR4-3.0-EYFP	Tg(UAS-opto-tool)	4	5	yes
GtCCR4-3.0-EYFP	Tg(UAS-opto-tool)	4	6	yes
GtCCR4-3.0-EYFP	Tg(UAS-opto-tool)	5	1	not counted
GtCCR4-3.0-EYFP	Tg(UAS-opto-tool)	5	2	yes
GtCCR4-3.0-EYFP	Tg(UAS-opto-tool)	5	3	no
GtCCR4-3.0-EYFP	Tg(UAS-opto-tool)	5	4	yes
GtCCR4-3.0-EYFP	Tg(UAS-opto-tool)	5	5	not counted
GtCCR4-3.0-EYFP	Tg(UAS-opto-tool)	5	6	no
GtCCR4-3.0-EYFP	Tg(UAS-opto-tool)	6	1	yes
GtCCR4-3.0-EYFP	Tg(UAS-opto-tool)	6	2	no
GtCCR4-3.0-EYFP	Tg(UAS-opto-tool)	6	3	no
GtCCR4-3.0-EYFP	Tg(UAS-opto-tool)	6	4	yes
GtCCR4-3.0-EYFP	Tg(UAS-opto-tool)	6	5	yes
GtCCR4-3.0-EYFP	Tg(UAS-opto-tool)	6	6	yes
GtCCR4-3.0-EYFP	Tg(UAS-opto-tool)	7	1	yes
GtCCR4-3.0-EYFP	Tg(UAS-opto-tool)	7	2	yes
GtCCR4-3.0-EYFP	Tg(UAS-opto-tool)	7	3	no
GtCCR4-3.0-EYFP	Tg(UAS-opto-tool)	7	4	yes
GtCCR4-3.0-EYFP	Tg(UAS-opto-tool)	7	5	yes
GtCCR4-3.0-EYFP	Tg(UAS-opto-tool)	7	6	yes
GtCCR4-3.0-EYFP	Tg(UAS-opto-tool)	8	1	no
GtCCR4-3.0-EYFP	Tg(UAS-opto-tool)	8	2	no
GtCCR4-3.0-EYFP	Tg(UAS-opto-tool)	8	3	no
GtCCR4-3.0-EYFP	Tg(UAS-opto-tool)	8	4	no
GtCCR4-3.0-EYFP	Tg(UAS-opto-tool)	8	5	yes
GtCCR4-3.0-EYFP	Tg(UAS-opto-tool)	8	6	yes
GtCCR4-3.0-EYFP	control	1	1	no
GtCCR4-3.0-EYFP	control	1	2	no
GtCCR4-3.0-EYFP	control	1	3	no
GtCCR4-3.0-EYFP	control	1	4	no
GtCCR4-3.0-EYFP	control	1	5	no
GtCCR4-3.0-EYFP	control	1	6	no
GtCCR4-3.0-EYFP	control	2	1	no
GtCCR4-3.0-EYFP	control	2	2	no
GtCCR4-3.0-EYFP	control	2	3	no
GtCCR4-3.0-EYFP	control	2	4	no
GtCCR4-3.0-EYFP	control	2	5	no
GtCCR4-3.0-EYFP	control	2	6	yes
GtCCR4-3.0-EYFP	control	3	1	no
GtCCR4-3.0-EYFP	control	3	2	no
GtCCR4-3.0-EYFP	control	3	3	no
GtCCR4-3.0-EYFP	control	3	4	no
GtCCR4-3.0-EYFP	control	3	5	no
GtCCR4-3.0-EYFP	control	3	6	yes
GtCCR4-3.0-EYFP	control	4	1	no
GtCCR4-3.0-EYFP	control	4	2	no
GtCCR4-3.0-EYFP	control	4	3	no
GtCCR4-3.0-EYFP	control	4	4	no
GtCCR4-3.0-EYFP	control	4	5	no
GtCCR4-3.0-EYFP	control	4	6	no
GtCCR4-3.0-EYFP	control	5	1	no
GtCCR4-3.0-EYFP	control	5	2	no
GtCCR4-3.0-EYFP	control	5	3	no
GtCCR4-3.0-EYFP	control	5	4	no
GtCCR4-3.0-EYFP	control	5	5	yes
GtCCR4-3.0-EYFP	control	5	6	no
GtCCR4-3.0-EYFP	control	6	1	no
GtCCR4-3.0-EYFP	control	6	2	no
GtCCR4-3.0-EYFP	control	6	3	yes
GtCCR4-3.0-EYFP	control	6	4	no
GtCCR4-3.0-EYFP	control	6	5	no
GtCCR4-3.0-EYFP	control	6	6	yes
GtCCR4-3.0-EYFP	control	7	1	no
GtCCR4-3.0-EYFP	control	7	2	no
GtCCR4-3.0-EYFP	control	7	3	no
GtCCR4-3.0-EYFP	control	7	4	no
GtCCR4-3.0-EYFP	control	7	5	no
GtCCR4-3.0-EYFP	control	7	6	no
GtCCR4-3.0-EYFP	control	8	1	no
GtCCR4-3.0-EYFP	control	8	2	no
GtCCR4-3.0-EYFP	control	8	3	no
GtCCR4-3.0-EYFP	control	8	4	yes
GtCCR4-3.0-EYFP	control	8	5	yes
GtCCR4-3.0-EYFP	control	8	6	no
GtCCR4-MT	Tg(UAS-opto-tool)	1	1	no
GtCCR4-MT	Tg(UAS-opto-tool)	1	1	no
GtCCR4-MT	Tg(UAS-opto-tool)	1	1	no
GtCCR4-MT	Tg(UAS-opto-tool)	1	1	yes
GtCCR4-MT	Tg(UAS-opto-tool)	1	1	yes
GtCCR4-MT	Tg(UAS-opto-tool)	1	1	no
GtCCR4-MT	Tg(UAS-opto-tool)	2	1	yes
GtCCR4-MT	Tg(UAS-opto-tool)	2	1	no
GtCCR4-MT	Tg(UAS-opto-tool)	2	1	yes
GtCCR4-MT	Tg(UAS-opto-tool)	2	1	no
GtCCR4-MT	Tg(UAS-opto-tool)	2	1	no
GtCCR4-MT	Tg(UAS-opto-tool)	2	1	yes
GtCCR4-MT	Tg(UAS-opto-tool)	3	1	yes
GtCCR4-MT	Tg(UAS-opto-tool)	3	1	no
GtCCR4-MT	Tg(UAS-opto-tool)	3	1	no
GtCCR4-MT	Tg(UAS-opto-tool)	3	1	no
GtCCR4-MT	Tg(UAS-opto-tool)	3	1	yes
GtCCR4-MT	Tg(UAS-opto-tool)	3	1	yes
GtCCR4-MT	Tg(UAS-opto-tool)	4	1	no
GtCCR4-MT	Tg(UAS-opto-tool)	4	1	no
GtCCR4-MT	Tg(UAS-opto-tool)	4	1	yes
GtCCR4-MT	Tg(UAS-opto-tool)	4	1	no
GtCCR4-MT	Tg(UAS-opto-tool)	4	1	no
GtCCR4-MT	Tg(UAS-opto-tool)	4	1	yes
GtCCR4-MT	Tg(UAS-opto-tool)	5	1	no
GtCCR4-MT	Tg(UAS-opto-tool)	5	1	no
GtCCR4-MT	Tg(UAS-opto-tool)	5	1	no
GtCCR4-MT	Tg(UAS-opto-tool)	5	1	yes
GtCCR4-MT	Tg(UAS-opto-tool)	5	1	no
GtCCR4-MT	Tg(UAS-opto-tool)	5	1	no
GtCCR4-MT	Tg(UAS-opto-tool)	6	1	no
GtCCR4-MT	Tg(UAS-opto-tool)	6	1	yes
GtCCR4-MT	Tg(UAS-opto-tool)	6	1	yes
GtCCR4-MT	Tg(UAS-opto-tool)	6	1	no
GtCCR4-MT	Tg(UAS-opto-tool)	6	1	no
GtCCR4-MT	Tg(UAS-opto-tool)	6	1	yes
GtCCR4-MT	Tg(UAS-opto-tool)	7	1	yes
GtCCR4-MT	Tg(UAS-opto-tool)	7	1	yes
GtCCR4-MT	Tg(UAS-opto-tool)	7	1	yes
GtCCR4-MT	Tg(UAS-opto-tool)	7	1	yes
GtCCR4-MT	Tg(UAS-opto-tool)	7	1	yes
GtCCR4-MT	Tg(UAS-opto-tool)	7	1	yes
GtCCR4-MT	Tg(UAS-opto-tool)	8	1	no
GtCCR4-MT	Tg(UAS-opto-tool)	8	1	yes
GtCCR4-MT	Tg(UAS-opto-tool)	8	1	no
GtCCR4-MT	Tg(UAS-opto-tool)	8	1	yes
GtCCR4-MT	Tg(UAS-opto-tool)	8	1	yes
GtCCR4-MT	Tg(UAS-opto-tool)	8	1	yes
GtCCR4-MT	control	1	1	no
GtCCR4-MT	control	1	2	no
GtCCR4-MT	control	1	3	no
GtCCR4-MT	control	1	4	no
GtCCR4-MT	control	1	5	no
GtCCR4-MT	control	1	6	no
GtCCR4-MT	control	2	1	not counted
GtCCR4-MT	control	2	2	no
GtCCR4-MT	control	2	3	no
GtCCR4-MT	control	2	4	no
GtCCR4-MT	control	2	5	no
GtCCR4-MT	control	2	6	no
GtCCR4-MT	control	3	1	no
GtCCR4-MT	control	3	2	no
GtCCR4-MT	control	3	3	no
GtCCR4-MT	control	3	4	no
GtCCR4-MT	control	3	5	no
GtCCR4-MT	control	3	6	yes
GtCCR4-MT	control	4	1	no
GtCCR4-MT	control	4	2	no
GtCCR4-MT	control	4	3	no
GtCCR4-MT	control	4	4	no
GtCCR4-MT	control	4	5	no
GtCCR4-MT	control	4	6	no
GtCCR4-MT	control	5	1	no
GtCCR4-MT	control	5	2	no
GtCCR4-MT	control	5	3	yes
GtCCR4-MT	control	5	4	no
GtCCR4-MT	control	5	5	no
GtCCR4-MT	control	5	6	no
GtCCR4-MT	control	6	1	no
GtCCR4-MT	control	6	2	no
GtCCR4-MT	control	6	3	no
GtCCR4-MT	control	6	4	no
GtCCR4-MT	control	6	5	no
GtCCR4-MT	control	6	6	no
GtCCR4-MT	control	7	1	no
GtCCR4-MT	control	7	2	yes
GtCCR4-MT	control	7	3	no
GtCCR4-MT	control	7	4	yes
GtCCR4-MT	control	7	5	no
GtCCR4-MT	control	7	6	no
GtCCR4-MT	control	8	1	no
GtCCR4-MT	control	8	2	no
GtCCR4-MT	control	8	3	no
GtCCR4-MT	control	8	4	no
GtCCR4-MT	control	8	5	no
GtCCR4-MT	control	8	6	no
KnChR-3.0-EYFP	Tg(UAS-opto-tool)	1	1	not counted
KnChR-3.0-EYFP	Tg(UAS-opto-tool)	1	2	yes
KnChR-3.0-EYFP	Tg(UAS-opto-tool)	1	3	not counted
KnChR-3.0-EYFP	Tg(UAS-opto-tool)	1	4	yes
KnChR-3.0-EYFP	Tg(UAS-opto-tool)	1	5	yes
KnChR-3.0-EYFP	Tg(UAS-opto-tool)	1	6	yes
KnChR-3.0-EYFP	Tg(UAS-opto-tool)	2	1	not counted
KnChR-3.0-EYFP	Tg(UAS-opto-tool)	2	2	yes
KnChR-3.0-EYFP	Tg(UAS-opto-tool)	2	3	yes
KnChR-3.0-EYFP	Tg(UAS-opto-tool)	2	4	yes
KnChR-3.0-EYFP	Tg(UAS-opto-tool)	2	5	yes
KnChR-3.0-EYFP	Tg(UAS-opto-tool)	2	6	not counted
KnChR-3.0-EYFP	Tg(UAS-opto-tool)	3	1	yes
KnChR-3.0-EYFP	Tg(UAS-opto-tool)	3	2	yes
KnChR-3.0-EYFP	Tg(UAS-opto-tool)	3	3	not counted
KnChR-3.0-EYFP	Tg(UAS-opto-tool)	3	4	not counted
KnChR-3.0-EYFP	Tg(UAS-opto-tool)	3	5	yes
KnChR-3.0-EYFP	Tg(UAS-opto-tool)	3	6	not counted
KnChR-3.0-EYFP	Tg(UAS-opto-tool)	4	1	yes
KnChR-3.0-EYFP	Tg(UAS-opto-tool)	4	2	not counted
KnChR-3.0-EYFP	Tg(UAS-opto-tool)	4	3	yes
KnChR-3.0-EYFP	Tg(UAS-opto-tool)	4	4	not counted
KnChR-3.0-EYFP	Tg(UAS-opto-tool)	4	5	not counted
KnChR-3.0-EYFP	Tg(UAS-opto-tool)	4	6	not counted
KnChR-3.0-EYFP	Tg(UAS-opto-tool)	5	1	not counted
KnChR-3.0-EYFP	Tg(UAS-opto-tool)	5	2	yes
KnChR-3.0-EYFP	Tg(UAS-opto-tool)	5	3	yes
KnChR-3.0-EYFP	Tg(UAS-opto-tool)	5	4	not counted
KnChR-3.0-EYFP	Tg(UAS-opto-tool)	5	5	not counted
KnChR-3.0-EYFP	Tg(UAS-opto-tool)	5	6	yes
KnChR-3.0-EYFP	Tg(UAS-opto-tool)	6	1	not counted
KnChR-3.0-EYFP	Tg(UAS-opto-tool)	6	2	not counted
KnChR-3.0-EYFP	Tg(UAS-opto-tool)	6	3	not counted
KnChR-3.0-EYFP	Tg(UAS-opto-tool)	6	4	not counted
KnChR-3.0-EYFP	Tg(UAS-opto-tool)	6	5	not counted
KnChR-3.0-EYFP	Tg(UAS-opto-tool)	6	6	yes
KnChR-3.0-EYFP	Tg(UAS-opto-tool)	7	1	yes
KnChR-3.0-EYFP	Tg(UAS-opto-tool)	7	2	yes
KnChR-3.0-EYFP	Tg(UAS-opto-tool)	7	3	not counted
KnChR-3.0-EYFP	Tg(UAS-opto-tool)	7	4	not counted
KnChR-3.0-EYFP	Tg(UAS-opto-tool)	7	5	not counted
KnChR-3.0-EYFP	Tg(UAS-opto-tool)	7	6	yes
KnChR-3.0-EYFP	Tg(UAS-opto-tool)	8	1	yes
KnChR-3.0-EYFP	Tg(UAS-opto-tool)	8	2	yes
KnChR-3.0-EYFP	Tg(UAS-opto-tool)	8	3	yes
KnChR-3.0-EYFP	Tg(UAS-opto-tool)	8	4	yes
KnChR-3.0-EYFP	Tg(UAS-opto-tool)	8	5	not counted
KnChR-3.0-EYFP	Tg(UAS-opto-tool)	8	6	yes
KnChR-3.0-EYFP	control	1	1	no
KnChR-3.0-EYFP	control	1	2	no
KnChR-3.0-EYFP	control	1	3	yes
KnChR-3.0-EYFP	control	1	4	no
KnChR-3.0-EYFP	control	1	5	yes
KnChR-3.0-EYFP	control	1	6	no
KnChR-3.0-EYFP	control	2	1	no
KnChR-3.0-EYFP	control	2	2	no
KnChR-3.0-EYFP	control	2	3	no
KnChR-3.0-EYFP	control	2	4	no
KnChR-3.0-EYFP	control	2	5	no
KnChR-3.0-EYFP	control	2	6	no
KnChR-3.0-EYFP	control	3	1	no
KnChR-3.0-EYFP	control	3	2	no
KnChR-3.0-EYFP	control	3	3	no
KnChR-3.0-EYFP	control	3	4	no
KnChR-3.0-EYFP	control	3	5	no
KnChR-3.0-EYFP	control	3	6	no
KnChR-3.0-EYFP	control	4	1	no
KnChR-3.0-EYFP	control	4	2	no
KnChR-3.0-EYFP	control	4	3	no
KnChR-3.0-EYFP	control	4	4	no
KnChR-3.0-EYFP	control	4	5	no
KnChR-3.0-EYFP	control	4	6	no
KnChR-3.0-EYFP	control	5	1	no
KnChR-3.0-EYFP	control	5	2	yes
KnChR-3.0-EYFP	control	5	3	no
KnChR-3.0-EYFP	control	5	4	no
KnChR-3.0-EYFP	control	5	5	no
KnChR-3.0-EYFP	control	5	6	yes
KnChR-3.0-EYFP	control	6	1	no
KnChR-3.0-EYFP	control	6	2	no
KnChR-3.0-EYFP	control	6	3	no
KnChR-3.0-EYFP	control	6	4	no
KnChR-3.0-EYFP	control	6	5	no
KnChR-3.0-EYFP	control	6	6	no
KnChR-3.0-EYFP	control	7	1	no
KnChR-3.0-EYFP	control	7	2	no
KnChR-3.0-EYFP	control	7	3	no
KnChR-3.0-EYFP	control	7	4	no
KnChR-3.0-EYFP	control	7	5	no
KnChR-3.0-EYFP	control	7	6	no
KnChR-3.0-EYFP	control	8	1	no
KnChR-3.0-EYFP	control	8	2	no
KnChR-3.0-EYFP	control	8	3	no
KnChR-3.0-EYFP	control	8	4	no
KnChR-3.0-EYFP	control	8	5	no
KnChR-3.0-EYFP	control	8	6	no
CrChR2[T159C]-mcherry	Tg(UAS-opto-tool)	1	1	not counted
CrChR2[T159C]-mcherry	Tg(UAS-opto-tool)	1	2	not counted
CrChR2[T159C]-mcherry	Tg(UAS-opto-tool)	1	3	not counted
CrChR2[T159C]-mcherry	Tg(UAS-opto-tool)	1	4	yes
CrChR2[T159C]-mcherry	Tg(UAS-opto-tool)	1	5	yes
CrChR2[T159C]-mcherry	Tg(UAS-opto-tool)	1	6	yes
CrChR2[T159C]-mcherry	Tg(UAS-opto-tool)	2	1	no
CrChR2[T159C]-mcherry	Tg(UAS-opto-tool)	2	2	no
CrChR2[T159C]-mcherry	Tg(UAS-opto-tool)	2	3	no
CrChR2[T159C]-mcherry	Tg(UAS-opto-tool)	2	4	no
CrChR2[T159C]-mcherry	Tg(UAS-opto-tool)	2	5	not counted
CrChR2[T159C]-mcherry	Tg(UAS-opto-tool)	2	6	no
CrChR2[T159C]-mcherry	Tg(UAS-opto-tool)	3	1	no
CrChR2[T159C]-mcherry	Tg(UAS-opto-tool)	3	2	yes
CrChR2[T159C]-mcherry	Tg(UAS-opto-tool)	3	3	yes
CrChR2[T159C]-mcherry	Tg(UAS-opto-tool)	3	4	no
CrChR2[T159C]-mcherry	Tg(UAS-opto-tool)	3	5	yes
CrChR2[T159C]-mcherry	Tg(UAS-opto-tool)	3	6	yes
CrChR2[T159C]-mcherry	Tg(UAS-opto-tool)	4	1	no
CrChR2[T159C]-mcherry	Tg(UAS-opto-tool)	4	2	no
CrChR2[T159C]-mcherry	Tg(UAS-opto-tool)	4	3	no
CrChR2[T159C]-mcherry	Tg(UAS-opto-tool)	4	4	no
CrChR2[T159C]-mcherry	Tg(UAS-opto-tool)	4	5	no
CrChR2[T159C]-mcherry	Tg(UAS-opto-tool)	4	6	no
CrChR2[T159C]-mcherry	Tg(UAS-opto-tool)	5	1	no
CrChR2[T159C]-mcherry	Tg(UAS-opto-tool)	5	2	no
CrChR2[T159C]-mcherry	Tg(UAS-opto-tool)	5	3	yes
CrChR2[T159C]-mcherry	Tg(UAS-opto-tool)	5	4	yes
CrChR2[T159C]-mcherry	Tg(UAS-opto-tool)	5	5	yes
CrChR2[T159C]-mcherry	Tg(UAS-opto-tool)	5	6	no
CrChR2[T159C]-mcherry	Tg(UAS-opto-tool)	6	1	yes
CrChR2[T159C]-mcherry	Tg(UAS-opto-tool)	6	2	no
CrChR2[T159C]-mcherry	Tg(UAS-opto-tool)	6	3	no
CrChR2[T159C]-mcherry	Tg(UAS-opto-tool)	6	4	no
CrChR2[T159C]-mcherry	Tg(UAS-opto-tool)	6	5	no
CrChR2[T159C]-mcherry	Tg(UAS-opto-tool)	6	6	no
CrChR2[T159C]-mcherry	Tg(UAS-opto-tool)	7	1	yes
CrChR2[T159C]-mcherry	Tg(UAS-opto-tool)	7	2	yes
CrChR2[T159C]-mcherry	Tg(UAS-opto-tool)	7	3	not counted
CrChR2[T159C]-mcherry	Tg(UAS-opto-tool)	7	4	not counted
CrChR2[T159C]-mcherry	Tg(UAS-opto-tool)	7	5	no
CrChR2[T159C]-mcherry	Tg(UAS-opto-tool)	7	6	yes
CrChR2[T159C]-mcherry	Tg(UAS-opto-tool)	8	1	not counted
CrChR2[T159C]-mcherry	Tg(UAS-opto-tool)	8	2	not counted
CrChR2[T159C]-mcherry	Tg(UAS-opto-tool)	8	3	yes
CrChR2[T159C]-mcherry	Tg(UAS-opto-tool)	8	4	yes
CrChR2[T159C]-mcherry	Tg(UAS-opto-tool)	8	5	yes
CrChR2[T159C]-mcherry	Tg(UAS-opto-tool)	8	6	yes
CrChR2[T159C]-mcherry	Tg(UAS-opto-tool)	9	1	yes
CrChR2[T159C]-mcherry	Tg(UAS-opto-tool)	9	2	yes
CrChR2[T159C]-mcherry	Tg(UAS-opto-tool)	9	3	not counted
CrChR2[T159C]-mcherry	Tg(UAS-opto-tool)	9	4	not counted
CrChR2[T159C]-mcherry	Tg(UAS-opto-tool)	9	5	yes
CrChR2[T159C]-mcherry	Tg(UAS-opto-tool)	9	6	yes
CrChR2[T159C]-mcherry	Tg(UAS-opto-tool)	10	1	yes
CrChR2[T159C]-mcherry	Tg(UAS-opto-tool)	10	2	yes
CrChR2[T159C]-mcherry	Tg(UAS-opto-tool)	10	3	yes
CrChR2[T159C]-mcherry	Tg(UAS-opto-tool)	10	4	yes
CrChR2[T159C]-mcherry	Tg(UAS-opto-tool)	10	5	yes
CrChR2[T159C]-mcherry	Tg(UAS-opto-tool)	10	6	yes
CrChR2[T159C]-mcherry	Tg(UAS-opto-tool)	11	1	yes
CrChR2[T159C]-mcherry	Tg(UAS-opto-tool)	11	2	yes
CrChR2[T159C]-mcherry	Tg(UAS-opto-tool)	11	3	yes
CrChR2[T159C]-mcherry	Tg(UAS-opto-tool)	11	4	yes
CrChR2[T159C]-mcherry	Tg(UAS-opto-tool)	11	5	yes
CrChR2[T159C]-mcherry	Tg(UAS-opto-tool)	11	6	yes
CrChR2[T159C]-mcherry	Tg(UAS-opto-tool)	12	1	yes
CrChR2[T159C]-mcherry	Tg(UAS-opto-tool)	12	2	yes
CrChR2[T159C]-mcherry	Tg(UAS-opto-tool)	12	3	yes
CrChR2[T159C]-mcherry	Tg(UAS-opto-tool)	12	4	yes
CrChR2[T159C]-mcherry	Tg(UAS-opto-tool)	12	5	yes
CrChR2[T159C]-mcherry	Tg(UAS-opto-tool)	12	6	not counted
CrChR2[T159C]-mcherry	control	1	1	no
CrChR2[T159C]-mcherry	control	1	2	no
CrChR2[T159C]-mcherry	control	1	3	no
CrChR2[T159C]-mcherry	control	1	4	no
CrChR2[T159C]-mcherry	control	1	5	yes
CrChR2[T159C]-mcherry	control	1	6	no
CrChR2[T159C]-mcherry	control	2	1	no
CrChR2[T159C]-mcherry	control	2	2	no
CrChR2[T159C]-mcherry	control	2	3	not counted
CrChR2[T159C]-mcherry	control	2	4	not counted
CrChR2[T159C]-mcherry	control	2	5	yes
CrChR2[T159C]-mcherry	control	2	6	yes
CrChR2[T159C]-mcherry	control	3	1	no
CrChR2[T159C]-mcherry	control	3	2	no
CrChR2[T159C]-mcherry	control	3	3	no
CrChR2[T159C]-mcherry	control	3	4	no
CrChR2[T159C]-mcherry	control	3	5	no
CrChR2[T159C]-mcherry	control	3	6	not counted
CrChR2[T159C]-mcherry	control	4	1	yes
CrChR2[T159C]-mcherry	control	4	2	no
CrChR2[T159C]-mcherry	control	4	3	no
CrChR2[T159C]-mcherry	control	4	4	not counted
CrChR2[T159C]-mcherry	control	4	5	yes
CrChR2[T159C]-mcherry	control	4	6	no
CrChR2[T159C]-mcherry	control	5	1	yes
CrChR2[T159C]-mcherry	control	5	2	not counted
CrChR2[T159C]-mcherry	control	5	3	no
CrChR2[T159C]-mcherry	control	5	4	no
CrChR2[T159C]-mcherry	control	5	5	yes
CrChR2[T159C]-mcherry	control	5	6	yes
CrChR2[T159C]-mcherry	control	6	1	no
CrChR2[T159C]-mcherry	control	6	2	no
CrChR2[T159C]-mcherry	control	6	3	yes
CrChR2[T159C]-mcherry	control	6	4	no
CrChR2[T159C]-mcherry	control	6	5	yes
CrChR2[T159C]-mcherry	control	6	6	no
CrChR2[T159C]-mcherry	control	7	1	no
CrChR2[T159C]-mcherry	control	7	2	not counted
CrChR2[T159C]-mcherry	control	7	3	no
CrChR2[T159C]-mcherry	control	7	4	not counted
CrChR2[T159C]-mcherry	control	7	5	no
CrChR2[T159C]-mcherry	control	7	6	no
CrChR2[T159C]-mcherry	control	8	1	no
CrChR2[T159C]-mcherry	control	8	2	no
CrChR2[T159C]-mcherry	control	8	3	no
CrChR2[T159C]-mcherry	control	8	4	no
CrChR2[T159C]-mcherry	control	8	5	no
CrChR2[T159C]-mcherry	control	8	6	not counted

## Sheet: B
Line	sample number	trial number	latency
GtCCR4-3.0-EYFP	1	4	0.01
GtCCR4-3.0-EYFP	1	6	0.24
GtCCR4-3.0-EYFP	2	1	1.2
GtCCR4-3.0-EYFP	2	2	0.1
GtCCR4-3.0-EYFP	2	3	2.9
GtCCR4-3.0-EYFP	2	4	2.8
GtCCR4-3.0-EYFP	2	5	3.06
GtCCR4-3.0-EYFP	2	6	0.05
GtCCR4-3.0-EYFP	3	1	3.63
GtCCR4-3.0-EYFP	3	6	1.06
GtCCR4-3.0-EYFP	4	1	1.19
GtCCR4-3.0-EYFP	4	2	0.1
GtCCR4-3.0-EYFP	4	4	0.095
GtCCR4-3.0-EYFP	4	5	0.095
GtCCR4-3.0-EYFP	4	6	0.02
GtCCR4-3.0-EYFP	5	2	0.08
GtCCR4-3.0-EYFP	5	4	0.21
GtCCR4-3.0-EYFP	6	1	0.155
GtCCR4-3.0-EYFP	6	4	1.324
GtCCR4-3.0-EYFP	6	5	0.125
GtCCR4-3.0-EYFP	6	6	2.942
GtCCR4-3.0-EYFP	7	1	3.4
GtCCR4-3.0-EYFP	7	2	4.38
GtCCR4-3.0-EYFP	7	4	0.15
GtCCR4-3.0-EYFP	7	5	0.12
GtCCR4-3.0-EYFP	7	6	4.08
GtCCR4-3.0-EYFP	8	5	6.77
GtCCR4-3.0-EYFP	8	6	2.32
GtCCR4-MT	1	4	0.245
GtCCR4-MT	1	5	0.38
GtCCR4-MT	2	1	2.867
GtCCR4-MT	2	3	1.024
GtCCR4-MT	2	6	2.313
GtCCR4-MT	3	1	0.964
GtCCR4-MT	3	5	0.065
GtCCR4-MT	3	6	0.05
GtCCR4-MT	4	3	1.383
GtCCR4-MT	4	6	4.71
GtCCR4-MT	5	4	0.514
GtCCR4-MT	6	2	5.234
GtCCR4-MT	6	3	2.283
GtCCR4-MT	6	6	0.829
GtCCR4-MT	7	1	0.14
GtCCR4-MT	7	2	0.125
GtCCR4-MT	7	3	0.065
GtCCR4-MT	7	4	0.02
GtCCR4-MT	7	5	0.035
GtCCR4-MT	7	6	0.095
GtCCR4-MT	8	2	0.095
GtCCR4-MT	8	4	0.095
GtCCR4-MT	8	5	0.11
GtCCR4-MT	8	6	0.11
KnChR-3.0-EYFP	1	2	0.007
KnChR-3.0-EYFP	1	4	0.007
KnChR-3.0-EYFP	1	5	0.052
KnChR-3.0-EYFP	1	6	0.007
KnChR-3.0-EYFP	2	2	0.037
KnChR-3.0-EYFP	2	3	0.022
KnChR-3.0-EYFP	2	4	0.007
KnChR-3.0-EYFP	2	5	0.022
KnChR-3.0-EYFP	3	1	0.007
KnChR-3.0-EYFP	3	2	0.037
KnChR-3.0-EYFP	3	5	0.037
KnChR-3.0-EYFP	4	1	0.037
KnChR-3.0-EYFP	4	3	0.022
KnChR-3.0-EYFP	5	2	0.007
KnChR-3.0-EYFP	5	3	0
KnChR-3.0-EYFP	5	6	0
KnChR-3.0-EYFP	6	6	0.007
KnChR-3.0-EYFP	7	1	0.067
KnChR-3.0-EYFP	7	2	0
KnChR-3.0-EYFP	7	6	0.007
KnChR-3.0-EYFP	8	1	0.022
KnChR-3.0-EYFP	8	2	0.022
KnChR-3.0-EYFP	8	3	0.052
KnChR-3.0-EYFP	8	4	0.037
KnChR-3.0-EYFP	8	6	0.007
CrChR2[T159C]-mcherry	1	4	0.005
CrChR2[T159C]-mcherry	1	5	0.05
CrChR2[T159C]-mcherry	1	6	0.005
CrChR2[T159C]-mcherry	3	2	0.16
CrChR2[T159C]-mcherry	3	3	0.08
CrChR2[T159C]-mcherry	3	5	0.2
CrChR2[T159C]-mcherry	3	6	0.19
CrChR2[T159C]-mcherry	5	3	0.08
CrChR2[T159C]-mcherry	5	4	0
CrChR2[T159C]-mcherry	5	5	0.02
CrChR2[T159C]-mcherry	6	1	0.13
CrChR2[T159C]-mcherry	7	1	0.19
CrChR2[T159C]-mcherry	7	2	0.08
CrChR2[T159C]-mcherry	7	6	0.01
CrChR2[T159C]-mcherry	8	3	0.05
CrChR2[T159C]-mcherry	8	4	0.28
CrChR2[T159C]-mcherry	8	5	0.08
CrChR2[T159C]-mcherry	8	6	0.47
CrChR2[T159C]-mcherry	9	1	0.1
CrChR2[T159C]-mcherry	9	2	0.08
CrChR2[T159C]-mcherry	9	5	0.02
CrChR2[T159C]-mcherry	9	6	0.02
CrChR2[T159C]-mcherry	10	1	0.08
CrChR2[T159C]-mcherry	10	2	0.02
CrChR2[T159C]-mcherry	10	3	0.02
CrChR2[T159C]-mcherry	10	4	0.05
CrChR2[T159C]-mcherry	10	5	0.02
CrChR2[T159C]-mcherry	10	6	0.05
CrChR2[T159C]-mcherry	11	1	0
CrChR2[T159C]-mcherry	11	2	0.08
CrChR2[T159C]-mcherry	11	3	0
CrChR2[T159C]-mcherry	11	4	0.05
CrChR2[T159C]-mcherry	11	5	0.01
CrChR2[T159C]-mcherry	11	6	0.11
CrChR2[T159C]-mcherry	12	1	0.04
CrChR2[T159C]-mcherry	12	2	0.01
CrChR2[T159C]-mcherry	12	3	0.05
CrChR2[T159C]-mcherry	12	4	0
CrChR2[T159C]-mcherry	12	5	0

## Sheet: C
Line	sample number	trial number	duration
GtCCR4-3.0-EYFP	1	4	0.19
GtCCR4-3.0-EYFP	1	6	0.08
GtCCR4-3.0-EYFP	2	1	0.5
GtCCR4-3.0-EYFP	2	2	0.17
GtCCR4-3.0-EYFP	2	3	0.19
GtCCR4-3.0-EYFP	2	4	0.173
GtCCR4-3.0-EYFP	2	5	0.21
GtCCR4-3.0-EYFP	2	6	0.25
GtCCR4-3.0-EYFP	3	1	0.37
GtCCR4-3.0-EYFP	3	6	0.24
GtCCR4-3.0-EYFP	4	1	0.763
GtCCR4-3.0-EYFP	4	2	0.22
GtCCR4-3.0-EYFP	4	4	0.12
GtCCR4-3.0-EYFP	4	5	0.227
GtCCR4-3.0-EYFP	4	6	0.44
GtCCR4-3.0-EYFP	5	2	0.69
GtCCR4-3.0-EYFP	5	4	0.36
GtCCR4-3.0-EYFP	6	1	1.274
GtCCR4-3.0-EYFP	6	4	0.246
GtCCR4-3.0-EYFP	6	5	1.625
GtCCR4-3.0-EYFP	6	6	0.468
GtCCR4-3.0-EYFP	7	1	4.59
GtCCR4-3.0-EYFP	7	2	3.03
GtCCR4-3.0-EYFP	7	4	1.86
GtCCR4-3.0-EYFP	7	5	0.23
GtCCR4-3.0-EYFP	7	6	2.44
GtCCR4-3.0-EYFP	8	5	0.81
GtCCR4-3.0-EYFP	8	6	0.56
GtCCR4-MT	1	4	0.029
GtCCR4-MT	1	5	0.899
GtCCR4-MT	2	1	0.51
GtCCR4-MT	2	3	0.42
GtCCR4-MT	2	6	1.184
GtCCR4-MT	3	1	0.809
GtCCR4-MT	3	5	3.851
GtCCR4-MT	3	6	3.057
GtCCR4-MT	4	3	0.06
GtCCR4-MT	4	6	0.509
GtCCR4-MT	5	4	1.334
GtCCR4-MT	6	2	0.959
GtCCR4-MT	6	3	2.382
GtCCR4-MT	6	6	1.169
GtCCR4-MT	7	1	0.689
GtCCR4-MT	7	2	1.288
GtCCR4-MT	7	3	0.854
GtCCR4-MT	7	4	0.824
GtCCR4-MT	7	5	2.068
GtCCR4-MT	7	6	2.922
GtCCR4-MT	8	2	2.712
GtCCR4-MT	8	4	4.825
GtCCR4-MT	8	5	3.401
GtCCR4-MT	8	6	4.225
KnChR-3.0-EYFP	1	2	0.525
KnChR-3.0-EYFP	1	4	0.6
KnChR-3.0-EYFP	1	5	0.6
KnChR-3.0-EYFP	1	6	0.69
KnChR-3.0-EYFP	2	2	0.944
KnChR-3.0-EYFP	2	3	0.809
KnChR-3.0-EYFP	2	4	1.544
KnChR-3.0-EYFP	2	5	1.289
KnChR-3.0-EYFP	3	1	0.42
KnChR-3.0-EYFP	3	2	0.585
KnChR-3.0-EYFP	3	5	0.794
KnChR-3.0-EYFP	4	1	0.33
KnChR-3.0-EYFP	4	3	0.599
KnChR-3.0-EYFP	5	2	0.54
KnChR-3.0-EYFP	5	3	0.592
KnChR-3.0-EYFP	5	6	0.861
KnChR-3.0-EYFP	6	6	0.6
KnChR-3.0-EYFP	7	1	0.39
KnChR-3.0-EYFP	7	2	0.487
KnChR-3.0-EYFP	7	6	0.734
KnChR-3.0-EYFP	8	1	0.39
KnChR-3.0-EYFP	8	2	0.63
KnChR-3.0-EYFP	8	3	0.765
KnChR-3.0-EYFP	8	4	0.72
KnChR-3.0-EYFP	8	6	0.839
CrChR2[T159C]-mcherry	1	4	1.379
CrChR2[T159C]-mcherry	1	5	0.539
CrChR2[T159C]-mcherry	1	6	1.798
CrChR2[T159C]-mcherry	3	2	0.44
CrChR2[T159C]-mcherry	3	3	0.48
CrChR2[T159C]-mcherry	3	5	0.52
CrChR2[T159C]-mcherry	3	6	0.58
CrChR2[T159C]-mcherry	5	3	0.37
CrChR2[T159C]-mcherry	5	4	0.38
CrChR2[T159C]-mcherry	5	5	0.18
CrChR2[T159C]-mcherry	6	1	7.98
CrChR2[T159C]-mcherry	7	1	1.05
CrChR2[T159C]-mcherry	7	2	0.44
CrChR2[T159C]-mcherry	7	6	0.92
CrChR2[T159C]-mcherry	8	3	3.06
CrChR2[T159C]-mcherry	8	4	1.93
CrChR2[T159C]-mcherry	8	5	2.25
CrChR2[T159C]-mcherry	8	6	1.59
CrChR2[T159C]-mcherry	9	1	0.28
CrChR2[T159C]-mcherry	9	2	0.66
CrChR2[T159C]-mcherry	9	5	1.81
CrChR2[T159C]-mcherry	9	6	1.39
CrChR2[T159C]-mcherry	10	1	0.24
CrChR2[T159C]-mcherry	10	2	0.45
CrChR2[T159C]-mcherry	10	3	0.45
CrChR2[T159C]-mcherry	10	4	1.06
CrChR2[T159C]-mcherry	10	5	0.66
CrChR2[T159C]-mcherry	10	6	1.01
CrChR2[T159C]-mcherry	11	1	0.1
CrChR2[T159C]-mcherry	11	2	0.32
CrChR2[T159C]-mcherry	11	3	0.19
CrChR2[T159C]-mcherry	11	4	0.36
CrChR2[T159C]-mcherry	11	5	0.3
CrChR2[T159C]-mcherry	11	6	0.33
CrChR2[T159C]-mcherry	12	1	0.39
CrChR2[T159C]-mcherry	12	2	0.43
CrChR2[T159C]-mcherry	12	3	0.41
CrChR2[T159C]-mcherry	12	4	0.19
CrChR2[T159C]-mcherry	12	5	0.13

## Sheet: D
Line	sample number	trial number	strength
GtCCR4-3.0-EYFP	1	4	2.47171
GtCCR4-3.0-EYFP	1	6	1.65934
GtCCR4-3.0-EYFP	2	1	1.55055
GtCCR4-3.0-EYFP	2	2	2.07136
GtCCR4-3.0-EYFP	2	3	2.48689
GtCCR4-3.0-EYFP	2	4	2.00611
GtCCR4-3.0-EYFP	2	5	3.37688
GtCCR4-3.0-EYFP	2	6	1.85947
GtCCR4-3.0-EYFP	3	1	2.09285
GtCCR4-3.0-EYFP	3	6	2.61982
GtCCR4-3.0-EYFP	4	1	4.04545
GtCCR4-3.0-EYFP	4	2	0.218318
GtCCR4-3.0-EYFP	4	4	0.691729
GtCCR4-3.0-EYFP	4	5	1.33922
GtCCR4-3.0-EYFP	4	6	0.666377
GtCCR4-3.0-EYFP	5	2	3.52992
GtCCR4-3.0-EYFP	5	4	2.26416
GtCCR4-3.0-EYFP	6	1	4.00251
GtCCR4-3.0-EYFP	6	4	2.58007
GtCCR4-3.0-EYFP	6	5	4.01253
GtCCR4-3.0-EYFP	6	6	1.84962
GtCCR4-3.0-EYFP	7	1	3.89671
GtCCR4-3.0-EYFP	7	2	3.25629
GtCCR4-3.0-EYFP	7	4	3.26086
GtCCR4-3.0-EYFP	7	5	0.432158
GtCCR4-3.0-EYFP	7	6	3.15908
GtCCR4-3.0-EYFP	8	5	4.07738
GtCCR4-3.0-EYFP	8	6	1.80415
GtCCR4-MT	1	4	0.468914
GtCCR4-MT	1	5	0.737647
GtCCR4-MT	2	1	0.901857
GtCCR4-MT	2	3	0.880684
GtCCR4-MT	2	6	0.239442
GtCCR4-MT	3	1	0.21444
GtCCR4-MT	3	5	1.07687
GtCCR4-MT	3	6	1.08964
GtCCR4-MT	4	3	0.272274
GtCCR4-MT	4	6	0.854086
GtCCR4-MT	5	4	0.309896
GtCCR4-MT	6	2	0.859325
GtCCR4-MT	6	3	0.324576
GtCCR4-MT	6	6	0.226695
GtCCR4-MT	7	1	0.194444
GtCCR4-MT	7	2	0.268167
GtCCR4-MT	7	3	0.241646
GtCCR4-MT	7	4	0.305685
GtCCR4-MT	7	5	1.00194
GtCCR4-MT	7	6	0.429771
GtCCR4-MT	8	2	0.277126
GtCCR4-MT	8	4	1.2881
GtCCR4-MT	8	5	1.26386
GtCCR4-MT	8	6	1.2311
KnChR-3.0-EYFP	1	2	0.895354
KnChR-3.0-EYFP	1	4	0.927015
KnChR-3.0-EYFP	1	5	0.908367
KnChR-3.0-EYFP	1	6	0.874126
KnChR-3.0-EYFP	2	2	0.869048
KnChR-3.0-EYFP	2	3	0.909744
KnChR-3.0-EYFP	2	4	1.00398
KnChR-3.0-EYFP	2	5	0.96008
KnChR-3.0-EYFP	3	1	0.912713
KnChR-3.0-EYFP	3	2	1.04305
KnChR-3.0-EYFP	3	5	1.0314
KnChR-3.0-EYFP	4	1	1.02735
KnChR-3.0-EYFP	4	3	1.01715
KnChR-3.0-EYFP	5	2	0.989141
KnChR-3.0-EYFP	5	3	0.969526
KnChR-3.0-EYFP	5	6	0.94968
KnChR-3.0-EYFP	6	6	0.80328
KnChR-3.0-EYFP	7	1	0.429672
KnChR-3.0-EYFP	7	2	0.988571
KnChR-3.0-EYFP	7	6	1.04952
KnChR-3.0-EYFP	8	1	1.02947
KnChR-3.0-EYFP	8	2	1.08851
KnChR-3.0-EYFP	8	3	1.09793
KnChR-3.0-EYFP	8	4	1.11516
KnChR-3.0-EYFP	8	6	1.05693
CrChR2[T159C]-mcherry	1	4	0.418603
CrChR2[T159C]-mcherry	1	5	0.346523
CrChR2[T159C]-mcherry	1	6	0.467334
CrChR2[T159C]-mcherry	3	2	0.282908
CrChR2[T159C]-mcherry	3	3	0.225989
CrChR2[T159C]-mcherry	3	5	0.249077
CrChR2[T159C]-mcherry	3	6	0.303538
CrChR2[T159C]-mcherry	5	3	0.867621
CrChR2[T159C]-mcherry	5	4	0.628571
CrChR2[T159C]-mcherry	5	5	0.237117
CrChR2[T159C]-mcherry	6	1	0.22686
CrChR2[T159C]-mcherry	7	1	0.974053
CrChR2[T159C]-mcherry	7	2	0.47864
CrChR2[T159C]-mcherry	7	6	0.322618
CrChR2[T159C]-mcherry	8	3	0.357142
CrChR2[T159C]-mcherry	8	4	0.447755
CrChR2[T159C]-mcherry	8	5	0.283257
CrChR2[T159C]-mcherry	8	6	0.317772
CrChR2[T159C]-mcherry	9	1	0.540517
CrChR2[T159C]-mcherry	9	2	1.01126
CrChR2[T159C]-mcherry	9	5	0.25768
CrChR2[T159C]-mcherry	9	6	0.302737
CrChR2[T159C]-mcherry	10	1	0.110556
CrChR2[T159C]-mcherry	10	2	0.300853
CrChR2[T159C]-mcherry	10	3	0.635592
CrChR2[T159C]-mcherry	10	4	0.395976
CrChR2[T159C]-mcherry	10	5	0.38065
CrChR2[T159C]-mcherry	10	6	0.506932
CrChR2[T159C]-mcherry	11	1	0.284198
CrChR2[T159C]-mcherry	11	2	0.0617573
CrChR2[T159C]-mcherry	11	3	0.98268
CrChR2[T159C]-mcherry	11	4	0.0938902
CrChR2[T159C]-mcherry	11	5	0.774162
CrChR2[T159C]-mcherry	11	6	0.100463
CrChR2[T159C]-mcherry	12	1	0.835106
CrChR2[T159C]-mcherry	12	2	0.799278
CrChR2[T159C]-mcherry	12	3	0.76847
CrChR2[T159C]-mcherry	12	4	0.972932
CrChR2[T159C]-mcherry	12	5	0.398603

## Sheet: E
Line	light intensity(mW/mm2)	sample number	trial number	yes:tail was moved not counted: tail was moved before the light no: tail was not moved
GtCCR4-3.0-EYFP	0.4	1	1	yes
GtCCR4-3.0-EYFP	0.4	1	2	yes
GtCCR4-3.0-EYFP	0.4	1	3	yes
GtCCR4-3.0-EYFP	0.4	1	4	yes
GtCCR4-3.0-EYFP	0.4	1	5	yes
GtCCR4-3.0-EYFP	0.4	1	6	yes
GtCCR4-3.0-EYFP	0.2	1	7	no
GtCCR4-3.0-EYFP	0.2	1	8	no
GtCCR4-3.0-EYFP	0.2	1	9	no
GtCCR4-3.0-EYFP	0.2	1	10	no
GtCCR4-3.0-EYFP	0.2	1	11	no
GtCCR4-3.0-EYFP	0.2	1	12	no
GtCCR4-3.0-EYFP	0.1	1	13	no
GtCCR4-3.0-EYFP	0.1	1	14	no
GtCCR4-3.0-EYFP	0.1	1	15	no
GtCCR4-3.0-EYFP	0.1	1	16	no
GtCCR4-3.0-EYFP	0.1	1	17	no
GtCCR4-3.0-EYFP	0.1	1	18	no
GtCCR4-3.0-EYFP	0.4	2	1	yes
GtCCR4-3.0-EYFP	0.4	2	2	no
GtCCR4-3.0-EYFP	0.4	2	3	yes
GtCCR4-3.0-EYFP	0.4	2	4	no
GtCCR4-3.0-EYFP	0.4	2	5	yes
GtCCR4-3.0-EYFP	0.4	2	6	no
GtCCR4-3.0-EYFP	0.2	2	7	no
GtCCR4-3.0-EYFP	0.2	2	8	no
GtCCR4-3.0-EYFP	0.2	2	9	no
GtCCR4-3.0-EYFP	0.2	2	10	no
GtCCR4-3.0-EYFP	0.2	2	11	no
GtCCR4-3.0-EYFP	0.2	2	12	no
GtCCR4-3.0-EYFP	0.1	2	13	no
GtCCR4-3.0-EYFP	0.1	2	14	no
GtCCR4-3.0-EYFP	0.1	2	15	no
GtCCR4-3.0-EYFP	0.1	2	16	no
GtCCR4-3.0-EYFP	0.1	2	17	no
GtCCR4-3.0-EYFP	0.1	2	18	no
GtCCR4-3.0-EYFP	0.4	3	1	yes
GtCCR4-3.0-EYFP	0.4	3	2	yes
GtCCR4-3.0-EYFP	0.4	3	3	yes
GtCCR4-3.0-EYFP	0.4	3	4	yes
GtCCR4-3.0-EYFP	0.4	3	5	yes
GtCCR4-3.0-EYFP	0.4	3	6	yes
GtCCR4-3.0-EYFP	0.2	3	7	no
GtCCR4-3.0-EYFP	0.2	3	8	no
GtCCR4-3.0-EYFP	0.2	3	9	no
GtCCR4-3.0-EYFP	0.2	3	10	no
GtCCR4-3.0-EYFP	0.2	3	11	no
GtCCR4-3.0-EYFP	0.2	3	12	no
GtCCR4-3.0-EYFP	0.1	3	13	no
GtCCR4-3.0-EYFP	0.1	3	14	no
GtCCR4-3.0-EYFP	0.1	3	15	no
GtCCR4-3.0-EYFP	0.1	3	16	no
GtCCR4-3.0-EYFP	0.1	3	17	no
GtCCR4-3.0-EYFP	0.1	3	18	no
GtCCR4-3.0-EYFP	0.4	4	1	yes
GtCCR4-3.0-EYFP	0.4	4	2	yes
GtCCR4-3.0-EYFP	0.4	4	3	yes
GtCCR4-3.0-EYFP	0.4	4	4	no
GtCCR4-3.0-EYFP	0.4	4	5	no
GtCCR4-3.0-EYFP	0.4	4	6	yes
GtCCR4-3.0-EYFP	0.2	4	7	no
GtCCR4-3.0-EYFP	0.2	4	8	yes
GtCCR4-3.0-EYFP	0.2	4	9	no
GtCCR4-3.0-EYFP	0.2	4	10	no
GtCCR4-3.0-EYFP	0.2	4	11	yes
GtCCR4-3.0-EYFP	0.2	4	12	no
GtCCR4-3.0-EYFP	0.1	4	13	no
GtCCR4-3.0-EYFP	0.1	4	14	no
GtCCR4-3.0-EYFP	0.1	4	15	no
GtCCR4-3.0-EYFP	0.1	4	16	no
GtCCR4-3.0-EYFP	0.1	4	17	no
GtCCR4-3.0-EYFP	0.1	4	18	yes
GtCCR4-3.0-EYFP	0.4	5	1	yes
GtCCR4-3.0-EYFP	0.4	5	2	yes
GtCCR4-3.0-EYFP	0.4	5	3	no
GtCCR4-3.0-EYFP	0.4	5	4	no
GtCCR4-3.0-EYFP	0.4	5	5	yes
GtCCR4-3.0-EYFP	0.4	5	6	yes
GtCCR4-3.0-EYFP	0.2	5	7	no
GtCCR4-3.0-EYFP	0.2	5	8	no
GtCCR4-3.0-EYFP	0.2	5	9	no
GtCCR4-3.0-EYFP	0.2	5	10	no
GtCCR4-3.0-EYFP	0.2	5	11	no
GtCCR4-3.0-EYFP	0.2	5	12	no
GtCCR4-3.0-EYFP	0.1	5	13	no
GtCCR4-3.0-EYFP	0.1	5	14	no
GtCCR4-3.0-EYFP	0.1	5	15	no
GtCCR4-3.0-EYFP	0.1	5	16	no
GtCCR4-3.0-EYFP	0.1	5	17	no
GtCCR4-3.0-EYFP	0.1	5	18	no
GtCCR4-3.0-EYFP	0.4	6	1	yes
GtCCR4-3.0-EYFP	0.4	6	2	yes
GtCCR4-3.0-EYFP	0.4	6	3	no
GtCCR4-3.0-EYFP	0.4	6	4	no
GtCCR4-3.0-EYFP	0.4	6	5	yes
GtCCR4-3.0-EYFP	0.4	6	6	no
GtCCR4-3.0-EYFP	0.2	6	7	yes
GtCCR4-3.0-EYFP	0.2	6	8	yes
GtCCR4-3.0-EYFP	0.2	6	9	no
GtCCR4-3.0-EYFP	0.2	6	10	no
GtCCR4-3.0-EYFP	0.2	6	11	no
GtCCR4-3.0-EYFP	0.2	6	12	no
GtCCR4-3.0-EYFP	0.1	6	13	no
GtCCR4-3.0-EYFP	0.1	6	14	no
GtCCR4-3.0-EYFP	0.1	6	15	no
GtCCR4-3.0-EYFP	0.1	6	16	no
GtCCR4-3.0-EYFP	0.1	6	17	no
GtCCR4-3.0-EYFP	0.1	6	18	no
KnChR-3.0-EYFP	0.4	1	1	yes
KnChR-3.0-EYFP	0.4	1	2	yes
KnChR-3.0-EYFP	0.4	1	3	yes
KnChR-3.0-EYFP	0.4	1	4	yes
KnChR-3.0-EYFP	0.4	1	5	yes
KnChR-3.0-EYFP	0.4	1	6	yes
KnChR-3.0-EYFP	0.2	1	7	yes
KnChR-3.0-EYFP	0.2	1	8	yes
KnChR-3.0-EYFP	0.2	1	9	yes
KnChR-3.0-EYFP	0.2	1	10	yes
KnChR-3.0-EYFP	0.2	1	11	yes
KnChR-3.0-EYFP	0.2	1	12	yes
KnChR-3.0-EYFP	0.1	1	13	yes
KnChR-3.0-EYFP	0.1	1	14	yes
KnChR-3.0-EYFP	0.1	1	15	yes
KnChR-3.0-EYFP	0.1	1	16	yes
KnChR-3.0-EYFP	0.1	1	17	yes
KnChR-3.0-EYFP	0.1	1	18	yes
KnChR-3.0-EYFP	0.4	2	1	yes
KnChR-3.0-EYFP	0.4	2	2	yes
KnChR-3.0-EYFP	0.4	2	3	yes
KnChR-3.0-EYFP	0.4	2	4	yes
KnChR-3.0-EYFP	0.4	2	5	yes
KnChR-3.0-EYFP	0.4	2	6	yes
KnChR-3.0-EYFP	0.2	2	7	yes
KnChR-3.0-EYFP	0.2	2	8	yes
KnChR-3.0-EYFP	0.2	2	9	yes
KnChR-3.0-EYFP	0.2	2	10	yes
KnChR-3.0-EYFP	0.2	2	11	yes
KnChR-3.0-EYFP	0.2	2	12	yes
KnChR-3.0-EYFP	0.1	2	13	yes
KnChR-3.0-EYFP	0.1	2	14	yes
KnChR-3.0-EYFP	0.1	2	15	yes
KnChR-3.0-EYFP	0.1	2	16	yes
KnChR-3.0-EYFP	0.1	2	17	yes
KnChR-3.0-EYFP	0.1	2	18	yes
KnChR-3.0-EYFP	0.4	3	1	yes
KnChR-3.0-EYFP	0.4	3	2	yes
KnChR-3.0-EYFP	0.4	3	3	yes
KnChR-3.0-EYFP	0.4	3	4	yes
KnChR-3.0-EYFP	0.4	3	5	yes
KnChR-3.0-EYFP	0.4	3	6	yes
KnChR-3.0-EYFP	0.2	3	7	yes
KnChR-3.0-EYFP	0.2	3	8	yes
KnChR-3.0-EYFP	0.2	3	9	yes
KnChR-3.0-EYFP	0.2	3	10	yes
KnChR-3.0-EYFP	0.2	3	11	yes
KnChR-3.0-EYFP	0.2	3	12	yes
KnChR-3.0-EYFP	0.1	3	13	yes
KnChR-3.0-EYFP	0.1	3	14	yes
KnChR-3.0-EYFP	0.1	3	15	yes
KnChR-3.0-EYFP	0.1	3	16	yes
KnChR-3.0-EYFP	0.1	3	17	yes
KnChR-3.0-EYFP	0.1	3	18	yes
KnChR-3.0-EYFP	0.4	4	1	yes
KnChR-3.0-EYFP	0.4	4	2	yes
KnChR-3.0-EYFP	0.4	4	3	yes
KnChR-3.0-EYFP	0.4	4	4	yes
KnChR-3.0-EYFP	0.4	4	5	yes
KnChR-3.0-EYFP	0.4	4	6	yes
KnChR-3.0-EYFP	0.2	4	7	yes
KnChR-3.0-EYFP	0.2	4	8	yes
KnChR-3.0-EYFP	0.2	4	9	yes
KnChR-3.0-EYFP	0.2	4	10	yes
KnChR-3.0-EYFP	0.2	4	11	yes
KnChR-3.0-EYFP	0.2	4	12	yes
KnChR-3.0-EYFP	0.1	4	13	yes
KnChR-3.0-EYFP	0.1	4	14	yes
KnChR-3.0-EYFP	0.1	4	15	yes
KnChR-3.0-EYFP	0.1	4	16	yes
KnChR-3.0-EYFP	0.1	4	17	yes
KnChR-3.0-EYFP	0.1	4	18	yes
KnChR-3.0-EYFP	0.4	5	1	yes
KnChR-3.0-EYFP	0.4	5	2	yes
KnChR-3.0-EYFP	0.4	5	3	yes
KnChR-3.0-EYFP	0.4	5	4	yes
KnChR-3.0-EYFP	0.4	5	5	yes
KnChR-3.0-EYFP	0.4	5	6	yes
KnChR-3.0-EYFP	0.2	5	7	yes
KnChR-3.0-EYFP	0.2	5	8	yes
KnChR-3.0-EYFP	0.2	5	9	yes
KnChR-3.0-EYFP	0.2	5	10	yes
KnChR-3.0-EYFP	0.2	5	11	yes
KnChR-3.0-EYFP	0.2	5	12	yes
KnChR-3.0-EYFP	0.1	5	13	yes
KnChR-3.0-EYFP	0.1	5	14	yes
KnChR-3.0-EYFP	0.1	5	15	yes
KnChR-3.0-EYFP	0.1	5	16	yes
KnChR-3.0-EYFP	0.1	5	17	yes
KnChR-3.0-EYFP	0.1	5	18	yes
KnChR-3.0-EYFP	0.4	6	1	yes
KnChR-3.0-EYFP	0.4	6	2	yes
KnChR-3.0-EYFP	0.4	6	3	yes
KnChR-3.0-EYFP	0.4	6	4	yes
KnChR-3.0-EYFP	0.4	6	5	yes
KnChR-3.0-EYFP	0.4	6	6	yes
KnChR-3.0-EYFP	0.2	6	7	yes
KnChR-3.0-EYFP	0.2	6	8	yes
KnChR-3.0-EYFP	0.2	6	9	yes
KnChR-3.0-EYFP	0.2	6	10	yes
KnChR-3.0-EYFP	0.2	6	11	yes
KnChR-3.0-EYFP	0.2	6	12	yes
KnChR-3.0-EYFP	0.1	6	13	yes
KnChR-3.0-EYFP	0.1	6	14	yes
KnChR-3.0-EYFP	0.1	6	15	yes
KnChR-3.0-EYFP	0.1	6	16	yes
KnChR-3.0-EYFP	0.1	6	17	yes
KnChR-3.0-EYFP	0.1	6	18	yes
CrChR2[T159C]-mcherry	0.4	1	1	not counted
CrChR2[T159C]-mcherry	0.4	1	2	yes
CrChR2[T159C]-mcherry	0.4	1	3	yes
CrChR2[T159C]-mcherry	0.4	1	4	yes
CrChR2[T159C]-mcherry	0.4	1	5	yes
CrChR2[T159C]-mcherry	0.4	1	6	yes
CrChR2[T159C]-mcherry	0.2	1	7	yes
CrChR2[T159C]-mcherry	0.2	1	8	yes
CrChR2[T159C]-mcherry	0.2	1	9	yes
CrChR2[T159C]-mcherry	0.2	1	10	not counted
CrChR2[T159C]-mcherry	0.2	1	11	yes
CrChR2[T159C]-mcherry	0.2	1	12	no
CrChR2[T159C]-mcherry	0.1	1	13	yes
CrChR2[T159C]-mcherry	0.1	1	14	yes
CrChR2[T159C]-mcherry	0.1	1	15	yes
CrChR2[T159C]-mcherry	0.1	1	16	yes
CrChR2[T159C]-mcherry	0.1	1	17	yes
CrChR2[T159C]-mcherry	0.1	1	18	yes
CrChR2[T159C]-mcherry	0.4	2	1	yes
CrChR2[T159C]-mcherry	0.4	2	2	yes
CrChR2[T159C]-mcherry	0.4	2	3	yes
CrChR2[T159C]-mcherry	0.4	2	4	yes
CrChR2[T159C]-mcherry	0.4	2	5	yes
CrChR2[T159C]-mcherry	0.4	2	6	yes
CrChR2[T159C]-mcherry	0.2	2	7	yes
CrChR2[T159C]-mcherry	0.2	2	8	yes
CrChR2[T159C]-mcherry	0.2	2	9	yes
CrChR2[T159C]-mcherry	0.2	2	10	yes
CrChR2[T159C]-mcherry	0.2	2	11	yes
CrChR2[T159C]-mcherry	0.2	2	12	no
CrChR2[T159C]-mcherry	0.1	2	13	no
CrChR2[T159C]-mcherry	0.1	2	14	no
CrChR2[T159C]-mcherry	0.1	2	15	no
CrChR2[T159C]-mcherry	0.1	2	16	no
CrChR2[T159C]-mcherry	0.1	2	17	no
CrChR2[T159C]-mcherry	0.1	2	18	no
CrChR2[T159C]-mcherry	0.4	3	1	yes
CrChR2[T159C]-mcherry	0.4	3	2	yes
CrChR2[T159C]-mcherry	0.4	3	3	yes
CrChR2[T159C]-mcherry	0.4	3	4	yes
CrChR2[T159C]-mcherry	0.4	3	5	not counted
CrChR2[T159C]-mcherry	0.4	3	6	yes
CrChR2[T159C]-mcherry	0.2	3	7	yes
CrChR2[T159C]-mcherry	0.2	3	8	yes
CrChR2[T159C]-mcherry	0.2	3	9	yes
CrChR2[T159C]-mcherry	0.2	3	10	yes
CrChR2[T159C]-mcherry	0.2	3	11	yes
CrChR2[T159C]-mcherry	0.2	3	12	yes
CrChR2[T159C]-mcherry	0.1	3	13	no
CrChR2[T159C]-mcherry	0.1	3	14	no
CrChR2[T159C]-mcherry	0.1	3	15	no
CrChR2[T159C]-mcherry	0.1	3	16	yes
CrChR2[T159C]-mcherry	0.1	3	17	yes
CrChR2[T159C]-mcherry	0.1	3	18	yes
CrChR2[T159C]-mcherry	0.4	4	1	yes
CrChR2[T159C]-mcherry	0.4	4	2	yes
CrChR2[T159C]-mcherry	0.4	4	3	no
CrChR2[T159C]-mcherry	0.4	4	4	not counted
CrChR2[T159C]-mcherry	0.4	4	5	not counted
CrChR2[T159C]-mcherry	0.4	4	6	yes
CrChR2[T159C]-mcherry	0.2	4	7	yes
CrChR2[T159C]-mcherry	0.2	4	8	no
CrChR2[T159C]-mcherry	0.2	4	9	yes
CrChR2[T159C]-mcherry	0.2	4	10	no
CrChR2[T159C]-mcherry	0.2	4	11	no
CrChR2[T159C]-mcherry	0.2	4	12	no
CrChR2[T159C]-mcherry	0.1	4	13	no
CrChR2[T159C]-mcherry	0.1	4	14	no
CrChR2[T159C]-mcherry	0.1	4	15	no
CrChR2[T159C]-mcherry	0.1	4	16	yes
CrChR2[T159C]-mcherry	0.1	4	17	no
CrChR2[T159C]-mcherry	0.1	4	18	no
CrChR2[T159C]-mcherry	0.4	5	1	yes
CrChR2[T159C]-mcherry	0.4	5	2	yes
CrChR2[T159C]-mcherry	0.4	5	3	yes
CrChR2[T159C]-mcherry	0.4	5	4	not counted
CrChR2[T159C]-mcherry	0.4	5	5	yes
CrChR2[T159C]-mcherry	0.4	5	6	yes
CrChR2[T159C]-mcherry	0.2	5	7	yes
CrChR2[T159C]-mcherry	0.2	5	8	yes
CrChR2[T159C]-mcherry	0.2	5	9	yes
CrChR2[T159C]-mcherry	0.2	5	10	yes
CrChR2[T159C]-mcherry	0.2	5	11	yes
CrChR2[T159C]-mcherry	0.2	5	12	yes
CrChR2[T159C]-mcherry	0.1	5	13	no
CrChR2[T159C]-mcherry	0.1	5	14	no
CrChR2[T159C]-mcherry	0.1	5	15	no
CrChR2[T159C]-mcherry	0.1	5	16	no
CrChR2[T159C]-mcherry	0.1	5	17	no
CrChR2[T159C]-mcherry	0.1	5	18	yes
