# Supplementary material for: Optogenetic manipulation of neuronal and cardiomyocyte functions in zebrafish using microbial rhodopsins and adenylyl cyclases
Source: eLife. 2023 Aug 17;12:e83975. doi: 10.7554/eLife.83975 (PMC10435232; doi:10.7554/eLife.83975)
Supplement: Figure 4—source data 1. [file elife-83975-fig4-data1.xlsx]

## Sheet: B
Line	Frame	X	Y
GtCCR4-3.0-EYFP	1	-10	1.02691
GtCCR4-3.0-EYFP	2	-9.98507	1.0118
GtCCR4-3.0-EYFP	3	-9.97015	1.00063
GtCCR4-3.0-EYFP	4	-9.95522	1
GtCCR4-3.0-EYFP	5	-9.9403	0.990667
GtCCR4-3.0-EYFP	6	-9.92537	0.991296
GtCCR4-3.0-EYFP	7	-9.91045	0.975721
GtCCR4-3.0-EYFP	8	-9.89552	0.967361
GtCCR4-3.0-EYFP	9	-9.8806	0.965415
GtCCR4-3.0-EYFP	10	-9.86567	0.96822
GtCCR4-3.0-EYFP	11	-9.85075	0.970797
GtCCR4-3.0-EYFP	12	-9.83582	0.970797
GtCCR4-3.0-EYFP	13	-9.8209	0.976638
GtCCR4-3.0-EYFP	14	-9.80597	0.988376
GtCCR4-3.0-EYFP	15	-9.79104	1.01168
GtCCR4-3.0-EYFP	16	-9.77612	1.02434
GtCCR4-3.0-EYFP	17	-9.76119	1.02405
GtCCR4-3.0-EYFP	18	-9.74627	1.03075
GtCCR4-3.0-EYFP	19	-9.73134	1.02783
GtCCR4-3.0-EYFP	20	-9.71642	1.02067
GtCCR4-3.0-EYFP	21	-9.70149	1.01054
GtCCR4-3.0-EYFP	22	-9.68657	1.00578
GtCCR4-3.0-EYFP	23	-9.67164	1.00212
GtCCR4-3.0-EYFP	24	-9.65672	0.995992
GtCCR4-3.0-EYFP	25	-9.64179	0.991182
GtCCR4-3.0-EYFP	26	-9.62687	0.981161
GtCCR4-3.0-EYFP	27	-9.61194	0.970625
GtCCR4-3.0-EYFP	28	-9.59701	0.971141
GtCCR4-3.0-EYFP	29	-9.58209	0.969881
GtCCR4-3.0-EYFP	30	-9.56716	0.969423
GtCCR4-3.0-EYFP	31	-9.55224	0.968564
GtCCR4-3.0-EYFP	32	-9.53731	0.976237
GtCCR4-3.0-EYFP	33	-9.52239	0.982994
GtCCR4-3.0-EYFP	34	-9.50746	0.996507
GtCCR4-3.0-EYFP	35	-9.49254	1.01563
GtCCR4-3.0-EYFP	36	-9.47761	1.02502
GtCCR4-3.0-EYFP	37	-9.46269	1.03092
GtCCR4-3.0-EYFP	38	-9.44776	1.02926
GtCCR4-3.0-EYFP	39	-9.43284	1.02674
GtCCR4-3.0-EYFP	40	-9.41791	1.01317
GtCCR4-3.0-EYFP	41	-9.40299	1.0047
GtCCR4-3.0-EYFP	42	-9.38806	0.999599
GtCCR4-3.0-EYFP	43	-9.37313	0.993759
GtCCR4-3.0-EYFP	44	-9.35821	0.985742
GtCCR4-3.0-EYFP	45	-9.34328	0.984769
GtCCR4-3.0-EYFP	46	-9.32836	0.974519
GtCCR4-3.0-EYFP	47	-9.31343	0.970797
GtCCR4-3.0-EYFP	48	-9.29851	0.966388
GtCCR4-3.0-EYFP	49	-9.28358	0.967648
GtCCR4-3.0-EYFP	50	-9.26866	0.970912
GtCCR4-3.0-EYFP	51	-9.25373	0.974977
GtCCR4-3.0-EYFP	52	-9.23881	0.978814
GtCCR4-3.0-EYFP	53	-9.22388	0.99038
GtCCR4-3.0-EYFP	54	-9.20896	1.01271
GtCCR4-3.0-EYFP	55	-9.19403	1.02909
GtCCR4-3.0-EYFP	56	-9.1791	1.03224
GtCCR4-3.0-EYFP	57	-9.16418	1.03436
GtCCR4-3.0-EYFP	58	-9.14925	1.02783
GtCCR4-3.0-EYFP	59	-9.13433	1.01827
GtCCR4-3.0-EYFP	60	-9.1194	1.01099
GtCCR4-3.0-EYFP	61	-9.10448	1.00292
GtCCR4-3.0-EYFP	62	-9.08955	1
GtCCR4-3.0-EYFP	63	-9.07463	0.99456
GtCCR4-3.0-EYFP	64	-9.0597	0.992556
GtCCR4-3.0-EYFP	65	-9.04478	0.981619
GtCCR4-3.0-EYFP	66	-9.02985	0.980245
GtCCR4-3.0-EYFP	67	-9.01493	0.968335
GtCCR4-3.0-EYFP	68	-9	0.969537
GtCCR4-3.0-EYFP	69	-8.98507	0.970568
GtCCR4-3.0-EYFP	70	-8.97015	0.965758
GtCCR4-3.0-EYFP	71	-8.95522	0.972973
GtCCR4-3.0-EYFP	72	-8.9403	0.980932
GtCCR4-3.0-EYFP	73	-8.92537	1.00475
GtCCR4-3.0-EYFP	74	-8.91045	1.02084
GtCCR4-3.0-EYFP	75	-8.89552	1.02731
GtCCR4-3.0-EYFP	76	-8.8806	1.03172
GtCCR4-3.0-EYFP	77	-8.86567	1.02611
GtCCR4-3.0-EYFP	78	-8.85075	1.01947
GtCCR4-3.0-EYFP	79	-8.83582	1.01804
GtCCR4-3.0-EYFP	80	-8.8209	1.00533
GtCCR4-3.0-EYFP	81	-8.80597	0.996851
GtCCR4-3.0-EYFP	82	-8.79104	0.993071
GtCCR4-3.0-EYFP	83	-8.77612	0.987288
GtCCR4-3.0-EYFP	84	-8.76119	0.980474
GtCCR4-3.0-EYFP	85	-8.74627	0.977382
GtCCR4-3.0-EYFP	86	-8.73134	0.970912
GtCCR4-3.0-EYFP	87	-8.71642	0.969766
GtCCR4-3.0-EYFP	88	-8.70149	0.969595
GtCCR4-3.0-EYFP	89	-8.68657	0.96822
GtCCR4-3.0-EYFP	90	-8.67164	0.970683
GtCCR4-3.0-EYFP	91	-8.65672	0.977955
GtCCR4-3.0-EYFP	92	-8.64179	0.997824
GtCCR4-3.0-EYFP	93	-8.62687	1.02033
GtCCR4-3.0-EYFP	94	-8.61194	1.02726
GtCCR4-3.0-EYFP	95	-8.59701	1.03138
GtCCR4-3.0-EYFP	96	-8.58209	1.02834
GtCCR4-3.0-EYFP	97	-8.56716	1.02474
GtCCR4-3.0-EYFP	98	-8.55224	1.01735
GtCCR4-3.0-EYFP	99	-8.53731	1.0079
GtCCR4-3.0-EYFP	100	-8.52239	1.00624
GtCCR4-3.0-EYFP	101	-8.50746	1.00137
GtCCR4-3.0-EYFP	102	-8.49254	0.989808
GtCCR4-3.0-EYFP	103	-8.47761	0.981963
GtCCR4-3.0-EYFP	104	-8.46269	0.97303
GtCCR4-3.0-EYFP	105	-8.44776	0.969709
GtCCR4-3.0-EYFP	106	-8.43284	0.966102
GtCCR4-3.0-EYFP	107	-8.41791	0.966388
GtCCR4-3.0-EYFP	108	-8.40299	0.964956
GtCCR4-3.0-EYFP	109	-8.38806	0.96404
GtCCR4-3.0-EYFP	110	-8.37313	0.968564
GtCCR4-3.0-EYFP	111	-8.35821	0.991239
GtCCR4-3.0-EYFP	112	-8.34328	1.01077
GtCCR4-3.0-EYFP	113	-8.32836	1.0201
GtCCR4-3.0-EYFP	114	-8.31343	1.02983
GtCCR4-3.0-EYFP	115	-8.29851	1.03688
GtCCR4-3.0-EYFP	116	-8.28358	1.02462
GtCCR4-3.0-EYFP	117	-8.26866	1.02456
GtCCR4-3.0-EYFP	118	-8.25373	1.01598
GtCCR4-3.0-EYFP	119	-8.23881	1.00888
GtCCR4-3.0-EYFP	120	-8.22388	1.00166
GtCCR4-3.0-EYFP	121	-8.20896	0.993816
GtCCR4-3.0-EYFP	122	-8.19403	0.987689
GtCCR4-3.0-EYFP	123	-8.1791	0.976065
GtCCR4-3.0-EYFP	124	-8.16418	0.968507
GtCCR4-3.0-EYFP	125	-8.14925	0.965644
GtCCR4-3.0-EYFP	126	-8.13433	0.964556
GtCCR4-3.0-EYFP	127	-8.1194	0.965701
GtCCR4-3.0-EYFP	128	-8.10448	0.962609
GtCCR4-3.0-EYFP	129	-8.08955	0.96759
GtCCR4-3.0-EYFP	130	-8.07463	0.981734
GtCCR4-3.0-EYFP	131	-8.0597	0.992728
GtCCR4-3.0-EYFP	132	-8.04478	1.01695
GtCCR4-3.0-EYFP	133	-8.02985	1.02577
GtCCR4-3.0-EYFP	134	-8.01493	1.03184
GtCCR4-3.0-EYFP	135	-8	1.02726
GtCCR4-3.0-EYFP	136	-7.98507	1.01878
GtCCR4-3.0-EYFP	137	-7.97015	1.00618
GtCCR4-3.0-EYFP	138	-7.95522	1.00555
GtCCR4-3.0-EYFP	139	-7.9403	0.999828
GtCCR4-3.0-EYFP	140	-7.92537	0.996221
GtCCR4-3.0-EYFP	141	-7.91045	0.995705
GtCCR4-3.0-EYFP	142	-7.89552	0.987059
GtCCR4-3.0-EYFP	143	-7.8806	0.976409
GtCCR4-3.0-EYFP	144	-7.86567	0.969938
GtCCR4-3.0-EYFP	145	-7.85075	0.965186
GtCCR4-3.0-EYFP	146	-7.83582	0.967247
GtCCR4-3.0-EYFP	147	-7.8209	0.971312
GtCCR4-3.0-EYFP	148	-7.80597	0.970854
GtCCR4-3.0-EYFP	149	-7.79104	0.974404
GtCCR4-3.0-EYFP	150	-7.77612	0.987861
GtCCR4-3.0-EYFP	151	-7.76119	1.01151
GtCCR4-3.0-EYFP	152	-7.74627	1.02434
GtCCR4-3.0-EYFP	153	-7.73134	1.03241
GtCCR4-3.0-EYFP	154	-7.71642	1.0343
GtCCR4-3.0-EYFP	155	-7.70149	1.03098
GtCCR4-3.0-EYFP	156	-7.68657	1.0217
GtCCR4-3.0-EYFP	157	-7.67164	1.0146
GtCCR4-3.0-EYFP	158	-7.65672	1.00286
GtCCR4-3.0-EYFP	159	-7.64179	1.00011
GtCCR4-3.0-EYFP	160	-7.62687	0.999027
GtCCR4-3.0-EYFP	161	-7.61194	0.988834
GtCCR4-3.0-EYFP	162	-7.59701	0.98328
GtCCR4-3.0-EYFP	163	-7.58209	0.976638
GtCCR4-3.0-EYFP	164	-7.56716	0.970912
GtCCR4-3.0-EYFP	165	-7.55224	0.970282
GtCCR4-3.0-EYFP	166	-7.53731	0.96948
GtCCR4-3.0-EYFP	167	-7.52239	0.972458
GtCCR4-3.0-EYFP	168	-7.50746	0.976752
GtCCR4-3.0-EYFP	169	-7.49254	0.983566
GtCCR4-3.0-EYFP	170	-7.47761	0.993186
GtCCR4-3.0-EYFP	171	-7.46269	1.02038
GtCCR4-3.0-EYFP	172	-7.44776	1.026
GtCCR4-3.0-EYFP	173	-7.43284	1.02525
GtCCR4-3.0-EYFP	174	-7.41791	1.02754
GtCCR4-3.0-EYFP	175	-7.40299	1.02777
GtCCR4-3.0-EYFP	176	-7.38806	1.01014
GtCCR4-3.0-EYFP	177	-7.37313	1.00424
GtCCR4-3.0-EYFP	178	-7.35821	1.00624
GtCCR4-3.0-EYFP	179	-7.34328	1.00172
GtCCR4-3.0-EYFP	180	-7.32836	0.990896
GtCCR4-3.0-EYFP	181	-7.31343	0.986086
GtCCR4-3.0-EYFP	182	-7.29851	0.974118
GtCCR4-3.0-EYFP	183	-7.28358	0.972057
GtCCR4-3.0-EYFP	184	-7.26866	0.97137
GtCCR4-3.0-EYFP	185	-7.25373	0.967991
GtCCR4-3.0-EYFP	186	-7.23881	0.969938
GtCCR4-3.0-EYFP	187	-7.22388	0.968335
GtCCR4-3.0-EYFP	188	-7.20896	0.976008
GtCCR4-3.0-EYFP	189	-7.19403	0.991354
GtCCR4-3.0-EYFP	190	-7.1791	1.00555
GtCCR4-3.0-EYFP	191	-7.16418	1.02571
GtCCR4-3.0-EYFP	192	-7.14925	1.03018
GtCCR4-3.0-EYFP	193	-7.13433	1.03607
GtCCR4-3.0-EYFP	194	-7.1194	1.02978
GtCCR4-3.0-EYFP	195	-7.10448	1.02164
GtCCR4-3.0-EYFP	196	-7.08955	1.01666
GtCCR4-3.0-EYFP	197	-7.07463	1.00767
GtCCR4-3.0-EYFP	198	-7.0597	1.00298
GtCCR4-3.0-EYFP	199	-7.04478	0.995934
GtCCR4-3.0-EYFP	200	-7.02985	0.998626
GtCCR4-3.0-EYFP	201	-7.01493	0.985799
GtCCR4-3.0-EYFP	202	-7	0.979214
GtCCR4-3.0-EYFP	203	-6.98507	0.974691
GtCCR4-3.0-EYFP	204	-6.97015	0.974462
GtCCR4-3.0-EYFP	205	-6.95522	0.971312
GtCCR4-3.0-EYFP	206	-6.9403	0.978642
GtCCR4-3.0-EYFP	207	-6.92537	0.972114
GtCCR4-3.0-EYFP	208	-6.91045	0.981104
GtCCR4-3.0-EYFP	209	-6.89552	0.988777
GtCCR4-3.0-EYFP	210	-6.8806	1.02182
GtCCR4-3.0-EYFP	211	-6.86567	1.026
GtCCR4-3.0-EYFP	212	-6.85075	1.0276
GtCCR4-3.0-EYFP	213	-6.83582	1.02869
GtCCR4-3.0-EYFP	214	-6.8209	1.02497
GtCCR4-3.0-EYFP	215	-6.80597	1.01437
GtCCR4-3.0-EYFP	216	-6.79104	1.01437
GtCCR4-3.0-EYFP	217	-6.77612	1.0067
GtCCR4-3.0-EYFP	218	-6.76119	1.00372
GtCCR4-3.0-EYFP	219	-6.74627	0.994847
GtCCR4-3.0-EYFP	220	-6.73134	0.989521
GtCCR4-3.0-EYFP	221	-6.71642	0.975893
GtCCR4-3.0-EYFP	222	-6.70149	0.970854
GtCCR4-3.0-EYFP	223	-6.68657	0.975721
GtCCR4-3.0-EYFP	224	-6.67164	0.969709
GtCCR4-3.0-EYFP	225	-6.65672	0.969022
GtCCR4-3.0-EYFP	226	-6.64179	0.970282
GtCCR4-3.0-EYFP	227	-6.62687	0.975664
GtCCR4-3.0-EYFP	228	-6.61194	0.982994
GtCCR4-3.0-EYFP	229	-6.59701	1.0055
GtCCR4-3.0-EYFP	230	-6.58209	1.02256
GtCCR4-3.0-EYFP	231	-6.56716	1.03029
GtCCR4-3.0-EYFP	232	-6.55224	1.03338
GtCCR4-3.0-EYFP	233	-6.53731	1.03304
GtCCR4-3.0-EYFP	234	-6.52239	1.02399
GtCCR4-3.0-EYFP	235	-6.50746	1.01683
GtCCR4-3.0-EYFP	236	-6.49254	1.00813
GtCCR4-3.0-EYFP	237	-6.47761	1.00229
GtCCR4-3.0-EYFP	238	-6.46269	0.998053
GtCCR4-3.0-EYFP	239	-6.44776	0.990953
GtCCR4-3.0-EYFP	240	-6.43284	0.98454
GtCCR4-3.0-EYFP	241	-6.41791	0.975092
GtCCR4-3.0-EYFP	242	-6.40299	0.97366
GtCCR4-3.0-EYFP	243	-6.38806	0.970683
GtCCR4-3.0-EYFP	244	-6.37313	0.971942
GtCCR4-3.0-EYFP	245	-6.35821	0.967934
GtCCR4-3.0-EYFP	246	-6.34328	0.972286
GtCCR4-3.0-EYFP	247	-6.32836	0.988548
GtCCR4-3.0-EYFP	248	-6.31343	1.00784
GtCCR4-3.0-EYFP	249	-6.29851	1.02142
GtCCR4-3.0-EYFP	250	-6.28358	1.02743
GtCCR4-3.0-EYFP	251	-6.26866	1.03155
GtCCR4-3.0-EYFP	252	-6.25373	1.03058
GtCCR4-3.0-EYFP	253	-6.23881	1.02628
GtCCR4-3.0-EYFP	254	-6.22388	1.01517
GtCCR4-3.0-EYFP	255	-6.20896	1.01036
GtCCR4-3.0-EYFP	256	-6.19403	1.0059
GtCCR4-3.0-EYFP	257	-6.1791	1.00298
GtCCR4-3.0-EYFP	258	-6.16418	0.995877
GtCCR4-3.0-EYFP	259	-6.14925	0.984196
GtCCR4-3.0-EYFP	260	-6.13433	0.973946
GtCCR4-3.0-EYFP	261	-6.1194	0.971599
GtCCR4-3.0-EYFP	262	-6.10448	0.969251
GtCCR4-3.0-EYFP	263	-6.08955	0.971141
GtCCR4-3.0-EYFP	264	-6.07463	0.971942
GtCCR4-3.0-EYFP	265	-6.0597	0.977268
GtCCR4-3.0-EYFP	266	-6.04478	0.988777
GtCCR4-3.0-EYFP	267	-6.02985	0.997595
GtCCR4-3.0-EYFP	268	-6.01493	1.02205
GtCCR4-3.0-EYFP	269	-6	1.02966
GtCCR4-3.0-EYFP	270	-5.98507	1.0339
GtCCR4-3.0-EYFP	271	-5.97015	1.03567
GtCCR4-3.0-EYFP	272	-5.95522	1.03035
GtCCR4-3.0-EYFP	273	-5.9403	1.02107
GtCCR4-3.0-EYFP	274	-5.92537	1.01054
GtCCR4-3.0-EYFP	275	-5.91045	1.00819
GtCCR4-3.0-EYFP	276	-5.89552	1.00744
GtCCR4-3.0-EYFP	277	-5.8806	1.0004
GtCCR4-3.0-EYFP	278	-5.86567	0.989979
GtCCR4-3.0-EYFP	279	-5.85075	0.987059
GtCCR4-3.0-EYFP	280	-5.83582	0.978871
GtCCR4-3.0-EYFP	281	-5.8209	0.976409
GtCCR4-3.0-EYFP	282	-5.80597	0.97177
GtCCR4-3.0-EYFP	283	-5.79104	0.974462
GtCCR4-3.0-EYFP	284	-5.77612	0.976981
GtCCR4-3.0-EYFP	285	-5.76119	0.980302
GtCCR4-3.0-EYFP	286	-5.74627	0.994331
GtCCR4-3.0-EYFP	287	-5.73134	1.01082
GtCCR4-3.0-EYFP	288	-5.71642	1.03081
GtCCR4-3.0-EYFP	289	-5.70149	1.02903
GtCCR4-3.0-EYFP	290	-5.68657	1.03092
GtCCR4-3.0-EYFP	291	-5.67164	1.03058
GtCCR4-3.0-EYFP	292	-5.65672	1.01844
GtCCR4-3.0-EYFP	293	-5.64179	1.01099
GtCCR4-3.0-EYFP	294	-5.62687	1.00784
GtCCR4-3.0-EYFP	295	-5.61194	0.999427
GtCCR4-3.0-EYFP	296	-5.59701	0.998969
GtCCR4-3.0-EYFP	297	-5.58209	0.997595
GtCCR4-3.0-EYFP	298	-5.56716	0.981677
GtCCR4-3.0-EYFP	299	-5.55224	0.974347
GtCCR4-3.0-EYFP	300	-5.53731	0.972629
GtCCR4-3.0-EYFP	301	-5.52239	0.965586
GtCCR4-3.0-EYFP	302	-5.50746	0.967476
GtCCR4-3.0-EYFP	303	-5.49254	0.971942
GtCCR4-3.0-EYFP	304	-5.47761	0.975721
GtCCR4-3.0-EYFP	305	-5.46269	0.986086
GtCCR4-3.0-EYFP	306	-5.44776	1.00836
GtCCR4-3.0-EYFP	307	-5.43284	1.02233
GtCCR4-3.0-EYFP	308	-5.41791	1.03292
GtCCR4-3.0-EYFP	309	-5.40299	1.0367
GtCCR4-3.0-EYFP	310	-5.38806	1.03504
GtCCR4-3.0-EYFP	311	-5.37313	1.03023
GtCCR4-3.0-EYFP	312	-5.35821	1.01615
GtCCR4-3.0-EYFP	313	-5.34328	1.01838
GtCCR4-3.0-EYFP	314	-5.32836	1.00281
GtCCR4-3.0-EYFP	315	-5.31343	0.999198
GtCCR4-3.0-EYFP	316	-5.29851	0.99164
GtCCR4-3.0-EYFP	317	-5.28358	0.985799
GtCCR4-3.0-EYFP	318	-5.26866	0.978585
GtCCR4-3.0-EYFP	319	-5.25373	0.970797
GtCCR4-3.0-EYFP	320	-5.23881	0.965586
GtCCR4-3.0-EYFP	321	-5.22388	0.972057
GtCCR4-3.0-EYFP	322	-5.20896	0.975951
GtCCR4-3.0-EYFP	323	-5.19403	0.973775
GtCCR4-3.0-EYFP	324	-5.1791	0.980989
GtCCR4-3.0-EYFP	325	-5.16418	0.999885
GtCCR4-3.0-EYFP	326	-5.14925	1.0217
GtCCR4-3.0-EYFP	327	-5.13433	1.03596
GtCCR4-3.0-EYFP	328	-5.1194	1.03934
GtCCR4-3.0-EYFP	329	-5.10448	1.03355
GtCCR4-3.0-EYFP	330	-5.08955	1.0272
GtCCR4-3.0-EYFP	331	-5.07463	1.02313
GtCCR4-3.0-EYFP	332	-5.0597	1.01386
GtCCR4-3.0-EYFP	333	-5.04478	1.0063
GtCCR4-3.0-EYFP	334	-5.02985	1.00166
GtCCR4-3.0-EYFP	335	-5.01493	0.995247
GtCCR4-3.0-EYFP	336	-5	0.988548
GtCCR4-3.0-EYFP	337	-4.98507	0.978585
GtCCR4-3.0-EYFP	338	-4.97015	0.974691
GtCCR4-3.0-EYFP	339	-4.95522	0.975779
GtCCR4-3.0-EYFP	340	-4.9403	0.977325
GtCCR4-3.0-EYFP	341	-4.92537	0.969251
GtCCR4-3.0-EYFP	342	-4.91045	0.97366
GtCCR4-3.0-EYFP	343	-4.89552	0.979043
GtCCR4-3.0-EYFP	344	-4.8806	0.989979
GtCCR4-3.0-EYFP	345	-4.86567	1.01615
GtCCR4-3.0-EYFP	346	-4.85075	1.02857
GtCCR4-3.0-EYFP	347	-4.83582	1.03418
GtCCR4-3.0-EYFP	348	-4.8209	1.0331
GtCCR4-3.0-EYFP	349	-4.80597	1.03384
GtCCR4-3.0-EYFP	350	-4.79104	1.0256
GtCCR4-3.0-EYFP	351	-4.77612	1.0126
GtCCR4-3.0-EYFP	352	-4.76119	1.0083
GtCCR4-3.0-EYFP	353	-4.74627	1.00137
GtCCR4-3.0-EYFP	354	-4.73134	0.99582
GtCCR4-3.0-EYFP	355	-4.71642	0.98872
GtCCR4-3.0-EYFP	356	-4.70149	0.976695
GtCCR4-3.0-EYFP	357	-4.68657	0.971942
GtCCR4-3.0-EYFP	358	-4.67164	0.970224
GtCCR4-3.0-EYFP	359	-4.65672	0.971255
GtCCR4-3.0-EYFP	360	-4.64179	0.968049
GtCCR4-3.0-EYFP	361	-4.62687	0.967361
GtCCR4-3.0-EYFP	362	-4.61194	0.976924
GtCCR4-3.0-EYFP	363	-4.59701	0.990323
GtCCR4-3.0-EYFP	364	-4.58209	1.01443
GtCCR4-3.0-EYFP	365	-4.56716	1.02714
GtCCR4-3.0-EYFP	366	-4.55224	1.03384
GtCCR4-3.0-EYFP	367	-4.53731	1.03648
GtCCR4-3.0-EYFP	368	-4.52239	1.03315
GtCCR4-3.0-EYFP	369	-4.50746	1.02737
GtCCR4-3.0-EYFP	370	-4.49254	1.02044
GtCCR4-3.0-EYFP	371	-4.47761	1.0126
GtCCR4-3.0-EYFP	372	-4.46269	1.00407
GtCCR4-3.0-EYFP	373	-4.44776	0.995763
GtCCR4-3.0-EYFP	374	-4.43284	0.991984
GtCCR4-3.0-EYFP	375	-4.41791	0.983337
GtCCR4-3.0-EYFP	376	-4.40299	0.974175
GtCCR4-3.0-EYFP	377	-4.38806	0.967705
GtCCR4-3.0-EYFP	378	-4.37313	0.968163
GtCCR4-3.0-EYFP	379	-4.35821	0.969366
GtCCR4-3.0-EYFP	380	-4.34328	0.970854
GtCCR4-3.0-EYFP	381	-4.32836	0.974576
GtCCR4-3.0-EYFP	382	-4.31343	0.986086
GtCCR4-3.0-EYFP	383	-4.29851	1.00596
GtCCR4-3.0-EYFP	384	-4.28358	1.02474
GtCCR4-3.0-EYFP	385	-4.26866	1.03155
GtCCR4-3.0-EYFP	386	-4.25373	1.03476
GtCCR4-3.0-EYFP	387	-4.23881	1.03951
GtCCR4-3.0-EYFP	388	-4.22388	1.028
GtCCR4-3.0-EYFP	389	-4.20896	1.02605
GtCCR4-3.0-EYFP	390	-4.19403	1.01374
GtCCR4-3.0-EYFP	391	-4.1791	1.00515
GtCCR4-3.0-EYFP	392	-4.16418	1.00298
GtCCR4-3.0-EYFP	393	-4.14925	0.99708
GtCCR4-3.0-EYFP	394	-4.13433	0.985742
GtCCR4-3.0-EYFP	395	-4.1194	0.978871
GtCCR4-3.0-EYFP	396	-4.10448	0.974977
GtCCR4-3.0-EYFP	397	-4.08955	0.973946
GtCCR4-3.0-EYFP	398	-4.07463	0.97366
GtCCR4-3.0-EYFP	399	-4.0597	0.97137
GtCCR4-3.0-EYFP	400	-4.04478	0.970454
GtCCR4-3.0-EYFP	401	-4.02985	0.974175
GtCCR4-3.0-EYFP	402	-4.01493	0.987803
GtCCR4-3.0-EYFP	403	-4	1.00338
GtCCR4-3.0-EYFP	404	-3.98507	1.02508
GtCCR4-3.0-EYFP	405	-3.97015	1.028
GtCCR4-3.0-EYFP	406	-3.95522	1.03258
GtCCR4-3.0-EYFP	407	-3.9403	1.03207
GtCCR4-3.0-EYFP	408	-3.92537	1.026
GtCCR4-3.0-EYFP	409	-3.91045	1.01609
GtCCR4-3.0-EYFP	410	-3.89552	1.01002
GtCCR4-3.0-EYFP	411	-3.8806	1.00475
GtCCR4-3.0-EYFP	412	-3.86567	0.997423
GtCCR4-3.0-EYFP	413	-3.85075	0.999141
GtCCR4-3.0-EYFP	414	-3.83582	0.98872
GtCCR4-3.0-EYFP	415	-3.8209	0.97973
GtCCR4-3.0-EYFP	416	-3.80597	0.975034
GtCCR4-3.0-EYFP	417	-3.79104	0.975092
GtCCR4-3.0-EYFP	418	-3.77612	0.979615
GtCCR4-3.0-EYFP	419	-3.76119	0.981276
GtCCR4-3.0-EYFP	420	-3.74627	0.979844
GtCCR4-3.0-EYFP	421	-3.73134	0.97973
GtCCR4-3.0-EYFP	422	-3.71642	0.993988
GtCCR4-3.0-EYFP	423	-3.70149	1.01552
GtCCR4-3.0-EYFP	424	-3.68657	1.02537
GtCCR4-3.0-EYFP	425	-3.67164	1.03481
GtCCR4-3.0-EYFP	426	-3.65672	1.04632
GtCCR4-3.0-EYFP	427	-3.64179	1.0402
GtCCR4-3.0-EYFP	428	-3.62687	1.02537
GtCCR4-3.0-EYFP	429	-3.61194	1.01598
GtCCR4-3.0-EYFP	430	-3.59701	1.01077
GtCCR4-3.0-EYFP	431	-3.58209	1.00137
GtCCR4-3.0-EYFP	432	-3.56716	0.999885
GtCCR4-3.0-EYFP	433	-3.55224	0.99456
GtCCR4-3.0-EYFP	434	-3.53731	0.982936
GtCCR4-3.0-EYFP	435	-3.52239	0.981104
GtCCR4-3.0-EYFP	436	-3.50746	0.978298
GtCCR4-3.0-EYFP	437	-3.49254	0.977439
GtCCR4-3.0-EYFP	438	-3.47761	0.97784
GtCCR4-3.0-EYFP	439	-3.46269	0.976008
GtCCR4-3.0-EYFP	440	-3.44776	0.978527
GtCCR4-3.0-EYFP	441	-3.43284	0.986658
GtCCR4-3.0-EYFP	442	-3.41791	1.00464
GtCCR4-3.0-EYFP	443	-3.40299	1.02617
GtCCR4-3.0-EYFP	444	-3.38806	1.03138
GtCCR4-3.0-EYFP	445	-3.37313	1.03436
GtCCR4-3.0-EYFP	446	-3.35821	1.02811
GtCCR4-3.0-EYFP	447	-3.34328	1.02262
GtCCR4-3.0-EYFP	448	-3.32836	1.02033
GtCCR4-3.0-EYFP	449	-3.31343	1.00658
GtCCR4-3.0-EYFP	450	-3.29851	1.00584
GtCCR4-3.0-EYFP	451	-3.28358	1.00716
GtCCR4-3.0-EYFP	452	-3.26866	0.99582
GtCCR4-3.0-EYFP	453	-3.25373	0.982478
GtCCR4-3.0-EYFP	454	-3.23881	0.977783
GtCCR4-3.0-EYFP	455	-3.22388	0.971083
GtCCR4-3.0-EYFP	456	-3.20896	0.972286
GtCCR4-3.0-EYFP	457	-3.19403	0.970396
GtCCR4-3.0-EYFP	458	-3.1791	0.968507
GtCCR4-3.0-EYFP	459	-3.16418	0.97137
GtCCR4-3.0-EYFP	460	-3.14925	0.98202
GtCCR4-3.0-EYFP	461	-3.13433	0.991182
GtCCR4-3.0-EYFP	462	-3.1194	1.01781
GtCCR4-3.0-EYFP	463	-3.10448	1.03436
GtCCR4-3.0-EYFP	464	-3.08955	1.03974
GtCCR4-3.0-EYFP	465	-3.07463	1.04627
GtCCR4-3.0-EYFP	466	-3.0597	1.03997
GtCCR4-3.0-EYFP	467	-3.04478	1.03338
GtCCR4-3.0-EYFP	468	-3.02985	1.02605
GtCCR4-3.0-EYFP	469	-3.01493	1.01369
GtCCR4-3.0-EYFP	470	-3	1.00464
GtCCR4-3.0-EYFP	471	-2.98507	0.998397
GtCCR4-3.0-EYFP	472	-2.97015	0.993816
GtCCR4-3.0-EYFP	473	-2.95522	0.982135
GtCCR4-3.0-EYFP	474	-2.9403	0.9791
GtCCR4-3.0-EYFP	475	-2.92537	0.972973
GtCCR4-3.0-EYFP	476	-2.91045	0.972801
GtCCR4-3.0-EYFP	477	-2.89552	0.974977
GtCCR4-3.0-EYFP	478	-2.8806	0.972171
GtCCR4-3.0-EYFP	479	-2.86567	0.969824
GtCCR4-3.0-EYFP	480	-2.85075	0.97847
GtCCR4-3.0-EYFP	481	-2.83582	0.9929
GtCCR4-3.0-EYFP	482	-2.8209	1.01357
GtCCR4-3.0-EYFP	483	-2.80597	1.02697
GtCCR4-3.0-EYFP	484	-2.79104	1.02668
GtCCR4-3.0-EYFP	485	-2.77612	1.03619
GtCCR4-3.0-EYFP	486	-2.76119	1.026
GtCCR4-3.0-EYFP	487	-2.74627	1.01804
GtCCR4-3.0-EYFP	488	-2.73134	1.01735
GtCCR4-3.0-EYFP	489	-2.71642	1.00882
GtCCR4-3.0-EYFP	490	-2.70149	1.00521
GtCCR4-3.0-EYFP	491	-2.68657	0.995419
GtCCR4-3.0-EYFP	492	-2.67164	0.991354
GtCCR4-3.0-EYFP	493	-2.65672	0.978642
GtCCR4-3.0-EYFP	494	-2.64179	0.973832
GtCCR4-3.0-EYFP	495	-2.62687	0.972687
GtCCR4-3.0-EYFP	496	-2.61194	0.977325
GtCCR4-3.0-EYFP	497	-2.59701	0.974004
GtCCR4-3.0-EYFP	498	-2.58209	0.974061
GtCCR4-3.0-EYFP	499	-2.56716	0.976122
GtCCR4-3.0-EYFP	500	-2.55224	0.987975
GtCCR4-3.0-EYFP	501	-2.53731	1.00498
GtCCR4-3.0-EYFP	502	-2.52239	1.02382
GtCCR4-3.0-EYFP	503	-2.50746	1.03104
GtCCR4-3.0-EYFP	504	-2.49254	1.03573
GtCCR4-3.0-EYFP	505	-2.47761	1.0351
GtCCR4-3.0-EYFP	506	-2.46269	1.03607
GtCCR4-3.0-EYFP	507	-2.44776	1.02399
GtCCR4-3.0-EYFP	508	-2.43284	1.01403
GtCCR4-3.0-EYFP	509	-2.41791	1.00676
GtCCR4-3.0-EYFP	510	-2.40299	1.00017
GtCCR4-3.0-EYFP	511	-2.38806	0.99519
GtCCR4-3.0-EYFP	512	-2.37313	0.989178
GtCCR4-3.0-EYFP	513	-2.35821	0.979558
GtCCR4-3.0-EYFP	514	-2.34328	0.974805
GtCCR4-3.0-EYFP	515	-2.32836	0.970797
GtCCR4-3.0-EYFP	516	-2.31343	0.972973
GtCCR4-3.0-EYFP	517	-2.29851	0.974004
GtCCR4-3.0-EYFP	518	-2.28358	0.969194
GtCCR4-3.0-EYFP	519	-2.26866	0.982421
GtCCR4-3.0-EYFP	520	-2.25373	0.993759
GtCCR4-3.0-EYFP	521	-2.23881	1.01512
GtCCR4-3.0-EYFP	522	-2.22388	1.02932
GtCCR4-3.0-EYFP	523	-2.20896	1.03854
GtCCR4-3.0-EYFP	524	-2.19403	1.04008
GtCCR4-3.0-EYFP	525	-2.1791	1.03516
GtCCR4-3.0-EYFP	526	-2.16418	1.03029
GtCCR4-3.0-EYFP	527	-2.14925	1.0213
GtCCR4-3.0-EYFP	528	-2.13433	1.01277
GtCCR4-3.0-EYFP	529	-2.1194	1.00258
GtCCR4-3.0-EYFP	530	-2.10448	0.998168
GtCCR4-3.0-EYFP	531	-2.08955	0.994847
GtCCR4-3.0-EYFP	532	-2.07463	0.98391
GtCCR4-3.0-EYFP	533	-2.0597	0.982364
GtCCR4-3.0-EYFP	534	-2.04478	0.979844
GtCCR4-3.0-EYFP	535	-2.02985	0.976409
GtCCR4-3.0-EYFP	536	-2.01493	0.977268
GtCCR4-3.0-EYFP	537	-2	0.979157
GtCCR4-3.0-EYFP	538	-1.98507	0.978241
GtCCR4-3.0-EYFP	539	-1.97015	0.98809
GtCCR4-3.0-EYFP	540	-1.95522	1.00195
GtCCR4-3.0-EYFP	541	-1.9403	1.02439
GtCCR4-3.0-EYFP	542	-1.92537	1.03241
GtCCR4-3.0-EYFP	543	-1.91045	1.04214
GtCCR4-3.0-EYFP	544	-1.89552	1.03625
GtCCR4-3.0-EYFP	545	-1.8806	1.0331
GtCCR4-3.0-EYFP	546	-1.86567	1.02474
GtCCR4-3.0-EYFP	547	-1.85075	1.01306
GtCCR4-3.0-EYFP	548	-1.83582	1.00876
GtCCR4-3.0-EYFP	549	-1.8209	1.00401
GtCCR4-3.0-EYFP	550	-1.80597	0.994847
GtCCR4-3.0-EYFP	551	-1.79104	0.985857
GtCCR4-3.0-EYFP	552	-1.77612	0.976924
GtCCR4-3.0-EYFP	553	-1.76119	0.972458
GtCCR4-3.0-EYFP	554	-1.74627	0.972343
GtCCR4-3.0-EYFP	555	-1.73134	0.971255
GtCCR4-3.0-EYFP	556	-1.71642	0.967018
GtCCR4-3.0-EYFP	557	-1.70149	0.968392
GtCCR4-3.0-EYFP	558	-1.68657	0.974691
GtCCR4-3.0-EYFP	559	-1.67164	0.988605
GtCCR4-3.0-EYFP	560	-1.65672	1.00693
GtCCR4-3.0-EYFP	561	-1.64179	1.02479
GtCCR4-3.0-EYFP	562	-1.62687	1.03063
GtCCR4-3.0-EYFP	563	-1.61194	1.03779
GtCCR4-3.0-EYFP	564	-1.59701	1.03567
GtCCR4-3.0-EYFP	565	-1.58209	1.02749
GtCCR4-3.0-EYFP	566	-1.56716	1.01964
GtCCR4-3.0-EYFP	567	-1.55224	1.01311
GtCCR4-3.0-EYFP	568	-1.53731	1.00092
GtCCR4-3.0-EYFP	569	-1.52239	1.00561
GtCCR4-3.0-EYFP	570	-1.50746	1.00006
GtCCR4-3.0-EYFP	571	-1.49254	0.989808
GtCCR4-3.0-EYFP	572	-1.47761	0.984883
GtCCR4-3.0-EYFP	573	-1.46269	0.974863
GtCCR4-3.0-EYFP	574	-1.44776	0.979443
GtCCR4-3.0-EYFP	575	-1.43284	0.974233
GtCCR4-3.0-EYFP	576	-1.41791	0.98139
GtCCR4-3.0-EYFP	577	-1.40299	0.972744
GtCCR4-3.0-EYFP	578	-1.38806	0.97973
GtCCR4-3.0-EYFP	579	-1.37313	0.991354
GtCCR4-3.0-EYFP	580	-1.35821	1.026
GtCCR4-3.0-EYFP	581	-1.34328	1.0359
GtCCR4-3.0-EYFP	582	-1.32836	1.03796
GtCCR4-3.0-EYFP	583	-1.31343	1.04043
GtCCR4-3.0-EYFP	584	-1.29851	1.03613
GtCCR4-3.0-EYFP	585	-1.28358	1.03098
GtCCR4-3.0-EYFP	586	-1.26866	1.01975
GtCCR4-3.0-EYFP	587	-1.25373	1.00573
GtCCR4-3.0-EYFP	588	-1.23881	1.00235
GtCCR4-3.0-EYFP	589	-1.22388	0.99811
GtCCR4-3.0-EYFP	590	-1.20896	0.98912
GtCCR4-3.0-EYFP	591	-1.19403	0.979615
GtCCR4-3.0-EYFP	592	-1.1791	0.97492
GtCCR4-3.0-EYFP	593	-1.16418	0.970854
GtCCR4-3.0-EYFP	594	-1.14925	0.970969
GtCCR4-3.0-EYFP	595	-1.13433	0.972171
GtCCR4-3.0-EYFP	596	-1.1194	0.976294
GtCCR4-3.0-EYFP	597	-1.10448	0.974748
GtCCR4-3.0-EYFP	598	-1.08955	0.987231
GtCCR4-3.0-EYFP	599	-1.07463	1.00034
GtCCR4-3.0-EYFP	600	-1.0597	1.01735
GtCCR4-3.0-EYFP	601	-1.04478	1.02863
GtCCR4-3.0-EYFP	602	-1.02985	1.03441
GtCCR4-3.0-EYFP	603	-1.01493	1.03642
GtCCR4-3.0-EYFP	604	-1	1.02594
GtCCR4-3.0-EYFP	605	-0.985075	1.01695
GtCCR4-3.0-EYFP	606	-0.970149	1.01059
GtCCR4-3.0-EYFP	607	-0.955224	1.00303
GtCCR4-3.0-EYFP	608	-0.940299	1.0004
GtCCR4-3.0-EYFP	609	-0.925373	0.998969
GtCCR4-3.0-EYFP	610	-0.910448	0.986486
GtCCR4-3.0-EYFP	611	-0.895522	0.977497
GtCCR4-3.0-EYFP	612	-0.880597	0.970339
GtCCR4-3.0-EYFP	613	-0.865672	0.969881
GtCCR4-3.0-EYFP	614	-0.850746	0.968793
GtCCR4-3.0-EYFP	615	-0.835821	0.967018
GtCCR4-3.0-EYFP	616	-0.820896	0.969137
GtCCR4-3.0-EYFP	617	-0.80597	0.982994
GtCCR4-3.0-EYFP	618	-0.791045	0.99582
GtCCR4-3.0-EYFP	619	-0.776119	1.01821
GtCCR4-3.0-EYFP	620	-0.761194	1.03258
GtCCR4-3.0-EYFP	621	-0.746269	1.04031
GtCCR4-3.0-EYFP	622	-0.731343	1.04312
GtCCR4-3.0-EYFP	623	-0.716418	1.03338
GtCCR4-3.0-EYFP	624	-0.701493	1.02594
GtCCR4-3.0-EYFP	625	-0.686567	1.01746
GtCCR4-3.0-EYFP	626	-0.671642	1.00899
GtCCR4-3.0-EYFP	627	-0.656716	1.0051
GtCCR4-3.0-EYFP	628	-0.641791	0.999198
GtCCR4-3.0-EYFP	629	-0.626866	0.994217
GtCCR4-3.0-EYFP	630	-0.61194	0.981848
GtCCR4-3.0-EYFP	631	-0.597015	0.979902
GtCCR4-3.0-EYFP	632	-0.58209	0.975721
GtCCR4-3.0-EYFP	633	-0.567164	0.981104
GtCCR4-3.0-EYFP	634	-0.552239	0.977668
GtCCR4-3.0-EYFP	635	-0.537313	0.975435
GtCCR4-3.0-EYFP	636	-0.522388	0.981791
GtCCR4-3.0-EYFP	637	-0.507463	0.998053
GtCCR4-3.0-EYFP	638	-0.492537	1.01867
GtCCR4-3.0-EYFP	639	-0.477612	1.02623
GtCCR4-3.0-EYFP	640	-0.462687	1.03149
GtCCR4-3.0-EYFP	641	-0.447761	1.03069
GtCCR4-3.0-EYFP	642	-0.432836	1.03258
GtCCR4-3.0-EYFP	643	-0.41791	1.02376
GtCCR4-3.0-EYFP	644	-0.402985	1.01489
GtCCR4-3.0-EYFP	645	-0.38806	1.00825
GtCCR4-3.0-EYFP	646	-0.373134	1.00521
GtCCR4-3.0-EYFP	647	-0.358209	1.00206
GtCCR4-3.0-EYFP	648	-0.343284	0.992327
GtCCR4-3.0-EYFP	649	-0.328358	0.981448
GtCCR4-3.0-EYFP	650	-0.313433	0.97847
GtCCR4-3.0-EYFP	651	-0.298507	0.972973
GtCCR4-3.0-EYFP	652	-0.283582	0.97366
GtCCR4-3.0-EYFP	653	-0.268657	0.969194
GtCCR4-3.0-EYFP	654	-0.253731	0.969766
GtCCR4-3.0-EYFP	655	-0.238806	0.976351
GtCCR4-3.0-EYFP	656	-0.223881	0.988662
GtCCR4-3.0-EYFP	657	-0.208955	1.00057
GtCCR4-3.0-EYFP	658	-0.19403	1.02605
GtCCR4-3.0-EYFP	659	-0.179104	1.02926
GtCCR4-3.0-EYFP	660	-0.164179	1.03607
GtCCR4-3.0-EYFP	661	-0.149254	1.03436
GtCCR4-3.0-EYFP	662	-0.134328	1.02548
GtCCR4-3.0-EYFP	663	-0.119403	1.01746
GtCCR4-3.0-EYFP	664	-0.104478	1.01386
GtCCR4-3.0-EYFP	665	-0.0895522	1.00074
GtCCR4-3.0-EYFP	666	-0.0746269	0.997538
GtCCR4-3.0-EYFP	667	-0.0597015	0.995934
GtCCR4-3.0-EYFP	668	-0.0447761	0.985284
GtCCR4-3.0-EYFP	669	-0.0298507	0.986486
GtCCR4-3.0-EYFP	670	-0.0149254	0.981448
GtCCR4-3.0-EYFP	671	0	0.982936
GtCCR4-3.0-EYFP	672	0.0149254	0.989006
GtCCR4-3.0-EYFP	673	0.0298507	0.986601
GtCCR4-3.0-EYFP	674	0.0447761	0.979443
GtCCR4-3.0-EYFP	675	0.0597015	0.972629
GtCCR4-3.0-EYFP	676	0.0746269	0.973259
GtCCR4-3.0-EYFP	677	0.0895522	0.979043
GtCCR4-3.0-EYFP	678	0.104478	0.980016
GtCCR4-3.0-EYFP	679	0.119403	0.983623
GtCCR4-3.0-EYFP	680	0.134328	0.987746
GtCCR4-3.0-EYFP	681	0.149254	0.99101
GtCCR4-3.0-EYFP	682	0.164179	0.991239
GtCCR4-3.0-EYFP	683	0.179104	0.99101
GtCCR4-3.0-EYFP	684	0.19403	0.990208
GtCCR4-3.0-EYFP	685	0.208955	0.990838
GtCCR4-3.0-EYFP	686	0.223881	0.993129
GtCCR4-3.0-EYFP	687	0.238806	0.995705
GtCCR4-3.0-EYFP	688	0.253731	0.990609
GtCCR4-3.0-EYFP	689	0.268657	0.986143
GtCCR4-3.0-EYFP	690	0.283582	0.985857
GtCCR4-3.0-EYFP	691	0.298507	0.991869
GtCCR4-3.0-EYFP	692	0.313433	0.988262
GtCCR4-3.0-EYFP	693	0.328358	0.987174
GtCCR4-3.0-EYFP	694	0.343284	0.986544
GtCCR4-3.0-EYFP	695	0.358209	0.989292
GtCCR4-3.0-EYFP	696	0.373134	0.991812
GtCCR4-3.0-EYFP	697	0.38806	0.995133
GtCCR4-3.0-EYFP	698	0.402985	1.0051
GtCCR4-3.0-EYFP	699	0.41791	1.01243
GtCCR4-3.0-EYFP	700	0.432836	1.02674
GtCCR4-3.0-EYFP	701	0.447761	1.03464
GtCCR4-3.0-EYFP	702	0.462687	1.04272
GtCCR4-3.0-EYFP	703	0.477612	1.03579
GtCCR4-3.0-EYFP	704	0.492537	1.02319
GtCCR4-3.0-EYFP	705	0.507463	1.00882
GtCCR4-3.0-EYFP	706	0.522388	1.0012
GtCCR4-3.0-EYFP	707	0.537313	0.997251
GtCCR4-3.0-EYFP	708	0.552239	0.99038
GtCCR4-3.0-EYFP	709	0.567164	0.983165
GtCCR4-3.0-EYFP	710	0.58209	0.975779
GtCCR4-3.0-EYFP	711	0.597015	0.975893
GtCCR4-3.0-EYFP	712	0.61194	0.97429
GtCCR4-3.0-EYFP	713	0.626866	0.972801
GtCCR4-3.0-EYFP	714	0.641791	0.971828
GtCCR4-3.0-EYFP	715	0.656716	0.971255
GtCCR4-3.0-EYFP	716	0.671642	0.975779
GtCCR4-3.0-EYFP	717	0.686567	0.986315
GtCCR4-3.0-EYFP	718	0.701493	0.995419
GtCCR4-3.0-EYFP	719	0.716418	1.01689
GtCCR4-3.0-EYFP	720	0.731343	1.03585
GtCCR4-3.0-EYFP	721	0.746269	1.03275
GtCCR4-3.0-EYFP	722	0.761194	1.03527
GtCCR4-3.0-EYFP	723	0.776119	1.02554
GtCCR4-3.0-EYFP	724	0.791045	1.01643
GtCCR4-3.0-EYFP	725	0.80597	1.00979
GtCCR4-3.0-EYFP	726	0.820896	1.00372
GtCCR4-3.0-EYFP	727	0.835821	0.999943
GtCCR4-3.0-EYFP	728	0.850746	0.997251
GtCCR4-3.0-EYFP	729	0.865672	0.987116
GtCCR4-3.0-EYFP	730	0.880597	0.977611
GtCCR4-3.0-EYFP	731	0.895522	0.97618
GtCCR4-3.0-EYFP	732	0.910448	0.973317
GtCCR4-3.0-EYFP	733	0.925373	0.969251
GtCCR4-3.0-EYFP	734	0.940299	0.967419
GtCCR4-3.0-EYFP	735	0.955224	0.967533
GtCCR4-3.0-EYFP	736	0.970149	0.972916
GtCCR4-3.0-EYFP	737	0.985075	0.98391
GtCCR4-3.0-EYFP	738	1	0.997767
GtCCR4-3.0-EYFP	739	1.01493	1.0197
GtCCR4-3.0-EYFP	740	1.02985	1.03373
GtCCR4-3.0-EYFP	741	1.04478	1.04386
GtCCR4-3.0-EYFP	742	1.0597	1.04014
GtCCR4-3.0-EYFP	743	1.07463	1.02737
GtCCR4-3.0-EYFP	744	1.08955	1.01844
GtCCR4-3.0-EYFP	745	1.10448	1.0146
GtCCR4-3.0-EYFP	746	1.1194	1.00407
GtCCR4-3.0-EYFP	747	1.13433	0.999599
GtCCR4-3.0-EYFP	748	1.14925	0.994159
GtCCR4-3.0-EYFP	749	1.16418	0.981505
GtCCR4-3.0-EYFP	750	1.1791	0.972973
GtCCR4-3.0-EYFP	751	1.19403	0.973431
GtCCR4-3.0-EYFP	752	1.20896	0.969595
GtCCR4-3.0-EYFP	753	1.22388	0.970454
GtCCR4-3.0-EYFP	754	1.23881	0.967018
GtCCR4-3.0-EYFP	755	1.25373	0.974061
GtCCR4-3.0-EYFP	756	1.26866	0.972
GtCCR4-3.0-EYFP	757	1.28358	0.979787
GtCCR4-3.0-EYFP	758	1.29851	0.986945
GtCCR4-3.0-EYFP	759	1.31343	1.01271
GtCCR4-3.0-EYFP	760	1.32836	1.02611
GtCCR4-3.0-EYFP	761	1.34328	1.03264
GtCCR4-3.0-EYFP	762	1.35821	1.03407
GtCCR4-3.0-EYFP	763	1.37313	1.02325
GtCCR4-3.0-EYFP	764	1.38806	1.01712
GtCCR4-3.0-EYFP	765	1.40299	1.00939
GtCCR4-3.0-EYFP	766	1.41791	1.00361
GtCCR4-3.0-EYFP	767	1.43284	0.994503
GtCCR4-3.0-EYFP	768	1.44776	0.991984
GtCCR4-3.0-EYFP	769	1.46269	0.983623
GtCCR4-3.0-EYFP	770	1.47761	0.972744
GtCCR4-3.0-EYFP	771	1.49254	0.969995
GtCCR4-3.0-EYFP	772	1.50746	0.97492
GtCCR4-3.0-EYFP	773	1.52239	0.96656
GtCCR4-3.0-EYFP	774	1.53731	0.967648
GtCCR4-3.0-EYFP	775	1.55224	0.969022
GtCCR4-3.0-EYFP	776	1.56716	0.9724
GtCCR4-3.0-EYFP	777	1.58209	0.980589
GtCCR4-3.0-EYFP	778	1.59701	0.999427
GtCCR4-3.0-EYFP	779	1.61194	1.02016
GtCCR4-3.0-EYFP	780	1.62687	1.02422
GtCCR4-3.0-EYFP	781	1.64179	1.02989
GtCCR4-3.0-EYFP	782	1.65672	1.02708
GtCCR4-3.0-EYFP	783	1.67164	1.02405
GtCCR4-3.0-EYFP	784	1.68657	1.01489
GtCCR4-3.0-EYFP	785	1.70149	1.00384
GtCCR4-3.0-EYFP	786	1.71642	0.998168
GtCCR4-3.0-EYFP	787	1.73134	0.996393
GtCCR4-3.0-EYFP	788	1.74627	0.995763
GtCCR4-3.0-EYFP	789	1.76119	0.982822
GtCCR4-3.0-EYFP	790	1.77612	0.972572
GtCCR4-3.0-EYFP	791	1.79104	0.972171
GtCCR4-3.0-EYFP	792	1.80597	0.971828
GtCCR4-3.0-EYFP	793	1.8209	0.971828
GtCCR4-3.0-EYFP	794	1.83582	0.971427
GtCCR4-3.0-EYFP	795	1.85075	0.966903
GtCCR4-3.0-EYFP	796	1.86567	0.976294
GtCCR4-3.0-EYFP	797	1.8806	0.989979
GtCCR4-3.0-EYFP	798	1.89552	1.01174
GtCCR4-3.0-EYFP	799	1.91045	1.02605
GtCCR4-3.0-EYFP	800	1.92537	1.03035
GtCCR4-3.0-EYFP	801	1.9403	1.03619
GtCCR4-3.0-EYFP	802	1.95522	1.03104
GtCCR4-3.0-EYFP	803	1.97015	1.02502
GtCCR4-3.0-EYFP	804	1.98507	1.01998
GtCCR4-3.0-EYFP	805	2	1.01128
GtCCR4-3.0-EYFP	806	2.01493	1.00252
GtCCR4-3.0-EYFP	807	2.02985	0.990208
GtCCR4-3.0-EYFP	808	2.04478	0.982765
GtCCR4-3.0-EYFP	809	2.0597	0.971198
GtCCR4-3.0-EYFP	810	2.07463	0.965529
GtCCR4-3.0-EYFP	811	2.08955	0.966789
GtCCR4-3.0-EYFP	812	2.10448	0.96782
GtCCR4-3.0-EYFP	813	2.1194	0.964899
GtCCR4-3.0-EYFP	814	2.13433	0.969022
GtCCR4-3.0-EYFP	815	2.14925	0.970053
GtCCR4-3.0-EYFP	816	2.16418	0.975321
GtCCR4-3.0-EYFP	817	2.1791	0.985227
GtCCR4-3.0-EYFP	818	2.19403	1.0185
GtCCR4-3.0-EYFP	819	2.20896	1.02829
GtCCR4-3.0-EYFP	820	2.22388	1.03825
GtCCR4-3.0-EYFP	821	2.23881	1.04151
GtCCR4-3.0-EYFP	822	2.25373	1.0339
GtCCR4-3.0-EYFP	823	2.26866	1.02296
GtCCR4-3.0-EYFP	824	2.28358	1.01838
GtCCR4-3.0-EYFP	825	2.29851	1.00676
GtCCR4-3.0-EYFP	826	2.31343	0.999656
GtCCR4-3.0-EYFP	827	2.32836	0.993186
GtCCR4-3.0-EYFP	828	2.34328	0.989464
GtCCR4-3.0-EYFP	829	2.35821	0.977897
GtCCR4-3.0-EYFP	830	2.37313	0.975034
GtCCR4-3.0-EYFP	831	2.38806	0.969709
GtCCR4-3.0-EYFP	832	2.40299	0.968449
GtCCR4-3.0-EYFP	833	2.41791	0.967877
GtCCR4-3.0-EYFP	834	2.43284	0.968907
GtCCR4-3.0-EYFP	835	2.44776	0.970339
GtCCR4-3.0-EYFP	836	2.46269	0.979272
GtCCR4-3.0-EYFP	837	2.47761	0.98683
GtCCR4-3.0-EYFP	838	2.49254	1.01678
GtCCR4-3.0-EYFP	839	2.50746	1.02554
GtCCR4-3.0-EYFP	840	2.52239	1.02909
GtCCR4-3.0-EYFP	841	2.53731	1.02789
GtCCR4-3.0-EYFP	842	2.55224	1.02863
GtCCR4-3.0-EYFP	843	2.56716	1.01517
GtCCR4-3.0-EYFP	844	2.58209	1.00956
GtCCR4-3.0-EYFP	845	2.59701	0.999256
GtCCR4-3.0-EYFP	846	2.61194	0.998454
GtCCR4-3.0-EYFP	847	2.62687	0.987517
GtCCR4-3.0-EYFP	848	2.64179	0.98036
GtCCR4-3.0-EYFP	849	2.65672	0.971141
GtCCR4-3.0-EYFP	850	2.67164	0.968049
GtCCR4-3.0-EYFP	851	2.68657	0.967361
GtCCR4-3.0-EYFP	852	2.70149	0.964327
GtCCR4-3.0-EYFP	853	2.71642	0.965357
GtCCR4-3.0-EYFP	854	2.73134	0.962036
GtCCR4-3.0-EYFP	855	2.74627	0.967018
GtCCR4-3.0-EYFP	856	2.76119	0.973832
GtCCR4-3.0-EYFP	857	2.77612	0.987345
GtCCR4-3.0-EYFP	858	2.79104	1.00979
GtCCR4-3.0-EYFP	859	2.80597	1.02038
GtCCR4-3.0-EYFP	860	2.8209	1.02892
GtCCR4-3.0-EYFP	861	2.83582	1.03705
GtCCR4-3.0-EYFP	862	2.85075	1.0256
GtCCR4-3.0-EYFP	863	2.86567	1.01775
GtCCR4-3.0-EYFP	864	2.8806	1.01082
GtCCR4-3.0-EYFP	865	2.89552	1.002
GtCCR4-3.0-EYFP	866	2.91045	1.00126
GtCCR4-3.0-EYFP	867	2.92537	0.999027
GtCCR4-3.0-EYFP	868	2.9403	0.986143
GtCCR4-3.0-EYFP	869	2.95522	0.977897
GtCCR4-3.0-EYFP	870	2.97015	0.968793
GtCCR4-3.0-EYFP	871	2.98507	0.969766
GtCCR4-3.0-EYFP	872	3	0.972229
GtCCR4-3.0-EYFP	873	3.01493	0.975321
GtCCR4-3.0-EYFP	874	3.02985	0.973202
GtCCR4-3.0-EYFP	875	3.04478	0.973488
GtCCR4-3.0-EYFP	876	3.0597	0.984597
GtCCR4-3.0-EYFP	877	3.07463	0.990552
GtCCR4-3.0-EYFP	878	3.08955	1.0162
GtCCR4-3.0-EYFP	879	3.10448	1.02485
GtCCR4-3.0-EYFP	880	3.1194	1.02995
GtCCR4-3.0-EYFP	881	3.13433	1.03625
GtCCR4-3.0-EYFP	882	3.14925	1.03201
GtCCR4-3.0-EYFP	883	3.16418	1.02336
GtCCR4-3.0-EYFP	884	3.1791	1.01506
GtCCR4-3.0-EYFP	885	3.19403	1.00618
GtCCR4-3.0-EYFP	886	3.20896	1.00155
GtCCR4-3.0-EYFP	887	3.22388	0.9929
GtCCR4-3.0-EYFP	888	3.23881	0.987689
GtCCR4-3.0-EYFP	889	3.25373	0.9791
GtCCR4-3.0-EYFP	890	3.26866	0.972916
GtCCR4-3.0-EYFP	891	3.28358	0.969423
GtCCR4-3.0-EYFP	892	3.29851	0.965987
GtCCR4-3.0-EYFP	893	3.31343	0.969308
GtCCR4-3.0-EYFP	894	3.32836	0.967934
GtCCR4-3.0-EYFP	895	3.34328	0.974576
GtCCR4-3.0-EYFP	896	3.35821	0.978298
GtCCR4-3.0-EYFP	897	3.37313	0.99164
GtCCR4-3.0-EYFP	898	3.38806	1.01185
GtCCR4-3.0-EYFP	899	3.40299	1.02399
GtCCR4-3.0-EYFP	900	3.41791	1.02823
GtCCR4-3.0-EYFP	901	3.43284	1.04066
GtCCR4-3.0-EYFP	902	3.44776	1.02897
GtCCR4-3.0-EYFP	903	3.46269	1.0272
GtCCR4-3.0-EYFP	904	3.47761	1.01237
GtCCR4-3.0-EYFP	905	3.49254	1.00155
GtCCR4-3.0-EYFP	906	3.50746	0.999485
GtCCR4-3.0-EYFP	907	3.52239	0.995247
GtCCR4-3.0-EYFP	908	3.53731	0.990667
GtCCR4-3.0-EYFP	909	3.55224	0.976752
GtCCR4-3.0-EYFP	910	3.56716	0.971541
GtCCR4-3.0-EYFP	911	3.58209	0.966903
GtCCR4-3.0-EYFP	912	3.59701	0.964384
GtCCR4-3.0-EYFP	913	3.61194	0.962437
GtCCR4-3.0-EYFP	914	3.62687	0.965243
GtCCR4-3.0-EYFP	915	3.64179	0.968278
GtCCR4-3.0-EYFP	916	3.65672	0.97618
GtCCR4-3.0-EYFP	917	3.67164	0.988491
GtCCR4-3.0-EYFP	918	3.68657	1.00292
GtCCR4-3.0-EYFP	919	3.70149	1.02308
GtCCR4-3.0-EYFP	920	3.71642	1.02674
GtCCR4-3.0-EYFP	921	3.73134	1.03453
GtCCR4-3.0-EYFP	922	3.74627	1.0276
GtCCR4-3.0-EYFP	923	3.76119	1.01712
GtCCR4-3.0-EYFP	924	3.77612	1.00613
GtCCR4-3.0-EYFP	925	3.79104	0.998969
GtCCR4-3.0-EYFP	926	3.80597	0.999427
GtCCR4-3.0-EYFP	927	3.8209	0.995362
GtCCR4-3.0-EYFP	928	3.83582	0.992728
GtCCR4-3.0-EYFP	929	3.85075	0.979386
GtCCR4-3.0-EYFP	930	3.86567	0.977554
GtCCR4-3.0-EYFP	931	3.8806	0.973946
GtCCR4-3.0-EYFP	932	3.89552	0.9724
GtCCR4-3.0-EYFP	933	3.91045	0.970396
GtCCR4-3.0-EYFP	934	3.92537	0.974863
GtCCR4-3.0-EYFP	935	3.9403	0.976294
GtCCR4-3.0-EYFP	936	3.95522	0.980245
GtCCR4-3.0-EYFP	937	3.97015	0.991926
GtCCR4-3.0-EYFP	938	3.98507	1.00137
GtCCR4-3.0-EYFP	939	4	1.02262
GtCCR4-3.0-EYFP	940	4.01493	1.02943
GtCCR4-3.0-EYFP	941	4.02985	1.03917
GtCCR4-3.0-EYFP	942	4.04478	1.02869
GtCCR4-3.0-EYFP	943	4.0597	1.02966
GtCCR4-3.0-EYFP	944	4.07463	1.01678
GtCCR4-3.0-EYFP	945	4.08955	1.01689
GtCCR4-3.0-EYFP	946	4.10448	1.0063
GtCCR4-3.0-EYFP	947	4.1194	1.00092
GtCCR4-3.0-EYFP	948	4.13433	0.998397
GtCCR4-3.0-EYFP	949	4.14925	0.984883
GtCCR4-3.0-EYFP	950	4.16418	0.979844
GtCCR4-3.0-EYFP	951	4.1791	0.965701
GtCCR4-3.0-EYFP	952	4.19403	0.969194
GtCCR4-3.0-EYFP	953	4.20896	0.969308
GtCCR4-3.0-EYFP	954	4.22388	0.967132
GtCCR4-3.0-EYFP	955	4.23881	0.967419
GtCCR4-3.0-EYFP	956	4.25373	0.973546
GtCCR4-3.0-EYFP	957	4.26866	0.981333
GtCCR4-3.0-EYFP	958	4.28358	1.00899
GtCCR4-3.0-EYFP	959	4.29851	1.02245
GtCCR4-3.0-EYFP	960	4.31343	1.02829
GtCCR4-3.0-EYFP	961	4.32836	1.03516
GtCCR4-3.0-EYFP	962	4.34328	1.03063
GtCCR4-3.0-EYFP	963	4.35821	1.0221
GtCCR4-3.0-EYFP	964	4.37313	1.01288
GtCCR4-3.0-EYFP	965	4.38806	1.0047
GtCCR4-3.0-EYFP	966	4.40299	0.998568
GtCCR4-3.0-EYFP	967	4.41791	0.997996
GtCCR4-3.0-EYFP	968	4.43284	0.994847
GtCCR4-3.0-EYFP	969	4.44776	0.980417
GtCCR4-3.0-EYFP	970	4.46269	0.979043
GtCCR4-3.0-EYFP	971	4.47761	0.971828
GtCCR4-3.0-EYFP	972	4.49254	0.972458
GtCCR4-3.0-EYFP	973	4.50746	0.974404
GtCCR4-3.0-EYFP	974	4.52239	0.969366
GtCCR4-3.0-EYFP	975	4.53731	0.97429
GtCCR4-3.0-EYFP	976	4.55224	0.980818
GtCCR4-3.0-EYFP	977	4.56716	0.995763
GtCCR4-3.0-EYFP	978	4.58209	1.01666
GtCCR4-3.0-EYFP	979	4.59701	1.02863
GtCCR4-3.0-EYFP	980	4.61194	1.0331
GtCCR4-3.0-EYFP	981	4.62687	1.04003
GtCCR4-3.0-EYFP	982	4.64179	1.03081
GtCCR4-3.0-EYFP	983	4.65672	1.01598
GtCCR4-3.0-EYFP	984	4.67164	1.00538
GtCCR4-3.0-EYFP	985	4.68657	1.00263
GtCCR4-3.0-EYFP	986	4.70149	0.999313
GtCCR4-3.0-EYFP	987	4.71642	0.992957
GtCCR4-3.0-EYFP	988	4.73134	0.991525
GtCCR4-3.0-EYFP	989	4.74627	0.980073
GtCCR4-3.0-EYFP	990	4.76119	0.969537
GtCCR4-3.0-EYFP	991	4.77612	0.972629
GtCCR4-3.0-EYFP	992	4.79104	0.973889
GtCCR4-3.0-EYFP	993	4.80597	0.974519
GtCCR4-3.0-EYFP	994	4.8209	0.97303
GtCCR4-3.0-EYFP	995	4.83582	0.97847
GtCCR4-3.0-EYFP	996	4.85075	0.989464
GtCCR4-3.0-EYFP	997	4.86567	0.997194
GtCCR4-3.0-EYFP	998	4.8806	1.01827
GtCCR4-3.0-EYFP	999	4.89552	1.02943
GtCCR4-3.0-EYFP	1000	4.91045	1.03109
GtCCR4-3.0-EYFP	1001	4.92537	1.03006
GtCCR4-3.0-EYFP	1002	4.9403	1.02319
GtCCR4-3.0-EYFP	1003	4.95522	1.01306
GtCCR4-3.0-EYFP	1004	4.97015	1.00704
GtCCR4-3.0-EYFP	1005	4.98507	0.997022
GtCCR4-3.0-EYFP	1006	5	0.999771
GtCCR4-3.0-EYFP	1007	5.01493	0.994789
GtCCR4-3.0-EYFP	1008	5.02985	0.990609
GtCCR4-3.0-EYFP	1009	5.04478	0.982936
GtCCR4-3.0-EYFP	1010	5.0597	0.97492
GtCCR4-3.0-EYFP	1011	5.07463	0.971083
GtCCR4-3.0-EYFP	1012	5.08955	0.97177
GtCCR4-3.0-EYFP	1013	5.10448	0.972687
GtCCR4-3.0-EYFP	1014	5.1194	0.974404
GtCCR4-3.0-EYFP	1015	5.13433	0.982249
GtCCR4-3.0-EYFP	1016	5.14925	0.99038
GtCCR4-3.0-EYFP	1017	5.16418	1.01523
GtCCR4-3.0-EYFP	1018	5.1791	1.02983
GtCCR4-3.0-EYFP	1019	5.19403	1.03155
GtCCR4-3.0-EYFP	1020	5.20896	1.03201
GtCCR4-3.0-EYFP	1021	5.22388	1.02514
GtCCR4-3.0-EYFP	1022	5.23881	1.01764
GtCCR4-3.0-EYFP	1023	5.25373	1.00704
GtCCR4-3.0-EYFP	1024	5.26866	0.999313
GtCCR4-3.0-EYFP	1025	5.28358	0.996793
GtCCR4-3.0-EYFP	1026	5.29851	0.995934
GtCCR4-3.0-EYFP	1027	5.31343	0.991754
GtCCR4-3.0-EYFP	1028	5.32836	0.981448
GtCCR4-3.0-EYFP	1029	5.34328	0.978355
GtCCR4-3.0-EYFP	1030	5.35821	0.970568
GtCCR4-3.0-EYFP	1031	5.37313	0.971255
GtCCR4-3.0-EYFP	1032	5.38806	0.975435
GtCCR4-3.0-EYFP	1033	5.40299	0.974634
GtCCR4-3.0-EYFP	1034	5.41791	0.980989
GtCCR4-3.0-EYFP	1035	5.43284	0.989235
GtCCR4-3.0-EYFP	1036	5.44776	1.00538
GtCCR4-3.0-EYFP	1037	5.46269	1.0229
GtCCR4-3.0-EYFP	1038	5.47761	1.03842
GtCCR4-3.0-EYFP	1039	5.49254	1.04323
GtCCR4-3.0-EYFP	1040	5.50746	1.03991
GtCCR4-3.0-EYFP	1041	5.52239	1.03585
GtCCR4-3.0-EYFP	1042	5.53731	1.02187
GtCCR4-3.0-EYFP	1043	5.55224	1.00767
GtCCR4-3.0-EYFP	1044	5.56716	1.0024
GtCCR4-3.0-EYFP	1045	5.58209	0.998225
GtCCR4-3.0-EYFP	1046	5.59701	0.992613
GtCCR4-3.0-EYFP	1047	5.61194	0.982707
GtCCR4-3.0-EYFP	1048	5.62687	0.973431
GtCCR4-3.0-EYFP	1049	5.64179	0.970282
GtCCR4-3.0-EYFP	1050	5.65672	0.970282
GtCCR4-3.0-EYFP	1051	5.67164	0.971656
GtCCR4-3.0-EYFP	1052	5.68657	0.968907
GtCCR4-3.0-EYFP	1053	5.70149	0.97074
GtCCR4-3.0-EYFP	1054	5.71642	0.970396
GtCCR4-3.0-EYFP	1055	5.73134	0.988033
GtCCR4-3.0-EYFP	1056	5.74627	1.01048
GtCCR4-3.0-EYFP	1057	5.76119	1.02731
GtCCR4-3.0-EYFP	1058	5.77612	1.0335
GtCCR4-3.0-EYFP	1059	5.79104	1.03785
GtCCR4-3.0-EYFP	1060	5.80597	1.04071
GtCCR4-3.0-EYFP	1061	5.8209	1.03006
GtCCR4-3.0-EYFP	1062	5.83582	1.02382
GtCCR4-3.0-EYFP	1063	5.85075	1.01443
GtCCR4-3.0-EYFP	1064	5.86567	1.01202
GtCCR4-3.0-EYFP	1065	5.8806	1.00269
GtCCR4-3.0-EYFP	1066	5.89552	0.998626
GtCCR4-3.0-EYFP	1067	5.91045	0.985914
GtCCR4-3.0-EYFP	1068	5.92537	0.97177
GtCCR4-3.0-EYFP	1069	5.9403	0.968507
GtCCR4-3.0-EYFP	1070	5.95522	0.967361
GtCCR4-3.0-EYFP	1071	5.97015	0.966789
GtCCR4-3.0-EYFP	1072	5.98507	0.967648
GtCCR4-3.0-EYFP	1073	6	0.967018
GtCCR4-3.0-EYFP	1074	6.01493	0.984425
GtCCR4-3.0-EYFP	1075	6.02985	0.997767
GtCCR4-3.0-EYFP	1076	6.04478	1.02056
GtCCR4-3.0-EYFP	1077	6.0597	1.02909
GtCCR4-3.0-EYFP	1078	6.07463	1.03899
GtCCR4-3.0-EYFP	1079	6.08955	1.03573
GtCCR4-3.0-EYFP	1080	6.10448	1.02892
GtCCR4-3.0-EYFP	1081	6.1194	1.0225
GtCCR4-3.0-EYFP	1082	6.13433	1.00819
GtCCR4-3.0-EYFP	1083	6.14925	1.00046
GtCCR4-3.0-EYFP	1084	6.16418	1.00223
GtCCR4-3.0-EYFP	1085	6.1791	0.999084
GtCCR4-3.0-EYFP	1086	6.19403	0.989579
GtCCR4-3.0-EYFP	1087	6.20896	0.976351
GtCCR4-3.0-EYFP	1088	6.22388	0.971484
GtCCR4-3.0-EYFP	1089	6.23881	0.968965
GtCCR4-3.0-EYFP	1090	6.25373	0.968736
GtCCR4-3.0-EYFP	1091	6.26866	0.969251
GtCCR4-3.0-EYFP	1092	6.28358	0.967533
GtCCR4-3.0-EYFP	1093	6.29851	0.976008
GtCCR4-3.0-EYFP	1094	6.31343	0.994904
GtCCR4-3.0-EYFP	1095	6.32836	1.01454
GtCCR4-3.0-EYFP	1096	6.34328	1.03018
GtCCR4-3.0-EYFP	1097	6.35821	1.03149
GtCCR4-3.0-EYFP	1098	6.37313	1.04403
GtCCR4-3.0-EYFP	1099	6.38806	1.03516
GtCCR4-3.0-EYFP	1100	6.40299	1.02537
GtCCR4-3.0-EYFP	1101	6.41791	1.01008
GtCCR4-3.0-EYFP	1102	6.43284	1.00699
GtCCR4-3.0-EYFP	1103	6.44776	0.998855
GtCCR4-3.0-EYFP	1104	6.46269	0.994102
GtCCR4-3.0-EYFP	1105	6.47761	0.994732
GtCCR4-3.0-EYFP	1106	6.49254	0.982936
GtCCR4-3.0-EYFP	1107	6.50746	0.971141
GtCCR4-3.0-EYFP	1108	6.52239	0.966789
GtCCR4-3.0-EYFP	1109	6.53731	0.966503
GtCCR4-3.0-EYFP	1110	6.55224	0.967476
GtCCR4-3.0-EYFP	1111	6.56716	0.971942
GtCCR4-3.0-EYFP	1112	6.58209	0.966445
GtCCR4-3.0-EYFP	1113	6.59701	0.976981
GtCCR4-3.0-EYFP	1114	6.61194	0.987803
GtCCR4-3.0-EYFP	1115	6.62687	1.01477
GtCCR4-3.0-EYFP	1116	6.64179	1.02514
GtCCR4-3.0-EYFP	1117	6.65672	1.03722
GtCCR4-3.0-EYFP	1118	6.67164	1.03201
GtCCR4-3.0-EYFP	1119	6.68657	1.02863
GtCCR4-3.0-EYFP	1120	6.70149	1.01672
GtCCR4-3.0-EYFP	1121	6.71642	1.00973
GtCCR4-3.0-EYFP	1122	6.73134	0.998568
GtCCR4-3.0-EYFP	1123	6.74627	0.998683
GtCCR4-3.0-EYFP	1124	6.76119	0.989922
GtCCR4-3.0-EYFP	1125	6.77612	0.985055
GtCCR4-3.0-EYFP	1126	6.79104	0.977955
GtCCR4-3.0-EYFP	1127	6.80597	0.969022
GtCCR4-3.0-EYFP	1128	6.8209	0.966789
GtCCR4-3.0-EYFP	1129	6.83582	0.96656
GtCCR4-3.0-EYFP	1130	6.85075	0.968621
GtCCR4-3.0-EYFP	1131	6.86567	0.964269
GtCCR4-3.0-EYFP	1132	6.8806	0.96885
GtCCR4-3.0-EYFP	1133	6.89552	0.981906
GtCCR4-3.0-EYFP	1134	6.91045	0.995534
GtCCR4-3.0-EYFP	1135	6.92537	1.01512
GtCCR4-3.0-EYFP	1136	6.9403	1.02789
GtCCR4-3.0-EYFP	1137	6.95522	1.03115
GtCCR4-3.0-EYFP	1138	6.97015	1.03069
GtCCR4-3.0-EYFP	1139	6.98507	1.0343
GtCCR4-3.0-EYFP	1140	7	1.02073
GtCCR4-3.0-EYFP	1141	7.01493	1.01094
GtCCR4-3.0-EYFP	1142	7.02985	0.998626
GtCCR4-3.0-EYFP	1143	7.04478	1.00034
GtCCR4-3.0-EYFP	1144	7.0597	0.98912
GtCCR4-3.0-EYFP	1145	7.07463	0.98454
GtCCR4-3.0-EYFP	1146	7.08955	0.972629
GtCCR4-3.0-EYFP	1147	7.10448	0.970854
GtCCR4-3.0-EYFP	1148	7.1194	0.967705
GtCCR4-3.0-EYFP	1149	7.13433	0.966961
GtCCR4-3.0-EYFP	1150	7.14925	0.969366
GtCCR4-3.0-EYFP	1151	7.16418	0.969366
GtCCR4-3.0-EYFP	1152	7.1791	0.966102
GtCCR4-3.0-EYFP	1153	7.19403	0.979902
GtCCR4-3.0-EYFP	1154	7.20896	0.990838
GtCCR4-3.0-EYFP	1155	7.22388	1.01552
GtCCR4-3.0-EYFP	1156	7.23881	1.02525
GtCCR4-3.0-EYFP	1157	7.25373	1.03247
GtCCR4-3.0-EYFP	1158	7.26866	1.03819
GtCCR4-3.0-EYFP	1159	7.28358	1.03384
GtCCR4-3.0-EYFP	1160	7.29851	1.02445
GtCCR4-3.0-EYFP	1161	7.31343	1.01294
GtCCR4-3.0-EYFP	1162	7.32836	1.00046
GtCCR4-3.0-EYFP	1163	7.34328	1.00057
GtCCR4-3.0-EYFP	1164	7.35821	0.989979
GtCCR4-3.0-EYFP	1165	7.37313	0.983223
GtCCR4-3.0-EYFP	1166	7.38806	0.972572
GtCCR4-3.0-EYFP	1167	7.40299	0.970683
GtCCR4-3.0-EYFP	1168	7.41791	0.968621
GtCCR4-3.0-EYFP	1169	7.43284	0.965873
GtCCR4-3.0-EYFP	1170	7.44776	0.96948
GtCCR4-3.0-EYFP	1171	7.46269	0.970167
GtCCR4-3.0-EYFP	1172	7.47761	0.976981
GtCCR4-3.0-EYFP	1173	7.49254	0.985914
GtCCR4-3.0-EYFP	1174	7.50746	0.997595
GtCCR4-3.0-EYFP	1175	7.52239	1.02411
GtCCR4-3.0-EYFP	1176	7.53731	1.03459
GtCCR4-3.0-EYFP	1177	7.55224	1.03768
GtCCR4-3.0-EYFP	1178	7.56716	1.03567
GtCCR4-3.0-EYFP	1179	7.58209	1.02949
GtCCR4-3.0-EYFP	1180	7.59701	1.02113
GtCCR4-3.0-EYFP	1181	7.61194	1.01626
GtCCR4-3.0-EYFP	1182	7.62687	1.0075
GtCCR4-3.0-EYFP	1183	7.64179	0.997366
GtCCR4-3.0-EYFP	1184	7.65672	0.990495
GtCCR4-3.0-EYFP	1185	7.67164	0.980302
GtCCR4-3.0-EYFP	1186	7.68657	0.970683
GtCCR4-3.0-EYFP	1187	7.70149	0.968621
GtCCR4-3.0-EYFP	1188	7.71642	0.962895
GtCCR4-3.0-EYFP	1189	7.73134	0.961292
GtCCR4-3.0-EYFP	1190	7.74627	0.964212
GtCCR4-3.0-EYFP	1191	7.76119	0.966388
GtCCR4-3.0-EYFP	1192	7.77612	0.970568
GtCCR4-3.0-EYFP	1193	7.79104	0.984311
GtCCR4-3.0-EYFP	1194	7.80597	1.00246
GtCCR4-3.0-EYFP	1195	7.8209	1.02273
GtCCR4-3.0-EYFP	1196	7.83582	1.02983
GtCCR4-3.0-EYFP	1197	7.85075	1.04128
GtCCR4-3.0-EYFP	1198	7.86567	1.03218
GtCCR4-3.0-EYFP	1199	7.8806	1.02915
GtCCR4-3.0-EYFP	1200	7.89552	1.01369
GtCCR4-3.0-EYFP	1201	7.91045	1.00515
GtCCR4-3.0-EYFP	1202	7.92537	1.00206
GtCCR4-3.0-EYFP	1203	7.9403	0.996106
GtCCR4-3.0-EYFP	1204	7.95522	0.993873
GtCCR4-3.0-EYFP	1205	7.97015	0.981161
GtCCR4-3.0-EYFP	1206	7.98507	0.976409
GtCCR4-3.0-EYFP	1207	8	0.973202
GtCCR4-3.0-EYFP	1208	8.01493	0.967991
GtCCR4-3.0-EYFP	1209	8.02985	0.967018
GtCCR4-3.0-EYFP	1210	8.04478	0.964556
GtCCR4-3.0-EYFP	1211	8.0597	0.970396
GtCCR4-3.0-EYFP	1212	8.07463	0.973488
GtCCR4-3.0-EYFP	1213	8.08955	0.985799
GtCCR4-3.0-EYFP	1214	8.10448	1.01248
GtCCR4-3.0-EYFP	1215	8.1194	1.02462
GtCCR4-3.0-EYFP	1216	8.13433	1.02943
GtCCR4-3.0-EYFP	1217	8.14925	1.03201
GtCCR4-3.0-EYFP	1218	8.16418	1.028
GtCCR4-3.0-EYFP	1219	8.1791	1.01449
GtCCR4-3.0-EYFP	1220	8.19403	1.01111
GtCCR4-3.0-EYFP	1221	8.20896	1.0047
GtCCR4-3.0-EYFP	1222	8.22388	0.997595
GtCCR4-3.0-EYFP	1223	8.23881	0.991296
GtCCR4-3.0-EYFP	1224	8.25373	0.990896
GtCCR4-3.0-EYFP	1225	8.26866	0.978928
GtCCR4-3.0-EYFP	1226	8.28358	0.975435
GtCCR4-3.0-EYFP	1227	8.29851	0.977382
GtCCR4-3.0-EYFP	1228	8.31343	0.973717
GtCCR4-3.0-EYFP	1229	8.32836	0.975893
GtCCR4-3.0-EYFP	1230	8.34328	0.979787
GtCCR4-3.0-EYFP	1231	8.35821	0.97658
GtCCR4-3.0-EYFP	1232	8.37313	0.982077
GtCCR4-3.0-EYFP	1233	8.38806	0.994159
GtCCR4-3.0-EYFP	1234	8.40299	1.01741
GtCCR4-3.0-EYFP	1235	8.41791	1.02708
GtCCR4-3.0-EYFP	1236	8.43284	1.03424
GtCCR4-3.0-EYFP	1237	8.44776	1.03836
GtCCR4-3.0-EYFP	1238	8.46269	1.03075
GtCCR4-3.0-EYFP	1239	8.47761	1.01798
GtCCR4-3.0-EYFP	1240	8.49254	1.00928
GtCCR4-3.0-EYFP	1241	8.50746	1.00143
GtCCR4-3.0-EYFP	1242	8.52239	1.00206
GtCCR4-3.0-EYFP	1243	8.53731	0.993014
GtCCR4-3.0-EYFP	1244	8.55224	0.989865
GtCCR4-3.0-EYFP	1245	8.56716	0.972744
GtCCR4-3.0-EYFP	1246	8.58209	0.971713
GtCCR4-3.0-EYFP	1247	8.59701	0.9724
GtCCR4-3.0-EYFP	1248	8.61194	0.973775
GtCCR4-3.0-EYFP	1249	8.62687	0.969938
GtCCR4-3.0-EYFP	1250	8.64179	0.970625
GtCCR4-3.0-EYFP	1251	8.65672	0.970969
GtCCR4-3.0-EYFP	1252	8.67164	0.981906
GtCCR4-3.0-EYFP	1253	8.68657	0.995648
GtCCR4-3.0-EYFP	1254	8.70149	1.01689
GtCCR4-3.0-EYFP	1255	8.71642	1.02319
GtCCR4-3.0-EYFP	1256	8.73134	1.0296
GtCCR4-3.0-EYFP	1257	8.74627	1.0272
GtCCR4-3.0-EYFP	1258	8.76119	1.0213
GtCCR4-3.0-EYFP	1259	8.77612	1.01552
GtCCR4-3.0-EYFP	1260	8.79104	1.0075
GtCCR4-3.0-EYFP	1261	8.80597	1.00103
GtCCR4-3.0-EYFP	1262	8.8209	0.996221
GtCCR4-3.0-EYFP	1263	8.83582	0.991468
GtCCR4-3.0-EYFP	1264	8.85075	0.983623
GtCCR4-3.0-EYFP	1265	8.86567	0.975893
GtCCR4-3.0-EYFP	1266	8.8806	0.971255
GtCCR4-3.0-EYFP	1267	8.89552	0.969022
GtCCR4-3.0-EYFP	1268	8.91045	0.972916
GtCCR4-3.0-EYFP	1269	8.92537	0.96822
GtCCR4-3.0-EYFP	1270	8.9403	0.969824
GtCCR4-3.0-EYFP	1271	8.95522	0.972171
GtCCR4-3.0-EYFP	1272	8.97015	0.982364
GtCCR4-3.0-EYFP	1273	8.98507	1.01426
GtCCR4-3.0-EYFP	1274	9	1.02474
GtCCR4-3.0-EYFP	1275	9.01493	1.03138
GtCCR4-3.0-EYFP	1276	9.02985	1.0327
GtCCR4-3.0-EYFP	1277	9.04478	1.02726
GtCCR4-3.0-EYFP	1278	9.0597	1.01907
GtCCR4-3.0-EYFP	1279	9.07463	1.01288
GtCCR4-3.0-EYFP	1280	9.08955	1.00624
GtCCR4-3.0-EYFP	1281	9.10448	0.995705
GtCCR4-3.0-EYFP	1282	9.1194	0.992842
GtCCR4-3.0-EYFP	1283	9.13433	0.989693
GtCCR4-3.0-EYFP	1284	9.14925	0.97721
GtCCR4-3.0-EYFP	1285	9.16418	0.972171
GtCCR4-3.0-EYFP	1286	9.1791	0.970167
GtCCR4-3.0-EYFP	1287	9.19403	0.967476
GtCCR4-3.0-EYFP	1288	9.20896	0.96719
GtCCR4-3.0-EYFP	1289	9.22388	0.96885
GtCCR4-3.0-EYFP	1290	9.23881	0.974748
GtCCR4-3.0-EYFP	1291	9.25373	0.981104
GtCCR4-3.0-EYFP	1292	9.26866	0.990667
GtCCR4-3.0-EYFP	1293	9.28358	1.01397
GtCCR4-3.0-EYFP	1294	9.29851	1.02508
GtCCR4-3.0-EYFP	1295	9.31343	1.0296
GtCCR4-3.0-EYFP	1296	9.32836	1.03441
GtCCR4-3.0-EYFP	1297	9.34328	1.02325
GtCCR4-3.0-EYFP	1298	9.35821	1.01523
GtCCR4-3.0-EYFP	1299	9.37313	1.00681
GtCCR4-3.0-EYFP	1300	9.38806	0.994503
GtCCR4-3.0-EYFP	1301	9.40299	0.997137
GtCCR4-3.0-EYFP	1302	9.41791	0.989636
GtCCR4-3.0-EYFP	1303	9.43284	0.98454
GtCCR4-3.0-EYFP	1304	9.44776	0.97366
GtCCR4-3.0-EYFP	1305	9.46269	0.969595
GtCCR4-3.0-EYFP	1306	9.47761	0.967304
GtCCR4-3.0-EYFP	1307	9.49254	0.96593
GtCCR4-3.0-EYFP	1308	9.50746	0.96656
GtCCR4-3.0-EYFP	1309	9.52239	0.970282
GtCCR4-3.0-EYFP	1310	9.53731	0.969022
GtCCR4-3.0-EYFP	1311	9.55224	0.984597
GtCCR4-3.0-EYFP	1312	9.56716	1.00401
GtCCR4-3.0-EYFP	1313	9.58209	1.0193
GtCCR4-3.0-EYFP	1314	9.59701	1.02411
GtCCR4-3.0-EYFP	1315	9.61194	1.03373
GtCCR4-3.0-EYFP	1316	9.62687	1.02623
GtCCR4-3.0-EYFP	1317	9.64179	1.01872
GtCCR4-3.0-EYFP	1318	9.65672	1.00922
GtCCR4-3.0-EYFP	1319	9.67164	1.0051
GtCCR4-3.0-EYFP	1320	9.68657	0.995591
GtCCR4-3.0-EYFP	1321	9.70149	0.99227
GtCCR4-3.0-EYFP	1322	9.71642	0.988662
GtCCR4-3.0-EYFP	1323	9.73134	0.980818
GtCCR4-3.0-EYFP	1324	9.74627	0.972057
GtCCR4-3.0-EYFP	1325	9.76119	0.971026
GtCCR4-3.0-EYFP	1326	9.77612	0.973889
GtCCR4-3.0-EYFP	1327	9.79104	0.97429
GtCCR4-3.0-EYFP	1328	9.80597	0.976122
GtCCR4-3.0-EYFP	1329	9.8209	0.976065
GtCCR4-3.0-EYFP	1330	9.83582	0.976638
GtCCR4-3.0-EYFP	1331	9.85075	0.992384
GtCCR4-3.0-EYFP	1332	9.86567	1.00865
GtCCR4-3.0-EYFP	1333	9.8806	1.02239
GtCCR4-3.0-EYFP	1334	9.89552	1.02886
GtCCR4-3.0-EYFP	1335	9.91045	1.03355
GtCCR4-3.0-EYFP	1336	9.92537	1.02617
GtCCR4-3.0-EYFP	1337	9.9403	1.01672
GtCCR4-3.0-EYFP	1338	9.95522	1.00836
GtCCR4-3.0-EYFP	1339	9.97015	0.996049
GtCCR4-3.0-EYFP	1340	9.98507	0.996335
GtCCR4-3.0-EYFP	1341	10	0.992556
GtCCR4-3.0-EYFP	1342	10.0149	0.991583
GtCCR4-3.0-EYFP	1343	10.0299	0.980531
GtCCR4-3.0-EYFP	1344	10.0448	0.972973
GtCCR4-3.0-EYFP	1345	10.0597	0.965701
GtCCR4-3.0-EYFP	1346	10.0746	0.967648
GtCCR4-3.0-EYFP	1347	10.0896	0.970683
GtCCR4-3.0-EYFP	1348	10.1045	0.963983
GtCCR4-3.0-EYFP	1349	10.1194	0.972057
GtCCR4-3.0-EYFP	1350	10.1343	0.978928
GtCCR4-3.0-EYFP	1351	10.1493	0.998454
GtCCR4-3.0-EYFP	1352	10.1642	1.01867
GtCCR4-3.0-EYFP	1353	10.1791	1.0264
GtCCR4-3.0-EYFP	1354	10.194	1.03625
GtCCR4-3.0-EYFP	1355	10.209	1.03367
GtCCR4-3.0-EYFP	1356	10.2239	1.02731
GtCCR4-3.0-EYFP	1357	10.2388	1.01391
GtCCR4-3.0-EYFP	1358	10.2537	1.00647
GtCCR4-3.0-EYFP	1359	10.2687	1.00074
GtCCR4-3.0-EYFP	1360	10.2836	0.996221
GtCCR4-3.0-EYFP	1361	10.2985	0.991354
GtCCR4-3.0-EYFP	1362	10.3134	0.982765
GtCCR4-3.0-EYFP	1363	10.3284	0.971141
GtCCR4-3.0-EYFP	1364	10.3433	0.966216
GtCCR4-3.0-EYFP	1365	10.3582	0.966732
GtCCR4-3.0-EYFP	1366	10.3731	0.966102
GtCCR4-3.0-EYFP	1367	10.3881	0.968621
GtCCR4-3.0-EYFP	1368	10.403	0.970282
GtCCR4-3.0-EYFP	1369	10.4179	0.980073
GtCCR4-3.0-EYFP	1370	10.4328	0.986658
GtCCR4-3.0-EYFP	1371	10.4478	1.01546
GtCCR4-3.0-EYFP	1372	10.4627	1.02588
GtCCR4-3.0-EYFP	1373	10.4776	1.03104
GtCCR4-3.0-EYFP	1374	10.4925	1.03751
GtCCR4-3.0-EYFP	1375	10.5075	1.03132
GtCCR4-3.0-EYFP	1376	10.5224	1.01998
GtCCR4-3.0-EYFP	1377	10.5373	1.01391
GtCCR4-3.0-EYFP	1378	10.5522	1.00412
GtCCR4-3.0-EYFP	1379	10.5672	1.00578
GtCCR4-3.0-EYFP	1380	10.5821	0.995419
GtCCR4-3.0-EYFP	1381	10.597	0.989865
GtCCR4-3.0-EYFP	1382	10.6119	0.976752
GtCCR4-3.0-EYFP	1383	10.6269	0.970969
GtCCR4-3.0-EYFP	1384	10.6418	0.969079
GtCCR4-3.0-EYFP	1385	10.6567	0.966961
GtCCR4-3.0-EYFP	1386	10.6716	0.964785
GtCCR4-3.0-EYFP	1387	10.6866	0.965529
GtCCR4-3.0-EYFP	1388	10.7015	0.972572
GtCCR4-3.0-EYFP	1389	10.7164	0.98328
GtCCR4-3.0-EYFP	1390	10.7313	0.998683
GtCCR4-3.0-EYFP	1391	10.7463	1.02296
GtCCR4-3.0-EYFP	1392	10.7612	1.03733
GtCCR4-3.0-EYFP	1393	10.7761	1.04272
GtCCR4-3.0-EYFP	1394	10.791	1.03676
GtCCR4-3.0-EYFP	1395	10.806	1.02708
GtCCR4-3.0-EYFP	1396	10.8209	1.0193
GtCCR4-3.0-EYFP	1397	10.8358	1.01231
GtCCR4-3.0-EYFP	1398	10.8507	1.00601
GtCCR4-3.0-EYFP	1399	10.8657	0.998568
GtCCR4-3.0-EYFP	1400	10.8806	0.990552
GtCCR4-3.0-EYFP	1401	10.8955	0.984196
GtCCR4-3.0-EYFP	1402	10.9104	0.977325
GtCCR4-3.0-EYFP	1403	10.9254	0.969366
GtCCR4-3.0-EYFP	1404	10.9403	0.968507
GtCCR4-3.0-EYFP	1405	10.9552	0.964956
GtCCR4-3.0-EYFP	1406	10.9701	0.96822
GtCCR4-3.0-EYFP	1407	10.9851	0.968335
GtCCR4-3.0-EYFP	1408	11	0.973317
GtCCR4-3.0-EYFP	1409	11.0149	0.985857
GtCCR4-3.0-EYFP	1410	11.0299	1.00349
GtCCR4-3.0-EYFP	1411	11.0448	1.02514
GtCCR4-3.0-EYFP	1412	11.0597	1.03046
GtCCR4-3.0-EYFP	1413	11.0746	1.03859
GtCCR4-3.0-EYFP	1414	11.0896	1.02983
GtCCR4-3.0-EYFP	1415	11.1045	1.0201
GtCCR4-3.0-EYFP	1416	11.1194	1.01569
GtCCR4-3.0-EYFP	1417	11.1343	1.01002
GtCCR4-3.0-EYFP	1418	11.1493	1.00092
GtCCR4-3.0-EYFP	1419	11.1642	1.00109
GtCCR4-3.0-EYFP	1420	11.1791	0.991984
GtCCR4-3.0-EYFP	1421	11.194	0.985284
GtCCR4-3.0-EYFP	1422	11.209	0.977554
GtCCR4-3.0-EYFP	1423	11.2239	0.970854
GtCCR4-3.0-EYFP	1424	11.2388	0.968907
GtCCR4-3.0-EYFP	1425	11.2537	0.966159
GtCCR4-3.0-EYFP	1426	11.2687	0.962322
GtCCR4-3.0-EYFP	1427	11.2836	0.970339
GtCCR4-3.0-EYFP	1428	11.2985	0.971599
GtCCR4-3.0-EYFP	1429	11.3134	0.986315
GtCCR4-3.0-EYFP	1430	11.3284	1.0059
GtCCR4-3.0-EYFP	1431	11.3433	1.02445
GtCCR4-3.0-EYFP	1432	11.3582	1.03138
GtCCR4-3.0-EYFP	1433	11.3731	1.03321
GtCCR4-3.0-EYFP	1434	11.3881	1.02382
GtCCR4-3.0-EYFP	1435	11.403	1.02124
GtCCR4-3.0-EYFP	1436	11.4179	1.01139
GtCCR4-3.0-EYFP	1437	11.4328	1.00578
GtCCR4-3.0-EYFP	1438	11.4478	0.996278
GtCCR4-3.0-EYFP	1439	11.4627	0.994617
GtCCR4-3.0-EYFP	1440	11.4776	0.989292
GtCCR4-3.0-EYFP	1441	11.4925	0.979443
GtCCR4-3.0-EYFP	1442	11.5075	0.970511
GtCCR4-3.0-EYFP	1443	11.5224	0.967247
GtCCR4-3.0-EYFP	1444	11.5373	0.970797
GtCCR4-3.0-EYFP	1445	11.5522	0.968106
GtCCR4-3.0-EYFP	1446	11.5672	0.96948
GtCCR4-3.0-EYFP	1447	11.5821	0.974977
GtCCR4-3.0-EYFP	1448	11.597	0.982879
GtCCR4-3.0-EYFP	1449	11.6119	0.99456
GtCCR4-3.0-EYFP	1450	11.6269	1.01575
GtCCR4-3.0-EYFP	1451	11.6418	1.02502
GtCCR4-3.0-EYFP	1452	11.6567	1.03006
GtCCR4-3.0-EYFP	1453	11.6716	1.03281
GtCCR4-3.0-EYFP	1454	11.6866	1.02789
GtCCR4-3.0-EYFP	1455	11.7015	1.01746
GtCCR4-3.0-EYFP	1456	11.7164	1.01265
GtCCR4-3.0-EYFP	1457	11.7313	1.00899
GtCCR4-3.0-EYFP	1458	11.7463	1.00366
GtCCR4-3.0-EYFP	1459	11.7612	0.993014
GtCCR4-3.0-EYFP	1460	11.7761	0.987174
GtCCR4-3.0-EYFP	1461	11.791	0.974576
GtCCR4-3.0-EYFP	1462	11.806	0.965415
GtCCR4-3.0-EYFP	1463	11.8209	0.966388
GtCCR4-3.0-EYFP	1464	11.8358	0.96822
GtCCR4-3.0-EYFP	1465	11.8507	0.966159
GtCCR4-3.0-EYFP	1466	11.8657	0.968049
GtCCR4-3.0-EYFP	1467	11.8806	0.972629
GtCCR4-3.0-EYFP	1468	11.8955	0.985341
GtCCR4-3.0-EYFP	1469	11.9104	1.00847
GtCCR4-3.0-EYFP	1470	11.9254	1.0229
GtCCR4-3.0-EYFP	1471	11.9403	1.03401
GtCCR4-3.0-EYFP	1472	11.9552	1.04329
GtCCR4-3.0-EYFP	1473	11.9701	1.03132
GtCCR4-3.0-EYFP	1474	11.9851	1.02399
GtCCR4-3.0-EYFP	1475	12	1.02056
GtCCR4-3.0-EYFP	1476	12.0149	1.01002
GtCCR4-3.0-EYFP	1477	12.0299	1.00315
GtCCR4-3.0-EYFP	1478	12.0448	0.991239
GtCCR4-3.0-EYFP	1479	12.0597	0.987632
GtCCR4-3.0-EYFP	1480	12.0746	0.97618
GtCCR4-3.0-EYFP	1481	12.0896	0.970969
GtCCR4-3.0-EYFP	1482	12.1045	0.963582
GtCCR4-3.0-EYFP	1483	12.1194	0.965873
GtCCR4-3.0-EYFP	1484	12.1343	0.964613
GtCCR4-3.0-EYFP	1485	12.1493	0.964785
GtCCR4-3.0-EYFP	1486	12.1642	0.968564
GtCCR4-3.0-EYFP	1487	12.1791	0.981219
GtCCR4-3.0-EYFP	1488	12.194	0.99101
GtCCR4-3.0-EYFP	1489	12.209	1.01254
GtCCR4-3.0-EYFP	1490	12.2239	1.02617
GtCCR4-3.0-EYFP	1491	12.2388	1.03029
GtCCR4-3.0-EYFP	1492	12.2537	1.03092
GtCCR4-3.0-EYFP	1493	12.2687	1.02771
GtCCR4-3.0-EYFP	1494	12.2836	1.01569
GtCCR4-3.0-EYFP	1495	12.2985	1.0063
GtCCR4-3.0-EYFP	1496	12.3134	1.00819
GtCCR4-3.0-EYFP	1497	12.3284	1.0063
GtCCR4-3.0-EYFP	1498	12.3433	0.990724
GtCCR4-3.0-EYFP	1499	12.3582	0.986544
GtCCR4-3.0-EYFP	1500	12.3731	0.976294
GtCCR4-3.0-EYFP	1501	12.3881	0.978355
GtCCR4-3.0-EYFP	1502	12.403	0.979157
GtCCR4-3.0-EYFP	1503	12.4179	0.973202
GtCCR4-3.0-EYFP	1504	12.4328	0.974748
GtCCR4-3.0-EYFP	1505	12.4478	0.97366
GtCCR4-3.0-EYFP	1506	12.4627	0.97555
GtCCR4-3.0-EYFP	1507	12.4776	0.985971
GtCCR4-3.0-EYFP	1508	12.4925	1.01048
GtCCR4-3.0-EYFP	1509	12.5075	1.02508
GtCCR4-3.0-EYFP	1510	12.5224	1.03522
GtCCR4-3.0-EYFP	1511	12.5373	1.04203
GtCCR4-3.0-EYFP	1512	12.5522	1.03104
GtCCR4-3.0-EYFP	1513	12.5672	1.02462
GtCCR4-3.0-EYFP	1514	12.5821	1.01483
GtCCR4-3.0-EYFP	1515	12.597	1.00487
GtCCR4-3.0-EYFP	1516	12.6119	0.99937
GtCCR4-3.0-EYFP	1517	12.6269	0.996965
GtCCR4-3.0-EYFP	1518	12.6418	0.99101
GtCCR4-3.0-EYFP	1519	12.6567	0.97618
GtCCR4-3.0-EYFP	1520	12.6716	0.974576
GtCCR4-3.0-EYFP	1521	12.6866	0.970053
GtCCR4-3.0-EYFP	1522	12.7015	0.973431
GtCCR4-3.0-EYFP	1523	12.7164	0.975435
GtCCR4-3.0-EYFP	1524	12.7313	0.97137
GtCCR4-3.0-EYFP	1525	12.7463	0.974462
GtCCR4-3.0-EYFP	1526	12.7612	0.988433
GtCCR4-3.0-EYFP	1527	12.7761	1.00281
GtCCR4-3.0-EYFP	1528	12.791	1.02044
GtCCR4-3.0-EYFP	1529	12.806	1.03562
GtCCR4-3.0-EYFP	1530	12.8209	1.04151
GtCCR4-3.0-EYFP	1531	12.8358	1.03636
GtCCR4-3.0-EYFP	1532	12.8507	1.02955
GtCCR4-3.0-EYFP	1533	12.8657	1.02079
GtCCR4-3.0-EYFP	1534	12.8806	1.01111
GtCCR4-3.0-EYFP	1535	12.8955	1.00475
GtCCR4-3.0-EYFP	1536	12.9104	1.00303
GtCCR4-3.0-EYFP	1537	12.9254	0.995705
GtCCR4-3.0-EYFP	1538	12.9403	0.989808
GtCCR4-3.0-EYFP	1539	12.9552	0.976122
GtCCR4-3.0-EYFP	1540	12.9701	0.972687
GtCCR4-3.0-EYFP	1541	12.9851	0.967304
GtCCR4-3.0-EYFP	1542	13	0.966789
GtCCR4-3.0-EYFP	1543	13.0149	0.968335
GtCCR4-3.0-EYFP	1544	13.0299	0.967762
GtCCR4-3.0-EYFP	1545	13.0448	0.970339
GtCCR4-3.0-EYFP	1546	13.0597	0.984654
GtCCR4-3.0-EYFP	1547	13.0746	1.00155
GtCCR4-3.0-EYFP	1548	13.0896	1.02508
GtCCR4-3.0-EYFP	1549	13.1045	1.02903
GtCCR4-3.0-EYFP	1550	13.1194	1.0414
GtCCR4-3.0-EYFP	1551	13.1343	1.0335
GtCCR4-3.0-EYFP	1552	13.1493	1.02491
GtCCR4-3.0-EYFP	1553	13.1642	1.01254
GtCCR4-3.0-EYFP	1554	13.1791	1.01019
GtCCR4-3.0-EYFP	1555	13.194	1.00281
GtCCR4-3.0-EYFP	1556	13.209	1.00218
GtCCR4-3.0-EYFP	1557	13.2239	0.997939
GtCCR4-3.0-EYFP	1558	13.2388	0.985685
GtCCR4-3.0-EYFP	1559	13.2537	0.98139
GtCCR4-3.0-EYFP	1560	13.2687	0.973775
GtCCR4-3.0-EYFP	1561	13.2836	0.970053
GtCCR4-3.0-EYFP	1562	13.2985	0.971885
GtCCR4-3.0-EYFP	1563	13.3134	0.972744
GtCCR4-3.0-EYFP	1564	13.3284	0.974519
GtCCR4-3.0-EYFP	1565	13.3433	0.979329
GtCCR4-3.0-EYFP	1566	13.3582	0.988777
GtCCR4-3.0-EYFP	1567	13.3731	1.01993
GtCCR4-3.0-EYFP	1568	13.3881	1.02915
GtCCR4-3.0-EYFP	1569	13.403	1.03659
GtCCR4-3.0-EYFP	1570	13.4179	1.04804
GtCCR4-3.0-EYFP	1571	13.4328	1.03207
GtCCR4-3.0-EYFP	1572	13.4478	1.02422
GtCCR4-3.0-EYFP	1573	13.4627	1.01609
GtCCR4-3.0-EYFP	1574	13.4776	1.00607
GtCCR4-3.0-EYFP	1575	13.4925	0.999885
GtCCR4-3.0-EYFP	1576	13.5075	0.99708
GtCCR4-3.0-EYFP	1577	13.5224	0.99038
GtCCR4-3.0-EYFP	1578	13.5373	0.98265
GtCCR4-3.0-EYFP	1579	13.5522	0.975321
GtCCR4-3.0-EYFP	1580	13.5672	0.97011
GtCCR4-3.0-EYFP	1581	13.5821	0.965415
GtCCR4-3.0-EYFP	1582	13.597	0.969938
GtCCR4-3.0-EYFP	1583	13.6119	0.966732
GtCCR4-3.0-EYFP	1584	13.6269	0.978585
GtCCR4-3.0-EYFP	1585	13.6418	0.982077
GtCCR4-3.0-EYFP	1586	13.6567	0.999198
GtCCR4-3.0-EYFP	1587	13.6716	1.01981
GtCCR4-3.0-EYFP	1588	13.6866	1.03327
GtCCR4-3.0-EYFP	1589	13.7015	1.03636
GtCCR4-3.0-EYFP	1590	13.7164	1.03
GtCCR4-3.0-EYFP	1591	13.7313	1.02365
GtCCR4-3.0-EYFP	1592	13.7463	1.0138
GtCCR4-3.0-EYFP	1593	13.7612	1.00699
GtCCR4-3.0-EYFP	1594	13.7761	0.995133
GtCCR4-3.0-EYFP	1595	13.791	0.99771
GtCCR4-3.0-EYFP	1596	13.806	0.993186
GtCCR4-3.0-EYFP	1597	13.8209	0.980875
GtCCR4-3.0-EYFP	1598	13.8358	0.974404
GtCCR4-3.0-EYFP	1599	13.8507	0.971026
GtCCR4-3.0-EYFP	1600	13.8657	0.969766
GtCCR4-3.0-EYFP	1601	13.8806	0.963296
GtCCR4-3.0-EYFP	1602	13.8955	0.96948
GtCCR4-3.0-EYFP	1603	13.9104	0.975149
GtCCR4-3.0-EYFP	1604	13.9254	0.977955
GtCCR4-3.0-EYFP	1605	13.9403	0.983509
GtCCR4-3.0-EYFP	1606	13.9552	1.01288
GtCCR4-3.0-EYFP	1607	13.9701	1.02955
GtCCR4-3.0-EYFP	1608	13.9851	1.03396
GtCCR4-3.0-EYFP	1609	14	1.04352
GtCCR4-3.0-EYFP	1610	14.0149	1.03327
GtCCR4-3.0-EYFP	1611	14.0299	1.02325
GtCCR4-3.0-EYFP	1612	14.0448	1.01449
GtCCR4-3.0-EYFP	1613	14.0597	1.00658
GtCCR4-3.0-EYFP	1614	14.0746	0.999485
GtCCR4-3.0-EYFP	1615	14.0896	0.994847
GtCCR4-3.0-EYFP	1616	14.1045	0.990323
GtCCR4-3.0-EYFP	1617	14.1194	0.978699
GtCCR4-3.0-EYFP	1618	14.1343	0.975951
GtCCR4-3.0-EYFP	1619	14.1493	0.972858
GtCCR4-3.0-EYFP	1620	14.1642	0.969137
GtCCR4-3.0-EYFP	1621	14.1791	0.970454
GtCCR4-3.0-EYFP	1622	14.194	0.971484
GtCCR4-3.0-EYFP	1623	14.209	0.969881
GtCCR4-3.0-EYFP	1624	14.2239	0.981619
GtCCR4-3.0-EYFP	1625	14.2388	0.992613
GtCCR4-3.0-EYFP	1626	14.2537	1.01689
GtCCR4-3.0-EYFP	1627	14.2687	1.02817
GtCCR4-3.0-EYFP	1628	14.2836	1.03144
GtCCR4-3.0-EYFP	1629	14.2985	1.03138
GtCCR4-3.0-EYFP	1630	14.3134	1.02382
GtCCR4-3.0-EYFP	1631	14.3284	1.01832
GtCCR4-3.0-EYFP	1632	14.3433	1.00985
GtCCR4-3.0-EYFP	1633	14.3582	1.0059
GtCCR4-3.0-EYFP	1634	14.3731	0.999599
GtCCR4-3.0-EYFP	1635	14.3881	0.988319
GtCCR4-3.0-EYFP	1636	14.403	0.987746
GtCCR4-3.0-EYFP	1637	14.4179	0.980531
GtCCR4-3.0-EYFP	1638	14.4328	0.976351
GtCCR4-3.0-EYFP	1639	14.4478	0.973087
GtCCR4-3.0-EYFP	1640	14.4627	0.969995
GtCCR4-3.0-EYFP	1641	14.4776	0.969194
GtCCR4-3.0-EYFP	1642	14.4925	0.96948
GtCCR4-3.0-EYFP	1643	14.5075	0.978413
GtCCR4-3.0-EYFP	1644	14.5224	0.98391
GtCCR4-3.0-EYFP	1645	14.5373	1.00813
GtCCR4-3.0-EYFP	1646	14.5522	1.03109
GtCCR4-3.0-EYFP	1647	14.5672	1.03447
GtCCR4-3.0-EYFP	1648	14.5821	1.03676
GtCCR4-3.0-EYFP	1649	14.597	1.03006
GtCCR4-3.0-EYFP	1650	14.6119	1.02222
GtCCR4-3.0-EYFP	1651	14.6269	1.01271
GtCCR4-3.0-EYFP	1652	14.6418	1.01025
GtCCR4-3.0-EYFP	1653	14.6567	1.00452
GtCCR4-3.0-EYFP	1654	14.6716	0.997022
GtCCR4-3.0-EYFP	1655	14.6866	0.995763
GtCCR4-3.0-EYFP	1656	14.7015	0.984311
GtCCR4-3.0-EYFP	1657	14.7164	0.977325
GtCCR4-3.0-EYFP	1658	14.7313	0.96948
GtCCR4-3.0-EYFP	1659	14.7463	0.966846
GtCCR4-3.0-EYFP	1660	14.7612	0.972629
GtCCR4-3.0-EYFP	1661	14.7761	0.971713
GtCCR4-3.0-EYFP	1662	14.791	0.973775
GtCCR4-3.0-EYFP	1663	14.806	0.985857
GtCCR4-3.0-EYFP	1664	14.8209	1.00006
GtCCR4-3.0-EYFP	1665	14.8358	1.01787
GtCCR4-3.0-EYFP	1666	14.8507	1.03063
GtCCR4-3.0-EYFP	1667	14.8657	1.03138
GtCCR4-3.0-EYFP	1668	14.8806	1.02749
GtCCR4-3.0-EYFP	1669	14.8955	1.02663
GtCCR4-3.0-EYFP	1670	14.9104	1.01643
GtCCR4-3.0-EYFP	1671	14.9254	1.00641
GtCCR4-3.0-EYFP	1672	14.9403	1.00017
GtCCR4-3.0-EYFP	1673	14.9552	0.995247
GtCCR4-3.0-EYFP	1674	14.9701	0.995705
GtCCR4-3.0-EYFP	1675	14.9851	0.983967
GtCCR4-3.0-EYFP	1676	15	0.975263
GtCCR4-3.0-EYFP	1677	15.0149	0.971141
GtCCR4-3.0-EYFP	1678	15.0299	0.963181
GtCCR4-3.0-EYFP	1679	15.0448	0.965472
GtCCR4-3.0-EYFP	1680	15.0597	0.968049
GtCCR4-3.0-EYFP	1681	15.0746	0.969251
GtCCR4-3.0-EYFP	1682	15.0896	0.977382
GtCCR4-3.0-EYFP	1683	15.1045	0.984826
GtCCR4-3.0-EYFP	1684	15.1194	1.00882
GtCCR4-3.0-EYFP	1685	15.1343	1.02594
GtCCR4-3.0-EYFP	1686	15.1493	1.03831
GtCCR4-3.0-EYFP	1687	15.1642	1.04352
GtCCR4-3.0-EYFP	1688	15.1791	1.0335
GtCCR4-3.0-EYFP	1689	15.194	1.02978
GtCCR4-3.0-EYFP	1690	15.209	1.0225
GtCCR4-3.0-EYFP	1691	15.2239	1.01248
GtCCR4-3.0-EYFP	1692	15.2388	1.0067
GtCCR4-3.0-EYFP	1693	15.2537	1.00212
GtCCR4-3.0-EYFP	1694	15.2687	0.993873
GtCCR4-3.0-EYFP	1695	15.2836	0.981333
GtCCR4-3.0-EYFP	1696	15.2985	0.971599
GtCCR4-3.0-EYFP	1697	15.3134	0.971427
GtCCR4-3.0-EYFP	1698	15.3284	0.970339
GtCCR4-3.0-EYFP	1699	15.3433	0.969251
GtCCR4-3.0-EYFP	1700	15.3582	0.971713
GtCCR4-3.0-EYFP	1701	15.3731	0.971141
GtCCR4-3.0-EYFP	1702	15.3881	0.97555
GtCCR4-3.0-EYFP	1703	15.403	0.984654
GtCCR4-3.0-EYFP	1704	15.4179	1.00613
GtCCR4-3.0-EYFP	1705	15.4328	1.0221
GtCCR4-3.0-EYFP	1706	15.4478	1.0272
GtCCR4-3.0-EYFP	1707	15.4627	1.03258
GtCCR4-3.0-EYFP	1708	15.4776	1.02302
GtCCR4-3.0-EYFP	1709	15.4925	1.01277
GtCCR4-3.0-EYFP	1710	15.5075	1.00704
GtCCR4-3.0-EYFP	1711	15.5224	1.00006
GtCCR4-3.0-EYFP	1712	15.5373	0.998626
GtCCR4-3.0-EYFP	1713	15.5522	0.994217
GtCCR4-3.0-EYFP	1714	15.5672	0.99227
GtCCR4-3.0-EYFP	1715	15.5821	0.980073
GtCCR4-3.0-EYFP	1716	15.597	0.970053
GtCCR4-3.0-EYFP	1717	15.6119	0.967247
GtCCR4-3.0-EYFP	1718	15.6269	0.964727
GtCCR4-3.0-EYFP	1719	15.6418	0.965701
GtCCR4-3.0-EYFP	1720	15.6567	0.967247
GtCCR4-3.0-EYFP	1721	15.6716	0.971198
GtCCR4-3.0-EYFP	1722	15.6866	0.976294
GtCCR4-3.0-EYFP	1723	15.7015	0.989579
GtCCR4-3.0-EYFP	1724	15.7164	1.01363
GtCCR4-3.0-EYFP	1725	15.7313	1.02262
GtCCR4-3.0-EYFP	1726	15.7463	1.02892
GtCCR4-3.0-EYFP	1727	15.7612	1.02783
GtCCR4-3.0-EYFP	1728	15.7761	1.02726
GtCCR4-3.0-EYFP	1729	15.791	1.01414
GtCCR4-3.0-EYFP	1730	15.806	1.00458
GtCCR4-3.0-EYFP	1731	15.8209	0.998511
GtCCR4-3.0-EYFP	1732	15.8358	0.995076
GtCCR4-3.0-EYFP	1733	15.8507	0.988834
GtCCR4-3.0-EYFP	1734	15.8657	0.984597
GtCCR4-3.0-EYFP	1735	15.8806	0.973374
GtCCR4-3.0-EYFP	1736	15.8955	0.966388
GtCCR4-3.0-EYFP	1737	15.9104	0.97137
GtCCR4-3.0-EYFP	1738	15.9254	0.968106
GtCCR4-3.0-EYFP	1739	15.9403	0.967304
GtCCR4-3.0-EYFP	1740	15.9552	0.972114
GtCCR4-3.0-EYFP	1741	15.9701	0.978241
GtCCR4-3.0-EYFP	1742	15.9851	0.987861
GtCCR4-3.0-EYFP	1743	16	1.01065
GtCCR4-3.0-EYFP	1744	16.0149	1.01701
GtCCR4-3.0-EYFP	1745	16.0299	1.02634
GtCCR4-3.0-EYFP	1746	16.0448	1.02903
GtCCR4-3.0-EYFP	1747	16.0597	1.01935
GtCCR4-3.0-EYFP	1748	16.0746	1.01243
GtCCR4-3.0-EYFP	1749	16.0896	1.00458
GtCCR4-3.0-EYFP	1750	16.1045	1.00006
GtCCR4-3.0-EYFP	1751	16.1194	0.994159
GtCCR4-3.0-EYFP	1752	16.1343	0.990208
GtCCR4-3.0-EYFP	1753	16.1493	0.986086
GtCCR4-3.0-EYFP	1754	16.1642	0.977096
GtCCR4-3.0-EYFP	1755	16.1791	0.972629
GtCCR4-3.0-EYFP	1756	16.194	0.96719
GtCCR4-3.0-EYFP	1757	16.209	0.970396
GtCCR4-3.0-EYFP	1758	16.2239	0.971885
GtCCR4-3.0-EYFP	1759	16.2388	0.969423
GtCCR4-3.0-EYFP	1760	16.2537	0.969366
GtCCR4-3.0-EYFP	1761	16.2687	0.978069
GtCCR4-3.0-EYFP	1762	16.2836	0.990552
GtCCR4-3.0-EYFP	1763	16.2985	1.01495
GtCCR4-3.0-EYFP	1764	16.3134	1.02548
GtCCR4-3.0-EYFP	1765	16.3284	1.02611
GtCCR4-3.0-EYFP	1766	16.3433	1.03155
GtCCR4-3.0-EYFP	1767	16.3582	1.026
GtCCR4-3.0-EYFP	1768	16.3731	1.01895
GtCCR4-3.0-EYFP	1769	16.3881	1.0087
GtCCR4-3.0-EYFP	1770	16.403	0.999885
GtCCR4-3.0-EYFP	1771	16.4179	0.995476
GtCCR4-3.0-EYFP	1772	16.4328	0.990838
GtCCR4-3.0-EYFP	1773	16.4478	0.983165
GtCCR4-3.0-EYFP	1774	16.4627	0.978069
GtCCR4-3.0-EYFP	1775	16.4776	0.970568
GtCCR4-3.0-EYFP	1776	16.4925	0.964899
GtCCR4-3.0-EYFP	1777	16.5075	0.968507
GtCCR4-3.0-EYFP	1778	16.5224	0.969938
GtCCR4-3.0-EYFP	1779	16.5373	0.971026
GtCCR4-3.0-EYFP	1780	16.5522	0.977382
GtCCR4-3.0-EYFP	1781	16.5672	0.988548
GtCCR4-3.0-EYFP	1782	16.5821	1.00658
GtCCR4-3.0-EYFP	1783	16.597	1.02376
GtCCR4-3.0-EYFP	1784	16.6119	1.03424
GtCCR4-3.0-EYFP	1785	16.6269	1.03859
GtCCR4-3.0-EYFP	1786	16.6418	1.02886
GtCCR4-3.0-EYFP	1787	16.6567	1.01792
GtCCR4-3.0-EYFP	1788	16.6716	1.01409
GtCCR4-3.0-EYFP	1789	16.6866	1.00653
GtCCR4-3.0-EYFP	1790	16.7015	1.00212
GtCCR4-3.0-EYFP	1791	16.7164	0.994045
GtCCR4-3.0-EYFP	1792	16.7313	0.990323
GtCCR4-3.0-EYFP	1793	16.7463	0.98139
GtCCR4-3.0-EYFP	1794	16.7612	0.972515
GtCCR4-3.0-EYFP	1795	16.7761	0.973202
GtCCR4-3.0-EYFP	1796	16.791	0.968564
GtCCR4-3.0-EYFP	1797	16.806	0.971942
GtCCR4-3.0-EYFP	1798	16.8209	0.962494
GtCCR4-3.0-EYFP	1799	16.8358	0.965701
GtCCR4-3.0-EYFP	1800	16.8507	0.970912
GtCCR4-3.0-EYFP	1801	16.8657	0.985857
GtCCR4-3.0-EYFP	1802	16.8806	1.01655
GtCCR4-3.0-EYFP	1803	16.8955	1.02794
GtCCR4-3.0-EYFP	1804	16.9104	1.03527
GtCCR4-3.0-EYFP	1805	16.9254	1.03476
GtCCR4-3.0-EYFP	1806	16.9403	1.0323
GtCCR4-3.0-EYFP	1807	16.9552	1.02164
GtCCR4-3.0-EYFP	1808	16.9701	1.01271
GtCCR4-3.0-EYFP	1809	16.9851	1.00407
GtCCR4-3.0-EYFP	1810	17	1.00378
GtCCR4-3.0-EYFP	1811	17.0149	0.99393
GtCCR4-3.0-EYFP	1812	17.0299	0.986945
GtCCR4-3.0-EYFP	1813	17.0448	0.979329
GtCCR4-3.0-EYFP	1814	17.0597	0.97555
GtCCR4-3.0-EYFP	1815	17.0746	0.971141
GtCCR4-3.0-EYFP	1816	17.0896	0.978585
GtCCR4-3.0-EYFP	1817	17.1045	0.975378
GtCCR4-3.0-EYFP	1818	17.1194	0.970568
GtCCR4-3.0-EYFP	1819	17.1343	0.975607
GtCCR4-3.0-EYFP	1820	17.1493	0.986372
GtCCR4-3.0-EYFP	1821	17.1642	1.00069
GtCCR4-3.0-EYFP	1822	17.1791	1.01998
GtCCR4-3.0-EYFP	1823	17.194	1.02829
GtCCR4-3.0-EYFP	1824	17.209	1.0363
GtCCR4-3.0-EYFP	1825	17.2239	1.0284
GtCCR4-3.0-EYFP	1826	17.2388	1.02096
GtCCR4-3.0-EYFP	1827	17.2537	1.01162
GtCCR4-3.0-EYFP	1828	17.2687	1.00389
GtCCR4-3.0-EYFP	1829	17.2836	0.994847
GtCCR4-3.0-EYFP	1830	17.2985	0.991812
GtCCR4-3.0-EYFP	1831	17.3134	0.991468
GtCCR4-3.0-EYFP	1832	17.3284	0.978928
GtCCR4-3.0-EYFP	1833	17.3433	0.972171
GtCCR4-3.0-EYFP	1834	17.3582	0.964269
GtCCR4-3.0-EYFP	1835	17.3731	0.967476
GtCCR4-3.0-EYFP	1836	17.3881	0.969652
GtCCR4-3.0-EYFP	1837	17.403	0.967018
GtCCR4-3.0-EYFP	1838	17.4179	0.963353
GtCCR4-3.0-EYFP	1839	17.4328	0.973832
GtCCR4-3.0-EYFP	1840	17.4478	0.989579
GtCCR4-3.0-EYFP	1841	17.4627	1.0118
GtCCR4-3.0-EYFP	1842	17.4776	1.02302
GtCCR4-3.0-EYFP	1843	17.4925	1.03006
GtCCR4-3.0-EYFP	1844	17.5075	1.03854
GtCCR4-3.0-EYFP	1845	17.5224	1.02708
GtCCR4-3.0-EYFP	1846	17.5373	1.01752
GtCCR4-3.0-EYFP	1847	17.5522	1.01254
GtCCR4-3.0-EYFP	1848	17.5672	1.0004
GtCCR4-3.0-EYFP	1849	17.5821	0.993873
GtCCR4-3.0-EYFP	1850	17.597	0.992499
GtCCR4-3.0-EYFP	1851	17.6119	0.990609
GtCCR4-3.0-EYFP	1852	17.6269	0.97721
GtCCR4-3.0-EYFP	1853	17.6418	0.972572
GtCCR4-3.0-EYFP	1854	17.6567	0.968278
GtCCR4-3.0-EYFP	1855	17.6716	0.96593
GtCCR4-3.0-EYFP	1856	17.6866	0.967018
GtCCR4-3.0-EYFP	1857	17.7015	0.967934
GtCCR4-3.0-EYFP	1858	17.7164	0.972171
GtCCR4-3.0-EYFP	1859	17.7313	0.978413
GtCCR4-3.0-EYFP	1860	17.7463	0.993873
GtCCR4-3.0-EYFP	1861	17.7612	1.01827
GtCCR4-3.0-EYFP	1862	17.7761	1.02869
GtCCR4-3.0-EYFP	1863	17.791	1.03533
GtCCR4-3.0-EYFP	1864	17.806	1.0394
GtCCR4-3.0-EYFP	1865	17.8209	1.02869
GtCCR4-3.0-EYFP	1866	17.8358	1.02193
GtCCR4-3.0-EYFP	1867	17.8507	1.01048
GtCCR4-3.0-EYFP	1868	17.8657	1.00481
GtCCR4-3.0-EYFP	1869	17.8806	0.998912
GtCCR4-3.0-EYFP	1870	17.8955	0.993701
GtCCR4-3.0-EYFP	1871	17.9104	0.987861
GtCCR4-3.0-EYFP	1872	17.9254	0.973546
GtCCR4-3.0-EYFP	1873	17.9403	0.966503
GtCCR4-3.0-EYFP	1874	17.9552	0.962265
GtCCR4-3.0-EYFP	1875	17.9701	0.964498
GtCCR4-3.0-EYFP	1876	17.9851	0.965529
GtCCR4-3.0-EYFP	1877	18	0.967304
GtCCR4-3.0-EYFP	1878	18.0149	0.96759
GtCCR4-3.0-EYFP	1879	18.0299	0.978756
GtCCR4-3.0-EYFP	1880	18.0448	0.997194
GtCCR4-3.0-EYFP	1881	18.0597	1.01661
GtCCR4-3.0-EYFP	1882	18.0746	1.02983
GtCCR4-3.0-EYFP	1883	18.0896	1.03144
GtCCR4-3.0-EYFP	1884	18.1045	1.03161
GtCCR4-3.0-EYFP	1885	18.1194	1.02462
GtCCR4-3.0-EYFP	1886	18.1343	1.01741
GtCCR4-3.0-EYFP	1887	18.1493	1.00607
GtCCR4-3.0-EYFP	1888	18.1642	0.995018
GtCCR4-3.0-EYFP	1889	18.1791	0.998969
GtCCR4-3.0-EYFP	1890	18.194	0.993759
GtCCR4-3.0-EYFP	1891	18.209	0.982306
GtCCR4-3.0-EYFP	1892	18.2239	0.972229
GtCCR4-3.0-EYFP	1893	18.2388	0.967705
GtCCR4-3.0-EYFP	1894	18.2537	0.963582
GtCCR4-3.0-EYFP	1895	18.2687	0.963639
GtCCR4-3.0-EYFP	1896	18.2836	0.962895
GtCCR4-3.0-EYFP	1897	18.2985	0.961864
GtCCR4-3.0-EYFP	1898	18.3134	0.970282
GtCCR4-3.0-EYFP	1899	18.3284	0.98494
GtCCR4-3.0-EYFP	1900	18.3433	1.00074
GtCCR4-3.0-EYFP	1901	18.3582	1.02136
GtCCR4-3.0-EYFP	1902	18.3731	1.02869
GtCCR4-3.0-EYFP	1903	18.3881	1.03905
GtCCR4-3.0-EYFP	1904	18.403	1.0268
GtCCR4-3.0-EYFP	1905	18.4179	1.02708
GtCCR4-3.0-EYFP	1906	18.4328	1.01832
GtCCR4-3.0-EYFP	1907	18.4478	1.01294
GtCCR4-3.0-EYFP	1908	18.4627	1.00332
GtCCR4-3.0-EYFP	1909	18.4776	0.993415
GtCCR4-3.0-EYFP	1910	18.4925	0.986429
GtCCR4-3.0-EYFP	1911	18.5075	0.97784
GtCCR4-3.0-EYFP	1912	18.5224	0.972171
GtCCR4-3.0-EYFP	1913	18.5373	0.966846
GtCCR4-3.0-EYFP	1914	18.5522	0.967533
GtCCR4-3.0-EYFP	1915	18.5672	0.967247
GtCCR4-3.0-EYFP	1916	18.5821	0.967934
GtCCR4-3.0-EYFP	1917	18.597	0.968621
GtCCR4-3.0-EYFP	1918	18.6119	0.974004
GtCCR4-3.0-EYFP	1919	18.6269	0.987689
GtCCR4-3.0-EYFP	1920	18.6418	1.00475
GtCCR4-3.0-EYFP	1921	18.6567	1.01506
GtCCR4-3.0-EYFP	1922	18.6716	1.03012
GtCCR4-3.0-EYFP	1923	18.6866	1.03424
GtCCR4-3.0-EYFP	1924	18.7015	1.02926
GtCCR4-3.0-EYFP	1925	18.7164	1.01821
GtCCR4-3.0-EYFP	1926	18.7313	1.01477
GtCCR4-3.0-EYFP	1927	18.7463	1.0071
GtCCR4-3.0-EYFP	1928	18.7612	0.99811
GtCCR4-3.0-EYFP	1929	18.7761	0.996335
GtCCR4-3.0-EYFP	1930	18.791	0.994045
GtCCR4-3.0-EYFP	1931	18.806	0.987403
GtCCR4-3.0-EYFP	1932	18.8209	0.976294
GtCCR4-3.0-EYFP	1933	18.8358	0.972572
GtCCR4-3.0-EYFP	1934	18.8507	0.969194
GtCCR4-3.0-EYFP	1935	18.8657	0.96782
GtCCR4-3.0-EYFP	1936	18.8806	0.964212
GtCCR4-3.0-EYFP	1937	18.8955	0.965128
GtCCR4-3.0-EYFP	1938	18.9104	0.969137
GtCCR4-3.0-EYFP	1939	18.9254	0.985456
GtCCR4-3.0-EYFP	1940	18.9403	1.00618
GtCCR4-3.0-EYFP	1941	18.9552	1.01306
GtCCR4-3.0-EYFP	1942	18.9701	1.02462
GtCCR4-3.0-EYFP	1943	18.9851	1.02611
GtCCR4-3.0-EYFP	1944	19	1.02296
GtCCR4-3.0-EYFP	1945	19.0149	1.01495
GtCCR4-3.0-EYFP	1946	19.0299	1.00298
GtCCR4-3.0-EYFP	1947	19.0448	0.998855
GtCCR4-3.0-EYFP	1948	19.0597	0.995934
GtCCR4-3.0-EYFP	1949	19.0746	0.998397
GtCCR4-3.0-EYFP	1950	19.0896	0.989979
GtCCR4-3.0-EYFP	1951	19.1045	0.976237
GtCCR4-3.0-EYFP	1952	19.1194	0.970854
GtCCR4-3.0-EYFP	1953	19.1343	0.966617
GtCCR4-3.0-EYFP	1954	19.1493	0.965472
GtCCR4-3.0-EYFP	1955	19.1642	0.968621
GtCCR4-3.0-EYFP	1956	19.1791	0.969366
GtCCR4-3.0-EYFP	1957	19.194	0.970454
GtCCR4-3.0-EYFP	1958	19.209	0.977497
GtCCR4-3.0-EYFP	1959	19.2239	0.989063
GtCCR4-3.0-EYFP	1960	19.2388	1.01008
GtCCR4-3.0-EYFP	1961	19.2537	1.02113
GtCCR4-3.0-EYFP	1962	19.2687	1.0256
GtCCR4-3.0-EYFP	1963	19.2836	1.03035
GtCCR4-3.0-EYFP	1964	19.2985	1.02634
GtCCR4-3.0-EYFP	1965	19.3134	1.0162
GtCCR4-3.0-EYFP	1966	19.3284	1.00721
GtCCR4-3.0-EYFP	1967	19.3433	1.00533
GtCCR4-3.0-EYFP	1968	19.3582	0.999714
GtCCR4-3.0-EYFP	1969	19.3731	0.99582
GtCCR4-3.0-EYFP	1970	19.3881	0.986372
GtCCR4-3.0-EYFP	1971	19.403	0.972515
GtCCR4-3.0-EYFP	1972	19.4179	0.965472
GtCCR4-3.0-EYFP	1973	19.4328	0.9653
GtCCR4-3.0-EYFP	1974	19.4478	0.96301
GtCCR4-3.0-EYFP	1975	19.4627	0.968507
GtCCR4-3.0-EYFP	1976	19.4776	0.966388
GtCCR4-3.0-EYFP	1977	19.4925	0.966846
GtCCR4-3.0-EYFP	1978	19.5075	0.975779
GtCCR4-3.0-EYFP	1979	19.5224	0.995419
GtCCR4-3.0-EYFP	1980	19.5373	1.0162
GtCCR4-3.0-EYFP	1981	19.5522	1.02651
GtCCR4-3.0-EYFP	1982	19.5672	1.03338
GtCCR4-3.0-EYFP	1983	19.5821	1.03247
GtCCR4-3.0-EYFP	1984	19.597	1.02456
GtCCR4-3.0-EYFP	1985	19.6119	1.01781
GtCCR4-3.0-EYFP	1986	19.6269	1.00498
GtCCR4-3.0-EYFP	1987	19.6418	0.998626
GtCCR4-3.0-EYFP	1988	19.6567	0.995648
GtCCR4-3.0-EYFP	1989	19.6716	0.986257
GtCCR4-3.0-EYFP	1990	19.6866	0.979615
GtCCR4-3.0-EYFP	1991	19.7015	0.968678
GtCCR4-3.0-EYFP	1992	19.7164	0.962781
GtCCR4-3.0-EYFP	1993	19.7313	0.967762
GtCCR4-3.0-EYFP	1994	19.7463	0.967648
GtCCR4-3.0-EYFP	1995	19.7612	0.96759
GtCCR4-3.0-EYFP	1996	19.7761	0.970396
GtCCR4-3.0-EYFP	1997	19.791	0.973603
GtCCR4-3.0-EYFP	1998	19.806	0.98809
GtCCR4-3.0-EYFP	1999	19.8209	0.997366
[truncated: 4,968 more rows]

## Sheet: C
Line	Time (ms)	X	Y
GtCCR4-3.0-EYFP	500	-9.5	1.14286
GtCCR4-3.0-EYFP	600	-9.4	0.857143
GtCCR4-3.0-EYFP	700	-9.3	1.14286
GtCCR4-3.0-EYFP	800	-9.2	1.14286
GtCCR4-3.0-EYFP	900	-9.1	0.857143
GtCCR4-3.0-EYFP	1000	-9	1.14286
GtCCR4-3.0-EYFP	1100	-8.9	0.857143
GtCCR4-3.0-EYFP	1200	-8.8	0.857143
GtCCR4-3.0-EYFP	1300	-8.7	1.14286
GtCCR4-3.0-EYFP	1400	-8.6	0.857143
GtCCR4-3.0-EYFP	1500	-8.5	0.857143
GtCCR4-3.0-EYFP	1600	-8.4	1.14286
GtCCR4-3.0-EYFP	1700	-8.3	0.857143
GtCCR4-3.0-EYFP	1800	-8.2	0.857143
GtCCR4-3.0-EYFP	1900	-8.1	1.14286
GtCCR4-3.0-EYFP	2000	-8	0.857143
GtCCR4-3.0-EYFP	2100	-7.9	0.857143
GtCCR4-3.0-EYFP	2200	-7.8	1.14286
GtCCR4-3.0-EYFP	2300	-7.7	0.857143
GtCCR4-3.0-EYFP	2400	-7.6	0.857143
GtCCR4-3.0-EYFP	2500	-7.5	1.14286
GtCCR4-3.0-EYFP	2600	-7.4	0.857143
GtCCR4-3.0-EYFP	2700	-7.3	0.857143
GtCCR4-3.0-EYFP	2800	-7.2	1.14286
GtCCR4-3.0-EYFP	2900	-7.1	0.857143
GtCCR4-3.0-EYFP	3000	-7	0.857143
GtCCR4-3.0-EYFP	3100	-6.9	1.14286
GtCCR4-3.0-EYFP	3200	-6.8	0.857143
GtCCR4-3.0-EYFP	3300	-6.7	1.14286
GtCCR4-3.0-EYFP	3400	-6.6	1.14286
GtCCR4-3.0-EYFP	3500	-6.5	0.857143
GtCCR4-3.0-EYFP	3600	-6.4	1.14286
GtCCR4-3.0-EYFP	3700	-6.3	1.14286
GtCCR4-3.0-EYFP	3800	-6.2	0.857143
GtCCR4-3.0-EYFP	3900	-6.1	1.14286
GtCCR4-3.0-EYFP	4000	-6	1.14286
GtCCR4-3.0-EYFP	4100	-5.9	0.857143
GtCCR4-3.0-EYFP	4200	-5.8	1.14286
GtCCR4-3.0-EYFP	4300	-5.7	0.857143
GtCCR4-3.0-EYFP	4400	-5.6	0.857143
GtCCR4-3.0-EYFP	4500	-5.5	1.14286
GtCCR4-3.0-EYFP	4600	-5.4	0.857143
GtCCR4-3.0-EYFP	4700	-5.3	0.857143
GtCCR4-3.0-EYFP	4800	-5.2	1.14286
GtCCR4-3.0-EYFP	4900	-5.1	0.857143
GtCCR4-3.0-EYFP	5000	-5	0.857143
GtCCR4-3.0-EYFP	5100	-4.9	1.14286
GtCCR4-3.0-EYFP	5200	-4.8	0.857143
GtCCR4-3.0-EYFP	5300	-4.7	0.857143
GtCCR4-3.0-EYFP	5400	-4.6	1.14286
GtCCR4-3.0-EYFP	5500	-4.5	0.857143
GtCCR4-3.0-EYFP	5600	-4.4	0.857143
GtCCR4-3.0-EYFP	5700	-4.3	1.14286
GtCCR4-3.0-EYFP	5800	-4.2	0.857143
GtCCR4-3.0-EYFP	5900	-4.1	0.857143
GtCCR4-3.0-EYFP	6000	-4	1.14286
GtCCR4-3.0-EYFP	6100	-3.9	0.857143
GtCCR4-3.0-EYFP	6200	-3.8	0.857143
GtCCR4-3.0-EYFP	6300	-3.7	1.14286
GtCCR4-3.0-EYFP	6400	-3.6	0.857143
GtCCR4-3.0-EYFP	6500	-3.5	1.14286
GtCCR4-3.0-EYFP	6600	-3.4	1.14286
GtCCR4-3.0-EYFP	6700	-3.3	0.857143
GtCCR4-3.0-EYFP	6800	-3.2	1.14286
GtCCR4-3.0-EYFP	6900	-3.1	1.14286
GtCCR4-3.0-EYFP	7000	-3	0.857143
GtCCR4-3.0-EYFP	7100	-2.9	1.14286
GtCCR4-3.0-EYFP	7200	-2.8	1.14286
GtCCR4-3.0-EYFP	7300	-2.7	0.857143
GtCCR4-3.0-EYFP	7400	-2.6	1.14286
GtCCR4-3.0-EYFP	7500	-2.5	0.857143
GtCCR4-3.0-EYFP	7600	-2.4	0.857143
GtCCR4-3.0-EYFP	7700	-2.3	1.14286
GtCCR4-3.0-EYFP	7800	-2.2	0.857143
GtCCR4-3.0-EYFP	7900	-2.1	0.857143
GtCCR4-3.0-EYFP	8000	-2	1.14286
GtCCR4-3.0-EYFP	8100	-1.9	0.857143
GtCCR4-3.0-EYFP	8200	-1.8	0.857143
GtCCR4-3.0-EYFP	8300	-1.7	1.14286
GtCCR4-3.0-EYFP	8400	-1.6	0.857143
GtCCR4-3.0-EYFP	8500	-1.5	0.857143
GtCCR4-3.0-EYFP	8600	-1.4	1.14286
GtCCR4-3.0-EYFP	8700	-1.3	0.857143
GtCCR4-3.0-EYFP	8800	-1.2	0.857143
GtCCR4-3.0-EYFP	8900	-1.1	1.14286
GtCCR4-3.0-EYFP	9000	-1	0.857143
GtCCR4-3.0-EYFP	9100	-0.9	0.857143
GtCCR4-3.0-EYFP	9200	-0.8	1.14286
GtCCR4-3.0-EYFP	9300	-0.7	0.857143
GtCCR4-3.0-EYFP	9400	-0.6	0.857143
GtCCR4-3.0-EYFP	9500	-0.5	1.14286
GtCCR4-3.0-EYFP	9600	-0.4	0.857143
GtCCR4-3.0-EYFP	9700	-0.3	0.857143
GtCCR4-3.0-EYFP	9800	-0.2	0.857143
GtCCR4-3.0-EYFP	9900	-0.1	0.571429
GtCCR4-3.0-EYFP	10000	0	0.571429
GtCCR4-3.0-EYFP	10100	0.1	0.857143
GtCCR4-3.0-EYFP	10200	0.2	0.571429
GtCCR4-3.0-EYFP	10300	0.3	0.571429
GtCCR4-3.0-EYFP	10400	0.4	0.857143
GtCCR4-3.0-EYFP	10500	0.5	0.571429
GtCCR4-3.0-EYFP	10600	0.6	0.571429
GtCCR4-3.0-EYFP	10700	0.7	0.857143
GtCCR4-3.0-EYFP	10800	0.8	0.857143
GtCCR4-3.0-EYFP	10900	0.9	0.857143
GtCCR4-3.0-EYFP	11000	1	1.14286
GtCCR4-3.0-EYFP	11100	1.1	0.857143
GtCCR4-3.0-EYFP	11200	1.2	0.857143
GtCCR4-3.0-EYFP	11300	1.3	1.14286
GtCCR4-3.0-EYFP	11400	1.4	0.857143
GtCCR4-3.0-EYFP	11500	1.5	0.857143
GtCCR4-3.0-EYFP	11600	1.6	1.14286
GtCCR4-3.0-EYFP	11700	1.7	0.857143
GtCCR4-3.0-EYFP	11800	1.8	0.857143
GtCCR4-3.0-EYFP	11900	1.9	1.14286
GtCCR4-3.0-EYFP	12000	2	0.857143
GtCCR4-3.0-EYFP	12100	2.1	0.857143
GtCCR4-3.0-EYFP	12200	2.2	1.14286
GtCCR4-3.0-EYFP	12300	2.3	0.857143
GtCCR4-3.0-EYFP	12400	2.4	0.857143
GtCCR4-3.0-EYFP	12500	2.5	1.14286
GtCCR4-3.0-EYFP	12600	2.6	0.857143
GtCCR4-3.0-EYFP	12700	2.7	0.857143
GtCCR4-3.0-EYFP	12800	2.8	1.14286
GtCCR4-3.0-EYFP	12900	2.9	0.857143
GtCCR4-3.0-EYFP	13000	3	0.857143
GtCCR4-3.0-EYFP	13100	3.1	1.14286
GtCCR4-3.0-EYFP	13200	3.2	0.857143
GtCCR4-3.0-EYFP	13300	3.3	0.857143
GtCCR4-3.0-EYFP	13400	3.4	1.14286
GtCCR4-3.0-EYFP	13500	3.5	0.857143
GtCCR4-3.0-EYFP	13600	3.6	0.857143
GtCCR4-3.0-EYFP	13700	3.7	1.14286
GtCCR4-3.0-EYFP	13800	3.8	0.857143
GtCCR4-3.0-EYFP	13900	3.9	0.857143
GtCCR4-3.0-EYFP	14000	4	1.14286
GtCCR4-3.0-EYFP	14100	4.1	0.857143
GtCCR4-3.0-EYFP	14200	4.2	0.857143
GtCCR4-3.0-EYFP	14300	4.3	1.14286
GtCCR4-3.0-EYFP	14400	4.4	0.857143
GtCCR4-3.0-EYFP	14500	4.5	0.857143
GtCCR4-3.0-EYFP	14600	4.6	1.14286
GtCCR4-3.0-EYFP	14700	4.7	0.857143
GtCCR4-3.0-EYFP	14800	4.8	0.857143
GtCCR4-3.0-EYFP	14900	4.9	1.14286
GtCCR4-3.0-EYFP	15000	5	0.857143
GtCCR4-3.0-EYFP	15100	5.1	0.857143
GtCCR4-3.0-EYFP	15200	5.2	1.14286
GtCCR4-3.0-EYFP	15300	5.3	0.857143
GtCCR4-3.0-EYFP	15400	5.4	0.857143
GtCCR4-3.0-EYFP	15500	5.5	1.14286
GtCCR4-3.0-EYFP	15600	5.6	0.857143
GtCCR4-3.0-EYFP	15700	5.7	1.14286
GtCCR4-3.0-EYFP	15800	5.8	1.14286
GtCCR4-3.0-EYFP	15900	5.9	0.857143
GtCCR4-3.0-EYFP	16000	6	1.14286
GtCCR4-3.0-EYFP	16100	6.1	1.14286
GtCCR4-3.0-EYFP	16200	6.2	0.857143
GtCCR4-3.0-EYFP	16300	6.3	1.14286
GtCCR4-3.0-EYFP	16400	6.4	1.14286
GtCCR4-3.0-EYFP	16500	6.5	0.857143
GtCCR4-3.0-EYFP	16600	6.6	1.14286
GtCCR4-3.0-EYFP	16700	6.7	0.857143
GtCCR4-3.0-EYFP	16800	6.8	0.857143
GtCCR4-3.0-EYFP	16900	6.9	1.14286
GtCCR4-3.0-EYFP	17000	7	0.857143
GtCCR4-3.0-EYFP	17100	7.1	0.857143
GtCCR4-3.0-EYFP	17200	7.2	1.14286
GtCCR4-3.0-EYFP	17300	7.3	0.857143
GtCCR4-3.0-EYFP	17400	7.4	0.857143
GtCCR4-3.0-EYFP	17500	7.5	1.14286
GtCCR4-3.0-EYFP	17600	7.6	0.857143
GtCCR4-3.0-EYFP	17700	7.7	0.857143
GtCCR4-3.0-EYFP	17800	7.8	1.14286
GtCCR4-3.0-EYFP	17900	7.9	0.857143
GtCCR4-3.0-EYFP	18000	8	0.857143
GtCCR4-3.0-EYFP	18100	8.1	1.14286
GtCCR4-3.0-EYFP	18200	8.2	0.857143
GtCCR4-3.0-EYFP	18300	8.3	0.857143
GtCCR4-3.0-EYFP	18400	8.4	1.14286
GtCCR4-3.0-EYFP	18500	8.5	0.857143
GtCCR4-3.0-EYFP	18600	8.6	0.857143
GtCCR4-3.0-EYFP	18700	8.7	1.14286
GtCCR4-3.0-EYFP	18800	8.8	0.857143
GtCCR4-3.0-EYFP	18900	8.9	0.857143
GtCCR4-3.0-EYFP	19000	9	1.14286
GtCCR4-3.0-EYFP	19100	9.1	0.857143
GtCCR4-3.0-EYFP	19200	9.2	0.857143
GtCCR4-3.0-EYFP	19300	9.3	1.14286
GtCCR4-3.0-EYFP	19400	9.4	0.857143
GtCCR4-3.0-EYFP	19500	9.5	0.857143
GtCCR4-3.0-EYFP	19600	9.6	1.14286
GtCCR4-3.0-EYFP	19700	9.7	0.857143
GtCCR4-3.0-EYFP	19800	9.8	0.857143
GtCCR4-3.0-EYFP	19900	9.9	1.14286
GtCCR4-3.0-EYFP	20000	10	0.857143
GtCCR4-3.0-EYFP	20100	10.1	0.857143
GtCCR4-3.0-EYFP	20200	10.2	1.14286
GtCCR4-3.0-EYFP	20300	10.3	0.857143
GtCCR4-3.0-EYFP	20400	10.4	0.857143
GtCCR4-3.0-EYFP	20500	10.5	1.14286
GtCCR4-3.0-EYFP	20600	10.6	0.857143
GtCCR4-3.0-EYFP	20700	10.7	0.857143
GtCCR4-3.0-EYFP	20800	10.8	1.14286
GtCCR4-3.0-EYFP	20900	10.9	0.857143
GtCCR4-3.0-EYFP	21000	11	1.14286
GtCCR4-3.0-EYFP	21100	11.1	1.14286
GtCCR4-3.0-EYFP	21200	11.2	0.857143
GtCCR4-3.0-EYFP	21300	11.3	1.14286
GtCCR4-3.0-EYFP	21400	11.4	1.14286
GtCCR4-3.0-EYFP	21500	11.5	0.857143
GtCCR4-3.0-EYFP	21600	11.6	1.14286
GtCCR4-3.0-EYFP	21700	11.7	1.14286
GtCCR4-3.0-EYFP	21800	11.8	0.857143
GtCCR4-3.0-EYFP	21900	11.9	1.14286
GtCCR4-3.0-EYFP	22000	12	0.857143
GtCCR4-3.0-EYFP	22100	12.1	0.857143
GtCCR4-3.0-EYFP	22200	12.2	1.14286
GtCCR4-3.0-EYFP	22300	12.3	0.857143
GtCCR4-3.0-EYFP	22400	12.4	0.857143
GtCCR4-3.0-EYFP	22500	12.5	1.14286
GtCCR4-3.0-EYFP	22600	12.6	0.857143
GtCCR4-3.0-EYFP	22700	12.7	0.857143
GtCCR4-3.0-EYFP	22800	12.8	1.14286
GtCCR4-3.0-EYFP	22900	12.9	0.857143
GtCCR4-3.0-EYFP	23000	13	0.857143
GtCCR4-3.0-EYFP	23100	13.1	1.14286
GtCCR4-3.0-EYFP	23200	13.2	0.857143
GtCCR4-3.0-EYFP	23300	13.3	0.857143
GtCCR4-3.0-EYFP	23400	13.4	1.14286
GtCCR4-3.0-EYFP	23500	13.5	0.857143
GtCCR4-3.0-EYFP	23600	13.6	0.857143
GtCCR4-3.0-EYFP	23700	13.7	1.14286
GtCCR4-3.0-EYFP	23800	13.8	0.857143
GtCCR4-3.0-EYFP	23900	13.9	0.857143
GtCCR4-3.0-EYFP	24000	14	1.14286
GtCCR4-3.0-EYFP	24100	14.1	0.857143
GtCCR4-3.0-EYFP	24200	14.2	0.857143
GtCCR4-3.0-EYFP	24300	14.3	1.14286
GtCCR4-3.0-EYFP	24400	14.4	0.857143
GtCCR4-3.0-EYFP	24500	14.5	0.857143
GtCCR4-3.0-EYFP	24600	14.6	1.14286
GtCCR4-3.0-EYFP	24700	14.7	0.857143
GtCCR4-3.0-EYFP	24800	14.8	0.857143
GtCCR4-3.0-EYFP	24900	14.9	1.14286
GtCCR4-3.0-EYFP	25000	15	0.857143
GtCCR4-3.0-EYFP	25100	15.1	0.857143
GtCCR4-3.0-EYFP	25200	15.2	1.14286
GtCCR4-3.0-EYFP	25300	15.3	0.857143
GtCCR4-3.0-EYFP	25400	15.4	0.857143
GtCCR4-3.0-EYFP	25500	15.5	1.14286
GtCCR4-3.0-EYFP	25600	15.6	0.857143
GtCCR4-3.0-EYFP	25700	15.7	1.14286
GtCCR4-3.0-EYFP	25800	15.8	1.14286
GtCCR4-3.0-EYFP	25900	15.9	0.857143
GtCCR4-3.0-EYFP	26000	16	1.14286
GtCCR4-3.0-EYFP	26100	16.1	1.14286
GtCCR4-3.0-EYFP	26200	16.2	0.857143
GtCCR4-3.0-EYFP	26300	16.3	1.14286
GtCCR4-3.0-EYFP	26400	16.4	1.14286
GtCCR4-3.0-EYFP	26500	16.5	0.857143
GtCCR4-3.0-EYFP	26600	16.6	1.14286
GtCCR4-3.0-EYFP	26700	16.7	0.857143
GtCCR4-3.0-EYFP	26800	16.8	0.857143
GtCCR4-3.0-EYFP	26900	16.9	1.14286
GtCCR4-3.0-EYFP	27000	17	0.857143
GtCCR4-3.0-EYFP	27100	17.1	0.857143
GtCCR4-3.0-EYFP	27200	17.2	1.14286
GtCCR4-3.0-EYFP	27300	17.3	0.857143
GtCCR4-3.0-EYFP	27400	17.4	0.857143
GtCCR4-3.0-EYFP	27500	17.5	1.14286
GtCCR4-3.0-EYFP	27600	17.6	0.857143
GtCCR4-3.0-EYFP	27700	17.7	0.857143
GtCCR4-3.0-EYFP	27800	17.8	1.14286
GtCCR4-3.0-EYFP	27900	17.9	0.857143
GtCCR4-3.0-EYFP	28000	18	0.857143
GtCCR4-3.0-EYFP	28100	18.1	1.14286
GtCCR4-3.0-EYFP	28200	18.2	0.857143
GtCCR4-3.0-EYFP	28300	18.3	0.857143
GtCCR4-3.0-EYFP	28400	18.4	1.14286
GtCCR4-3.0-EYFP	28500	18.5	0.857143
GtCCR4-3.0-EYFP	28600	18.6	0.857143
GtCCR4-3.0-EYFP	28700	18.7	1.14286
GtCCR4-3.0-EYFP	28800	18.8	0.857143
GtCCR4-3.0-EYFP	28900	18.9	0.857143
GtCCR4-3.0-EYFP	29000	19	1.14286
GtCCR4-3.0-EYFP	29100	19.1	0.857143
GtCCR4-3.0-EYFP	29200	19.2	0.857143
GtCCR4-3.0-EYFP	29300	19.3	1.14286
GtCCR4-3.0-EYFP	29400	19.4	0.857143
GtCCR4-3.0-EYFP	29500	19.5	0.857143
GtCCR4-3.0-EYFP	29600	19.6	1.14286
GtCCR4-3.0-EYFP	29700	19.7	0.857143
GtCCR4-3.0-EYFP	29800	19.8	0.857143
GtCCR4-3.0-EYFP	29900	19.9	1.14286
GtCCR4-3.0-EYFP	500	-9.5	0.882353
GtCCR4-3.0-EYFP	600	-9.4	0.882353
GtCCR4-3.0-EYFP	700	-9.3	0.882353
GtCCR4-3.0-EYFP	800	-9.2	0.882353
GtCCR4-3.0-EYFP	900	-9.1	1.17647
GtCCR4-3.0-EYFP	1000	-9	0.882353
GtCCR4-3.0-EYFP	1100	-8.9	0.882353
GtCCR4-3.0-EYFP	1200	-8.8	1.17647
GtCCR4-3.0-EYFP	1300	-8.7	0.882353
GtCCR4-3.0-EYFP	1400	-8.6	0.882353
GtCCR4-3.0-EYFP	1500	-8.5	1.17647
GtCCR4-3.0-EYFP	1600	-8.4	0.882353
GtCCR4-3.0-EYFP	1700	-8.3	0.882353
GtCCR4-3.0-EYFP	1800	-8.2	1.17647
GtCCR4-3.0-EYFP	1900	-8.1	0.882353
GtCCR4-3.0-EYFP	2000	-8	0.882353
GtCCR4-3.0-EYFP	2100	-7.9	1.17647
GtCCR4-3.0-EYFP	2200	-7.8	0.882353
GtCCR4-3.0-EYFP	2300	-7.7	1.17647
GtCCR4-3.0-EYFP	2400	-7.6	1.17647
GtCCR4-3.0-EYFP	2500	-7.5	0.882353
GtCCR4-3.0-EYFP	2600	-7.4	1.17647
GtCCR4-3.0-EYFP	2700	-7.3	1.17647
GtCCR4-3.0-EYFP	2800	-7.2	0.882353
GtCCR4-3.0-EYFP	2900	-7.1	1.17647
GtCCR4-3.0-EYFP	3000	-7	1.17647
GtCCR4-3.0-EYFP	3100	-6.9	0.882353
GtCCR4-3.0-EYFP	3200	-6.8	1.17647
GtCCR4-3.0-EYFP	3300	-6.7	0.882353
GtCCR4-3.0-EYFP	3400	-6.6	0.882353
GtCCR4-3.0-EYFP	3500	-6.5	1.17647
GtCCR4-3.0-EYFP	3600	-6.4	0.882353
GtCCR4-3.0-EYFP	3700	-6.3	0.882353
GtCCR4-3.0-EYFP	3800	-6.2	1.17647
GtCCR4-3.0-EYFP	3900	-6.1	0.882353
GtCCR4-3.0-EYFP	4000	-6	0.882353
GtCCR4-3.0-EYFP	4100	-5.9	1.17647
GtCCR4-3.0-EYFP	4200	-5.8	0.882353
GtCCR4-3.0-EYFP	4300	-5.7	0.882353
GtCCR4-3.0-EYFP	4400	-5.6	1.17647
GtCCR4-3.0-EYFP	4500	-5.5	0.882353
GtCCR4-3.0-EYFP	4600	-5.4	0.882353
GtCCR4-3.0-EYFP	4700	-5.3	1.17647
GtCCR4-3.0-EYFP	4800	-5.2	0.882353
GtCCR4-3.0-EYFP	4900	-5.1	0.882353
GtCCR4-3.0-EYFP	5000	-5	1.17647
GtCCR4-3.0-EYFP	5100	-4.9	0.882353
GtCCR4-3.0-EYFP	5200	-4.8	1.17647
GtCCR4-3.0-EYFP	5300	-4.7	1.17647
GtCCR4-3.0-EYFP	5400	-4.6	0.882353
GtCCR4-3.0-EYFP	5500	-4.5	1.17647
GtCCR4-3.0-EYFP	5600	-4.4	1.17647
GtCCR4-3.0-EYFP	5700	-4.3	0.882353
GtCCR4-3.0-EYFP	5800	-4.2	1.17647
GtCCR4-3.0-EYFP	5900	-4.1	1.17647
GtCCR4-3.0-EYFP	6000	-4	0.882353
GtCCR4-3.0-EYFP	6100	-3.9	1.17647
GtCCR4-3.0-EYFP	6200	-3.8	0.882353
GtCCR4-3.0-EYFP	6300	-3.7	0.882353
GtCCR4-3.0-EYFP	6400	-3.6	1.17647
GtCCR4-3.0-EYFP	6500	-3.5	0.882353
GtCCR4-3.0-EYFP	6600	-3.4	0.882353
GtCCR4-3.0-EYFP	6700	-3.3	1.17647
GtCCR4-3.0-EYFP	6800	-3.2	0.882353
GtCCR4-3.0-EYFP	6900	-3.1	0.882353
GtCCR4-3.0-EYFP	7000	-3	1.17647
GtCCR4-3.0-EYFP	7100	-2.9	0.882353
GtCCR4-3.0-EYFP	7200	-2.8	0.882353
GtCCR4-3.0-EYFP	7300	-2.7	1.17647
GtCCR4-3.0-EYFP	7400	-2.6	0.882353
GtCCR4-3.0-EYFP	7500	-2.5	0.882353
GtCCR4-3.0-EYFP	7600	-2.4	1.17647
GtCCR4-3.0-EYFP	7700	-2.3	0.882353
GtCCR4-3.0-EYFP	7800	-2.2	0.882353
GtCCR4-3.0-EYFP	7900	-2.1	1.17647
GtCCR4-3.0-EYFP	8000	-2	0.882353
GtCCR4-3.0-EYFP	8100	-1.9	1.17647
GtCCR4-3.0-EYFP	8200	-1.8	1.17647
GtCCR4-3.0-EYFP	8300	-1.7	0.882353
GtCCR4-3.0-EYFP	8400	-1.6	1.17647
GtCCR4-3.0-EYFP	8500	-1.5	1.17647
GtCCR4-3.0-EYFP	8600	-1.4	0.882353
GtCCR4-3.0-EYFP	8700	-1.3	1.17647
GtCCR4-3.0-EYFP	8800	-1.2	1.17647
GtCCR4-3.0-EYFP	8900	-1.1	0.882353
GtCCR4-3.0-EYFP	9000	-1	1.17647
GtCCR4-3.0-EYFP	9100	-0.9	0.882353
GtCCR4-3.0-EYFP	9200	-0.8	0.882353
GtCCR4-3.0-EYFP	9300	-0.7	1.17647
GtCCR4-3.0-EYFP	9400	-0.6	0.882353
GtCCR4-3.0-EYFP	9500	-0.5	0.882353
GtCCR4-3.0-EYFP	9600	-0.4	1.17647
GtCCR4-3.0-EYFP	9700	-0.3	0.882353
GtCCR4-3.0-EYFP	9800	-0.2	0.882353
GtCCR4-3.0-EYFP	9900	-0.1	0.882353
GtCCR4-3.0-EYFP	10000	0	0.588235
GtCCR4-3.0-EYFP	10100	0.1	0.882353
GtCCR4-3.0-EYFP	10200	0.2	0.882353
GtCCR4-3.0-EYFP	10300	0.3	0.588235
GtCCR4-3.0-EYFP	10400	0.4	0.882353
GtCCR4-3.0-EYFP	10500	0.5	0.882353
GtCCR4-3.0-EYFP	10600	0.6	0.588235
GtCCR4-3.0-EYFP	10700	0.7	0.882353
GtCCR4-3.0-EYFP	10800	0.8	0.882353
GtCCR4-3.0-EYFP	10900	0.9	0.882353
GtCCR4-3.0-EYFP	11000	1	1.17647
GtCCR4-3.0-EYFP	11100	1.1	0.882353
GtCCR4-3.0-EYFP	11200	1.2	0.882353
GtCCR4-3.0-EYFP	11300	1.3	1.17647
GtCCR4-3.0-EYFP	11400	1.4	0.882353
GtCCR4-3.0-EYFP	11500	1.5	0.882353
GtCCR4-3.0-EYFP	11600	1.6	1.17647
GtCCR4-3.0-EYFP	11700	1.7	0.882353
GtCCR4-3.0-EYFP	11800	1.8	0.882353
GtCCR4-3.0-EYFP	11900	1.9	1.17647
GtCCR4-3.0-EYFP	12000	2	0.882353
GtCCR4-3.0-EYFP	12100	2.1	0.882353
GtCCR4-3.0-EYFP	12200	2.2	1.17647
GtCCR4-3.0-EYFP	12300	2.3	0.882353
GtCCR4-3.0-EYFP	12400	2.4	0.882353
GtCCR4-3.0-EYFP	12500	2.5	1.17647
GtCCR4-3.0-EYFP	12600	2.6	0.882353
GtCCR4-3.0-EYFP	12700	2.7	0.882353
GtCCR4-3.0-EYFP	12800	2.8	1.17647
GtCCR4-3.0-EYFP	12900	2.9	0.882353
GtCCR4-3.0-EYFP	13000	3	0.882353
GtCCR4-3.0-EYFP	13100	3.1	1.17647
GtCCR4-3.0-EYFP	13200	3.2	0.882353
GtCCR4-3.0-EYFP	13300	3.3	0.882353
GtCCR4-3.0-EYFP	13400	3.4	1.17647
GtCCR4-3.0-EYFP	13500	3.5	0.882353
GtCCR4-3.0-EYFP	13600	3.6	0.882353
GtCCR4-3.0-EYFP	13700	3.7	1.17647
GtCCR4-3.0-EYFP	13800	3.8	0.882353
GtCCR4-3.0-EYFP	13900	3.9	1.17647
GtCCR4-3.0-EYFP	14000	4	1.17647
GtCCR4-3.0-EYFP	14100	4.1	0.882353
GtCCR4-3.0-EYFP	14200	4.2	1.17647
GtCCR4-3.0-EYFP	14300	4.3	1.17647
GtCCR4-3.0-EYFP	14400	4.4	0.882353
GtCCR4-3.0-EYFP	14500	4.5	1.17647
GtCCR4-3.0-EYFP	14600	4.6	1.17647
GtCCR4-3.0-EYFP	14700	4.7	0.882353
GtCCR4-3.0-EYFP	14800	4.8	1.17647
GtCCR4-3.0-EYFP	14900	4.9	0.882353
GtCCR4-3.0-EYFP	15000	5	0.882353
GtCCR4-3.0-EYFP	15100	5.1	1.17647
GtCCR4-3.0-EYFP	15200	5.2	0.882353
GtCCR4-3.0-EYFP	15300	5.3	0.882353
GtCCR4-3.0-EYFP	15400	5.4	1.17647
GtCCR4-3.0-EYFP	15500	5.5	0.882353
GtCCR4-3.0-EYFP	15600	5.6	0.882353
GtCCR4-3.0-EYFP	15700	5.7	1.17647
GtCCR4-3.0-EYFP	15800	5.8	0.882353
GtCCR4-3.0-EYFP	15900	5.9	0.882353
GtCCR4-3.0-EYFP	16000	6	1.17647
GtCCR4-3.0-EYFP	16100	6.1	0.882353
GtCCR4-3.0-EYFP	16200	6.2	0.882353
GtCCR4-3.0-EYFP	16300	6.3	1.17647
GtCCR4-3.0-EYFP	16400	6.4	0.882353
GtCCR4-3.0-EYFP	16500	6.5	0.882353
GtCCR4-3.0-EYFP	16600	6.6	1.17647
GtCCR4-3.0-EYFP	16700	6.7	0.882353
GtCCR4-3.0-EYFP	16800	6.8	0.882353
GtCCR4-3.0-EYFP	16900	6.9	1.17647
GtCCR4-3.0-EYFP	17000	7	0.882353
GtCCR4-3.0-EYFP	17100	7.1	0.882353
GtCCR4-3.0-EYFP	17200	7.2	1.17647
GtCCR4-3.0-EYFP	17300	7.3	0.882353
GtCCR4-3.0-EYFP	17400	7.4	0.882353
GtCCR4-3.0-EYFP	17500	7.5	1.17647
GtCCR4-3.0-EYFP	17600	7.6	0.882353
GtCCR4-3.0-EYFP	17700	7.7	1.17647
GtCCR4-3.0-EYFP	17800	7.8	1.17647
GtCCR4-3.0-EYFP	17900	7.9	0.882353
GtCCR4-3.0-EYFP	18000	8	1.17647
GtCCR4-3.0-EYFP	18100	8.1	1.17647
GtCCR4-3.0-EYFP	18200	8.2	0.882353
GtCCR4-3.0-EYFP	18300	8.3	1.17647
GtCCR4-3.0-EYFP	18400	8.4	1.17647
GtCCR4-3.0-EYFP	18500	8.5	0.882353
GtCCR4-3.0-EYFP	18600	8.6	1.17647
GtCCR4-3.0-EYFP	18700	8.7	0.882353
GtCCR4-3.0-EYFP	18800	8.8	0.882353
GtCCR4-3.0-EYFP	18900	8.9	1.17647
GtCCR4-3.0-EYFP	19000	9	0.882353
GtCCR4-3.0-EYFP	19100	9.1	0.882353
GtCCR4-3.0-EYFP	19200	9.2	1.17647
GtCCR4-3.0-EYFP	19300	9.3	0.882353
GtCCR4-3.0-EYFP	19400	9.4	0.882353
GtCCR4-3.0-EYFP	19500	9.5	1.17647
GtCCR4-3.0-EYFP	19600	9.6	0.882353
GtCCR4-3.0-EYFP	19700	9.7	0.882353
GtCCR4-3.0-EYFP	19800	9.8	1.17647
GtCCR4-3.0-EYFP	19900	9.9	0.882353
GtCCR4-3.0-EYFP	20000	10	0.882353
GtCCR4-3.0-EYFP	20100	10.1	1.17647
GtCCR4-3.0-EYFP	20200	10.2	0.882353
GtCCR4-3.0-EYFP	20300	10.3	0.882353
GtCCR4-3.0-EYFP	20400	10.4	1.17647
GtCCR4-3.0-EYFP	20500	10.5	0.882353
GtCCR4-3.0-EYFP	20600	10.6	1.17647
GtCCR4-3.0-EYFP	20700	10.7	1.17647
GtCCR4-3.0-EYFP	20800	10.8	0.882353
GtCCR4-3.0-EYFP	20900	10.9	1.17647
GtCCR4-3.0-EYFP	21000	11	1.17647
GtCCR4-3.0-EYFP	21100	11.1	0.882353
GtCCR4-3.0-EYFP	21200	11.2	1.17647
GtCCR4-3.0-EYFP	21300	11.3	1.17647
GtCCR4-3.0-EYFP	21400	11.4	0.882353
GtCCR4-3.0-EYFP	21500	11.5	1.17647
GtCCR4-3.0-EYFP	21600	11.6	0.882353
GtCCR4-3.0-EYFP	21700	11.7	0.882353
GtCCR4-3.0-EYFP	21800	11.8	1.17647
GtCCR4-3.0-EYFP	21900	11.9	0.882353
GtCCR4-3.0-EYFP	22000	12	0.882353
GtCCR4-3.0-EYFP	22100	12.1	1.17647
GtCCR4-3.0-EYFP	22200	12.2	0.882353
GtCCR4-3.0-EYFP	22300	12.3	0.882353
GtCCR4-3.0-EYFP	22400	12.4	1.17647
GtCCR4-3.0-EYFP	22500	12.5	0.882353
GtCCR4-3.0-EYFP	22600	12.6	0.882353
GtCCR4-3.0-EYFP	22700	12.7	1.17647
GtCCR4-3.0-EYFP	22800	12.8	0.882353
GtCCR4-3.0-EYFP	22900	12.9	0.882353
GtCCR4-3.0-EYFP	23000	13	1.17647
GtCCR4-3.0-EYFP	23100	13.1	0.882353
GtCCR4-3.0-EYFP	23200	13.2	0.882353
GtCCR4-3.0-EYFP	23300	13.3	1.17647
GtCCR4-3.0-EYFP	23400	13.4	0.882353
GtCCR4-3.0-EYFP	23500	13.5	0.882353
GtCCR4-3.0-EYFP	23600	13.6	1.17647
GtCCR4-3.0-EYFP	23700	13.7	0.882353
GtCCR4-3.0-EYFP	23800	13.8	0.882353
GtCCR4-3.0-EYFP	23900	13.9	1.17647
GtCCR4-3.0-EYFP	24000	14	0.882353
GtCCR4-3.0-EYFP	24100	14.1	0.882353
GtCCR4-3.0-EYFP	24200	14.2	1.17647
GtCCR4-3.0-EYFP	24300	14.3	0.882353
GtCCR4-3.0-EYFP	24400	14.4	0.882353
GtCCR4-3.0-EYFP	24500	14.5	1.17647
GtCCR4-3.0-EYFP	24600	14.6	0.882353
GtCCR4-3.0-EYFP	24700	14.7	0.882353
GtCCR4-3.0-EYFP	24800	14.8	1.17647
GtCCR4-3.0-EYFP	24900	14.9	0.882353
GtCCR4-3.0-EYFP	25000	15	0.882353
GtCCR4-3.0-EYFP	25100	15.1	1.17647
GtCCR4-3.0-EYFP	25200	15.2	0.882353
GtCCR4-3.0-EYFP	25300	15.3	0.882353
GtCCR4-3.0-EYFP	25400	15.4	1.17647
GtCCR4-3.0-EYFP	25500	15.5	0.882353
GtCCR4-3.0-EYFP	25600	15.6	1.17647
GtCCR4-3.0-EYFP	25700	15.7	1.17647
GtCCR4-3.0-EYFP	25800	15.8	0.882353
GtCCR4-3.0-EYFP	25900	15.9	1.17647
GtCCR4-3.0-EYFP	26000	16	1.17647
GtCCR4-3.0-EYFP	26100	16.1	0.882353
GtCCR4-3.0-EYFP	26200	16.2	1.17647
GtCCR4-3.0-EYFP	26300	16.3	1.17647
GtCCR4-3.0-EYFP	26400	16.4	0.882353
GtCCR4-3.0-EYFP	26500	16.5	1.17647
GtCCR4-3.0-EYFP	26600	16.6	0.882353
GtCCR4-3.0-EYFP	26700	16.7	0.882353
GtCCR4-3.0-EYFP	26800	16.8	1.17647
GtCCR4-3.0-EYFP	26900	16.9	0.882353
GtCCR4-3.0-EYFP	27000	17	0.882353
GtCCR4-3.0-EYFP	27100	17.1	1.17647
GtCCR4-3.0-EYFP	27200	17.2	0.882353
GtCCR4-3.0-EYFP	27300	17.3	0.882353
GtCCR4-3.0-EYFP	27400	17.4	1.17647
GtCCR4-3.0-EYFP	27500	17.5	0.882353
GtCCR4-3.0-EYFP	27600	17.6	0.882353
GtCCR4-3.0-EYFP	27700	17.7	1.17647
GtCCR4-3.0-EYFP	27800	17.8	0.882353
GtCCR4-3.0-EYFP	27900	17.9	0.882353
GtCCR4-3.0-EYFP	28000	18	1.17647
GtCCR4-3.0-EYFP	28100	18.1	0.882353
GtCCR4-3.0-EYFP	28200	18.2	0.882353
GtCCR4-3.0-EYFP	28300	18.3	1.17647
GtCCR4-3.0-EYFP	28400	18.4	0.882353
GtCCR4-3.0-EYFP	28500	18.5	0.882353
GtCCR4-3.0-EYFP	28600	18.6	1.17647
GtCCR4-3.0-EYFP	28700	18.7	0.882353
GtCCR4-3.0-EYFP	28800	18.8	1.17647
GtCCR4-3.0-EYFP	28900	18.9	1.17647
GtCCR4-3.0-EYFP	29000	19	0.882353
GtCCR4-3.0-EYFP	29100	19.1	1.17647
GtCCR4-3.0-EYFP	29200	19.2	1.17647
GtCCR4-3.0-EYFP	29300	19.3	0.882353
GtCCR4-3.0-EYFP	29400	19.4	1.17647
GtCCR4-3.0-EYFP	29500	19.5	1.17647
GtCCR4-3.0-EYFP	29600	19.6	0.882353
GtCCR4-3.0-EYFP	29700	19.7	1.17647
GtCCR4-3.0-EYFP	29800	19.8	0.882353
GtCCR4-3.0-EYFP	29900	19.9	0.882353
GtCCR4-3.0-EYFP	500	-9.5	1.14286
GtCCR4-3.0-EYFP	600	-9.4	0.857143
GtCCR4-3.0-EYFP	700	-9.3	1.14286
GtCCR4-3.0-EYFP	800	-9.2	1.14286
GtCCR4-3.0-EYFP	900	-9.1	0.857143
GtCCR4-3.0-EYFP	1000	-9	1.14286
GtCCR4-3.0-EYFP	1100	-8.9	0.857143
GtCCR4-3.0-EYFP	1200	-8.8	0.857143
GtCCR4-3.0-EYFP	1300	-8.7	1.14286
GtCCR4-3.0-EYFP	1400	-8.6	0.857143
GtCCR4-3.0-EYFP	1500	-8.5	0.857143
GtCCR4-3.0-EYFP	1600	-8.4	1.14286
GtCCR4-3.0-EYFP	1700	-8.3	0.857143
GtCCR4-3.0-EYFP	1800	-8.2	0.857143
GtCCR4-3.0-EYFP	1900	-8.1	1.14286
GtCCR4-3.0-EYFP	2000	-8	0.857143
GtCCR4-3.0-EYFP	2100	-7.9	0.857143
GtCCR4-3.0-EYFP	2200	-7.8	1.14286
GtCCR4-3.0-EYFP	2300	-7.7	0.857143
GtCCR4-3.0-EYFP	2400	-7.6	0.857143
GtCCR4-3.0-EYFP	2500	-7.5	1.14286
GtCCR4-3.0-EYFP	2600	-7.4	0.857143
GtCCR4-3.0-EYFP	2700	-7.3	0.857143
GtCCR4-3.0-EYFP	2800	-7.2	1.14286
GtCCR4-3.0-EYFP	2900	-7.1	0.857143
GtCCR4-3.0-EYFP	3000	-7	1.14286
GtCCR4-3.0-EYFP	3100	-6.9	1.14286
GtCCR4-3.0-EYFP	3200	-6.8	0.857143
GtCCR4-3.0-EYFP	3300	-6.7	1.14286
GtCCR4-3.0-EYFP	3400	-6.6	1.14286
GtCCR4-3.0-EYFP	3500	-6.5	0.857143
GtCCR4-3.0-EYFP	3600	-6.4	1.14286
GtCCR4-3.0-EYFP	3700	-6.3	1.14286
GtCCR4-3.0-EYFP	3800	-6.2	0.857143
GtCCR4-3.0-EYFP	3900	-6.1	1.14286
GtCCR4-3.0-EYFP	4000	-6	0.857143
GtCCR4-3.0-EYFP	4100	-5.9	0.857143
GtCCR4-3.0-EYFP	4200	-5.8	1.14286
GtCCR4-3.0-EYFP	4300	-5.7	0.857143
GtCCR4-3.0-EYFP	4400	-5.6	0.857143
GtCCR4-3.0-EYFP	4500	-5.5	1.14286
GtCCR4-3.0-EYFP	4600	-5.4	0.857143
GtCCR4-3.0-EYFP	4700	-5.3	0.857143
GtCCR4-3.0-EYFP	4800	-5.2	1.14286
GtCCR4-3.0-EYFP	4900	-5.1	0.857143
GtCCR4-3.0-EYFP	5000	-5	0.857143
GtCCR4-3.0-EYFP	5100	-4.9	1.14286
GtCCR4-3.0-EYFP	5200	-4.8	0.857143
GtCCR4-3.0-EYFP	5300	-4.7	0.857143
GtCCR4-3.0-EYFP	5400	-4.6	1.14286
GtCCR4-3.0-EYFP	5500	-4.5	0.857143
GtCCR4-3.0-EYFP	5600	-4.4	0.857143
GtCCR4-3.0-EYFP	5700	-4.3	1.14286
GtCCR4-3.0-EYFP	5800	-4.2	0.857143
GtCCR4-3.0-EYFP	5900	-4.1	1.14286
GtCCR4-3.0-EYFP	6000	-4	1.14286
GtCCR4-3.0-EYFP	6100	-3.9	0.857143
GtCCR4-3.0-EYFP	6200	-3.8	1.14286
GtCCR4-3.0-EYFP	6300	-3.7	1.14286
GtCCR4-3.0-EYFP	6400	-3.6	0.857143
GtCCR4-3.0-EYFP	6500	-3.5	1.14286
GtCCR4-3.0-EYFP	6600	-3.4	1.14286
GtCCR4-3.0-EYFP	6700	-3.3	0.857143
GtCCR4-3.0-EYFP	6800	-3.2	1.14286
GtCCR4-3.0-EYFP	6900	-3.1	0.857143
GtCCR4-3.0-EYFP	7000	-3	0.857143
GtCCR4-3.0-EYFP	7100	-2.9	1.14286
GtCCR4-3.0-EYFP	7200	-2.8	0.857143
GtCCR4-3.0-EYFP	7300	-2.7	0.857143
GtCCR4-3.0-EYFP	7400	-2.6	1.14286
GtCCR4-3.0-EYFP	7500	-2.5	0.857143
GtCCR4-3.0-EYFP	7600	-2.4	0.857143
GtCCR4-3.0-EYFP	7700	-2.3	1.14286
GtCCR4-3.0-EYFP	7800	-2.2	0.857143
GtCCR4-3.0-EYFP	7900	-2.1	1.14286
GtCCR4-3.0-EYFP	8000	-2	1.14286
GtCCR4-3.0-EYFP	8100	-1.9	0.857143
GtCCR4-3.0-EYFP	8200	-1.8	1.14286
GtCCR4-3.0-EYFP	8300	-1.7	1.14286
GtCCR4-3.0-EYFP	8400	-1.6	0.857143
GtCCR4-3.0-EYFP	8500	-1.5	1.14286
GtCCR4-3.0-EYFP	8600	-1.4	1.14286
GtCCR4-3.0-EYFP	8700	-1.3	0.857143
GtCCR4-3.0-EYFP	8800	-1.2	1.14286
GtCCR4-3.0-EYFP	8900	-1.1	0.857143
GtCCR4-3.0-EYFP	9000	-1	0.857143
GtCCR4-3.0-EYFP	9100	-0.9	1.14286
GtCCR4-3.0-EYFP	9200	-0.8	0.857143
GtCCR4-3.0-EYFP	9300	-0.7	0.857143
GtCCR4-3.0-EYFP	9400	-0.6	1.14286
GtCCR4-3.0-EYFP	9500	-0.5	0.857143
GtCCR4-3.0-EYFP	9600	-0.4	0.857143
GtCCR4-3.0-EYFP	9700	-0.3	0.857143
GtCCR4-3.0-EYFP	9800	-0.2	0.571429
GtCCR4-3.0-EYFP	9900	-0.1	0.571429
GtCCR4-3.0-EYFP	10000	0	0.857143
GtCCR4-3.0-EYFP	10100	0.1	0.571429
GtCCR4-3.0-EYFP	10200	0.2	0.571429
GtCCR4-3.0-EYFP	10300	0.3	0.857143
GtCCR4-3.0-EYFP	10400	0.4	0.571429
GtCCR4-3.0-EYFP	10500	0.5	0.571429
GtCCR4-3.0-EYFP	10600	0.6	0.857143
GtCCR4-3.0-EYFP	10700	0.7	0.857143
GtCCR4-3.0-EYFP	10800	0.8	0.857143
GtCCR4-3.0-EYFP	10900	0.9	1.14286
GtCCR4-3.0-EYFP	11000	1	0.857143
GtCCR4-3.0-EYFP	11100	1.1	0.857143
GtCCR4-3.0-EYFP	11200	1.2	1.14286
GtCCR4-3.0-EYFP	11300	1.3	0.857143
GtCCR4-3.0-EYFP	11400	1.4	0.857143
GtCCR4-3.0-EYFP	11500	1.5	1.14286
GtCCR4-3.0-EYFP	11600	1.6	0.857143
GtCCR4-3.0-EYFP	11700	1.7	0.857143
GtCCR4-3.0-EYFP	11800	1.8	1.14286
GtCCR4-3.0-EYFP	11900	1.9	0.857143
GtCCR4-3.0-EYFP	12000	2	0.857143
GtCCR4-3.0-EYFP	12100	2.1	1.14286
GtCCR4-3.0-EYFP	12200	2.2	0.857143
GtCCR4-3.0-EYFP	12300	2.3	0.857143
GtCCR4-3.0-EYFP	12400	2.4	1.14286
GtCCR4-3.0-EYFP	12500	2.5	0.857143
GtCCR4-3.0-EYFP	12600	2.6	0.857143
GtCCR4-3.0-EYFP	12700	2.7	1.14286
GtCCR4-3.0-EYFP	12800	2.8	0.857143
GtCCR4-3.0-EYFP	12900	2.9	0.857143
GtCCR4-3.0-EYFP	13000	3	1.14286
GtCCR4-3.0-EYFP	13100	3.1	0.857143
GtCCR4-3.0-EYFP	13200	3.2	0.857143
GtCCR4-3.0-EYFP	13300	3.3	1.14286
GtCCR4-3.0-EYFP	13400	3.4	0.857143
GtCCR4-3.0-EYFP	13500	3.5	0.857143
GtCCR4-3.0-EYFP	13600	3.6	1.14286
GtCCR4-3.0-EYFP	13700	3.7	0.857143
GtCCR4-3.0-EYFP	13800	3.8	0.857143
GtCCR4-3.0-EYFP	13900	3.9	1.14286
GtCCR4-3.0-EYFP	14000	4	0.857143
GtCCR4-3.0-EYFP	14100	4.1	0.857143
GtCCR4-3.0-EYFP	14200	4.2	1.14286
GtCCR4-3.0-EYFP	14300	4.3	0.857143
GtCCR4-3.0-EYFP	14400	4.4	0.857143
GtCCR4-3.0-EYFP	14500	4.5	1.14286
GtCCR4-3.0-EYFP	14600	4.6	0.857143
GtCCR4-3.0-EYFP	14700	4.7	0.857143
GtCCR4-3.0-EYFP	14800	4.8	1.14286
GtCCR4-3.0-EYFP	14900	4.9	0.857143
GtCCR4-3.0-EYFP	15000	5	0.857143
GtCCR4-3.0-EYFP	15100	5.1	1.14286
GtCCR4-3.0-EYFP	15200	5.2	0.857143
GtCCR4-3.0-EYFP	15300	5.3	0.857143
GtCCR4-3.0-EYFP	15400	5.4	1.14286
GtCCR4-3.0-EYFP	15500	5.5	0.857143
GtCCR4-3.0-EYFP	15600	5.6	0.857143
GtCCR4-3.0-EYFP	15700	5.7	1.14286
GtCCR4-3.0-EYFP	15800	5.8	0.857143
GtCCR4-3.0-EYFP	15900	5.9	1.14286
GtCCR4-3.0-EYFP	16000	6	1.14286
GtCCR4-3.0-EYFP	16100	6.1	0.857143
GtCCR4-3.0-EYFP	16200	6.2	1.14286
GtCCR4-3.0-EYFP	16300	6.3	1.14286
GtCCR4-3.0-EYFP	16400	6.4	0.857143
GtCCR4-3.0-EYFP	16500	6.5	1.14286
GtCCR4-3.0-EYFP	16600	6.6	1.14286
GtCCR4-3.0-EYFP	16700	6.7	0.857143
GtCCR4-3.0-EYFP	16800	6.8	1.14286
GtCCR4-3.0-EYFP	16900	6.9	0.857143
GtCCR4-3.0-EYFP	17000	7	0.857143
GtCCR4-3.0-EYFP	17100	7.1	1.14286
GtCCR4-3.0-EYFP	17200	7.2	0.857143
GtCCR4-3.0-EYFP	17300	7.3	0.857143
GtCCR4-3.0-EYFP	17400	7.4	1.14286
GtCCR4-3.0-EYFP	17500	7.5	0.857143
GtCCR4-3.0-EYFP	17600	7.6	0.857143
GtCCR4-3.0-EYFP	17700	7.7	1.14286
GtCCR4-3.0-EYFP	17800	7.8	0.857143
GtCCR4-3.0-EYFP	17900	7.9	0.857143
GtCCR4-3.0-EYFP	18000	8	1.14286
GtCCR4-3.0-EYFP	18100	8.1	0.857143
GtCCR4-3.0-EYFP	18200	8.2	0.857143
GtCCR4-3.0-EYFP	18300	8.3	1.14286
GtCCR4-3.0-EYFP	18400	8.4	0.857143
GtCCR4-3.0-EYFP	18500	8.5	0.857143
GtCCR4-3.0-EYFP	18600	8.6	1.14286
GtCCR4-3.0-EYFP	18700	8.7	0.857143
GtCCR4-3.0-EYFP	18800	8.8	0.857143
GtCCR4-3.0-EYFP	18900	8.9	1.14286
GtCCR4-3.0-EYFP	19000	9	0.857143
GtCCR4-3.0-EYFP	19100	9.1	0.857143
GtCCR4-3.0-EYFP	19200	9.2	1.14286
GtCCR4-3.0-EYFP	19300	9.3	0.857143
GtCCR4-3.0-EYFP	19400	9.4	0.857143
GtCCR4-3.0-EYFP	19500	9.5	1.14286
GtCCR4-3.0-EYFP	19600	9.6	0.857143
GtCCR4-3.0-EYFP	19700	9.7	1.14286
GtCCR4-3.0-EYFP	19800	9.8	1.14286
GtCCR4-3.0-EYFP	19900	9.9	0.857143
GtCCR4-3.0-EYFP	20000	10	1.14286
GtCCR4-3.0-EYFP	20100	10.1	1.14286
GtCCR4-3.0-EYFP	20200	10.2	0.857143
GtCCR4-3.0-EYFP	20300	10.3	1.14286
GtCCR4-3.0-EYFP	20400	10.4	1.14286
GtCCR4-3.0-EYFP	20500	10.5	0.857143
GtCCR4-3.0-EYFP	20600	10.6	1.14286
GtCCR4-3.0-EYFP	20700	10.7	0.857143
GtCCR4-3.0-EYFP	20800	10.8	0.857143
GtCCR4-3.0-EYFP	20900	10.9	1.14286
GtCCR4-3.0-EYFP	21000	11	0.857143
GtCCR4-3.0-EYFP	21100	11.1	0.857143
GtCCR4-3.0-EYFP	21200	11.2	1.14286
GtCCR4-3.0-EYFP	21300	11.3	0.857143
GtCCR4-3.0-EYFP	21400	11.4	0.857143
GtCCR4-3.0-EYFP	21500	11.5	1.14286
GtCCR4-3.0-EYFP	21600	11.6	0.857143
GtCCR4-3.0-EYFP	21700	11.7	0.857143
GtCCR4-3.0-EYFP	21800	11.8	1.14286
GtCCR4-3.0-EYFP	21900	11.9	0.857143
GtCCR4-3.0-EYFP	22000	12	0.857143
GtCCR4-3.0-EYFP	22100	12.1	1.14286
GtCCR4-3.0-EYFP	22200	12.2	0.857143
GtCCR4-3.0-EYFP	22300	12.3	0.857143
GtCCR4-3.0-EYFP	22400	12.4	1.14286
GtCCR4-3.0-EYFP	22500	12.5	0.857143
GtCCR4-3.0-EYFP	22600	12.6	0.857143
GtCCR4-3.0-EYFP	22700	12.7	1.14286
GtCCR4-3.0-EYFP	22800	12.8	0.857143
GtCCR4-3.0-EYFP	22900	12.9	0.857143
GtCCR4-3.0-EYFP	23000	13	1.14286
GtCCR4-3.0-EYFP	23100	13.1	0.857143
GtCCR4-3.0-EYFP	23200	13.2	0.857143
GtCCR4-3.0-EYFP	23300	13.3	1.14286
GtCCR4-3.0-EYFP	23400	13.4	0.857143
GtCCR4-3.0-EYFP	23500	13.5	0.857143
GtCCR4-3.0-EYFP	23600	13.6	1.14286
GtCCR4-3.0-EYFP	23700	13.7	0.857143
GtCCR4-3.0-EYFP	23800	13.8	0.857143
GtCCR4-3.0-EYFP	23900	13.9	1.14286
GtCCR4-3.0-EYFP	24000	14	0.857143
GtCCR4-3.0-EYFP	24100	14.1	1.14286
GtCCR4-3.0-EYFP	24200	14.2	1.14286
GtCCR4-3.0-EYFP	24300	14.3	0.857143
GtCCR4-3.0-EYFP	24400	14.4	1.14286
GtCCR4-3.0-EYFP	24500	14.5	1.14286
GtCCR4-3.0-EYFP	24600	14.6	0.857143
GtCCR4-3.0-EYFP	24700	14.7	1.14286
GtCCR4-3.0-EYFP	24800	14.8	1.14286
GtCCR4-3.0-EYFP	24900	14.9	0.857143
GtCCR4-3.0-EYFP	25000	15	1.14286
GtCCR4-3.0-EYFP	25100	15.1	0.857143
GtCCR4-3.0-EYFP	25200	15.2	0.857143
GtCCR4-3.0-EYFP	25300	15.3	1.14286
GtCCR4-3.0-EYFP	25400	15.4	0.857143
GtCCR4-3.0-EYFP	25500	15.5	0.857143
GtCCR4-3.0-EYFP	25600	15.6	1.14286
GtCCR4-3.0-EYFP	25700	15.7	0.857143
GtCCR4-3.0-EYFP	25800	15.8	0.857143
GtCCR4-3.0-EYFP	25900	15.9	1.14286
GtCCR4-3.0-EYFP	26000	16	0.857143
GtCCR4-3.0-EYFP	26100	16.1	0.857143
GtCCR4-3.0-EYFP	26200	16.2	1.14286
GtCCR4-3.0-EYFP	26300	16.3	0.857143
GtCCR4-3.0-EYFP	26400	16.4	0.857143
GtCCR4-3.0-EYFP	26500	16.5	1.14286
GtCCR4-3.0-EYFP	26600	16.6	0.857143
GtCCR4-3.0-EYFP	26700	16.7	0.857143
GtCCR4-3.0-EYFP	26800	16.8	1.14286
GtCCR4-3.0-EYFP	26900	16.9	0.857143
GtCCR4-3.0-EYFP	27000	17	0.857143
GtCCR4-3.0-EYFP	27100	17.1	1.14286
GtCCR4-3.0-EYFP	27200	17.2	0.857143
GtCCR4-3.0-EYFP	27300	17.3	1.14286
GtCCR4-3.0-EYFP	27400	17.4	1.14286
GtCCR4-3.0-EYFP	27500	17.5	0.857143
GtCCR4-3.0-EYFP	27600	17.6	1.14286
GtCCR4-3.0-EYFP	27700	17.7	1.14286
GtCCR4-3.0-EYFP	27800	17.8	0.857143
GtCCR4-3.0-EYFP	27900	17.9	1.14286
GtCCR4-3.0-EYFP	28000	18	1.14286
GtCCR4-3.0-EYFP	28100	18.1	0.857143
GtCCR4-3.0-EYFP	28200	18.2	1.14286
GtCCR4-3.0-EYFP	28300	18.3	0.857143
GtCCR4-3.0-EYFP	28400	18.4	0.857143
GtCCR4-3.0-EYFP	28500	18.5	1.14286
GtCCR4-3.0-EYFP	28600	18.6	0.857143
GtCCR4-3.0-EYFP	28700	18.7	0.857143
GtCCR4-3.0-EYFP	28800	18.8	1.14286
GtCCR4-3.0-EYFP	28900	18.9	0.857143
GtCCR4-3.0-EYFP	29000	19	0.857143
GtCCR4-3.0-EYFP	29100	19.1	1.14286
GtCCR4-3.0-EYFP	29200	19.2	0.857143
GtCCR4-3.0-EYFP	29300	19.3	0.857143
GtCCR4-3.0-EYFP	29400	19.4	1.14286
GtCCR4-3.0-EYFP	29500	19.5	0.857143
GtCCR4-3.0-EYFP	29600	19.6	0.857143
GtCCR4-3.0-EYFP	29700	19.7	1.14286
GtCCR4-3.0-EYFP	29800	19.8	0.857143
GtCCR4-3.0-EYFP	29900	19.9	1.14286
GtCCR4-3.0-EYFP	500	-9.5	0.882353
GtCCR4-3.0-EYFP	600	-9.4	0.882353
GtCCR4-3.0-EYFP	700	-9.3	0.882353
GtCCR4-3.0-EYFP	800	-9.2	0.882353
GtCCR4-3.0-EYFP	900	-9.1	1.17647
GtCCR4-3.0-EYFP	1000	-9	0.882353
GtCCR4-3.0-EYFP	1100	-8.9	1.17647
GtCCR4-3.0-EYFP	1200	-8.8	1.17647
GtCCR4-3.0-EYFP	1300	-8.7	0.882353
GtCCR4-3.0-EYFP	1400	-8.6	1.17647
GtCCR4-3.0-EYFP	1500	-8.5	1.17647
GtCCR4-3.0-EYFP	1600	-8.4	0.882353
GtCCR4-3.0-EYFP	1700	-8.3	1.17647
GtCCR4-3.0-EYFP	1800	-8.2	1.17647
GtCCR4-3.0-EYFP	1900	-8.1	0.882353
GtCCR4-3.0-EYFP	2000	-8	1.17647
GtCCR4-3.0-EYFP	2100	-7.9	0.882353
GtCCR4-3.0-EYFP	2200	-7.8	0.882353
GtCCR4-3.0-EYFP	2300	-7.7	1.17647
GtCCR4-3.0-EYFP	2400	-7.6	0.882353
GtCCR4-3.0-EYFP	2500	-7.5	0.882353
GtCCR4-3.0-EYFP	2600	-7.4	1.17647
GtCCR4-3.0-EYFP	2700	-7.3	0.882353
GtCCR4-3.0-EYFP	2800	-7.2	0.882353
GtCCR4-3.0-EYFP	2900	-7.1	1.17647
GtCCR4-3.0-EYFP	3000	-7	0.882353
GtCCR4-3.0-EYFP	3100	-6.9	0.882353
GtCCR4-3.0-EYFP	3200	-6.8	1.17647
GtCCR4-3.0-EYFP	3300	-6.7	0.882353
GtCCR4-3.0-EYFP	3400	-6.6	0.882353
GtCCR4-3.0-EYFP	3500	-6.5	1.17647
GtCCR4-3.0-EYFP	3600	-6.4	0.882353
GtCCR4-3.0-EYFP	3700	-6.3	1.17647
GtCCR4-3.0-EYFP	3800	-6.2	1.17647
GtCCR4-3.0-EYFP	3900	-6.1	0.882353
GtCCR4-3.0-EYFP	4000	-6	1.17647
GtCCR4-3.0-EYFP	4100	-5.9	1.17647
GtCCR4-3.0-EYFP	4200	-5.8	0.882353
GtCCR4-3.0-EYFP	4300	-5.7	1.17647
GtCCR4-3.0-EYFP	4400	-5.6	1.17647
GtCCR4-3.0-EYFP	4500	-5.5	0.882353
GtCCR4-3.0-EYFP	4600	-5.4	1.17647
GtCCR4-3.0-EYFP	4700	-5.3	0.882353
GtCCR4-3.0-EYFP	4800	-5.2	0.882353
GtCCR4-3.0-EYFP	4900	-5.1	1.17647
GtCCR4-3.0-EYFP	5000	-5	0.882353
GtCCR4-3.0-EYFP	5100	-4.9	0.882353
GtCCR4-3.0-EYFP	5200	-4.8	1.17647
GtCCR4-3.0-EYFP	5300	-4.7	0.882353
GtCCR4-3.0-EYFP	5400	-4.6	0.882353
GtCCR4-3.0-EYFP	5500	-4.5	1.17647
GtCCR4-3.0-EYFP	5600	-4.4	0.882353
GtCCR4-3.0-EYFP	5700	-4.3	0.882353
GtCCR4-3.0-EYFP	5800	-4.2	1.17647
GtCCR4-3.0-EYFP	5900	-4.1	0.882353
GtCCR4-3.0-EYFP	6000	-4	0.882353
GtCCR4-3.0-EYFP	6100	-3.9	1.17647
GtCCR4-3.0-EYFP	6200	-3.8	0.882353
GtCCR4-3.0-EYFP	6300	-3.7	0.882353
GtCCR4-3.0-EYFP	6400	-3.6	1.17647
GtCCR4-3.0-EYFP	6500	-3.5	0.882353
GtCCR4-3.0-EYFP	6600	-3.4	0.882353
GtCCR4-3.0-EYFP	6700	-3.3	1.17647
GtCCR4-3.0-EYFP	6800	-3.2	0.882353
GtCCR4-3.0-EYFP	6900	-3.1	1.17647
GtCCR4-3.0-EYFP	7000	-3	1.17647
GtCCR4-3.0-EYFP	7100	-2.9	0.882353
GtCCR4-3.0-EYFP	7200	-2.8	1.17647
GtCCR4-3.0-EYFP	7300	-2.7	1.17647
GtCCR4-3.0-EYFP	7400	-2.6	0.882353
GtCCR4-3.0-EYFP	7500	-2.5	1.17647
GtCCR4-3.0-EYFP	7600	-2.4	1.17647
GtCCR4-3.0-EYFP	7700	-2.3	0.882353
GtCCR4-3.0-EYFP	7800	-2.2	1.17647
GtCCR4-3.0-EYFP	7900	-2.1	0.882353
GtCCR4-3.0-EYFP	8000	-2	0.882353
GtCCR4-3.0-EYFP	8100	-1.9	1.17647
GtCCR4-3.0-EYFP	8200	-1.8	0.882353
GtCCR4-3.0-EYFP	8300	-1.7	0.882353
GtCCR4-3.0-EYFP	8400	-1.6	1.17647
GtCCR4-3.0-EYFP	8500	-1.5	0.882353
GtCCR4-3.0-EYFP	8600	-1.4	0.882353
GtCCR4-3.0-EYFP	8700	-1.3	1.17647
GtCCR4-3.0-EYFP	8800	-1.2	0.882353
GtCCR4-3.0-EYFP	8900	-1.1	0.882353
GtCCR4-3.0-EYFP	9000	-1	1.17647
GtCCR4-3.0-EYFP	9100	-0.9	0.882353
GtCCR4-3.0-EYFP	9200	-0.8	0.882353
GtCCR4-3.0-EYFP	9300	-0.7	1.17647
GtCCR4-3.0-EYFP	9400	-0.6	0.882353
GtCCR4-3.0-EYFP	9500	-0.5	0.882353
GtCCR4-3.0-EYFP	9600	-0.4	1.17647
GtCCR4-3.0-EYFP	9700	-0.3	0.882353
GtCCR4-3.0-EYFP	9800	-0.2	0.882353
GtCCR4-3.0-EYFP	9900	-0.1	0.882353
GtCCR4-3.0-EYFP	10000	0	0.588235
GtCCR4-3.0-EYFP	10100	0.1	0.882353
GtCCR4-3.0-EYFP	10200	0.2	0.882353
GtCCR4-3.0-EYFP	10300	0.3	0.588235
GtCCR4-3.0-EYFP	10400	0.4	0.882353
GtCCR4-3.0-EYFP	10500	0.5	0.882353
GtCCR4-3.0-EYFP	10600	0.6	0.588235
GtCCR4-3.0-EYFP	10700	0.7	0.882353
GtCCR4-3.0-EYFP	10800	0.8	0.882353
GtCCR4-3.0-EYFP	10900	0.9	0.882353
GtCCR4-3.0-EYFP	11000	1	1.17647
GtCCR4-3.0-EYFP	11100	1.1	0.882353
GtCCR4-3.0-EYFP	11200	1.2	0.882353
GtCCR4-3.0-EYFP	11300	1.3	1.17647
GtCCR4-3.0-EYFP	11400	1.4	0.882353
GtCCR4-3.0-EYFP	11500	1.5	0.882353
GtCCR4-3.0-EYFP	11600	1.6	1.17647
GtCCR4-3.0-EYFP	11700	1.7	0.882353
GtCCR4-3.0-EYFP	11800	1.8	0.882353
GtCCR4-3.0-EYFP	11900	1.9	1.17647
GtCCR4-3.0-EYFP	12000	2	0.882353
GtCCR4-3.0-EYFP	12100	2.1	0.882353
GtCCR4-3.0-EYFP	12200	2.2	1.17647
GtCCR4-3.0-EYFP	12300	2.3	0.882353
GtCCR4-3.0-EYFP	12400	2.4	0.882353
GtCCR4-3.0-EYFP	12500	2.5	1.17647
GtCCR4-3.0-EYFP	12600	2.6	0.882353
GtCCR4-3.0-EYFP	12700	2.7	0.882353
GtCCR4-3.0-EYFP	12800	2.8	1.17647
GtCCR4-3.0-EYFP	12900	2.9	0.882353
GtCCR4-3.0-EYFP	13000	3	0.882353
GtCCR4-3.0-EYFP	13100	3.1	1.17647
GtCCR4-3.0-EYFP	13200	3.2	0.882353
GtCCR4-3.0-EYFP	13300	3.3	0.882353
GtCCR4-3.0-EYFP	13400	3.4	1.17647
GtCCR4-3.0-EYFP	13500	3.5	0.882353
GtCCR4-3.0-EYFP	13600	3.6	0.882353
GtCCR4-3.0-EYFP	13700	3.7	1.17647
GtCCR4-3.0-EYFP	13800	3.8	0.882353
GtCCR4-3.0-EYFP	13900	3.9	0.882353
GtCCR4-3.0-EYFP	14000	4	1.17647
GtCCR4-3.0-EYFP	14100	4.1	0.882353
GtCCR4-3.0-EYFP	14200	4.2	0.882353
GtCCR4-3.0-EYFP	14300	4.3	1.17647
GtCCR4-3.0-EYFP	14400	4.4	0.882353
GtCCR4-3.0-EYFP	14500	4.5	0.882353
GtCCR4-3.0-EYFP	14600	4.6	1.17647
GtCCR4-3.0-EYFP	14700	4.7	0.882353
GtCCR4-3.0-EYFP	14800	4.8	1.17647
GtCCR4-3.0-EYFP	14900	4.9	1.17647
GtCCR4-3.0-EYFP	15000	5	0.882353
GtCCR4-3.0-EYFP	15100	5.1	1.17647
GtCCR4-3.0-EYFP	15200	5.2	1.17647
GtCCR4-3.0-EYFP	15300	5.3	0.882353
GtCCR4-3.0-EYFP	15400	5.4	1.17647
GtCCR4-3.0-EYFP	15500	5.5	1.17647
GtCCR4-3.0-EYFP	15600	5.6	0.882353
GtCCR4-3.0-EYFP	15700	5.7	1.17647
GtCCR4-3.0-EYFP	15800	5.8	0.882353
GtCCR4-3.0-EYFP	15900	5.9	0.882353
GtCCR4-3.0-EYFP	16000	6	1.17647
GtCCR4-3.0-EYFP	16100	6.1	0.882353
GtCCR4-3.0-EYFP	16200	6.2	0.882353
GtCCR4-3.0-EYFP	16300	6.3	1.17647
GtCCR4-3.0-EYFP	16400	6.4	0.882353
GtCCR4-3.0-EYFP	16500	6.5	0.882353
GtCCR4-3.0-EYFP	16600	6.6	1.17647
GtCCR4-3.0-EYFP	16700	6.7	0.882353
GtCCR4-3.0-EYFP	16800	6.8	0.882353
GtCCR4-3.0-EYFP	16900	6.9	1.17647
GtCCR4-3.0-EYFP	17000	7	0.882353
GtCCR4-3.0-EYFP	17100	7.1	0.882353
GtCCR4-3.0-EYFP	17200	7.2	1.17647
GtCCR4-3.0-EYFP	17300	7.3	0.882353
GtCCR4-3.0-EYFP	17400	7.4	0.882353
GtCCR4-3.0-EYFP	17500	7.5	1.17647
GtCCR4-3.0-EYFP	17600	7.6	0.882353
GtCCR4-3.0-EYFP	17700	7.7	0.882353
GtCCR4-3.0-EYFP	17800	7.8	1.17647
GtCCR4-3.0-EYFP	17900	7.9	0.882353
GtCCR4-3.0-EYFP	18000	8	0.882353
GtCCR4-3.0-EYFP	18100	8.1	1.17647
GtCCR4-3.0-EYFP	18200	8.2	0.882353
GtCCR4-3.0-EYFP	18300	8.3	0.882353
GtCCR4-3.0-EYFP	18400	8.4	1.17647
GtCCR4-3.0-EYFP	18500	8.5	0.882353
GtCCR4-3.0-EYFP	18600	8.6	0.882353
GtCCR4-3.0-EYFP	18700	8.7	1.17647
GtCCR4-3.0-EYFP	18800	8.8	0.882353
GtCCR4-3.0-EYFP	18900	8.9	0.882353
GtCCR4-3.0-EYFP	19000	9	1.17647
GtCCR4-3.0-EYFP	19100	9.1	0.882353
GtCCR4-3.0-EYFP	19200	9.2	0.882353
GtCCR4-3.0-EYFP	19300	9.3	1.17647
GtCCR4-3.0-EYFP	19400	9.4	0.882353
GtCCR4-3.0-EYFP	19500	9.5	0.882353
GtCCR4-3.0-EYFP	19600	9.6	1.17647
GtCCR4-3.0-EYFP	19700	9.7	0.882353
GtCCR4-3.0-EYFP	19800	9.8	1.17647
GtCCR4-3.0-EYFP	19900	9.9	1.17647
GtCCR4-3.0-EYFP	20000	10	0.882353
GtCCR4-3.0-EYFP	20100	10.1	1.17647
GtCCR4-3.0-EYFP	20200	10.2	1.17647
GtCCR4-3.0-EYFP	20300	10.3	0.882353
GtCCR4-3.0-EYFP	20400	10.4	1.17647
GtCCR4-3.0-EYFP	20500	10.5	1.17647
GtCCR4-3.0-EYFP	20600	10.6	0.882353
GtCCR4-3.0-EYFP	20700	10.7	1.17647
GtCCR4-3.0-EYFP	20800	10.8	0.882353
GtCCR4-3.0-EYFP	20900	10.9	0.882353
GtCCR4-3.0-EYFP	21000	11	1.17647
GtCCR4-3.0-EYFP	21100	11.1	0.882353
GtCCR4-3.0-EYFP	21200	11.2	0.882353
GtCCR4-3.0-EYFP	21300	11.3	1.17647
GtCCR4-3.0-EYFP	21400	11.4	0.882353
GtCCR4-3.0-EYFP	21500	11.5	0.882353
GtCCR4-3.0-EYFP	21600	11.6	1.17647
GtCCR4-3.0-EYFP	21700	11.7	0.882353
GtCCR4-3.0-EYFP	21800	11.8	0.882353
GtCCR4-3.0-EYFP	21900	11.9	1.17647
GtCCR4-3.0-EYFP	22000	12	0.882353
GtCCR4-3.0-EYFP	22100	12.1	0.882353
GtCCR4-3.0-EYFP	22200	12.2	1.17647
GtCCR4-3.0-EYFP	22300	12.3	0.882353
GtCCR4-3.0-EYFP	22400	12.4	0.882353
GtCCR4-3.0-EYFP	22500	12.5	1.17647
GtCCR4-3.0-EYFP	22600	12.6	0.882353
GtCCR4-3.0-EYFP	22700	12.7	0.882353
GtCCR4-3.0-EYFP	22800	12.8	1.17647
GtCCR4-3.0-EYFP	22900	12.9	0.882353
GtCCR4-3.0-EYFP	23000	13	0.882353
GtCCR4-3.0-EYFP	23100	13.1	1.17647
GtCCR4-3.0-EYFP	23200	13.2	0.882353
GtCCR4-3.0-EYFP	23300	13.3	0.882353
GtCCR4-3.0-EYFP	23400	13.4	1.17647
GtCCR4-3.0-EYFP	23500	13.5	0.882353
GtCCR4-3.0-EYFP	23600	13.6	0.882353
GtCCR4-3.0-EYFP	23700	13.7	1.17647
GtCCR4-3.0-EYFP	23800	13.8	0.882353
GtCCR4-3.0-EYFP	23900	13.9	1.17647
GtCCR4-3.0-EYFP	24000	14	1.17647
GtCCR4-3.0-EYFP	24100	14.1	0.882353
GtCCR4-3.0-EYFP	24200	14.2	1.17647
GtCCR4-3.0-EYFP	24300	14.3	1.17647
GtCCR4-3.0-EYFP	24400	14.4	0.882353
GtCCR4-3.0-EYFP	24500	14.5	1.17647
GtCCR4-3.0-EYFP	24600	14.6	1.17647
GtCCR4-3.0-EYFP	24700	14.7	0.882353
GtCCR4-3.0-EYFP	24800	14.8	1.17647
GtCCR4-3.0-EYFP	24900	14.9	0.882353
GtCCR4-3.0-EYFP	25000	15	0.882353
GtCCR4-3.0-EYFP	25100	15.1	1.17647
GtCCR4-3.0-EYFP	25200	15.2	0.882353
GtCCR4-3.0-EYFP	25300	15.3	0.882353
GtCCR4-3.0-EYFP	25400	15.4	1.17647
GtCCR4-3.0-EYFP	25500	15.5	0.882353
GtCCR4-3.0-EYFP	25600	15.6	0.882353
GtCCR4-3.0-EYFP	25700	15.7	1.17647
GtCCR4-3.0-EYFP	25800	15.8	0.882353
GtCCR4-3.0-EYFP	25900	15.9	0.882353
GtCCR4-3.0-EYFP	26000	16	1.17647
GtCCR4-3.0-EYFP	26100	16.1	0.882353
GtCCR4-3.0-EYFP	26200	16.2	0.882353
GtCCR4-3.0-EYFP	26300	16.3	1.17647
GtCCR4-3.0-EYFP	26400	16.4	0.882353
GtCCR4-3.0-EYFP	26500	16.5	0.882353
GtCCR4-3.0-EYFP	26600	16.6	1.17647
GtCCR4-3.0-EYFP	26700	16.7	0.882353
GtCCR4-3.0-EYFP	26800	16.8	0.882353
GtCCR4-3.0-EYFP	26900	16.9	1.17647
GtCCR4-3.0-EYFP	27000	17	0.882353
GtCCR4-3.0-EYFP	27100	17.1	1.17647
GtCCR4-3.0-EYFP	27200	17.2	1.17647
GtCCR4-3.0-EYFP	27300	17.3	0.882353
GtCCR4-3.0-EYFP	27400	17.4	1.17647
GtCCR4-3.0-EYFP	27500	17.5	1.17647
GtCCR4-3.0-EYFP	27600	17.6	0.882353
GtCCR4-3.0-EYFP	27700	17.7	1.17647
GtCCR4-3.0-EYFP	27800	17.8	1.17647
GtCCR4-3.0-EYFP	27900	17.9	0.882353
GtCCR4-3.0-EYFP	28000	18	1.17647
GtCCR4-3.0-EYFP	28100	18.1	0.882353
GtCCR4-3.0-EYFP	28200	18.2	0.882353
GtCCR4-3.0-EYFP	28300	18.3	1.17647
GtCCR4-3.0-EYFP	28400	18.4	0.882353
GtCCR4-3.0-EYFP	28500	18.5	0.882353
GtCCR4-3.0-EYFP	28600	18.6	1.17647
GtCCR4-3.0-EYFP	28700	18.7	0.882353
GtCCR4-3.0-EYFP	28800	18.8	0.882353
GtCCR4-3.0-EYFP	28900	18.9	1.17647
GtCCR4-3.0-EYFP	29000	19	0.882353
GtCCR4-3.0-EYFP	29100	19.1	0.882353
GtCCR4-3.0-EYFP	29200	19.2	1.17647
GtCCR4-3.0-EYFP	29300	19.3	0.882353
GtCCR4-3.0-EYFP	29400	19.4	1.17647
GtCCR4-3.0-EYFP	29500	19.5	1.17647
GtCCR4-3.0-EYFP	29600	19.6	0.882353
GtCCR4-3.0-EYFP	29700	19.7	1.17647
GtCCR4-3.0-EYFP	29800	19.8	1.17647
GtCCR4-3.0-EYFP	29900	19.9	0.882353
GtCCR4-3.0-EYFP	500	-9.5	0.857143
GtCCR4-3.0-EYFP	600	-9.4	0.571429
GtCCR4-3.0-EYFP	700	-9.3	0.857143
GtCCR4-3.0-EYFP	800	-9.2	0.857143
GtCCR4-3.0-EYFP	900	-9.1	1.14286
GtCCR4-3.0-EYFP	1000	-9	1.14286
GtCCR4-3.0-EYFP	1100	-8.9	0.857143
GtCCR4-3.0-EYFP	1200	-8.8	1.14286
GtCCR4-3.0-EYFP	1300	-8.7	1.14286
GtCCR4-3.0-EYFP	1400	-8.6	0.857143
GtCCR4-3.0-EYFP	1500	-8.5	1.14286
GtCCR4-3.0-EYFP	1600	-8.4	1.14286
GtCCR4-3.0-EYFP	1700	-8.3	0.857143
GtCCR4-3.0-EYFP	1800	-8.2	1.14286
GtCCR4-3.0-EYFP	1900	-8.1	0.857143
GtCCR4-3.0-EYFP	2000	-8	0.857143
GtCCR4-3.0-EYFP	2100	-7.9	1.14286
GtCCR4-3.0-EYFP	2200	-7.8	0.857143
GtCCR4-3.0-EYFP	2300	-7.7	0.857143
GtCCR4-3.0-EYFP	2400	-7.6	1.14286
GtCCR4-3.0-EYFP	2500	-7.5	0.857143
GtCCR4-3.0-EYFP	2600	-7.4	0.857143
GtCCR4-3.0-EYFP	2700	-7.3	1.14286
GtCCR4-3.0-EYFP	2800	-7.2	0.857143
GtCCR4-3.0-EYFP	2900	-7.1	0.857143
GtCCR4-3.0-EYFP	3000	-7	1.14286
GtCCR4-3.0-EYFP	3100	-6.9	0.857143
GtCCR4-3.0-EYFP	3200	-6.8	1.14286
GtCCR4-3.0-EYFP	3300	-6.7	1.14286
GtCCR4-3.0-EYFP	3400	-6.6	0.857143
GtCCR4-3.0-EYFP	3500	-6.5	1.14286
GtCCR4-3.0-EYFP	3600	-6.4	1.14286
GtCCR4-3.0-EYFP	3700	-6.3	0.857143
GtCCR4-3.0-EYFP	3800	-6.2	1.14286
GtCCR4-3.0-EYFP	3900	-6.1	1.14286
GtCCR4-3.0-EYFP	4000	-6	0.857143
GtCCR4-3.0-EYFP	4100	-5.9	1.14286
GtCCR4-3.0-EYFP	4200	-5.8	0.857143
GtCCR4-3.0-EYFP	4300	-5.7	0.857143
GtCCR4-3.0-EYFP	4400	-5.6	1.14286
GtCCR4-3.0-EYFP	4500	-5.5	0.857143
GtCCR4-3.0-EYFP	4600	-5.4	0.857143
GtCCR4-3.0-EYFP	4700	-5.3	1.14286
GtCCR4-3.0-EYFP	4800	-5.2	0.857143
GtCCR4-3.0-EYFP	4900	-5.1	1.14286
GtCCR4-3.0-EYFP	5000	-5	1.14286
GtCCR4-3.0-EYFP	5100	-4.9	0.857143
GtCCR4-3.0-EYFP	5200	-4.8	1.14286
GtCCR4-3.0-EYFP	5300	-4.7	1.14286
GtCCR4-3.0-EYFP	5400	-4.6	0.857143
GtCCR4-3.0-EYFP	5500	-4.5	1.14286
GtCCR4-3.0-EYFP	5600	-4.4	1.14286
GtCCR4-3.0-EYFP	5700	-4.3	0.857143
GtCCR4-3.0-EYFP	5800	-4.2	1.14286
GtCCR4-3.0-EYFP	5900	-4.1	0.857143
GtCCR4-3.0-EYFP	6000	-4	0.857143
GtCCR4-3.0-EYFP	6100	-3.9	1.14286
GtCCR4-3.0-EYFP	6200	-3.8	0.857143
GtCCR4-3.0-EYFP	6300	-3.7	0.857143
GtCCR4-3.0-EYFP	6400	-3.6	1.14286
GtCCR4-3.0-EYFP	6500	-3.5	0.857143
GtCCR4-3.0-EYFP	6600	-3.4	0.857143
GtCCR4-3.0-EYFP	6700	-3.3	1.14286
GtCCR4-3.0-EYFP	6800	-3.2	0.857143
GtCCR4-3.0-EYFP	6900	-3.1	0.857143
GtCCR4-3.0-EYFP	7000	-3	1.14286
GtCCR4-3.0-EYFP	7100	-2.9	0.857143
GtCCR4-3.0-EYFP	7200	-2.8	0.857143
GtCCR4-3.0-EYFP	7300	-2.7	1.14286
GtCCR4-3.0-EYFP	7400	-2.6	0.857143
GtCCR4-3.0-EYFP	7500	-2.5	1.14286
GtCCR4-3.0-EYFP	7600	-2.4	1.14286
GtCCR4-3.0-EYFP	7700	-2.3	0.857143
GtCCR4-3.0-EYFP	7800	-2.2	1.14286
GtCCR4-3.0-EYFP	7900	-2.1	1.14286
GtCCR4-3.0-EYFP	8000	-2	0.857143
GtCCR4-3.0-EYFP	8100	-1.9	1.14286
GtCCR4-3.0-EYFP	8200	-1.8	1.14286
GtCCR4-3.0-EYFP	8300	-1.7	0.857143
GtCCR4-3.0-EYFP	8400	-1.6	1.14286
GtCCR4-3.0-EYFP	8500	-1.5	0.857143
GtCCR4-3.0-EYFP	8600	-1.4	0.857143
GtCCR4-3.0-EYFP	8700	-1.3	1.14286
GtCCR4-3.0-EYFP	8800	-1.2	0.857143
GtCCR4-3.0-EYFP	8900	-1.1	0.857143
GtCCR4-3.0-EYFP	9000	-1	1.14286
GtCCR4-3.0-EYFP	9100	-0.9	0.857143
GtCCR4-3.0-EYFP	9200	-0.8	0.857143
GtCCR4-3.0-EYFP	9300	-0.7	1.14286
GtCCR4-3.0-EYFP	9400	-0.6	0.857143
GtCCR4-3.0-EYFP	9500	-0.5	1.14286
GtCCR4-3.0-EYFP	9600	-0.4	1.14286
GtCCR4-3.0-EYFP	9700	-0.3	0.857143
GtCCR4-3.0-EYFP	9800	-0.2	0.857143
GtCCR4-3.0-EYFP	9900	-0.1	0.857143
GtCCR4-3.0-EYFP	10000	0	0.857143
GtCCR4-3.0-EYFP	10100	0.1	0.857143
GtCCR4-3.0-EYFP	10200	0.2	0.857143
GtCCR4-3.0-EYFP	10300	0.3	0.857143
GtCCR4-3.0-EYFP	10400	0.4	0.857143
GtCCR4-3.0-EYFP	10500	0.5	0.571429
GtCCR4-3.0-EYFP	10600	0.6	0.857143
GtCCR4-3.0-EYFP	10700	0.7	0.857143
GtCCR4-3.0-EYFP	10800	0.8	0.857143
GtCCR4-3.0-EYFP	10900	0.9	1.14286
GtCCR4-3.0-EYFP	11000	1	0.857143
GtCCR4-3.0-EYFP	11100	1.1	0.857143
GtCCR4-3.0-EYFP	11200	1.2	1.14286
GtCCR4-3.0-EYFP	11300	1.3	0.857143
GtCCR4-3.0-EYFP	11400	1.4	0.857143
GtCCR4-3.0-EYFP	11500	1.5	1.14286
GtCCR4-3.0-EYFP	11600	1.6	0.857143
GtCCR4-3.0-EYFP	11700	1.7	0.857143
GtCCR4-3.0-EYFP	11800	1.8	1.14286
GtCCR4-3.0-EYFP	11900	1.9	0.857143
GtCCR4-3.0-EYFP	12000	2	0.857143
GtCCR4-3.0-EYFP	12100	2.1	1.14286
GtCCR4-3.0-EYFP	12200	2.2	0.857143
GtCCR4-3.0-EYFP	12300	2.3	0.857143
GtCCR4-3.0-EYFP	12400	2.4	1.14286
GtCCR4-3.0-EYFP	12500	2.5	0.857143
GtCCR4-3.0-EYFP	12600	2.6	0.857143
GtCCR4-3.0-EYFP	12700	2.7	1.14286
GtCCR4-3.0-EYFP	12800	2.8	0.857143
GtCCR4-3.0-EYFP	12900	2.9	0.857143
GtCCR4-3.0-EYFP	13000	3	1.14286
GtCCR4-3.0-EYFP	13100	3.1	0.857143
GtCCR4-3.0-EYFP	13200	3.2	0.857143
GtCCR4-3.0-EYFP	13300	3.3	1.14286
GtCCR4-3.0-EYFP	13400	3.4	0.857143
GtCCR4-3.0-EYFP	13500	3.5	0.857143
GtCCR4-3.0-EYFP	13600	3.6	1.14286
GtCCR4-3.0-EYFP	13700	3.7	0.857143
GtCCR4-3.0-EYFP	13800	3.8	0.857143
GtCCR4-3.0-EYFP	13900	3.9	1.14286
GtCCR4-3.0-EYFP	14000	4	0.857143
GtCCR4-3.0-EYFP	14100	4.1	0.857143
GtCCR4-3.0-EYFP	14200	4.2	1.14286
GtCCR4-3.0-EYFP	14300	4.3	0.857143
GtCCR4-3.0-EYFP	14400	4.4	0.857143
GtCCR4-3.0-EYFP	14500	4.5	1.14286
GtCCR4-3.0-EYFP	14600	4.6	0.857143
GtCCR4-3.0-EYFP	14700	4.7	0.857143
GtCCR4-3.0-EYFP	14800	4.8	1.14286
GtCCR4-3.0-EYFP	14900	4.9	0.857143
GtCCR4-3.0-EYFP	15000	5	0.857143
GtCCR4-3.0-EYFP	15100	5.1	1.14286
GtCCR4-3.0-EYFP	15200	5.2	0.857143
GtCCR4-3.0-EYFP	15300	5.3	0.857143
GtCCR4-3.0-EYFP	15400	5.4	1.14286
GtCCR4-3.0-EYFP	15500	5.5	0.857143
GtCCR4-3.0-EYFP	15600	5.6	1.14286
GtCCR4-3.0-EYFP	15700	5.7	1.14286
GtCCR4-3.0-EYFP	15800	5.8	0.857143
GtCCR4-3.0-EYFP	15900	5.9	1.14286
GtCCR4-3.0-EYFP	16000	6	1.14286
GtCCR4-3.0-EYFP	16100	6.1	0.857143
GtCCR4-3.0-EYFP	16200	6.2	1.14286
GtCCR4-3.0-EYFP	16300	6.3	1.14286
GtCCR4-3.0-EYFP	16400	6.4	0.857143
GtCCR4-3.0-EYFP	16500	6.5	1.14286
GtCCR4-3.0-EYFP	16600	6.6	0.857143
GtCCR4-3.0-EYFP	16700	6.7	0.857143
GtCCR4-3.0-EYFP	16800	6.8	1.14286
GtCCR4-3.0-EYFP	16900	6.9	0.857143
GtCCR4-3.0-EYFP	17000	7	0.857143
GtCCR4-3.0-EYFP	17100	7.1	1.14286
GtCCR4-3.0-EYFP	17200	7.2	0.857143
GtCCR4-3.0-EYFP	17300	7.3	0.857143
GtCCR4-3.0-EYFP	17400	7.4	1.14286
GtCCR4-3.0-EYFP	17500	7.5	0.857143
GtCCR4-3.0-EYFP	17600	7.6	0.857143
GtCCR4-3.0-EYFP	17700	7.7	1.14286
GtCCR4-3.0-EYFP	17800	7.8	0.857143
GtCCR4-3.0-EYFP	17900	7.9	0.857143
GtCCR4-3.0-EYFP	18000	8	1.14286
GtCCR4-3.0-EYFP	18100	8.1	0.857143
GtCCR4-3.0-EYFP	18200	8.2	0.857143
GtCCR4-3.0-EYFP	18300	8.3	1.14286
GtCCR4-3.0-EYFP	18400	8.4	0.857143
GtCCR4-3.0-EYFP	18500	8.5	0.857143
GtCCR4-3.0-EYFP	18600	8.6	1.14286
GtCCR4-3.0-EYFP	18700	8.7	0.857143
GtCCR4-3.0-EYFP	18800	8.8	0.857143
GtCCR4-3.0-EYFP	18900	8.9	1.14286
GtCCR4-3.0-EYFP	19000	9	0.857143
GtCCR4-3.0-EYFP	19100	9.1	1.14286
GtCCR4-3.0-EYFP	19200	9.2	1.14286
GtCCR4-3.0-EYFP	19300	9.3	0.857143
GtCCR4-3.0-EYFP	19400	9.4	1.14286
GtCCR4-3.0-EYFP	19500	9.5	1.14286
GtCCR4-3.0-EYFP	19600	9.6	0.857143
GtCCR4-3.0-EYFP	19700	9.7	1.14286
GtCCR4-3.0-EYFP	19800	9.8	1.14286
GtCCR4-3.0-EYFP	19900	9.9	0.857143
GtCCR4-3.0-EYFP	20000	10	1.14286
GtCCR4-3.0-EYFP	20100	10.1	0.857143
GtCCR4-3.0-EYFP	20200	10.2	0.857143
GtCCR4-3.0-EYFP	20300	10.3	1.14286
GtCCR4-3.0-EYFP	20400	10.4	0.857143
GtCCR4-3.0-EYFP	20500	10.5	0.857143
GtCCR4-3.0-EYFP	20600	10.6	1.14286
GtCCR4-3.0-EYFP	20700	10.7	0.857143
GtCCR4-3.0-EYFP	20800	10.8	0.857143
GtCCR4-3.0-EYFP	20900	10.9	1.14286
GtCCR4-3.0-EYFP	21000	11	0.857143
GtCCR4-3.0-EYFP	21100	11.1	0.857143
GtCCR4-3.0-EYFP	21200	11.2	1.14286
GtCCR4-3.0-EYFP	21300	11.3	0.857143
GtCCR4-3.0-EYFP	21400	11.4	0.857143
GtCCR4-3.0-EYFP	21500	11.5	1.14286
GtCCR4-3.0-EYFP	21600	11.6	0.857143
GtCCR4-3.0-EYFP	21700	11.7	0.857143
GtCCR4-3.0-EYFP	21800	11.8	1.14286
GtCCR4-3.0-EYFP	21900	11.9	0.857143
GtCCR4-3.0-EYFP	22000	12	0.857143
GtCCR4-3.0-EYFP	22100	12.1	1.14286
GtCCR4-3.0-EYFP	22200	12.2	0.857143
GtCCR4-3.0-EYFP	22300	12.3	0.857143
GtCCR4-3.0-EYFP	22400	12.4	1.14286
GtCCR4-3.0-EYFP	22500	12.5	0.857143
GtCCR4-3.0-EYFP	22600	12.6	0.857143
GtCCR4-3.0-EYFP	22700	12.7	1.14286
GtCCR4-3.0-EYFP	22800	12.8	0.857143
GtCCR4-3.0-EYFP	22900	12.9	0.857143
GtCCR4-3.0-EYFP	23000	13	1.14286
GtCCR4-3.0-EYFP	23100	13.1	0.857143
GtCCR4-3.0-EYFP	23200	13.2	1.14286
GtCCR4-3.0-EYFP	23300	13.3	1.14286
GtCCR4-3.0-EYFP	23400	13.4	0.857143
GtCCR4-3.0-EYFP	23500	13.5	1.14286
GtCCR4-3.0-EYFP	23600	13.6	1.14286
GtCCR4-3.0-EYFP	23700	13.7	0.857143
GtCCR4-3.0-EYFP	23800	13.8	1.14286
GtCCR4-3.0-EYFP	23900	13.9	1.14286
GtCCR4-3.0-EYFP	24000	14	0.857143
GtCCR4-3.0-EYFP	24100	14.1	1.14286
GtCCR4-3.0-EYFP	24200	14.2	0.857143
GtCCR4-3.0-EYFP	24300	14.3	0.857143
GtCCR4-3.0-EYFP	24400	14.4	1.14286
GtCCR4-3.0-EYFP	24500	14.5	0.857143
GtCCR4-3.0-EYFP	24600	14.6	0.857143
GtCCR4-3.0-EYFP	24700	14.7	1.14286
GtCCR4-3.0-EYFP	24800	14.8	0.857143
GtCCR4-3.0-EYFP	24900	14.9	0.857143
GtCCR4-3.0-EYFP	25000	15	1.14286
GtCCR4-3.0-EYFP	25100	15.1	0.857143
GtCCR4-3.0-EYFP	25200	15.2	0.857143
GtCCR4-3.0-EYFP	25300	15.3	1.14286
GtCCR4-3.0-EYFP	25400	15.4	0.857143
GtCCR4-3.0-EYFP	25500	15.5	0.857143
GtCCR4-3.0-EYFP	25600	15.6	1.14286
GtCCR4-3.0-EYFP	25700	15.7	0.857143
GtCCR4-3.0-EYFP	25800	15.8	0.857143
GtCCR4-3.0-EYFP	25900	15.9	1.14286
GtCCR4-3.0-EYFP	26000	16	0.857143
GtCCR4-3.0-EYFP	26100	16.1	0.857143
GtCCR4-3.0-EYFP	26200	16.2	1.14286
GtCCR4-3.0-EYFP	26300	16.3	0.857143
GtCCR4-3.0-EYFP	26400	16.4	1.14286
GtCCR4-3.0-EYFP	26500	16.5	1.14286
GtCCR4-3.0-EYFP	26600	16.6	0.857143
GtCCR4-3.0-EYFP	26700	16.7	1.14286
GtCCR4-3.0-EYFP	26800	16.8	1.14286
GtCCR4-3.0-EYFP	26900	16.9	0.857143
GtCCR4-3.0-EYFP	27000	17	1.14286
GtCCR4-3.0-EYFP	27100	17.1	1.14286
GtCCR4-3.0-EYFP	27200	17.2	0.857143
GtCCR4-3.0-EYFP	27300	17.3	1.14286
GtCCR4-3.0-EYFP	27400	17.4	0.857143
GtCCR4-3.0-EYFP	27500	17.5	0.857143
GtCCR4-3.0-EYFP	27600	17.6	1.14286
GtCCR4-3.0-EYFP	27700	17.7	0.857143
GtCCR4-3.0-EYFP	27800	17.8	0.857143
GtCCR4-3.0-EYFP	27900	17.9	1.14286
GtCCR4-3.0-EYFP	28000	18	0.857143
GtCCR4-3.0-EYFP	28100	18.1	0.857143
GtCCR4-3.0-EYFP	28200	18.2	1.14286
GtCCR4-3.0-EYFP	28300	18.3	0.857143
GtCCR4-3.0-EYFP	28400	18.4	0.857143
GtCCR4-3.0-EYFP	28500	18.5	1.14286
GtCCR4-3.0-EYFP	28600	18.6	0.857143
GtCCR4-3.0-EYFP	28700	18.7	0.857143
GtCCR4-3.0-EYFP	28800	18.8	1.14286
GtCCR4-3.0-EYFP	28900	18.9	0.857143
GtCCR4-3.0-EYFP	29000	19	0.857143
GtCCR4-3.0-EYFP	29100	19.1	1.14286
GtCCR4-3.0-EYFP	29200	19.2	0.857143
GtCCR4-3.0-EYFP	29300	19.3	0.857143
GtCCR4-3.0-EYFP	29400	19.4	1.14286
GtCCR4-3.0-EYFP	29500	19.5	0.857143
GtCCR4-3.0-EYFP	29600	19.6	0.857143
GtCCR4-3.0-EYFP	29700	19.7	0.857143
GtCCR4-3.0-EYFP	29800	19.8	0.857143
GtCCR4-3.0-EYFP	29900	19.9	0.857143
GtCCR4-3.0-EYFP	500	-9.5	1.14286
GtCCR4-3.0-EYFP	600	-9.4	1.14286
GtCCR4-3.0-EYFP	700	-9.3	0.857143
GtCCR4-3.0-EYFP	800	-9.2	1.14286
GtCCR4-3.0-EYFP	900	-9.1	1.14286
GtCCR4-3.0-EYFP	1000	-9	0.857143
GtCCR4-3.0-EYFP	1100	-8.9	1.14286
GtCCR4-3.0-EYFP	1200	-8.8	1.14286
GtCCR4-3.0-EYFP	1300	-8.7	0.857143
GtCCR4-3.0-EYFP	1400	-8.6	1.14286
GtCCR4-3.0-EYFP	1500	-8.5	0.857143
GtCCR4-3.0-EYFP	1600	-8.4	0.857143
GtCCR4-3.0-EYFP	1700	-8.3	1.14286
GtCCR4-3.0-EYFP	1800	-8.2	0.857143
GtCCR4-3.0-EYFP	1900	-8.1	0.857143
GtCCR4-3.0-EYFP	2000	-8	1.14286
GtCCR4-3.0-EYFP	2100	-7.9	0.857143
GtCCR4-3.0-EYFP	2200	-7.8	0.857143
GtCCR4-3.0-EYFP	2300	-7.7	1.14286
GtCCR4-3.0-EYFP	2400	-7.6	0.857143
GtCCR4-3.0-EYFP	2500	-7.5	1.14286
GtCCR4-3.0-EYFP	2600	-7.4	1.14286
GtCCR4-3.0-EYFP	2700	-7.3	0.857143
GtCCR4-3.0-EYFP	2800	-7.2	1.14286
GtCCR4-3.0-EYFP	2900	-7.1	1.14286
GtCCR4-3.0-EYFP	3000	-7	0.857143
GtCCR4-3.0-EYFP	3100	-6.9	1.14286
GtCCR4-3.0-EYFP	3200	-6.8	1.14286
GtCCR4-3.0-EYFP	3300	-6.7	0.857143
GtCCR4-3.0-EYFP	3400	-6.6	1.14286
GtCCR4-3.0-EYFP	3500	-6.5	0.857143
GtCCR4-3.0-EYFP	3600	-6.4	0.857143
GtCCR4-3.0-EYFP	3700	-6.3	1.14286
GtCCR4-3.0-EYFP	3800	-6.2	0.857143
GtCCR4-3.0-EYFP	3900	-6.1	0.857143
GtCCR4-3.0-EYFP	4000	-6	1.14286
GtCCR4-3.0-EYFP	4100	-5.9	0.857143
GtCCR4-3.0-EYFP	4200	-5.8	0.857143
GtCCR4-3.0-EYFP	4300	-5.7	1.14286
GtCCR4-3.0-EYFP	4400	-5.6	0.857143
GtCCR4-3.0-EYFP	4500	-5.5	0.857143
GtCCR4-3.0-EYFP	4600	-5.4	1.14286
GtCCR4-3.0-EYFP	4700	-5.3	0.857143
GtCCR4-3.0-EYFP	4800	-5.2	1.14286
GtCCR4-3.0-EYFP	4900	-5.1	1.14286
GtCCR4-3.0-EYFP	5000	-5	0.857143
GtCCR4-3.0-EYFP	5100	-4.9	1.14286
GtCCR4-3.0-EYFP	5200	-4.8	1.14286
GtCCR4-3.0-EYFP	5300	-4.7	0.857143
GtCCR4-3.0-EYFP	5400	-4.6	1.14286
GtCCR4-3.0-EYFP	5500	-4.5	1.14286
GtCCR4-3.0-EYFP	5600	-4.4	0.857143
GtCCR4-3.0-EYFP	5700	-4.3	1.14286
GtCCR4-3.0-EYFP	5800	-4.2	0.857143
GtCCR4-3.0-EYFP	5900	-4.1	0.857143
GtCCR4-3.0-EYFP	6000	-4	1.14286
GtCCR4-3.0-EYFP	6100	-3.9	0.857143
GtCCR4-3.0-EYFP	6200	-3.8	0.857143
GtCCR4-3.0-EYFP	6300	-3.7	1.14286
GtCCR4-3.0-EYFP	6400	-3.6	0.857143
GtCCR4-3.0-EYFP	6500	-3.5	0.857143
GtCCR4-3.0-EYFP	6600	-3.4	1.14286
GtCCR4-3.0-EYFP	6700	-3.3	0.857143
GtCCR4-3.0-EYFP	6800	-3.2	0.857143
GtCCR4-3.0-EYFP	6900	-3.1	1.14286
GtCCR4-3.0-EYFP	7000	-3	0.857143
GtCCR4-3.0-EYFP	7100	-2.9	1.14286
GtCCR4-3.0-EYFP	7200	-2.8	1.14286
GtCCR4-3.0-EYFP	7300	-2.7	0.857143
GtCCR4-3.0-EYFP	7400	-2.6	1.14286
GtCCR4-3.0-EYFP	7500	-2.5	1.14286
GtCCR4-3.0-EYFP	7600	-2.4	0.857143
GtCCR4-3.0-EYFP	7700	-2.3	1.14286
GtCCR4-3.0-EYFP	7800	-2.2	1.14286
GtCCR4-3.0-EYFP	7900	-2.1	0.857143
GtCCR4-3.0-EYFP	8000	-2	1.14286
GtCCR4-3.0-EYFP	8100	-1.9	0.857143
GtCCR4-3.0-EYFP	8200	-1.8	0.857143
GtCCR4-3.0-EYFP	8300	-1.7	1.14286
GtCCR4-3.0-EYFP	8400	-1.6	0.857143
GtCCR4-3.0-EYFP	8500	-1.5	0.857143
GtCCR4-3.0-EYFP	8600	-1.4	1.14286
GtCCR4-3.0-EYFP	8700	-1.3	0.857143
GtCCR4-3.0-EYFP	8800	-1.2	0.857143
GtCCR4-3.0-EYFP	8900	-1.1	1.14286
GtCCR4-3.0-EYFP	9000	-1	0.857143
GtCCR4-3.0-EYFP	9100	-0.9	0.857143
GtCCR4-3.0-EYFP	9200	-0.8	1.14286
GtCCR4-3.0-EYFP	9300	-0.7	0.857143
GtCCR4-3.0-EYFP	9400	-0.6	1.14286
GtCCR4-3.0-EYFP	9500	-0.5	1.14286
GtCCR4-3.0-EYFP	9600	-0.4	0.857143
GtCCR4-3.0-EYFP	9700	-0.3	0.857143
GtCCR4-3.0-EYFP	9800	-0.2	0.857143
GtCCR4-3.0-EYFP	9900	-0.1	0.571429
GtCCR4-3.0-EYFP	10000	0	0.571429
GtCCR4-3.0-EYFP	10100	0.1	0.857143
GtCCR4-3.0-EYFP	10200	0.2	0.571429
GtCCR4-3.0-EYFP	10300	0.3	0.571429
GtCCR4-3.0-EYFP	10400	0.4	0.571429
GtCCR4-3.0-EYFP	10500	0.5	0.571429
GtCCR4-3.0-EYFP	10600	0.6	0.571429
GtCCR4-3.0-EYFP	10700	0.7	0.857143
GtCCR4-3.0-EYFP	10800	0.8	0.857143
GtCCR4-3.0-EYFP	10900	0.9	0.857143
GtCCR4-3.0-EYFP	11000	1	1.14286
GtCCR4-3.0-EYFP	11100	1.1	0.857143
GtCCR4-3.0-EYFP	11200	1.2	1.14286
GtCCR4-3.0-EYFP	11300	1.3	1.14286
GtCCR4-3.0-EYFP	11400	1.4	0.857143
GtCCR4-3.0-EYFP	11500	1.5	1.14286
GtCCR4-3.0-EYFP	11600	1.6	1.14286
GtCCR4-3.0-EYFP	11700	1.7	0.857143
GtCCR4-3.0-EYFP	11800	1.8	1.14286
GtCCR4-3.0-EYFP	11900	1.9	1.14286
GtCCR4-3.0-EYFP	12000	2	0.857143
GtCCR4-3.0-EYFP	12100	2.1	1.14286
GtCCR4-3.0-EYFP	12200	2.2	0.857143
GtCCR4-3.0-EYFP	12300	2.3	0.857143
GtCCR4-3.0-EYFP	12400	2.4	1.14286
GtCCR4-3.0-EYFP	12500	2.5	0.857143
GtCCR4-3.0-EYFP	12600	2.6	0.857143
GtCCR4-3.0-EYFP	12700	2.7	1.14286
GtCCR4-3.0-EYFP	12800	2.8	0.857143
GtCCR4-3.0-EYFP	12900	2.9	0.857143
GtCCR4-3.0-EYFP	13000	3	1.14286
GtCCR4-3.0-EYFP	13100	3.1	0.857143
GtCCR4-3.0-EYFP	13200	3.2	0.857143
GtCCR4-3.0-EYFP	13300	3.3	1.14286
GtCCR4-3.0-EYFP	13400	3.4	0.857143
GtCCR4-3.0-EYFP	13500	3.5	0.857143
GtCCR4-3.0-EYFP	13600	3.6	1.14286
GtCCR4-3.0-EYFP	13700	3.7	0.857143
GtCCR4-3.0-EYFP	13800	3.8	0.857143
GtCCR4-3.0-EYFP	13900	3.9	1.14286
GtCCR4-3.0-EYFP	14000	4	0.857143
GtCCR4-3.0-EYFP	14100	4.1	0.857143
GtCCR4-3.0-EYFP	14200	4.2	1.14286
GtCCR4-3.0-EYFP	14300	4.3	0.857143
GtCCR4-3.0-EYFP	14400	4.4	0.857143
GtCCR4-3.0-EYFP	14500	4.5	1.14286
GtCCR4-3.0-EYFP	14600	4.6	0.857143
GtCCR4-3.0-EYFP	14700	4.7	0.857143
GtCCR4-3.0-EYFP	14800	4.8	1.14286
GtCCR4-3.0-EYFP	14900	4.9	0.857143
GtCCR4-3.0-EYFP	15000	5	0.857143
GtCCR4-3.0-EYFP	15100	5.1	1.14286
GtCCR4-3.0-EYFP	15200	5.2	0.857143
GtCCR4-3.0-EYFP	15300	5.3	0.857143
GtCCR4-3.0-EYFP	15400	5.4	1.14286
GtCCR4-3.0-EYFP	15500	5.5	0.857143
GtCCR4-3.0-EYFP	15600	5.6	1.14286
GtCCR4-3.0-EYFP	15700	5.7	1.14286
GtCCR4-3.0-EYFP	15800	5.8	0.857143
GtCCR4-3.0-EYFP	15900	5.9	1.14286
GtCCR4-3.0-EYFP	16000	6	1.14286
GtCCR4-3.0-EYFP	16100	6.1	0.857143
GtCCR4-3.0-EYFP	16200	6.2	1.14286
GtCCR4-3.0-EYFP	16300	6.3	1.14286
GtCCR4-3.0-EYFP	16400	6.4	0.857143
GtCCR4-3.0-EYFP	16500	6.5	1.14286
GtCCR4-3.0-EYFP	16600	6.6	0.857143
GtCCR4-3.0-EYFP	16700	6.7	0.857143
GtCCR4-3.0-EYFP	16800	6.8	1.14286
GtCCR4-3.0-EYFP	16900	6.9	0.857143
GtCCR4-3.0-EYFP	17000	7	0.857143
GtCCR4-3.0-EYFP	17100	7.1	1.14286
GtCCR4-3.0-EYFP	17200	7.2	0.857143
GtCCR4-3.0-EYFP	17300	7.3	0.857143
GtCCR4-3.0-EYFP	17400	7.4	1.14286
GtCCR4-3.0-EYFP	17500	7.5	0.857143
GtCCR4-3.0-EYFP	17600	7.6	0.857143
GtCCR4-3.0-EYFP	17700	7.7	1.14286
GtCCR4-3.0-EYFP	17800	7.8	0.857143
GtCCR4-3.0-EYFP	17900	7.9	1.14286
GtCCR4-3.0-EYFP	18000	8	1.14286
GtCCR4-3.0-EYFP	18100	8.1	0.857143
GtCCR4-3.0-EYFP	18200	8.2	1.14286
GtCCR4-3.0-EYFP	18300	8.3	1.14286
GtCCR4-3.0-EYFP	18400	8.4	0.857143
GtCCR4-3.0-EYFP	18500	8.5	1.14286
GtCCR4-3.0-EYFP	18600	8.6	1.14286
GtCCR4-3.0-EYFP	18700	8.7	0.857143
GtCCR4-3.0-EYFP	18800	8.8	1.14286
GtCCR4-3.0-EYFP	18900	8.9	0.857143
GtCCR4-3.0-EYFP	19000	9	0.857143
GtCCR4-3.0-EYFP	19100	9.1	1.14286
GtCCR4-3.0-EYFP	19200	9.2	0.857143
GtCCR4-3.0-EYFP	19300	9.3	0.857143
GtCCR4-3.0-EYFP	19400	9.4	1.14286
GtCCR4-3.0-EYFP	19500	9.5	0.857143
GtCCR4-3.0-EYFP	19600	9.6	0.857143
GtCCR4-3.0-EYFP	19700	9.7	1.14286
GtCCR4-3.0-EYFP	19800	9.8	0.857143
GtCCR4-3.0-EYFP	19900	9.9	0.857143
GtCCR4-3.0-EYFP	20000	10	1.14286
GtCCR4-3.0-EYFP	20100	10.1	0.857143
GtCCR4-3.0-EYFP	20200	10.2	0.857143
GtCCR4-3.0-EYFP	20300	10.3	1.14286
GtCCR4-3.0-EYFP	20400	10.4	0.857143
GtCCR4-3.0-EYFP	20500	10.5	0.857143
GtCCR4-3.0-EYFP	20600	10.6	1.14286
GtCCR4-3.0-EYFP	20700	10.7	0.857143
GtCCR4-3.0-EYFP	20800	10.8	0.857143
GtCCR4-3.0-EYFP	20900	10.9	1.14286
GtCCR4-3.0-EYFP	21000	11	0.857143
GtCCR4-3.0-EYFP	21100	11.1	1.14286
GtCCR4-3.0-EYFP	21200	11.2	1.14286
GtCCR4-3.0-EYFP	21300	11.3	0.857143
GtCCR4-3.0-EYFP	21400	11.4	1.14286
GtCCR4-3.0-EYFP	21500	11.5	1.14286
GtCCR4-3.0-EYFP	21600	11.6	0.857143
GtCCR4-3.0-EYFP	21700	11.7	1.14286
GtCCR4-3.0-EYFP	21800	11.8	1.14286
GtCCR4-3.0-EYFP	21900	11.9	0.857143
GtCCR4-3.0-EYFP	22000	12	1.14286
GtCCR4-3.0-EYFP	22100	12.1	0.857143
GtCCR4-3.0-EYFP	22200	12.2	0.857143
GtCCR4-3.0-EYFP	22300	12.3	1.14286
GtCCR4-3.0-EYFP	22400	12.4	0.857143
GtCCR4-3.0-EYFP	22500	12.5	0.857143
GtCCR4-3.0-EYFP	22600	12.6	1.14286
GtCCR4-3.0-EYFP	22700	12.7	0.857143
GtCCR4-3.0-EYFP	22800	12.8	0.857143
GtCCR4-3.0-EYFP	22900	12.9	1.14286
GtCCR4-3.0-EYFP	23000	13	0.857143
GtCCR4-3.0-EYFP	23100	13.1	0.857143
GtCCR4-3.0-EYFP	23200	13.2	1.14286
GtCCR4-3.0-EYFP	23300	13.3	0.857143
GtCCR4-3.0-EYFP	23400	13.4	1.14286
GtCCR4-3.0-EYFP	23500	13.5	1.14286
GtCCR4-3.0-EYFP	23600	13.6	0.857143
GtCCR4-3.0-EYFP	23700	13.7	1.14286
GtCCR4-3.0-EYFP	23800	13.8	1.14286
GtCCR4-3.0-EYFP	23900	13.9	0.857143
GtCCR4-3.0-EYFP	24000	14	1.14286
GtCCR4-3.0-EYFP	24100	14.1	1.14286
GtCCR4-3.0-EYFP	24200	14.2	0.857143
GtCCR4-3.0-EYFP	24300	14.3	1.14286
GtCCR4-3.0-EYFP	24400	14.4	0.857143
GtCCR4-3.0-EYFP	24500	14.5	0.857143
GtCCR4-3.0-EYFP	24600	14.6	1.14286
GtCCR4-3.0-EYFP	24700	14.7	0.857143
GtCCR4-3.0-EYFP	24800	14.8	0.857143
GtCCR4-3.0-EYFP	24900	14.9	1.14286
GtCCR4-3.0-EYFP	25000	15	0.857143
GtCCR4-3.0-EYFP	25100	15.1	0.857143
GtCCR4-3.0-EYFP	25200	15.2	1.14286
GtCCR4-3.0-EYFP	25300	15.3	0.857143
GtCCR4-3.0-EYFP	25400	15.4	1.14286
GtCCR4-3.0-EYFP	25500	15.5	1.14286
GtCCR4-3.0-EYFP	25600	15.6	0.857143
GtCCR4-3.0-EYFP	25700	15.7	1.14286
GtCCR4-3.0-EYFP	25800	15.8	1.14286
GtCCR4-3.0-EYFP	25900	15.9	0.857143
GtCCR4-3.0-EYFP	26000	16	1.14286
GtCCR4-3.0-EYFP	26100	16.1	1.14286
GtCCR4-3.0-EYFP	26200	16.2	0.857143
GtCCR4-3.0-EYFP	26300	16.3	1.14286
GtCCR4-3.0-EYFP	26400	16.4	0.857143
GtCCR4-3.0-EYFP	26500	16.5	0.857143
GtCCR4-3.0-EYFP	26600	16.6	1.14286
GtCCR4-3.0-EYFP	26700	16.7	0.857143
GtCCR4-3.0-EYFP	26800	16.8	0.857143
GtCCR4-3.0-EYFP	26900	16.9	1.14286
GtCCR4-3.0-EYFP	27000	17	0.857143
GtCCR4-3.0-EYFP	27100	17.1	1.14286
GtCCR4-3.0-EYFP	27200	17.2	1.14286
GtCCR4-3.0-EYFP	27300	17.3	0.857143
GtCCR4-3.0-EYFP	27400	17.4	1.14286
GtCCR4-3.0-EYFP	27500	17.5	1.14286
GtCCR4-3.0-EYFP	27600	17.6	0.857143
GtCCR4-3.0-EYFP	27700	17.7	1.14286
GtCCR4-3.0-EYFP	27800	17.8	1.14286
GtCCR4-3.0-EYFP	27900	17.9	0.857143
GtCCR4-3.0-EYFP	28000	18	1.14286
GtCCR4-3.0-EYFP	28100	18.1	0.857143
GtCCR4-3.0-EYFP	28200	18.2	0.857143
GtCCR4-3.0-EYFP	28300	18.3	1.14286
GtCCR4-3.0-EYFP	28400	18.4	0.857143
GtCCR4-3.0-EYFP	28500	18.5	0.857143
GtCCR4-3.0-EYFP	28600	18.6	1.14286
GtCCR4-3.0-EYFP	28700	18.7	0.857143
GtCCR4-3.0-EYFP	28800	18.8	1.14286
GtCCR4-3.0-EYFP	28900	18.9	1.14286
GtCCR4-3.0-EYFP	29000	19	0.857143
GtCCR4-3.0-EYFP	29100	19.1	1.14286
GtCCR4-3.0-EYFP	29200	19.2	1.14286
GtCCR4-3.0-EYFP	29300	19.3	0.857143
GtCCR4-3.0-EYFP	29400	19.4	1.14286
GtCCR4-3.0-EYFP	29500	19.5	1.14286
GtCCR4-3.0-EYFP	29600	19.6	0.857143
GtCCR4-3.0-EYFP	29700	19.7	1.14286
GtCCR4-3.0-EYFP	29800	19.8	0.857143
GtCCR4-3.0-EYFP	29900	19.9	1.14286
GtCCR4-3.0-EYFP	500	-9.5	1.11111
GtCCR4-3.0-EYFP	600	-9.4	0.833333
GtCCR4-3.0-EYFP	700	-9.3	1.11111
GtCCR4-3.0-EYFP	800	-9.2	1.11111
GtCCR4-3.0-EYFP	900	-9.1	0.833333
GtCCR4-3.0-EYFP	1000	-9	1.11111
GtCCR4-3.0-EYFP	1100	-8.9	0.833333
GtCCR4-3.0-EYFP	1200	-8.8	0.833333
GtCCR4-3.0-EYFP	1300	-8.7	1.11111
GtCCR4-3.0-EYFP	1400	-8.6	0.833333
GtCCR4-3.0-EYFP	1500	-8.5	0.833333
GtCCR4-3.0-EYFP	1600	-8.4	1.11111
GtCCR4-3.0-EYFP	1700	-8.3	0.833333
GtCCR4-3.0-EYFP	1800	-8.2	1.11111
GtCCR4-3.0-EYFP	1900	-8.1	1.11111
GtCCR4-3.0-EYFP	2000	-8	0.833333
GtCCR4-3.0-EYFP	2100	-7.9	1.11111
GtCCR4-3.0-EYFP	2200	-7.8	1.11111
GtCCR4-3.0-EYFP	2300	-7.7	0.833333
GtCCR4-3.0-EYFP	2400	-7.6	1.11111
GtCCR4-3.0-EYFP	2500	-7.5	1.11111
GtCCR4-3.0-EYFP	2600	-7.4	0.833333
GtCCR4-3.0-EYFP	2700	-7.3	1.11111
GtCCR4-3.0-EYFP	2800	-7.2	0.833333
GtCCR4-3.0-EYFP	2900	-7.1	0.833333
GtCCR4-3.0-EYFP	3000	-7	1.11111
GtCCR4-3.0-EYFP	3100	-6.9	0.833333
GtCCR4-3.0-EYFP	3200	-6.8	0.833333
GtCCR4-3.0-EYFP	3300	-6.7	1.11111
GtCCR4-3.0-EYFP	3400	-6.6	0.833333
GtCCR4-3.0-EYFP	3500	-6.5	0.833333
GtCCR4-3.0-EYFP	3600	-6.4	1.11111
GtCCR4-3.0-EYFP	3700	-6.3	0.833333
GtCCR4-3.0-EYFP	3800	-6.2	1.11111
GtCCR4-3.0-EYFP	3900	-6.1	1.11111
GtCCR4-3.0-EYFP	4000	-6	0.833333
GtCCR4-3.0-EYFP	4100	-5.9	1.11111
GtCCR4-3.0-EYFP	4200	-5.8	1.11111
GtCCR4-3.0-EYFP	4300	-5.7	0.833333
GtCCR4-3.0-EYFP	4400	-5.6	1.11111
GtCCR4-3.0-EYFP	4500	-5.5	1.11111
GtCCR4-3.0-EYFP	4600	-5.4	0.833333
GtCCR4-3.0-EYFP	4700	-5.3	1.11111
GtCCR4-3.0-EYFP	4800	-5.2	0.833333
GtCCR4-3.0-EYFP	4900	-5.1	0.833333
GtCCR4-3.0-EYFP	5000	-5	1.11111
GtCCR4-3.0-EYFP	5100	-4.9	0.833333
GtCCR4-3.0-EYFP	5200	-4.8	1.11111
GtCCR4-3.0-EYFP	5300	-4.7	1.11111
GtCCR4-3.0-EYFP	5400	-4.6	0.833333
GtCCR4-3.0-EYFP	5500	-4.5	1.11111
GtCCR4-3.0-EYFP	5600	-4.4	1.11111
GtCCR4-3.0-EYFP	5700	-4.3	0.833333
GtCCR4-3.0-EYFP	5800	-4.2	1.11111
GtCCR4-3.0-EYFP	5900	-4.1	1.11111
GtCCR4-3.0-EYFP	6000	-4	0.833333
GtCCR4-3.0-EYFP	6100	-3.9	1.11111
GtCCR4-3.0-EYFP	6200	-3.8	0.833333
GtCCR4-3.0-EYFP	6300	-3.7	0.833333
GtCCR4-3.0-EYFP	6400	-3.6	1.11111
GtCCR4-3.0-EYFP	6500	-3.5	0.833333
GtCCR4-3.0-EYFP	6600	-3.4	0.833333
GtCCR4-3.0-EYFP	6700	-3.3	1.11111
GtCCR4-3.0-EYFP	6800	-3.2	0.833333
GtCCR4-3.0-EYFP	6900	-3.1	0.833333
GtCCR4-3.0-EYFP	7000	-3	1.11111
GtCCR4-3.0-EYFP	7100	-2.9	0.833333
GtCCR4-3.0-EYFP	7200	-2.8	1.11111
GtCCR4-3.0-EYFP	7300	-2.7	1.11111
GtCCR4-3.0-EYFP	7400	-2.6	0.833333
GtCCR4-3.0-EYFP	7500	-2.5	1.11111
GtCCR4-3.0-EYFP	7600	-2.4	1.11111
GtCCR4-3.0-EYFP	7700	-2.3	0.833333
GtCCR4-3.0-EYFP	7800	-2.2	1.11111
GtCCR4-3.0-EYFP	7900	-2.1	1.11111
GtCCR4-3.0-EYFP	8000	-2	0.833333
GtCCR4-3.0-EYFP	8100	-1.9	1.11111
GtCCR4-3.0-EYFP	8200	-1.8	0.833333
GtCCR4-3.0-EYFP	8300	-1.7	0.833333
GtCCR4-3.0-EYFP	8400	-1.6	1.11111
GtCCR4-3.0-EYFP	8500	-1.5	0.833333
GtCCR4-3.0-EYFP	8600	-1.4	0.833333
GtCCR4-3.0-EYFP	8700	-1.3	1.11111
GtCCR4-3.0-EYFP	8800	-1.2	0.833333
GtCCR4-3.0-EYFP	8900	-1.1	1.11111
GtCCR4-3.0-EYFP	9000	-1	1.11111
GtCCR4-3.0-EYFP	9100	-0.9	0.833333
GtCCR4-3.0-EYFP	9200	-0.8	1.11111
GtCCR4-3.0-EYFP	9300	-0.7	1.11111
GtCCR4-3.0-EYFP	9400	-0.6	0.833333
GtCCR4-3.0-EYFP	9500	-0.5	1.11111
GtCCR4-3.0-EYFP	9600	-0.4	1.11111
GtCCR4-3.0-EYFP	9700	-0.3	0.833333
GtCCR4-3.0-EYFP	9800	-0.2	0.833333
GtCCR4-3.0-EYFP	9900	-0.1	0.555556
GtCCR4-3.0-EYFP	10000	0	0.833333
GtCCR4-3.0-EYFP	10100	0.1	0.833333
GtCCR4-3.0-EYFP	10200	0.2	0.555556
GtCCR4-3.0-EYFP	10300	0.3	0.833333
GtCCR4-3.0-EYFP	10400	0.4	0.833333
GtCCR4-3.0-EYFP	10500	0.5	0.555556
GtCCR4-3.0-EYFP	10600	0.6	0.833333
GtCCR4-3.0-EYFP	10700	0.7	0.833333
GtCCR4-3.0-EYFP	10800	0.8	0.833333
GtCCR4-3.0-EYFP	10900	0.9	1.11111
GtCCR4-3.0-EYFP	11000	1	0.833333
GtCCR4-3.0-EYFP	11100	1.1	0.833333
GtCCR4-3.0-EYFP	11200	1.2	1.11111
GtCCR4-3.0-EYFP	11300	1.3	0.833333
GtCCR4-3.0-EYFP	11400	1.4	0.833333
GtCCR4-3.0-EYFP	11500	1.5	1.11111
GtCCR4-3.0-EYFP	11600	1.6	0.833333
GtCCR4-3.0-EYFP	11700	1.7	1.11111
GtCCR4-3.0-EYFP	11800	1.8	1.11111
GtCCR4-3.0-EYFP	11900	1.9	0.833333
GtCCR4-3.0-EYFP	12000	2	1.11111
GtCCR4-3.0-EYFP	12100	2.1	1.11111
GtCCR4-3.0-EYFP	12200	2.2	0.833333
GtCCR4-3.0-EYFP	12300	2.3	1.11111
GtCCR4-3.0-EYFP	12400	2.4	1.11111
GtCCR4-3.0-EYFP	12500	2.5	0.833333
GtCCR4-3.0-EYFP	12600	2.6	1.11111
GtCCR4-3.0-EYFP	12700	2.7	0.833333
GtCCR4-3.0-EYFP	12800	2.8	0.833333
GtCCR4-3.0-EYFP	12900	2.9	1.11111
GtCCR4-3.0-EYFP	13000	3	0.833333
GtCCR4-3.0-EYFP	13100	3.1	0.833333
GtCCR4-3.0-EYFP	13200	3.2	1.11111
GtCCR4-3.0-EYFP	13300	3.3	0.833333
GtCCR4-3.0-EYFP	13400	3.4	1.11111
GtCCR4-3.0-EYFP	13500	3.5	1.11111
GtCCR4-3.0-EYFP	13600	3.6	0.833333
GtCCR4-3.0-EYFP	13700	3.7	1.11111
GtCCR4-3.0-EYFP	13800	3.8	1.11111
GtCCR4-3.0-EYFP	13900	3.9	0.833333
GtCCR4-3.0-EYFP	14000	4	1.11111
GtCCR4-3.0-EYFP	14100	4.1	1.11111
GtCCR4-3.0-EYFP	14200	4.2	0.833333
GtCCR4-3.0-EYFP	14300	4.3	1.11111
GtCCR4-3.0-EYFP	14400	4.4	0.833333
GtCCR4-3.0-EYFP	14500	4.5	0.833333
GtCCR4-3.0-EYFP	14600	4.6	1.11111
GtCCR4-3.0-EYFP	14700	4.7	0.833333
GtCCR4-3.0-EYFP	14800	4.8	0.833333
GtCCR4-3.0-EYFP	14900	4.9	1.11111
GtCCR4-3.0-EYFP	15000	5	0.833333
GtCCR4-3.0-EYFP	15100	5.1	0.833333
GtCCR4-3.0-EYFP	15200	5.2	1.11111
GtCCR4-3.0-EYFP	15300	5.3	0.833333
GtCCR4-3.0-EYFP	15400	5.4	1.11111
GtCCR4-3.0-EYFP	15500	5.5	1.11111
GtCCR4-3.0-EYFP	15600	5.6	0.833333
GtCCR4-3.0-EYFP	15700	5.7	1.11111
GtCCR4-3.0-EYFP	15800	5.8	1.11111
GtCCR4-3.0-EYFP	15900	5.9	0.833333
GtCCR4-3.0-EYFP	16000	6	1.11111
GtCCR4-3.0-EYFP	16100	6.1	1.11111
GtCCR4-3.0-EYFP	16200	6.2	0.833333
GtCCR4-3.0-EYFP	16300	6.3	1.11111
GtCCR4-3.0-EYFP	16400	6.4	0.833333
GtCCR4-3.0-EYFP	16500	6.5	0.833333
GtCCR4-3.0-EYFP	16600	6.6	1.11111
GtCCR4-3.0-EYFP	16700	6.7	0.833333
GtCCR4-3.0-EYFP	16800	6.8	0.833333
GtCCR4-3.0-EYFP	16900	6.9	1.11111
GtCCR4-3.0-EYFP	17000	7	0.833333
GtCCR4-3.0-EYFP	17100	7.1	0.833333
GtCCR4-3.0-EYFP	17200	7.2	1.11111
GtCCR4-3.0-EYFP	17300	7.3	0.833333
GtCCR4-3.0-EYFP	17400	7.4	0.833333
GtCCR4-3.0-EYFP	17500	7.5	1.11111
GtCCR4-3.0-EYFP	17600	7.6	0.833333
GtCCR4-3.0-EYFP	17700	7.7	1.11111
GtCCR4-3.0-EYFP	17800	7.8	1.11111
GtCCR4-3.0-EYFP	17900	7.9	0.833333
GtCCR4-3.0-EYFP	18000	8	1.11111
GtCCR4-3.0-EYFP	18100	8.1	1.11111
GtCCR4-3.0-EYFP	18200	8.2	0.833333
GtCCR4-3.0-EYFP	18300	8.3	1.11111
GtCCR4-3.0-EYFP	18400	8.4	1.11111
GtCCR4-3.0-EYFP	18500	8.5	0.833333
GtCCR4-3.0-EYFP	18600	8.6	1.11111
GtCCR4-3.0-EYFP	18700	8.7	0.833333
GtCCR4-3.0-EYFP	18800	8.8	0.833333
GtCCR4-3.0-EYFP	18900	8.9	1.11111
GtCCR4-3.0-EYFP	19000	9	0.833333
GtCCR4-3.0-EYFP	19100	9.1	0.833333
GtCCR4-3.0-EYFP	19200	9.2	1.11111
GtCCR4-3.0-EYFP	19300	9.3	0.833333
GtCCR4-3.0-EYFP	19400	9.4	1.11111
GtCCR4-3.0-EYFP	19500	9.5	1.11111
GtCCR4-3.0-EYFP	19600	9.6	0.833333
GtCCR4-3.0-EYFP	19700	9.7	1.11111
GtCCR4-3.0-EYFP	19800	9.8	1.11111
GtCCR4-3.0-EYFP	19900	9.9	0.833333
GtCCR4-3.0-EYFP	20000	10	1.11111
GtCCR4-3.0-EYFP	20100	10.1	1.11111
GtCCR4-3.0-EYFP	20200	10.2	0.833333
GtCCR4-3.0-EYFP	20300	10.3	1.11111
GtCCR4-3.0-EYFP	20400	10.4	0.833333
GtCCR4-3.0-EYFP	20500	10.5	0.833333
GtCCR4-3.0-EYFP	20600	10.6	1.11111
GtCCR4-3.0-EYFP	20700	10.7	0.833333
GtCCR4-3.0-EYFP	20800	10.8	0.833333
GtCCR4-3.0-EYFP	20900	10.9	1.11111
GtCCR4-3.0-EYFP	21000	11	0.833333
GtCCR4-3.0-EYFP	21100	11.1	1.11111
GtCCR4-3.0-EYFP	21200	11.2	1.11111
GtCCR4-3.0-EYFP	21300	11.3	0.833333
GtCCR4-3.0-EYFP	21400	11.4	1.11111
GtCCR4-3.0-EYFP	21500	11.5	1.11111
GtCCR4-3.0-EYFP	21600	11.6	0.833333
GtCCR4-3.0-EYFP	21700	11.7	1.11111
GtCCR4-3.0-EYFP	21800	11.8	1.11111
GtCCR4-3.0-EYFP	21900	11.9	0.833333
GtCCR4-3.0-EYFP	22000	12	1.11111
GtCCR4-3.0-EYFP	22100	12.1	0.833333
GtCCR4-3.0-EYFP	22200	12.2	0.833333
GtCCR4-3.0-EYFP	22300	12.3	1.11111
GtCCR4-3.0-EYFP	22400	12.4	0.833333
GtCCR4-3.0-EYFP	22500	12.5	0.833333
GtCCR4-3.0-EYFP	22600	12.6	1.11111
GtCCR4-3.0-EYFP	22700	12.7	0.833333
GtCCR4-3.0-EYFP	22800	12.8	1.11111
GtCCR4-3.0-EYFP	22900	12.9	1.11111
GtCCR4-3.0-EYFP	23000	13	0.833333
GtCCR4-3.0-EYFP	23100	13.1	1.11111
GtCCR4-3.0-EYFP	23200	13.2	1.11111
GtCCR4-3.0-EYFP	23300	13.3	0.833333
[truncated: 25,248 more rows]
