# Supplementary material for: Optogenetic manipulation of neuronal and cardiomyocyte functions in zebrafish using microbial rhodopsins and adenylyl cyclases
Source: eLife. 2023 Aug 17;12:e83975. doi: 10.7554/eLife.83975 (PMC10435232; doi:10.7554/eLife.83975)
Supplement: Figure 5—figure supplement 2—source data 1. [file elife-83975-fig5-figsupp2-data1.xlsx]

## Sheet: A
Line	light intensity	Sample_number	Trial_number	Cardiac arrest
ChrimsonR	0.5	1	1	yes
ChrimsonR	0.05	1	2	yes
ChrimsonR	0.05	1	3	no
ChrimsonR	0.05	1	4	no
ChrimsonR	0.05	1	5	yes
ChrimsonR	0.05	1	6	no
ChrimsonR	0.05	1	7	no
ChrimsonR	0.2	1	8	yes
ChrimsonR	0.2	1	9	yes
ChrimsonR	0.2	1	10	no
ChrimsonR	0.2	1	11	no
ChrimsonR	0.2	1	12	no
ChrimsonR	0.2	1	13	no
ChrimsonR	0.5	2	1	yes
ChrimsonR	0.05	2	2	yes
ChrimsonR	0.05	2	3	no
ChrimsonR	0.05	2	4	no
ChrimsonR	0.05	2	5	no
ChrimsonR	0.05	2	6	no
ChrimsonR	0.05	2	7	yes
ChrimsonR	0.2	2	8	yes
ChrimsonR	0.2	2	9	yes
ChrimsonR	0.2	2	10	yes
ChrimsonR	0.2	2	11	yes
ChrimsonR	0.2	2	12	no
ChrimsonR	0.2	2	13	yes
ChrimsonR	0.5	3	1	yes
ChrimsonR	0.05	3	2	yes
ChrimsonR	0.05	3	3	yes
ChrimsonR	0.05	3	4	yes
ChrimsonR	0.05	3	5	yes
ChrimsonR	0.05	3	6	yes
ChrimsonR	0.05	3	7	yes
ChrimsonR	0.2	3	8	yes
ChrimsonR	0.2	3	9	yes
ChrimsonR	0.2	3	10	yes
ChrimsonR	0.2	3	11	yes
ChrimsonR	0.2	3	12	yes
ChrimsonR	0.2	3	13	yes
ChrimsonR	0.5	4	1	yes
ChrimsonR	0.05	4	2	yes
ChrimsonR	0.05	4	3	yes
ChrimsonR	0.05	4	4	yes
ChrimsonR	0.05	4	5	yes
ChrimsonR	0.05	4	6	yes
ChrimsonR	0.05	4	7	yes
ChrimsonR	0.2	4	8	yes
ChrimsonR	0.2	4	9	yes
ChrimsonR	0.2	4	10	yes
ChrimsonR	0.2	4	11	yes
ChrimsonR	0.2	4	12	yes
ChrimsonR	0.2	4	13	yes
CoChR	0.5	1	1	yes
CoChR	0.05	1	2	yes
CoChR	0.05	1	3	yes
CoChR	0.05	1	4	yes
CoChR	0.05	1	5	yes
CoChR	0.05	1	6	yes
CoChR	0.05	1	7	yes
CoChR	0.2	1	8	yes
CoChR	0.2	1	9	yes
CoChR	0.2	1	10	yes
CoChR	0.2	1	11	yes
CoChR	0.2	1	12	yes
CoChR	0.2	1	13	yes
CoChR	0.5	2	1	yes
CoChR	0.05	2	2	yes
CoChR	0.05	2	3	yes
CoChR	0.05	2	4	yes
CoChR	0.05	2	5	yes
CoChR	0.05	2	6	yes
CoChR	0.05	2	7	yes
CoChR	0.2	2	8	yes
CoChR	0.2	2	9	yes
CoChR	0.2	2	10	yes
CoChR	0.2	2	11	yes
CoChR	0.2	2	12	yes
CoChR	0.2	2	13	yes
CoChR	0.5	3	1	yes
CoChR	0.05	3	2	yes
CoChR	0.05	3	3	yes
CoChR	0.05	3	4	yes
CoChR	0.05	3	5	yes
CoChR	0.05	3	6	yes
CoChR	0.05	3	7	yes
CoChR	0.2	3	8	yes
CoChR	0.2	3	9	yes
CoChR	0.2	3	10	yes
CoChR	0.2	3	11	yes
CoChR	0.2	3	12	yes
CoChR	0.2	3	13	yes
CoChR	0.5	4	1	yes
CoChR	0.05	4	2	yes
CoChR	0.05	4	3	yes
CoChR	0.05	4	4	yes
CoChR	0.05	4	5	yes
CoChR	0.05	4	6	yes
CoChR	0.05	4	7	yes
CoChR	0.2	4	8	yes
CoChR	0.2	4	9	yes
CoChR	0.2	4	10	yes
CoChR	0.2	4	11	yes
CoChR	0.2	4	12	yes
CoChR	0.2	4	13	yes

## Sheet: B
Line	light intensity	Sample_number	Trial_number	Latency to cardiac arrest (ms)
ChrimsonR	0.5	1	1	291
ChrimsonR	0.05	1	2	246
ChrimsonR	0.05	1	5	336
ChrimsonR	0.2	1	8	171
ChrimsonR	0.2	1	9	266
ChrimsonR	0.5	2	1	141
ChrimsonR	0.05	2	2	171
ChrimsonR	0.05	2	7	259
ChrimsonR	0.2	2	8	185
ChrimsonR	0.2	2	9	186
ChrimsonR	0.2	2	10	141
ChrimsonR	0.2	2	11	186
ChrimsonR	0.2	2	13	246
ChrimsonR	0.5	3	1	321
ChrimsonR	0.05	3	2	486
ChrimsonR	0.05	3	3	426
ChrimsonR	0.05	3	4	411
ChrimsonR	0.05	3	5	291
ChrimsonR	0.05	3	6	381
ChrimsonR	0.05	3	7	381
ChrimsonR	0.2	3	8	216
ChrimsonR	0.2	3	9	186
ChrimsonR	0.2	3	10	171
ChrimsonR	0.2	3	11	186
ChrimsonR	0.2	3	12	276
ChrimsonR	0.2	3	13	183
ChrimsonR	0.5	4	1	96
ChrimsonR	0.05	4	2	111
ChrimsonR	0.05	4	3	77
ChrimsonR	0.05	4	4	55
ChrimsonR	0.05	4	5	141
ChrimsonR	0.05	4	6	201
ChrimsonR	0.05	4	7	111
ChrimsonR	0.2	4	8	306
ChrimsonR	0.2	4	9	306
ChrimsonR	0.2	4	10	216
ChrimsonR	0.2	4	11	201
ChrimsonR	0.2	4	12	111
ChrimsonR	0.2	4	13	66
CoChR	0.5	1	1	198
CoChR	0.05	1	2	126
CoChR	0.05	1	3	126
CoChR	0.05	1	4	306
CoChR	0.05	1	5	246
CoChR	0.05	1	6	201
CoChR	0.05	1	7	66
CoChR	0.2	1	8	257
CoChR	0.2	1	9	81
CoChR	0.2	1	10	37
CoChR	0.2	1	11	81
CoChR	0.2	1	12	96
CoChR	0.2	1	13	201
CoChR	0.5	2	1	291
CoChR	0.05	2	2	276
CoChR	0.05	2	3	216
CoChR	0.05	2	4	216
CoChR	0.05	2	5	231
CoChR	0.05	2	6	276
CoChR	0.05	2	7	126
CoChR	0.2	2	8	141
CoChR	0.2	2	9	126
CoChR	0.2	2	10	231
CoChR	0.2	2	11	81
CoChR	0.2	2	12	156
CoChR	0.2	2	13	216
CoChR	0.5	3	1	231
CoChR	0.05	3	2	276
CoChR	0.05	3	3	216
CoChR	0.05	3	4	21
CoChR	0.05	3	5	157
CoChR	0.05	3	6	261
CoChR	0.05	3	7	51
CoChR	0.2	3	8	96
CoChR	0.2	3	9	246
CoChR	0.2	3	10	156
CoChR	0.2	3	11	186
CoChR	0.2	3	12	261
CoChR	0.2	3	13	201
CoChR	0.5	4	1	141
CoChR	0.05	4	2	201
CoChR	0.05	4	3	261
CoChR	0.05	4	4	306
CoChR	0.05	4	5	261
CoChR	0.05	4	6	6
CoChR	0.05	4	7	216
CoChR	0.2	4	8	201
CoChR	0.2	4	9	141
CoChR	0.2	4	10	6
CoChR	0.2	4	11	96
CoChR	0.2	4	12	36
CoChR	0.2	4	13	66

## Sheet: C
Line	light intensity	Sample_number	Trial_number	Time to resumption of heartbeat (ms)
ChrimsonR	0.5	1	1	486
ChrimsonR	0.05	1	2	471
ChrimsonR	0.05	1	5	636
ChrimsonR	0.2	1	8	441
ChrimsonR	0.2	1	9	366
ChrimsonR	0.5	2	1	501
ChrimsonR	0.05	2	2	501
ChrimsonR	0.05	2	7	619
ChrimsonR	0.2	2	8	455
ChrimsonR	0.2	2	9	426
ChrimsonR	0.2	2	10	426
ChrimsonR	0.2	2	11	441
ChrimsonR	0.2	2	13	381
ChrimsonR	0.5	3	1	666
ChrimsonR	0.05	3	2	651
ChrimsonR	0.05	3	3	576
ChrimsonR	0.05	3	4	621
ChrimsonR	0.05	3	5	421
ChrimsonR	0.05	3	6	591
ChrimsonR	0.05	3	7	531
ChrimsonR	0.2	3	8	456
ChrimsonR	0.2	3	9	710
ChrimsonR	0.2	3	10	426
ChrimsonR	0.2	3	11	486
ChrimsonR	0.2	3	12	456
ChrimsonR	0.2	3	13	363
ChrimsonR	0.5	4	1	471
ChrimsonR	0.05	4	2	261
ChrimsonR	0.05	4	3	377
ChrimsonR	0.05	4	4	306
ChrimsonR	0.05	4	5	366
ChrimsonR	0.05	4	6	306
ChrimsonR	0.05	4	7	306
ChrimsonR	0.2	4	8	403
ChrimsonR	0.2	4	9	441
ChrimsonR	0.2	4	10	471
ChrimsonR	0.2	4	11	381
ChrimsonR	0.2	4	12	396
ChrimsonR	0.2	4	13	276
CoChR	0.5	1	1	498
CoChR	0.05	1	2	546
CoChR	0.05	1	3	651
CoChR	0.05	1	4	635
CoChR	0.05	1	5	366
CoChR	0.05	1	6	501
CoChR	0.05	1	7	441
CoChR	0.2	1	8	497
CoChR	0.2	1	9	501
CoChR	0.2	1	10	561
CoChR	0.2	1	11	561
CoChR	0.2	1	12	471
CoChR	0.2	1	13	441
CoChR	0.5	2	1	651
CoChR	0.05	2	2	471
CoChR	0.05	2	3	471
CoChR	0.05	2	4	486
CoChR	0.05	2	5	516
CoChR	0.05	2	6	501
CoChR	0.05	2	7	501
CoChR	0.2	2	8	516
CoChR	0.2	2	9	576
CoChR	0.2	2	10	576
CoChR	0.2	2	11	501
CoChR	0.2	2	12	516
CoChR	0.2	2	13	426
CoChR	0.5	3	1	576
CoChR	0.05	3	2	576
CoChR	0.05	3	3	501
CoChR	0.05	3	4	366
CoChR	0.05	3	5	456
CoChR	0.05	3	6	501
CoChR	0.05	3	7	486
CoChR	0.2	3	8	471
CoChR	0.2	3	9	471
CoChR	0.2	3	10	351
CoChR	0.2	3	11	471
CoChR	0.2	3	12	612
CoChR	0.2	3	13	501
CoChR	0.5	4	1	651
CoChR	0.05	4	2	561
CoChR	0.05	4	3	531
CoChR	0.05	4	4	546
CoChR	0.05	4	5	456
CoChR	0.05	4	6	366
CoChR	0.05	4	7	456
CoChR	0.2	4	8	531
CoChR	0.2	4	9	576
CoChR	0.2	4	10	591
CoChR	0.2	4	11	546
CoChR	0.2	4	12	441
CoChR	0.2	4	13	576
