# Supplementary material for: Optogenetic manipulation of neuronal and cardiomyocyte functions in zebrafish using microbial rhodopsins and adenylyl cyclases
Source: eLife. 2023 Aug 17;12:e83975. doi: 10.7554/eLife.83975 (PMC10435232; doi:10.7554/eLife.83975)
Supplement: Figure 5—source data 1. [file elife-83975-fig5-data1.xlsx]

## Sheet: A
Line	Tg(UAS:opto-tool) or Control	Sample_number	Trial_number	Cardiac arrest
GtCCR4-3.0-EYFP	Tg(UAS:opto-tool)	1	1	yes
GtCCR4-3.0-EYFP	Tg(UAS:opto-tool)	1	2	yes
GtCCR4-3.0-EYFP	Tg(UAS:opto-tool)	1	3	yes
GtCCR4-3.0-EYFP	Tg(UAS:opto-tool)	1	4	yes
GtCCR4-3.0-EYFP	Tg(UAS:opto-tool)	1	5	yes
GtCCR4-3.0-EYFP	Tg(UAS:opto-tool)	1	6	yes
GtCCR4-3.0-EYFP	Tg(UAS:opto-tool)	2	1	yes
GtCCR4-3.0-EYFP	Tg(UAS:opto-tool)	2	2	yes
GtCCR4-3.0-EYFP	Tg(UAS:opto-tool)	2	3	yes
GtCCR4-3.0-EYFP	Tg(UAS:opto-tool)	2	4	yes
GtCCR4-3.0-EYFP	Tg(UAS:opto-tool)	2	5	yes
GtCCR4-3.0-EYFP	Tg(UAS:opto-tool)	2	6	yes
GtCCR4-3.0-EYFP	Tg(UAS:opto-tool)	3	1	yes
GtCCR4-3.0-EYFP	Tg(UAS:opto-tool)	3	2	yes
GtCCR4-3.0-EYFP	Tg(UAS:opto-tool)	3	3	yes
GtCCR4-3.0-EYFP	Tg(UAS:opto-tool)	3	4	yes
GtCCR4-3.0-EYFP	Tg(UAS:opto-tool)	3	5	yes
GtCCR4-3.0-EYFP	Tg(UAS:opto-tool)	3	6	yes
GtCCR4-3.0-EYFP	Tg(UAS:opto-tool)	4	1	yes
GtCCR4-3.0-EYFP	Tg(UAS:opto-tool)	4	2	yes
GtCCR4-3.0-EYFP	Tg(UAS:opto-tool)	4	3	yes
GtCCR4-3.0-EYFP	Tg(UAS:opto-tool)	4	4	yes
GtCCR4-3.0-EYFP	Tg(UAS:opto-tool)	4	5	yes
GtCCR4-3.0-EYFP	Tg(UAS:opto-tool)	4	6	yes
GtCCR4-3.0-EYFP	Control	1	1	no
GtCCR4-3.0-EYFP	Control	1	2	no
GtCCR4-3.0-EYFP	Control	1	3	no
GtCCR4-3.0-EYFP	Control	1	4	no
GtCCR4-3.0-EYFP	Control	1	5	no
GtCCR4-3.0-EYFP	Control	1	6	no
GtCCR4-3.0-EYFP	Control	2	1	no
GtCCR4-3.0-EYFP	Control	2	2	no
GtCCR4-3.0-EYFP	Control	2	3	no
GtCCR4-3.0-EYFP	Control	2	4	no
GtCCR4-3.0-EYFP	Control	2	5	no
GtCCR4-3.0-EYFP	Control	2	6	no
GtCCR4-3.0-EYFP	Control	3	1	no
GtCCR4-3.0-EYFP	Control	3	2	no
GtCCR4-3.0-EYFP	Control	3	3	no
GtCCR4-3.0-EYFP	Control	3	4	no
GtCCR4-3.0-EYFP	Control	3	5	no
GtCCR4-3.0-EYFP	Control	3	6	no
GtCCR4-3.0-EYFP	Control	4	1	no
GtCCR4-3.0-EYFP	Control	4	2	no
GtCCR4-3.0-EYFP	Control	4	3	no
GtCCR4-3.0-EYFP	Control	4	4	no
GtCCR4-3.0-EYFP	Control	4	5	no
GtCCR4-3.0-EYFP	Control	4	6	no
KnChR-3.0-EYFP	Tg(UAS:opto-tool)	1	1	yes
KnChR-3.0-EYFP	Tg(UAS:opto-tool)	1	2	yes
KnChR-3.0-EYFP	Tg(UAS:opto-tool)	1	3	yes
KnChR-3.0-EYFP	Tg(UAS:opto-tool)	1	4	yes
KnChR-3.0-EYFP	Tg(UAS:opto-tool)	1	5	yes
KnChR-3.0-EYFP	Tg(UAS:opto-tool)	1	6	yes
KnChR-3.0-EYFP	Tg(UAS:opto-tool)	2	1	yes
KnChR-3.0-EYFP	Tg(UAS:opto-tool)	2	2	yes
KnChR-3.0-EYFP	Tg(UAS:opto-tool)	2	3	yes
KnChR-3.0-EYFP	Tg(UAS:opto-tool)	2	4	yes
KnChR-3.0-EYFP	Tg(UAS:opto-tool)	2	5	yes
KnChR-3.0-EYFP	Tg(UAS:opto-tool)	2	6	yes
KnChR-3.0-EYFP	Tg(UAS:opto-tool)	3	1	yes
KnChR-3.0-EYFP	Tg(UAS:opto-tool)	3	2	yes
KnChR-3.0-EYFP	Tg(UAS:opto-tool)	3	3	yes
KnChR-3.0-EYFP	Tg(UAS:opto-tool)	3	4	yes
KnChR-3.0-EYFP	Tg(UAS:opto-tool)	3	5	yes
KnChR-3.0-EYFP	Tg(UAS:opto-tool)	3	6	yes
KnChR-3.0-EYFP	Tg(UAS:opto-tool)	4	1	yes
KnChR-3.0-EYFP	Tg(UAS:opto-tool)	4	2	yes
KnChR-3.0-EYFP	Tg(UAS:opto-tool)	4	3	yes
KnChR-3.0-EYFP	Tg(UAS:opto-tool)	4	4	yes
KnChR-3.0-EYFP	Tg(UAS:opto-tool)	4	5	yes
KnChR-3.0-EYFP	Tg(UAS:opto-tool)	4	6	yes
KnChR-3.0-EYFP	Control	1	1	no
KnChR-3.0-EYFP	Control	1	2	no
KnChR-3.0-EYFP	Control	1	3	no
KnChR-3.0-EYFP	Control	1	4	no
KnChR-3.0-EYFP	Control	1	5	no
KnChR-3.0-EYFP	Control	1	6	no
KnChR-3.0-EYFP	Control	2	1	no
KnChR-3.0-EYFP	Control	2	2	no
KnChR-3.0-EYFP	Control	2	3	no
KnChR-3.0-EYFP	Control	2	4	no
KnChR-3.0-EYFP	Control	2	5	no
KnChR-3.0-EYFP	Control	2	6	no
KnChR-3.0-EYFP	Control	3	1	no
KnChR-3.0-EYFP	Control	3	2	no
KnChR-3.0-EYFP	Control	3	3	no
KnChR-3.0-EYFP	Control	3	4	no
KnChR-3.0-EYFP	Control	3	5	no
KnChR-3.0-EYFP	Control	3	6	no
KnChR-3.0-EYFP	Control	4	1	no
KnChR-3.0-EYFP	Control	4	2	no
KnChR-3.0-EYFP	Control	4	3	no
KnChR-3.0-EYFP	Control	4	4	no
KnChR-3.0-EYFP	Control	4	5	no
KnChR-3.0-EYFP	Control	4	6	no
CrChR2[T159C]-mCherry	Tg(UAS:opto-tool)	1	1	yes
CrChR2[T159C]-mCherry	Tg(UAS:opto-tool)	1	2	yes
CrChR2[T159C]-mCherry	Tg(UAS:opto-tool)	1	3	yes
CrChR2[T159C]-mCherry	Tg(UAS:opto-tool)	1	4	yes
CrChR2[T159C]-mCherry	Tg(UAS:opto-tool)	1	5	yes
CrChR2[T159C]-mCherry	Tg(UAS:opto-tool)	1	6	yes
CrChR2[T159C]-mCherry	Tg(UAS:opto-tool)	2	1	yes
CrChR2[T159C]-mCherry	Tg(UAS:opto-tool)	2	2	yes
CrChR2[T159C]-mCherry	Tg(UAS:opto-tool)	2	3	yes
CrChR2[T159C]-mCherry	Tg(UAS:opto-tool)	2	4	yes
CrChR2[T159C]-mCherry	Tg(UAS:opto-tool)	2	5	yes
CrChR2[T159C]-mCherry	Tg(UAS:opto-tool)	2	6	yes
CrChR2[T159C]-mCherry	Tg(UAS:opto-tool)	3	1	yes
CrChR2[T159C]-mCherry	Tg(UAS:opto-tool)	3	2	yes
CrChR2[T159C]-mCherry	Tg(UAS:opto-tool)	3	3	yes
CrChR2[T159C]-mCherry	Tg(UAS:opto-tool)	3	4	yes
CrChR2[T159C]-mCherry	Tg(UAS:opto-tool)	3	5	yes
CrChR2[T159C]-mCherry	Tg(UAS:opto-tool)	3	6	yes
CrChR2[T159C]-mCherry	Tg(UAS:opto-tool)	4	1	yes
CrChR2[T159C]-mCherry	Tg(UAS:opto-tool)	4	2	yes
CrChR2[T159C]-mCherry	Tg(UAS:opto-tool)	4	3	yes
CrChR2[T159C]-mCherry	Tg(UAS:opto-tool)	4	4	yes
CrChR2[T159C]-mCherry	Tg(UAS:opto-tool)	4	5	yes
CrChR2[T159C]-mCherry	Tg(UAS:opto-tool)	4	6	yes
CrChR2[T159C]-mCherry	Control	1	1	no
CrChR2[T159C]-mCherry	Control	1	2	no
CrChR2[T159C]-mCherry	Control	1	3	no
CrChR2[T159C]-mCherry	Control	1	4	no
CrChR2[T159C]-mCherry	Control	1	5	no
CrChR2[T159C]-mCherry	Control	1	6	no
CrChR2[T159C]-mCherry	Control	2	1	no
CrChR2[T159C]-mCherry	Control	2	2	no
CrChR2[T159C]-mCherry	Control	2	3	no
CrChR2[T159C]-mCherry	Control	2	4	no
CrChR2[T159C]-mCherry	Control	2	5	no
CrChR2[T159C]-mCherry	Control	2	6	no
CrChR2[T159C]-mCherry	Control	3	1	no
CrChR2[T159C]-mCherry	Control	3	2	no
CrChR2[T159C]-mCherry	Control	3	3	no
CrChR2[T159C]-mCherry	Control	3	4	no
CrChR2[T159C]-mCherry	Control	3	5	no
CrChR2[T159C]-mCherry	Control	3	6	no
CrChR2[T159C]-mCherry	Control	4	1	no
CrChR2[T159C]-mCherry	Control	4	2	no
CrChR2[T159C]-mCherry	Control	4	3	no
CrChR2[T159C]-mCherry	Control	4	4	no
CrChR2[T159C]-mCherry	Control	4	5	no
CrChR2[T159C]-mCherry	Control	4	6	no
GtACR1-EYFP	Tg(UAS:opto-tool)	1	1	yes
GtACR1-EYFP	Tg(UAS:opto-tool)	1	2	yes
GtACR1-EYFP	Tg(UAS:opto-tool)	1	3	yes
GtACR1-EYFP	Tg(UAS:opto-tool)	1	4	yes
GtACR1-EYFP	Tg(UAS:opto-tool)	1	5	yes
GtACR1-EYFP	Tg(UAS:opto-tool)	1	6	yes
GtACR1-EYFP	Tg(UAS:opto-tool)	2	1	yes
GtACR1-EYFP	Tg(UAS:opto-tool)	2	2	yes
GtACR1-EYFP	Tg(UAS:opto-tool)	2	3	yes
GtACR1-EYFP	Tg(UAS:opto-tool)	2	4	yes
GtACR1-EYFP	Tg(UAS:opto-tool)	2	5	yes
GtACR1-EYFP	Tg(UAS:opto-tool)	2	6	yes
GtACR1-EYFP	Tg(UAS:opto-tool)	3	1	yes
GtACR1-EYFP	Tg(UAS:opto-tool)	3	2	yes
GtACR1-EYFP	Tg(UAS:opto-tool)	3	3	yes
GtACR1-EYFP	Tg(UAS:opto-tool)	3	4	yes
GtACR1-EYFP	Tg(UAS:opto-tool)	3	5	yes
GtACR1-EYFP	Tg(UAS:opto-tool)	3	6	yes
GtACR1-EYFP	Tg(UAS:opto-tool)	4	1	yes
GtACR1-EYFP	Tg(UAS:opto-tool)	4	2	yes
GtACR1-EYFP	Tg(UAS:opto-tool)	4	3	yes
GtACR1-EYFP	Tg(UAS:opto-tool)	4	4	yes
GtACR1-EYFP	Tg(UAS:opto-tool)	4	5	yes
GtACR1-EYFP	Tg(UAS:opto-tool)	4	6	yes
GtACR1-EYFP	Control	1	1	no
GtACR1-EYFP	Control	1	2	no
GtACR1-EYFP	Control	1	3	no
GtACR1-EYFP	Control	1	4	no
GtACR1-EYFP	Control	1	5	no
GtACR1-EYFP	Control	1	6	no
GtACR1-EYFP	Control	2	1	no
GtACR1-EYFP	Control	2	2	no
GtACR1-EYFP	Control	2	3	no
GtACR1-EYFP	Control	2	4	no
GtACR1-EYFP	Control	2	5	no
GtACR1-EYFP	Control	2	6	no
GtACR1-EYFP	Control	3	1	no
GtACR1-EYFP	Control	3	2	no
GtACR1-EYFP	Control	3	3	no
GtACR1-EYFP	Control	3	4	no
GtACR1-EYFP	Control	3	5	no
GtACR1-EYFP	Control	3	6	no
GtACR1-EYFP	Control	4	1	no
GtACR1-EYFP	Control	4	2	no
GtACR1-EYFP	Control	4	3	no
GtACR1-EYFP	Control	4	4	no
GtACR1-EYFP	Control	4	5	no
GtACR1-EYFP	Control	4	6	no

## Sheet: B
Line	Sample_number	Trial_number	Latency to cardiac arrest (ms)
GtCCR4-3.0-EYFP	1	1	248
GtCCR4-3.0-EYFP	1	2	249
GtCCR4-3.0-EYFP	1	3	84
GtCCR4-3.0-EYFP	1	4	129
GtCCR4-3.0-EYFP	1	5	144
GtCCR4-3.0-EYFP	1	6	69
GtCCR4-3.0-EYFP	2	1	159
GtCCR4-3.0-EYFP	2	2	189
GtCCR4-3.0-EYFP	2	3	54
GtCCR4-3.0-EYFP	2	4	204
GtCCR4-3.0-EYFP	2	5	170
GtCCR4-3.0-EYFP	2	6	39
GtCCR4-3.0-EYFP	3	1	141
GtCCR4-3.0-EYFP	3	2	97
GtCCR4-3.0-EYFP	3	3	307
GtCCR4-3.0-EYFP	3	4	204
GtCCR4-3.0-EYFP	3	5	201
GtCCR4-3.0-EYFP	3	6	201
GtCCR4-3.0-EYFP	4	1	231
GtCCR4-3.0-EYFP	4	2	216
GtCCR4-3.0-EYFP	4	3	111
GtCCR4-3.0-EYFP	4	4	111
GtCCR4-3.0-EYFP	4	5	276
GtCCR4-3.0-EYFP	4	6	81
KnChR-3.0-EYFP	1	1	9
KnChR-3.0-EYFP	1	2	39
KnChR-3.0-EYFP	1	3	69
KnChR-3.0-EYFP	1	4	39
KnChR-3.0-EYFP	1	5	159
KnChR-3.0-EYFP	1	6	248
KnChR-3.0-EYFP	2	1	24
KnChR-3.0-EYFP	2	2	84
KnChR-3.0-EYFP	2	3	54
KnChR-3.0-EYFP	2	4	24
KnChR-3.0-EYFP	2	5	69
KnChR-3.0-EYFP	2	6	24
KnChR-3.0-EYFP	3	1	65
KnChR-3.0-EYFP	3	2	10
KnChR-3.0-EYFP	3	3	32
KnChR-3.0-EYFP	3	4	10
KnChR-3.0-EYFP	3	5	54
KnChR-3.0-EYFP	3	6	21
KnChR-3.0-EYFP	4	1	32
KnChR-3.0-EYFP	4	2	10
KnChR-3.0-EYFP	4	3	43
KnChR-3.0-EYFP	4	4	32
KnChR-3.0-EYFP	4	5	98
KnChR-3.0-EYFP	4	6	76
ChChR2[T159C]-mCherry	1	1	204
ChChR2[T159C]-mCherry	1	2	99
ChChR2[T159C]-mCherry	1	3	129
ChChR2[T159C]-mCherry	1	4	174
ChChR2[T159C]-mCherry	1	5	39
ChChR2[T159C]-mCherry	1	6	114
ChChR2[T159C]-mCherry	2	1	144
ChChR2[T159C]-mCherry	2	2	84
ChChR2[T159C]-mCherry	2	3	84
ChChR2[T159C]-mCherry	2	4	39
ChChR2[T159C]-mCherry	2	5	129
ChChR2[T159C]-mCherry	2	6	54
ChChR2[T159C]-mCherry	3	1	99
ChChR2[T159C]-mCherry	3	2	159
ChChR2[T159C]-mCherry	3	3	159
ChChR2[T159C]-mCherry	3	4	159
ChChR2[T159C]-mCherry	3	5	24
ChChR2[T159C]-mCherry	3	6	144
ChChR2[T159C]-mCherry	4	1	144
ChChR2[T159C]-mCherry	4	2	99
ChChR2[T159C]-mCherry	4	3	24
ChChR2[T159C]-mCherry	4	4	129
ChChR2[T159C]-mCherry	4	5	54
ChChR2[T159C]-mCherry	4	6	189
GtACR1-EYFP	1	1	338
GtACR1-EYFP	1	2	84
GtACR1-EYFP	1	3	144
GtACR1-EYFP	1	4	204
GtACR1-EYFP	1	5	99
GtACR1-EYFP	1	6	39
GtACR1-EYFP	2	1	159
GtACR1-EYFP	2	2	593
GtACR1-EYFP	2	3	69
GtACR1-EYFP	2	4	593
GtACR1-EYFP	2	5	173
GtACR1-EYFP	2	6	230
GtACR1-EYFP	3	1	786
GtACR1-EYFP	3	2	456
GtACR1-EYFP	3	3	111
GtACR1-EYFP	3	4	96
GtACR1-EYFP	3	5	201
GtACR1-EYFP	3	6	441
GtACR1-EYFP	4	1	248
GtACR1-EYFP	4	2	159
GtACR1-EYFP	4	3	219
GtACR1-EYFP	4	4	84
GtACR1-EYFP	4	5	204
GtACR1-EYFP	4	6	99

## Sheet: C
Line	Sample_number	Trial_number	Time to resumption of heartbeat (ms)
GtCCR4-3.0-EYFP	1	1	283
GtCCR4-3.0-EYFP	1	2	328
GtCCR4-3.0-EYFP	1	3	283
GtCCR4-3.0-EYFP	1	4	298
GtCCR4-3.0-EYFP	1	5	238
GtCCR4-3.0-EYFP	1	6	328
GtCCR4-3.0-EYFP	2	1	238
GtCCR4-3.0-EYFP	2	2	283
GtCCR4-3.0-EYFP	2	3	298
GtCCR4-3.0-EYFP	2	4	302
GtCCR4-3.0-EYFP	2	5	248
GtCCR4-3.0-EYFP	2	6	358
GtCCR4-3.0-EYFP	3	1	505
GtCCR4-3.0-EYFP	3	2	491
GtCCR4-3.0-EYFP	3	3	1509
GtCCR4-3.0-EYFP	3	4	536
GtCCR4-3.0-EYFP	3	5	551
GtCCR4-3.0-EYFP	3	6	476
GtCCR4-3.0-EYFP	4	1	446
GtCCR4-3.0-EYFP	4	2	461
GtCCR4-3.0-EYFP	4	3	401
GtCCR4-3.0-EYFP	4	4	416
GtCCR4-3.0-EYFP	4	5	356
GtCCR4-3.0-EYFP	4	6	401
KnChR-3.0-EYFP	1	1	808
KnChR-3.0-EYFP	1	2	913
KnChR-3.0-EYFP	1	3	1123
KnChR-3.0-EYFP	1	4	673
KnChR-3.0-EYFP	1	5	689
KnChR-3.0-EYFP	1	6	720
KnChR-3.0-EYFP	2	1	493
KnChR-3.0-EYFP	2	2	658
KnChR-3.0-EYFP	2	3	598
KnChR-3.0-EYFP	2	4	853
KnChR-3.0-EYFP	2	5	928
KnChR-3.0-EYFP	2	6	718
KnChR-3.0-EYFP	3	1	965
KnChR-3.0-EYFP	3	2	767
KnChR-3.0-EYFP	3	3	767
KnChR-3.0-EYFP	3	4	767
KnChR-3.0-EYFP	3	5	1009
KnChR-3.0-EYFP	3	6	877
KnChR-3.0-EYFP	4	1	427
KnChR-3.0-EYFP	4	2	646
KnChR-3.0-EYFP	4	3	712
KnChR-3.0-EYFP	4	4	295
KnChR-3.0-EYFP	4	5	657
KnChR-3.0-EYFP	4	6	756
ChChR2[T159C]-mCherry	1	1	284
ChChR2[T159C]-mCherry	1	2	388
ChChR2[T159C]-mCherry	1	3	254
ChChR2[T159C]-mCherry	1	4	224
ChChR2[T159C]-mCherry	1	5	358
ChChR2[T159C]-mCherry	1	6	344
ChChR2[T159C]-mCherry	2	1	329
ChChR2[T159C]-mCherry	2	2	373
ChChR2[T159C]-mCherry	2	3	358
ChChR2[T159C]-mCherry	2	4	373
ChChR2[T159C]-mCherry	2	5	254
ChChR2[T159C]-mCherry	2	6	328
ChChR2[T159C]-mCherry	3	1	193
ChChR2[T159C]-mCherry	3	2	90
ChChR2[T159C]-mCherry	3	3	179
ChChR2[T159C]-mCherry	3	4	179
ChChR2[T159C]-mCherry	3	5	358
ChChR2[T159C]-mCherry	3	6	194
ChChR2[T159C]-mCherry	4	1	89
ChChR2[T159C]-mCherry	4	2	418
ChChR2[T159C]-mCherry	4	3	388
ChChR2[T159C]-mCherry	4	4	314
ChChR2[T159C]-mCherry	4	5	259
ChChR2[T159C]-mCherry	4	6	284
GtACR1-EYFP	1	1	4734
GtACR1-EYFP	1	2	1152
GtACR1-EYFP	1	3	1237
GtACR1-EYFP	1	4	1058
GtACR1-EYFP	1	5	1447
GtACR1-EYFP	1	6	1462
GtACR1-EYFP	2	1	1088
GtACR1-EYFP	2	2	1312
GtACR1-EYFP	2	3	2017
GtACR1-EYFP	2	4	1103
GtACR1-EYFP	2	5	1797
GtACR1-EYFP	2	6	1402
GtACR1-EYFP	3	1	1315
GtACR1-EYFP	3	2	850
GtACR1-EYFP	3	3	1165
GtACR1-EYFP	3	4	895
GtACR1-EYFP	3	5	1914
GtACR1-EYFP	3	6	1600
GtACR1-EYFP	4	1	948
GtACR1-EYFP	4	2	688
GtACR1-EYFP	4	3	748
GtACR1-EYFP	4	4	718
GtACR1-EYFP	4	5	823
GtACR1-EYFP	4	6	928

## Sheet: D
Line	light intensity (mW/mm2)	Sample_number	Trial_number	Cardiac arrest
GtCCR4	0.5	1	1	yes
GtCCR4	0.05	1	2	yes
GtCCR4	0.05	1	3	yes
GtCCR4	0.05	1	4	yes
GtCCR4	0.05	1	5	yes
GtCCR4	0.05	1	6	yes
GtCCR4	0.05	1	7	no
GtCCR4	0.2	1	8	yes
GtCCR4	0.2	1	9	no
GtCCR4	0.2	1	10	yes
GtCCR4	0.2	1	11	yes
GtCCR4	0.2	1	12	no
GtCCR4	0.2	1	13	yes
GtCCR4	0.5	2	1	yes
GtCCR4	0.05	2	2	no
GtCCR4	0.05	2	3	no
GtCCR4	0.05	2	4	no
GtCCR4	0.05	2	5	no
GtCCR4	0.05	2	6	no
GtCCR4	0.05	2	7	no
GtCCR4	0.2	2	8	yes
GtCCR4	0.2	2	9	yes
GtCCR4	0.2	2	10	no
GtCCR4	0.2	2	11	no
GtCCR4	0.2	2	12	yes
GtCCR4	0.2	2	13	no
GtCCR4	0.5	3	1	yes
GtCCR4	0.05	3	2	no
GtCCR4	0.05	3	3	yes
GtCCR4	0.05	3	4	no
GtCCR4	0.05	3	5	yes
GtCCR4	0.05	3	6	yes
GtCCR4	0.05	3	7	yes
GtCCR4	0.2	3	8	no
GtCCR4	0.2	3	9	yes
GtCCR4	0.2	3	10	yes
GtCCR4	0.2	3	11	yes
GtCCR4	0.2	3	12	yes
GtCCR4	0.2	3	13	no
GtCCR4	0.5	4	1	yes
GtCCR4	0.05	4	2	yes
GtCCR4	0.05	4	3	yes
GtCCR4	0.05	4	4	no
GtCCR4	0.05	4	5	yes
GtCCR4	0.05	4	6	no
GtCCR4	0.05	4	7	no
GtCCR4	0.2	4	8	no
GtCCR4	0.2	4	9	yes
GtCCR4	0.2	4	10	no
GtCCR4	0.2	4	11	yes
GtCCR4	0.2	4	12	yes
GtCCR4	0.2	4	13	yes
KnChR	0.5	1	1	yes
KnChR	0.05	1	2	yes
KnChR	0.05	1	3	yes
KnChR	0.05	1	4	yes
KnChR	0.05	1	5	yes
KnChR	0.05	1	6	yes
KnChR	0.05	1	7	yes
KnChR	0.2	1	8	yes
KnChR	0.2	1	9	yes
KnChR	0.2	1	10	yes
KnChR	0.2	1	11	yes
KnChR	0.2	1	12	yes
KnChR	0.2	1	13	yes
KnChR	0.5	2	1	yes
KnChR	0.05	2	2	yes
KnChR	0.05	2	3	yes
KnChR	0.05	2	4	yes
KnChR	0.05	2	5	yes
KnChR	0.05	2	6	yes
KnChR	0.05	2	7	yes
KnChR	0.2	2	8	yes
KnChR	0.2	2	9	yes
KnChR	0.2	2	10	yes
KnChR	0.2	2	11	yes
KnChR	0.2	2	12	yes
KnChR	0.2	2	13	yes
KnChR	0.5	3	1	yes
KnChR	0.05	3	2	yes
KnChR	0.05	3	3	yes
KnChR	0.05	3	4	yes
KnChR	0.05	3	5	yes
KnChR	0.05	3	6	yes
KnChR	0.05	3	7	yes
KnChR	0.2	3	8	yes
KnChR	0.2	3	9	yes
KnChR	0.2	3	10	yes
KnChR	0.2	3	11	yes
KnChR	0.2	3	12	yes
KnChR	0.2	3	13	yes
KnChR	0.5	4	1	yes
KnChR	0.05	4	2	yes
KnChR	0.05	4	3	yes
KnChR	0.05	4	4	yes
KnChR	0.05	4	5	yes
KnChR	0.05	4	6	yes
KnChR	0.05	4	7	yes
KnChR	0.2	4	8	yes
KnChR	0.2	4	9	yes
KnChR	0.2	4	10	yes
KnChR	0.2	4	11	yes
KnChR	0.2	4	12	yes
KnChR	0.2	4	13	yes
ChR2	0.5	1	1	yes
ChR2	0.05	1	2	yes
ChR2	0.05	1	3	yes
ChR2	0.05	1	4	yes
ChR2	0.05	1	5	yes
ChR2	0.05	1	6	yes
ChR2	0.05	1	7	yes
ChR2	0.2	1	8	yes
ChR2	0.2	1	9	yes
ChR2	0.2	1	10	yes
ChR2	0.2	1	11	yes
ChR2	0.2	1	12	yes
ChR2	0.2	1	13	no
ChR2	0.5	2	1	yes
ChR2	0.05	2	2	no
ChR2	0.05	2	3	no
ChR2	0.05	2	4	no
ChR2	0.05	2	5	no
ChR2	0.05	2	6	no
ChR2	0.05	2	7	no
ChR2	0.2	2	8	yes
ChR2	0.2	2	9	yes
ChR2	0.2	2	10	yes
ChR2	0.2	2	11	yes
ChR2	0.2	2	13	no
ChR2	0.5	3	1	yes
ChR2	0.05	3	2	no
ChR2	0.05	3	3	no
ChR2	0.05	3	4	no
ChR2	0.05	3	5	no
ChR2	0.05	3	6	no
ChR2	0.05	3	7	no
ChR2	0.2	3	8	yes
ChR2	0.2	3	9	yes
ChR2	0.2	3	10	no
ChR2	0.2	3	11	no
ChR2	0.2	3	12	no
ChR2	0.2	3	13	no
GtACR1	0.5	1	1	yes
GtACR1	0.05	1	2	yes
GtACR1	0.05	1	3	yes
GtACR1	0.05	1	4	yes
GtACR1	0.05	1	5	yes
GtACR1	0.05	1	6	yes
GtACR1	0.05	1	7	yes
GtACR1	0.2	1	8	yes
GtACR1	0.2	1	9	yes
GtACR1	0.2	1	10	yes
GtACR1	0.2	1	11	yes
GtACR1	0.2	1	12	yes
GtACR1	0.2	1	13	yes
GtACR1	0.5	2	1	yes
GtACR1	0.05	2	2	yes
GtACR1	0.05	2	3	yes
GtACR1	0.05	2	4	yes
GtACR1	0.05	2	5	yes
GtACR1	0.05	2	6	yes
GtACR1	0.05	2	7	yes
GtACR1	0.2	2	8	yes
GtACR1	0.2	2	9	yes
GtACR1	0.2	2	10	yes
GtACR1	0.2	2	11	yes
GtACR1	0.2	2	12	yes
GtACR1	0.2	2	13	yes
GtACR1	0.5	3	1	yes
GtACR1	0.05	3	2	yes
GtACR1	0.05	3	3	yes
GtACR1	0.05	3	4	yes
GtACR1	0.05	3	5	yes
GtACR1	0.05	3	6	yes
GtACR1	0.05	3	7	yes
GtACR1	0.2	3	8	yes
GtACR1	0.2	3	9	yes
GtACR1	0.2	3	10	yes
GtACR1	0.2	3	11	yes
GtACR1	0.2	3	12	yes
GtACR1	0.2	3	13	yes
GtACR1	0.5	4	1	yes
GtACR1	0.05	4	2	yes
GtACR1	0.05	4	3	yes
GtACR1	0.05	4	4	yes
GtACR1	0.05	4	5	yes
GtACR1	0.05	4	6	yes
GtACR1	0.05	4	7	yes
GtACR1	0.2	4	8	yes
GtACR1	0.2	4	9	yes
GtACR1	0.2	4	10	yes
GtACR1	0.2	4	11	yes
GtACR1	0.2	4	12	yes
GtACR1	0.2	4	13	yes

## Sheet: E
time point	KnChR-3.0-EYFP or control	sample number	trial number	ΔF/F
0	KnChR-3.0-EYFP	1	1	0
0.116959	KnChR-3.0-EYFP	1	1	-0.0494523
0.233918	KnChR-3.0-EYFP	1	1	-0.0949515
0.350877	KnChR-3.0-EYFP	1	1	-0.134825
0.467836	KnChR-3.0-EYFP	1	1	-0.174411
0.584795	KnChR-3.0-EYFP	1	1	-0.199922
0.701754	KnChR-3.0-EYFP	1	1	-0.225776
0.818713	KnChR-3.0-EYFP	1	1	-0.247613
0.935673	KnChR-3.0-EYFP	1	1	-0.267618
1.05263	KnChR-3.0-EYFP	1	1	-0.284815
1.16959	KnChR-3.0-EYFP	1	1	-0.300531
1.28655	KnChR-3.0-EYFP	1	1	-0.312622
1.40351	KnChR-3.0-EYFP	1	1	-0.328161
1.52047	KnChR-3.0-EYFP	1	1	-0.338516
1.63743	KnChR-3.0-EYFP	1	1	-0.346902
1.75439	KnChR-3.0-EYFP	1	1	-0.352968
1.87135	KnChR-3.0-EYFP	1	1	-0.358809
1.9883	KnChR-3.0-EYFP	1	1	-0.365459
2.10526	KnChR-3.0-EYFP	1	1	-0.37018
2.22222	KnChR-3.0-EYFP	1	1	-0.374061
2.33918	KnChR-3.0-EYFP	1	1	-0.377614
2.45614	KnChR-3.0-EYFP	1	1	-0.381303
2.5731	KnChR-3.0-EYFP	1	1	-0.383799
2.69006	KnChR-3.0-EYFP	1	1	-0.385176
2.80702	KnChR-3.0-EYFP	1	1	-0.386064
2.92398	KnChR-3.0-EYFP	1	1	-0.387528
3.04094	KnChR-3.0-EYFP	1	1	-0.388192
3.15789	KnChR-3.0-EYFP	1	1	-0.388392
3.27485	KnChR-3.0-EYFP	1	1	-0.387872
3.39181	KnChR-3.0-EYFP	1	1	-0.387976
3.50877	KnChR-3.0-EYFP	1	1	-0.38692
3.62573	KnChR-3.0-EYFP	1	1	-0.387488
3.74269	KnChR-3.0-EYFP	1	1	-0.384095
3.85965	KnChR-3.0-EYFP	1	1	-0.384671
3.97661	KnChR-3.0-EYFP	1	1	-0.384399
4.09357	KnChR-3.0-EYFP	1	1	-0.382335
4.21053	KnChR-3.0-EYFP	1	1	-0.380606
4.32749	KnChR-3.0-EYFP	1	1	-0.379734
4.44444	KnChR-3.0-EYFP	1	1	-0.377238
4.5614	KnChR-3.0-EYFP	1	1	-0.375325
4.67836	KnChR-3.0-EYFP	1	1	-0.373645
4.79532	KnChR-3.0-EYFP	1	1	-0.370316
4.91228	KnChR-3.0-EYFP	1	1	-0.368923
5.02924	KnChR-3.0-EYFP	1	1	-0.367611
5.1462	KnChR-3.0-EYFP	1	1	-0.366835
5.26316	KnChR-3.0-EYFP	1	1	-0.363722
5.38012	KnChR-3.0-EYFP	1	1	-0.362162
5.49708	KnChR-3.0-EYFP	1	1	-0.360209
5.61404	KnChR-3.0-EYFP	1	1	-0.358249
5.73099	KnChR-3.0-EYFP	1	1	-0.358345
5.84795	KnChR-3.0-EYFP	1	1	-0.355272
5.96491	KnChR-3.0-EYFP	1	1	-0.352912
6.08187	KnChR-3.0-EYFP	1	1	-0.350391
6.19883	KnChR-3.0-EYFP	1	1	-0.348879
6.31579	KnChR-3.0-EYFP	1	1	-0.34503
6.43275	KnChR-3.0-EYFP	1	1	-0.343925
6.54971	KnChR-3.0-EYFP	1	1	-0.343181
6.66667	KnChR-3.0-EYFP	1	1	-0.341653
6.78363	KnChR-3.0-EYFP	1	1	-0.336972
6.90058	KnChR-3.0-EYFP	1	1	-0.335587
7.01754	KnChR-3.0-EYFP	1	1	-0.333827
7.1345	KnChR-3.0-EYFP	1	1	-0.365747
7.25146	KnChR-3.0-EYFP	1	1	-0.327921
7.36842	KnChR-3.0-EYFP	1	1	-0.32985
7.48538	KnChR-3.0-EYFP	1	1	-0.328121
7.60234	KnChR-3.0-EYFP	1	1	-0.327377
7.7193	KnChR-3.0-EYFP	1	1	-0.326553
7.83626	KnChR-3.0-EYFP	1	1	-0.323776
7.95322	KnChR-3.0-EYFP	1	1	-0.3214
8.07018	KnChR-3.0-EYFP	1	1	-0.320728
8.18713	KnChR-3.0-EYFP	1	1	-0.319407
8.30409	KnChR-3.0-EYFP	1	1	-0.319359
8.42105	KnChR-3.0-EYFP	1	1	-0.317103
8.53801	KnChR-3.0-EYFP	1	1	-0.313982
8.65497	KnChR-3.0-EYFP	1	1	-0.315134
8.77193	KnChR-3.0-EYFP	1	1	-0.314638
8.88889	KnChR-3.0-EYFP	1	1	-0.311773
9.00585	KnChR-3.0-EYFP	1	1	-0.311293
9.12281	KnChR-3.0-EYFP	1	1	-0.310333
9.23977	KnChR-3.0-EYFP	1	1	-0.310597
9.35673	KnChR-3.0-EYFP	1	1	-0.308637
9.47368	KnChR-3.0-EYFP	1	1	-0.307996
9.59064	KnChR-3.0-EYFP	1	1	-0.306196
9.7076	KnChR-3.0-EYFP	1	1	-0.305092
9.82456	KnChR-3.0-EYFP	1	1	-0.304956
9.94152	KnChR-3.0-EYFP	1	1	-0.306396
10.0585	KnChR-3.0-EYFP	1	1	-0.304532
10.1754	KnChR-3.0-EYFP	1	1	-0.303435
10.2924	KnChR-3.0-EYFP	1	1	-0.304083
10.4094	KnChR-3.0-EYFP	1	1	-0.301699
10.5263	KnChR-3.0-EYFP	1	1	-0.300931
10.6433	KnChR-3.0-EYFP	1	1	-0.299602
10.7602	KnChR-3.0-EYFP	1	1	-0.29941
10.8772	KnChR-3.0-EYFP	1	1	-0.298386
10.9942	KnChR-3.0-EYFP	1	1	-0.298226
11.1111	KnChR-3.0-EYFP	1	1	-0.29785
11.2281	KnChR-3.0-EYFP	1	1	-0.295841
11.345	KnChR-3.0-EYFP	1	1	-0.296394
11.462	KnChR-3.0-EYFP	1	1	-0.293041
11.5789	KnChR-3.0-EYFP	1	1	-0.29737
11.6959	KnChR-3.0-EYFP	1	1	-0.292673
11.8129	KnChR-3.0-EYFP	1	1	-0.292393
11.9298	KnChR-3.0-EYFP	1	1	-0.295057
12.0468	KnChR-3.0-EYFP	1	1	-0.292969
12.1637	KnChR-3.0-EYFP	1	1	-0.293145
12.2807	KnChR-3.0-EYFP	1	1	-0.291912
12.3977	KnChR-3.0-EYFP	1	1	-0.289672
12.5146	KnChR-3.0-EYFP	1	1	-0.289736
12.6316	KnChR-3.0-EYFP	1	1	-0.288536
12.7485	KnChR-3.0-EYFP	1	1	-0.287111
12.8655	KnChR-3.0-EYFP	1	1	-0.287159
12.9825	KnChR-3.0-EYFP	1	1	-0.286271
13.0994	KnChR-3.0-EYFP	1	1	-0.284567
13.2164	KnChR-3.0-EYFP	1	1	-0.284919
13.3333	KnChR-3.0-EYFP	1	1	-0.284479
13.4503	KnChR-3.0-EYFP	1	1	-0.28419
13.5673	KnChR-3.0-EYFP	1	1	-0.283262
13.6842	KnChR-3.0-EYFP	1	1	-0.283598
13.8012	KnChR-3.0-EYFP	1	1	-0.282438
13.9181	KnChR-3.0-EYFP	1	1	-0.281814
14.0351	KnChR-3.0-EYFP	1	1	-0.282438
14.152	KnChR-3.0-EYFP	1	1	-0.280894
14.269	KnChR-3.0-EYFP	1	1	-0.280117
14.386	KnChR-3.0-EYFP	1	1	-0.28031
14.5029	KnChR-3.0-EYFP	1	1	-0.279869
14.6199	KnChR-3.0-EYFP	1	1	-0.279213
14.7368	KnChR-3.0-EYFP	1	1	-0.278261
14.8538	KnChR-3.0-EYFP	1	1	-0.278901
14.9708	KnChR-3.0-EYFP	1	1	-0.276997
15.0877	KnChR-3.0-EYFP	1	1	-0.273412
15.2047	KnChR-3.0-EYFP	1	1	-0.275292
15.3216	KnChR-3.0-EYFP	1	1	-0.274244
15.4386	KnChR-3.0-EYFP	1	1	-0.274156
15.5556	KnChR-3.0-EYFP	1	1	-0.272916
15.6725	KnChR-3.0-EYFP	1	1	-0.27302
15.7895	KnChR-3.0-EYFP	1	1	-0.272051
15.9064	KnChR-3.0-EYFP	1	1	-0.273172
16.0234	KnChR-3.0-EYFP	1	1	-0.270075
16.1404	KnChR-3.0-EYFP	1	1	-0.272692
16.2573	KnChR-3.0-EYFP	1	1	-0.27286
16.3743	KnChR-3.0-EYFP	1	1	-0.272804
16.4912	KnChR-3.0-EYFP	1	1	-0.273156
16.6082	KnChR-3.0-EYFP	1	1	-0.271331
16.7251	KnChR-3.0-EYFP	1	1	-0.271123
16.8421	KnChR-3.0-EYFP	1	1	-0.270811
16.9591	KnChR-3.0-EYFP	1	1	-0.271947
17.076	KnChR-3.0-EYFP	1	1	-0.270043
17.193	KnChR-3.0-EYFP	1	1	-0.270003
17.3099	KnChR-3.0-EYFP	1	1	-0.270835
17.4269	KnChR-3.0-EYFP	1	1	-0.271443
17.5439	KnChR-3.0-EYFP	1	1	-0.270331
17.6608	KnChR-3.0-EYFP	1	1	-0.270835
17.7778	KnChR-3.0-EYFP	1	1	-0.269683
17.8947	KnChR-3.0-EYFP	1	1	-0.269763
18.0117	KnChR-3.0-EYFP	1	1	-0.268739
18.1287	KnChR-3.0-EYFP	1	1	-0.268811
18.2456	KnChR-3.0-EYFP	1	1	-0.26757
18.3626	KnChR-3.0-EYFP	1	1	-0.267282
18.4795	KnChR-3.0-EYFP	1	1	-0.264514
18.5965	KnChR-3.0-EYFP	1	1	-0.265178
18.7135	KnChR-3.0-EYFP	1	1	-0.265874
18.8304	KnChR-3.0-EYFP	1	1	-0.265906
18.9474	KnChR-3.0-EYFP	1	1	-0.265546
19.0643	KnChR-3.0-EYFP	1	1	-0.26573
19.1813	KnChR-3.0-EYFP	1	1	-0.26597
19.2982	KnChR-3.0-EYFP	1	1	-0.264986
19.4152	KnChR-3.0-EYFP	1	1	-0.264834
19.5322	KnChR-3.0-EYFP	1	1	-0.264986
19.6491	KnChR-3.0-EYFP	1	1	-0.263449
19.7661	KnChR-3.0-EYFP	1	1	-0.263009
19.883	KnChR-3.0-EYFP	1	1	-0.263969
0	KnChR-3.0-EYFP	1	2	0
0.116959	KnChR-3.0-EYFP	1	2	-0.0552003
0.233918	KnChR-3.0-EYFP	1	2	-0.0935976
0.350877	KnChR-3.0-EYFP	1	2	-0.123064
0.467836	KnChR-3.0-EYFP	1	2	-0.151532
0.584795	KnChR-3.0-EYFP	1	2	-0.172606
0.701754	KnChR-3.0-EYFP	1	2	-0.194387
0.818713	KnChR-3.0-EYFP	1	2	-0.212288
0.935673	KnChR-3.0-EYFP	1	2	-0.224849
1.05263	KnChR-3.0-EYFP	1	2	-0.237949
1.16959	KnChR-3.0-EYFP	1	2	-0.249007
1.28655	KnChR-3.0-EYFP	1	2	-0.258218
1.40351	KnChR-3.0-EYFP	1	2	-0.267175
1.52047	KnChR-3.0-EYFP	1	2	-0.274298
1.63743	KnChR-3.0-EYFP	1	2	-0.280543
1.75439	KnChR-3.0-EYFP	1	2	-0.285352
1.87135	KnChR-3.0-EYFP	1	2	-0.288321
1.9883	KnChR-3.0-EYFP	1	2	-0.292058
2.10526	KnChR-3.0-EYFP	1	2	-0.295456
2.22222	KnChR-3.0-EYFP	1	2	-0.298167
2.33918	KnChR-3.0-EYFP	1	2	-0.300765
2.45614	KnChR-3.0-EYFP	1	2	-0.302407
2.5731	KnChR-3.0-EYFP	1	2	-0.303528
2.69006	KnChR-3.0-EYFP	1	2	-0.300794
2.80702	KnChR-3.0-EYFP	1	2	-0.303158
2.92398	KnChR-3.0-EYFP	1	2	-0.303088
3.04094	KnChR-3.0-EYFP	1	2	-0.302071
3.15789	KnChR-3.0-EYFP	1	2	-0.302927
3.27485	KnChR-3.0-EYFP	1	2	-0.305234
3.39181	KnChR-3.0-EYFP	1	2	-0.306195
3.50877	KnChR-3.0-EYFP	1	2	-0.305673
3.62573	KnChR-3.0-EYFP	1	2	-0.304243
3.74269	KnChR-3.0-EYFP	1	2	-0.302423
3.85965	KnChR-3.0-EYFP	1	2	-0.299204
3.97661	KnChR-3.0-EYFP	1	2	-0.297222
4.09357	KnChR-3.0-EYFP	1	2	-0.296349
4.21053	KnChR-3.0-EYFP	1	2	-0.296303
4.32749	KnChR-3.0-EYFP	1	2	-0.294269
4.44444	KnChR-3.0-EYFP	1	2	-0.291702
4.5614	KnChR-3.0-EYFP	1	2	-0.289954
4.67836	KnChR-3.0-EYFP	1	2	-0.283773
4.79532	KnChR-3.0-EYFP	1	2	-0.281633
4.91228	KnChR-3.0-EYFP	1	2	-0.27745
5.02924	KnChR-3.0-EYFP	1	2	-0.275658
5.1462	KnChR-3.0-EYFP	1	2	-0.272032
5.26316	KnChR-3.0-EYFP	1	2	-0.269275
5.38012	KnChR-3.0-EYFP	1	2	-0.266416
5.49708	KnChR-3.0-EYFP	1	2	-0.262195
5.61404	KnChR-3.0-EYFP	1	2	-0.258466
5.73099	KnChR-3.0-EYFP	1	2	-0.255322
5.84795	KnChR-3.0-EYFP	1	2	-0.251962
5.96491	KnChR-3.0-EYFP	1	2	-0.248374
6.08187	KnChR-3.0-EYFP	1	2	-0.244657
6.19883	KnChR-3.0-EYFP	1	2	-0.243134
6.31579	KnChR-3.0-EYFP	1	2	-0.237112
6.43275	KnChR-3.0-EYFP	1	2	-0.233645
6.54971	KnChR-3.0-EYFP	1	2	-0.231687
6.66667	KnChR-3.0-EYFP	1	2	-0.227752
6.78363	KnChR-3.0-EYFP	1	2	-0.227491
6.90058	KnChR-3.0-EYFP	1	2	-0.222598
7.01754	KnChR-3.0-EYFP	1	2	-0.219663
7.1345	KnChR-3.0-EYFP	1	2	-0.217114
7.25146	KnChR-3.0-EYFP	1	2	-0.213164
7.36842	KnChR-3.0-EYFP	1	2	-0.209493
7.48538	KnChR-3.0-EYFP	1	2	-0.20597
7.60234	KnChR-3.0-EYFP	1	2	-0.201784
7.7193	KnChR-3.0-EYFP	1	2	-0.198913
7.83626	KnChR-3.0-EYFP	1	2	-0.195369
7.95322	KnChR-3.0-EYFP	1	2	-0.194515
8.07018	KnChR-3.0-EYFP	1	2	-0.19188
8.18713	KnChR-3.0-EYFP	1	2	-0.189815
8.30409	KnChR-3.0-EYFP	1	2	-0.187177
8.42105	KnChR-3.0-EYFP	1	2	-0.184813
8.53801	KnChR-3.0-EYFP	1	2	-0.181027
8.65497	KnChR-3.0-EYFP	1	2	-0.180285
8.77193	KnChR-3.0-EYFP	1	2	-0.177472
8.88889	KnChR-3.0-EYFP	1	2	-0.175736
9.00585	KnChR-3.0-EYFP	1	2	-0.174048
9.12281	KnChR-3.0-EYFP	1	2	-0.171988
9.23977	KnChR-3.0-EYFP	1	2	-0.170277
9.35673	KnChR-3.0-EYFP	1	2	-0.165616
9.47368	KnChR-3.0-EYFP	1	2	-0.164591
9.59064	KnChR-3.0-EYFP	1	2	-0.162116
9.7076	KnChR-3.0-EYFP	1	2	-0.160653
9.82456	KnChR-3.0-EYFP	1	2	-0.156645
9.94152	KnChR-3.0-EYFP	1	2	-0.156388
10.0585	KnChR-3.0-EYFP	1	2	-0.155493
10.1754	KnChR-3.0-EYFP	1	2	-0.153561
10.2924	KnChR-3.0-EYFP	1	2	-0.152289
10.4094	KnChR-3.0-EYFP	1	2	-0.151163
10.5263	KnChR-3.0-EYFP	1	2	-0.150156
10.6433	KnChR-3.0-EYFP	1	2	-0.148143
10.7602	KnChR-3.0-EYFP	1	2	-0.145991
10.8772	KnChR-3.0-EYFP	1	2	-0.144946
10.9942	KnChR-3.0-EYFP	1	2	-0.143494
11.1111	KnChR-3.0-EYFP	1	2	-0.142212
11.2281	KnChR-3.0-EYFP	1	2	-0.137453
11.345	KnChR-3.0-EYFP	1	2	-0.136152
11.462	KnChR-3.0-EYFP	1	2	-0.135847
11.5789	KnChR-3.0-EYFP	1	2	-0.13605
11.6959	KnChR-3.0-EYFP	1	2	-0.135024
11.8129	KnChR-3.0-EYFP	1	2	-0.131543
11.9298	KnChR-3.0-EYFP	1	2	-0.128727
12.0468	KnChR-3.0-EYFP	1	2	-0.129437
12.1637	KnChR-3.0-EYFP	1	2	-0.128129
12.2807	KnChR-3.0-EYFP	1	2	-0.12528
12.3977	KnChR-3.0-EYFP	1	2	-0.126012
12.5146	KnChR-3.0-EYFP	1	2	-0.124625
12.6316	KnChR-3.0-EYFP	1	2	-0.120496
12.7485	KnChR-3.0-EYFP	1	2	-0.120826
12.8655	KnChR-3.0-EYFP	1	2	-0.118274
12.9825	KnChR-3.0-EYFP	1	2	-0.117197
13.0994	KnChR-3.0-EYFP	1	2	-0.117649
13.2164	KnChR-3.0-EYFP	1	2	-0.115542
13.3333	KnChR-3.0-EYFP	1	2	-0.115204
13.4503	KnChR-3.0-EYFP	1	2	-0.113435
13.5673	KnChR-3.0-EYFP	1	2	-0.111155
13.6842	KnChR-3.0-EYFP	1	2	-0.108937
13.8012	KnChR-3.0-EYFP	1	2	-0.109218
13.9181	KnChR-3.0-EYFP	1	2	-0.109644
14.0351	KnChR-3.0-EYFP	1	2	-0.106545
14.152	KnChR-3.0-EYFP	1	2	-0.106175
14.269	KnChR-3.0-EYFP	1	2	-0.103519
14.386	KnChR-3.0-EYFP	1	2	-0.103516
14.5029	KnChR-3.0-EYFP	1	2	-0.10077
14.6199	KnChR-3.0-EYFP	1	2	-0.102329
14.7368	KnChR-3.0-EYFP	1	2	-0.10069
14.8538	KnChR-3.0-EYFP	1	2	-0.10022
14.9708	KnChR-3.0-EYFP	1	2	-0.0981471
15.0877	KnChR-3.0-EYFP	1	2	-0.0985675
15.2047	KnChR-3.0-EYFP	1	2	-0.0970211
15.3216	KnChR-3.0-EYFP	1	2	-0.0953999
15.4386	KnChR-3.0-EYFP	1	2	-0.0950355
15.5556	KnChR-3.0-EYFP	1	2	-0.0934832
15.6725	KnChR-3.0-EYFP	1	2	-0.091911
15.7895	KnChR-3.0-EYFP	1	2	-0.0898974
15.9064	KnChR-3.0-EYFP	1	2	-0.089387
16.0234	KnChR-3.0-EYFP	1	2	-0.0891662
16.1404	KnChR-3.0-EYFP	1	2	-0.0871946
16.2573	KnChR-3.0-EYFP	1	2	-0.0840947
16.3743	KnChR-3.0-EYFP	1	2	-0.0841321
16.4912	KnChR-3.0-EYFP	1	2	-0.0829325
16.6082	KnChR-3.0-EYFP	1	2	-0.0817248
16.7251	KnChR-3.0-EYFP	1	2	-0.0818194
16.8421	KnChR-3.0-EYFP	1	2	-0.0795079
16.9591	KnChR-3.0-EYFP	1	2	-0.0765949
17.076	KnChR-3.0-EYFP	1	2	-0.0768822
17.193	KnChR-3.0-EYFP	1	2	-0.0780444
17.3099	KnChR-3.0-EYFP	1	2	-0.0760611
17.4269	KnChR-3.0-EYFP	1	2	-0.0758835
17.5439	KnChR-3.0-EYFP	1	2	-0.0715514
17.6608	KnChR-3.0-EYFP	1	2	-0.0715829
17.7778	KnChR-3.0-EYFP	1	2	-0.0715876
17.8947	KnChR-3.0-EYFP	1	2	-0.0682225
18.0117	KnChR-3.0-EYFP	1	2	-0.0682658
18.1287	KnChR-3.0-EYFP	1	2	-0.089832
18.2456	KnChR-3.0-EYFP	1	2	-0.058479
18.3626	KnChR-3.0-EYFP	1	2	-0.0663187
18.4795	KnChR-3.0-EYFP	1	2	-0.0654859
18.5965	KnChR-3.0-EYFP	1	2	-0.0627504
18.7135	KnChR-3.0-EYFP	1	2	-0.0613523
18.8304	KnChR-3.0-EYFP	1	2	-0.060356
18.9474	KnChR-3.0-EYFP	1	2	-0.0597708
19.0643	KnChR-3.0-EYFP	1	2	-0.0586121
19.1813	KnChR-3.0-EYFP	1	2	-0.0575177
19.2982	KnChR-3.0-EYFP	1	2	-0.0569804
19.4152	KnChR-3.0-EYFP	1	2	-0.0564571
19.5322	KnChR-3.0-EYFP	1	2	-0.0552471
19.6491	KnChR-3.0-EYFP	1	2	-0.0529414
19.7661	KnChR-3.0-EYFP	1	2	-0.0553323
19.883	KnChR-3.0-EYFP	1	2	-0.0549632
0	KnChR-3.0-EYFP	1	3	0
0.116959	KnChR-3.0-EYFP	1	3	-0.0285118
0.233918	KnChR-3.0-EYFP	1	3	-0.0408034
0.350877	KnChR-3.0-EYFP	1	3	-0.0573053
0.467836	KnChR-3.0-EYFP	1	3	-0.0708661
0.584795	KnChR-3.0-EYFP	1	3	-0.0809447
0.701754	KnChR-3.0-EYFP	1	3	-0.0912082
0.818713	KnChR-3.0-EYFP	1	3	-0.0974587
0.935673	KnChR-3.0-EYFP	1	3	-0.104484
1.05263	KnChR-3.0-EYFP	1	3	-0.108305
1.16959	KnChR-3.0-EYFP	1	3	-0.112391
1.28655	KnChR-3.0-EYFP	1	3	-0.116497
1.40351	KnChR-3.0-EYFP	1	3	-0.12157
1.52047	KnChR-3.0-EYFP	1	3	-0.122562
1.63743	KnChR-3.0-EYFP	1	3	-0.127801
1.75439	KnChR-3.0-EYFP	1	3	-0.129463
1.87135	KnChR-3.0-EYFP	1	3	-0.131225
1.9883	KnChR-3.0-EYFP	1	3	-0.132262
2.10526	KnChR-3.0-EYFP	1	3	-0.132434
2.22222	KnChR-3.0-EYFP	1	3	-0.133853
2.33918	KnChR-3.0-EYFP	1	3	-0.134123
2.45614	KnChR-3.0-EYFP	1	3	-0.131012
2.5731	KnChR-3.0-EYFP	1	3	-0.13007
2.69006	KnChR-3.0-EYFP	1	3	-0.131747
2.80702	KnChR-3.0-EYFP	1	3	-0.157268
2.92398	KnChR-3.0-EYFP	1	3	-0.125581
3.04094	KnChR-3.0-EYFP	1	3	-0.124978
3.15789	KnChR-3.0-EYFP	1	3	-0.125453
3.27485	KnChR-3.0-EYFP	1	3	-0.121866
3.39181	KnChR-3.0-EYFP	1	3	-0.119181
3.50877	KnChR-3.0-EYFP	1	3	-0.104809
3.62573	KnChR-3.0-EYFP	1	3	-0.0919085
3.74269	KnChR-3.0-EYFP	1	3	-0.0999122
3.85965	KnChR-3.0-EYFP	1	3	-0.101204
3.97661	KnChR-3.0-EYFP	1	3	-0.101166
4.09357	KnChR-3.0-EYFP	1	3	-0.0980258
4.21053	KnChR-3.0-EYFP	1	3	-0.0950294
4.32749	KnChR-3.0-EYFP	1	3	-0.0851497
4.44444	KnChR-3.0-EYFP	1	3	-0.0728286
4.5614	KnChR-3.0-EYFP	1	3	-0.0734701
4.67836	KnChR-3.0-EYFP	1	3	-0.070133
4.79532	KnChR-3.0-EYFP	1	3	-0.0546582
4.91228	KnChR-3.0-EYFP	1	3	-0.0587249
5.02924	KnChR-3.0-EYFP	1	3	-0.0607254
5.1462	KnChR-3.0-EYFP	1	3	-0.0607306
5.26316	KnChR-3.0-EYFP	1	3	-0.060319
5.38012	KnChR-3.0-EYFP	1	3	-0.0572811
5.49708	KnChR-3.0-EYFP	1	3	-0.0537401
5.61404	KnChR-3.0-EYFP	1	3	-0.0502716
5.73099	KnChR-3.0-EYFP	1	3	-0.0455237
5.84795	KnChR-3.0-EYFP	1	3	-0.0425515
5.96491	KnChR-3.0-EYFP	1	3	-0.0379298
6.08187	KnChR-3.0-EYFP	1	3	-0.0340135
6.19883	KnChR-3.0-EYFP	1	3	-0.0309186
6.31579	KnChR-3.0-EYFP	1	3	-0.0257643
6.43275	KnChR-3.0-EYFP	1	3	-0.0223011
6.54971	KnChR-3.0-EYFP	1	3	-0.0188949
6.66667	KnChR-3.0-EYFP	1	3	-0.0132185
6.78363	KnChR-3.0-EYFP	1	3	-0.00782733
6.90058	KnChR-3.0-EYFP	1	3	-0.00313128
7.01754	KnChR-3.0-EYFP	1	3	0.000420155
7.1345	KnChR-3.0-EYFP	1	3	0.00552426
7.25146	KnChR-3.0-EYFP	1	3	0.00877484
7.36842	KnChR-3.0-EYFP	1	3	0.0132098
7.48538	KnChR-3.0-EYFP	1	3	0.0165866
7.60234	KnChR-3.0-EYFP	1	3	0.0226694
7.7193	KnChR-3.0-EYFP	1	3	0.0273447
7.83626	KnChR-3.0-EYFP	1	3	0.0307474
7.95322	KnChR-3.0-EYFP	1	3	0.0368699
8.07018	KnChR-3.0-EYFP	1	3	0.0411527
8.18713	KnChR-3.0-EYFP	1	3	0.0464781
8.30409	KnChR-3.0-EYFP	1	3	0.0515771
8.42105	KnChR-3.0-EYFP	1	3	0.0565601
8.53801	KnChR-3.0-EYFP	1	3	0.0601928
8.65497	KnChR-3.0-EYFP	1	3	0.0661649
8.77193	KnChR-3.0-EYFP	1	3	0.069253
8.88889	KnChR-3.0-EYFP	1	3	0.075474
9.00585	KnChR-3.0-EYFP	1	3	0.0811435
9.12281	KnChR-3.0-EYFP	1	3	0.0842852
9.23977	KnChR-3.0-EYFP	1	3	0.0909402
9.35673	KnChR-3.0-EYFP	1	3	0.0934473
9.47368	KnChR-3.0-EYFP	1	3	0.0961204
9.59064	KnChR-3.0-EYFP	1	3	0.101169
9.7076	KnChR-3.0-EYFP	1	3	0.103538
9.82456	KnChR-3.0-EYFP	1	3	0.109709
9.94152	KnChR-3.0-EYFP	1	3	0.114135
10.0585	KnChR-3.0-EYFP	1	3	0.119858
10.1754	KnChR-3.0-EYFP	1	3	0.121401
10.2924	KnChR-3.0-EYFP	1	3	0.130583
10.4094	KnChR-3.0-EYFP	1	3	0.13395
10.5263	KnChR-3.0-EYFP	1	3	0.138758
10.6433	KnChR-3.0-EYFP	1	3	0.142842
10.7602	KnChR-3.0-EYFP	1	3	0.142685
10.8772	KnChR-3.0-EYFP	1	3	0.147016
10.9942	KnChR-3.0-EYFP	1	3	0.151045
11.1111	KnChR-3.0-EYFP	1	3	0.153702
11.2281	KnChR-3.0-EYFP	1	3	0.159023
11.345	KnChR-3.0-EYFP	1	3	0.161749
11.462	KnChR-3.0-EYFP	1	3	0.16631
11.5789	KnChR-3.0-EYFP	1	3	0.169245
11.6959	KnChR-3.0-EYFP	1	3	0.172047
11.8129	KnChR-3.0-EYFP	1	3	0.173076
11.9298	KnChR-3.0-EYFP	1	3	0.176887
12.0468	KnChR-3.0-EYFP	1	3	0.179458
12.1637	KnChR-3.0-EYFP	1	3	0.1937
12.2807	KnChR-3.0-EYFP	1	3	0.189798
12.3977	KnChR-3.0-EYFP	1	3	0.195178
12.5146	KnChR-3.0-EYFP	1	3	0.196596
12.6316	KnChR-3.0-EYFP	1	3	0.201254
12.7485	KnChR-3.0-EYFP	1	3	0.206045
12.8655	KnChR-3.0-EYFP	1	3	0.210295
12.9825	KnChR-3.0-EYFP	1	3	0.212225
13.0994	KnChR-3.0-EYFP	1	3	0.215055
13.2164	KnChR-3.0-EYFP	1	3	0.217884
13.3333	KnChR-3.0-EYFP	1	3	0.219592
13.4503	KnChR-3.0-EYFP	1	3	0.224556
13.5673	KnChR-3.0-EYFP	1	3	0.226827
13.6842	KnChR-3.0-EYFP	1	3	0.229026
13.8012	KnChR-3.0-EYFP	1	3	0.231428
13.9181	KnChR-3.0-EYFP	1	3	0.23538
14.0351	KnChR-3.0-EYFP	1	3	0.236248
14.152	KnChR-3.0-EYFP	1	3	0.239193
14.269	KnChR-3.0-EYFP	1	3	0.240043
14.386	KnChR-3.0-EYFP	1	3	0.242948
14.5029	KnChR-3.0-EYFP	1	3	0.243685
14.6199	KnChR-3.0-EYFP	1	3	0.246251
14.7368	KnChR-3.0-EYFP	1	3	0.248528
14.8538	KnChR-3.0-EYFP	1	3	0.251576
14.9708	KnChR-3.0-EYFP	1	3	0.257093
15.0877	KnChR-3.0-EYFP	1	3	0.25474
15.2047	KnChR-3.0-EYFP	1	3	0.257237
15.3216	KnChR-3.0-EYFP	1	3	0.260882
15.4386	KnChR-3.0-EYFP	1	3	0.261191
15.5556	KnChR-3.0-EYFP	1	3	0.262208
15.6725	KnChR-3.0-EYFP	1	3	0.265763
15.7895	KnChR-3.0-EYFP	1	3	0.26877
15.9064	KnChR-3.0-EYFP	1	3	0.270452
16.0234	KnChR-3.0-EYFP	1	3	0.275613
16.1404	KnChR-3.0-EYFP	1	3	0.277333
16.2573	KnChR-3.0-EYFP	1	3	0.28316
16.3743	KnChR-3.0-EYFP	1	3	0.284433
16.4912	KnChR-3.0-EYFP	1	3	0.285095
16.6082	KnChR-3.0-EYFP	1	3	0.286563
16.7251	KnChR-3.0-EYFP	1	3	0.286973
16.8421	KnChR-3.0-EYFP	1	3	0.289715
16.9591	KnChR-3.0-EYFP	1	3	0.293922
17.076	KnChR-3.0-EYFP	1	3	0.29531
17.193	KnChR-3.0-EYFP	1	3	0.294067
17.3099	KnChR-3.0-EYFP	1	3	0.295974
17.4269	KnChR-3.0-EYFP	1	3	0.299536
17.5439	KnChR-3.0-EYFP	1	3	0.302859
17.6608	KnChR-3.0-EYFP	1	3	0.302461
17.7778	KnChR-3.0-EYFP	1	3	0.304087
17.8947	KnChR-3.0-EYFP	1	3	0.307031
18.0117	KnChR-3.0-EYFP	1	3	0.310631
18.1287	KnChR-3.0-EYFP	1	3	0.309632
18.2456	KnChR-3.0-EYFP	1	3	0.310597
18.3626	KnChR-3.0-EYFP	1	3	0.312644
18.4795	KnChR-3.0-EYFP	1	3	0.317459
18.5965	KnChR-3.0-EYFP	1	3	0.317514
18.7135	KnChR-3.0-EYFP	1	3	0.31722
18.8304	KnChR-3.0-EYFP	1	3	0.317433
18.9474	KnChR-3.0-EYFP	1	3	0.32122
19.0643	KnChR-3.0-EYFP	1	3	0.322017
19.1813	KnChR-3.0-EYFP	1	3	0.322648
19.2982	KnChR-3.0-EYFP	1	3	0.329948
19.4152	KnChR-3.0-EYFP	1	3	0.329306
19.5322	KnChR-3.0-EYFP	1	3	0.327811
19.6491	KnChR-3.0-EYFP	1	3	0.329497
19.7661	KnChR-3.0-EYFP	1	3	0.331112
19.883	KnChR-3.0-EYFP	1	3	0.333102
0	KnChR-3.0-EYFP	2	1	0
0.116959	KnChR-3.0-EYFP	2	1	-0.0310259
0.233918	KnChR-3.0-EYFP	2	1	-0.0646508
0.350877	KnChR-3.0-EYFP	2	1	-0.0920764
0.467836	KnChR-3.0-EYFP	2	1	-0.118493
0.584795	KnChR-3.0-EYFP	2	1	-0.141008
0.701754	KnChR-3.0-EYFP	2	1	-0.160659
0.818713	KnChR-3.0-EYFP	2	1	-0.178962
0.935673	KnChR-3.0-EYFP	2	1	-0.193768
1.05263	KnChR-3.0-EYFP	2	1	-0.208111
1.16959	KnChR-3.0-EYFP	2	1	-0.220767
1.28655	KnChR-3.0-EYFP	2	1	-0.232083
1.40351	KnChR-3.0-EYFP	2	1	-0.242567
1.52047	KnChR-3.0-EYFP	2	1	-0.251601
1.63743	KnChR-3.0-EYFP	2	1	-0.258184
1.75439	KnChR-3.0-EYFP	2	1	-0.265553
1.87135	KnChR-3.0-EYFP	2	1	-0.270862
1.9883	KnChR-3.0-EYFP	2	1	-0.277238
2.10526	KnChR-3.0-EYFP	2	1	-0.28195
2.22222	KnChR-3.0-EYFP	2	1	-0.285859
2.33918	KnChR-3.0-EYFP	2	1	-0.288414
2.45614	KnChR-3.0-EYFP	2	1	-0.292
2.5731	KnChR-3.0-EYFP	2	1	-0.294555
2.69006	KnChR-3.0-EYFP	2	1	-0.295136
2.80702	KnChR-3.0-EYFP	2	1	-0.298022
2.92398	KnChR-3.0-EYFP	2	1	-0.299753
3.04094	KnChR-3.0-EYFP	2	1	-0.30029
3.15789	KnChR-3.0-EYFP	2	1	-0.301439
3.27485	KnChR-3.0-EYFP	2	1	-0.301365
3.39181	KnChR-3.0-EYFP	2	1	-0.300842
3.50877	KnChR-3.0-EYFP	2	1	-0.300835
3.62573	KnChR-3.0-EYFP	2	1	-0.300894
3.74269	KnChR-3.0-EYFP	2	1	-0.300621
3.85965	KnChR-3.0-EYFP	2	1	-0.300239
3.97661	KnChR-3.0-EYFP	2	1	-0.299944
4.09357	KnChR-3.0-EYFP	2	1	-0.297507
4.21053	KnChR-3.0-EYFP	2	1	-0.297669
4.32749	KnChR-3.0-EYFP	2	1	-0.296896
4.44444	KnChR-3.0-EYFP	2	1	-0.296903
4.5614	KnChR-3.0-EYFP	2	1	-0.294879
4.67836	KnChR-3.0-EYFP	2	1	-0.294989
4.79532	KnChR-3.0-EYFP	2	1	-0.294113
4.91228	KnChR-3.0-EYFP	2	1	-0.291654
5.02924	KnChR-3.0-EYFP	2	1	-0.290468
5.1462	KnChR-3.0-EYFP	2	1	-0.289703
5.26316	KnChR-3.0-EYFP	2	1	-0.287656
5.38012	KnChR-3.0-EYFP	2	1	-0.285911
5.49708	KnChR-3.0-EYFP	2	1	-0.285145
5.61404	KnChR-3.0-EYFP	2	1	-0.283702
5.73099	KnChR-3.0-EYFP	2	1	-0.282568
5.84795	KnChR-3.0-EYFP	2	1	-0.283783
5.96491	KnChR-3.0-EYFP	2	1	-0.281398
6.08187	KnChR-3.0-EYFP	2	1	-0.280249
6.19883	KnChR-3.0-EYFP	2	1	-0.27832
6.31579	KnChR-3.0-EYFP	2	1	-0.276936
6.43275	KnChR-3.0-EYFP	2	1	-0.274551
6.54971	KnChR-3.0-EYFP	2	1	-0.273866
6.66667	KnChR-3.0-EYFP	2	1	-0.272577
6.78363	KnChR-3.0-EYFP	2	1	-0.269603
6.90058	KnChR-3.0-EYFP	2	1	-0.269353
7.01754	KnChR-3.0-EYFP	2	1	-0.267505
7.1345	KnChR-3.0-EYFP	2	1	-0.268579
7.25146	KnChR-3.0-EYFP	2	1	-0.267917
7.36842	KnChR-3.0-EYFP	2	1	-0.266187
7.48538	KnChR-3.0-EYFP	2	1	-0.265598
7.60234	KnChR-3.0-EYFP	2	1	-0.264125
7.7193	KnChR-3.0-EYFP	2	1	-0.262903
7.83626	KnChR-3.0-EYFP	2	1	-0.263028
7.95322	KnChR-3.0-EYFP	2	1	-0.260974
8.07018	KnChR-3.0-EYFP	2	1	-0.259789
8.18713	KnChR-3.0-EYFP	2	1	-0.257845
8.30409	KnChR-3.0-EYFP	2	1	-0.257138
8.42105	KnChR-3.0-EYFP	2	1	-0.254708
8.53801	KnChR-3.0-EYFP	2	1	-0.254576
8.65497	KnChR-3.0-EYFP	2	1	-0.253133
8.77193	KnChR-3.0-EYFP	2	1	-0.252212
8.88889	KnChR-3.0-EYFP	2	1	-0.252131
9.00585	KnChR-3.0-EYFP	2	1	-0.25071
9.12281	KnChR-3.0-EYFP	2	1	-0.249864
9.23977	KnChR-3.0-EYFP	2	1	-0.251064
9.35673	KnChR-3.0-EYFP	2	1	-0.250158
9.47368	KnChR-3.0-EYFP	2	1	-0.250225
9.59064	KnChR-3.0-EYFP	2	1	-0.248399
9.7076	KnChR-3.0-EYFP	2	1	-0.248332
9.82456	KnChR-3.0-EYFP	2	1	-0.247073
9.94152	KnChR-3.0-EYFP	2	1	-0.245697
10.0585	KnChR-3.0-EYFP	2	1	-0.243392
10.1754	KnChR-3.0-EYFP	2	1	-0.241323
10.2924	KnChR-3.0-EYFP	2	1	-0.245012
10.4094	KnChR-3.0-EYFP	2	1	-0.242376
10.5263	KnChR-3.0-EYFP	2	1	-0.242251
10.6433	KnChR-3.0-EYFP	2	1	-0.240668
10.7602	KnChR-3.0-EYFP	2	1	-0.24041
10.8772	KnChR-3.0-EYFP	2	1	-0.239851
10.9942	KnChR-3.0-EYFP	2	1	-0.239475
11.1111	KnChR-3.0-EYFP	2	1	-0.239181
11.2281	KnChR-3.0-EYFP	2	1	-0.237907
11.345	KnChR-3.0-EYFP	2	1	-0.238032
11.462	KnChR-3.0-EYFP	2	1	-0.236574
11.5789	KnChR-3.0-EYFP	2	1	-0.237001
11.6959	KnChR-3.0-EYFP	2	1	-0.236412
11.8129	KnChR-3.0-EYFP	2	1	-0.236398
11.9298	KnChR-3.0-EYFP	2	1	-0.2367
12.0468	KnChR-3.0-EYFP	2	1	-0.234903
12.1637	KnChR-3.0-EYFP	2	1	-0.233283
12.2807	KnChR-3.0-EYFP	2	1	-0.232002
12.3977	KnChR-3.0-EYFP	2	1	-0.232761
12.5146	KnChR-3.0-EYFP	2	1	-0.233202
12.6316	KnChR-3.0-EYFP	2	1	-0.231759
12.7485	KnChR-3.0-EYFP	2	1	-0.231671
12.8655	KnChR-3.0-EYFP	2	1	-0.230758
12.9825	KnChR-3.0-EYFP	2	1	-0.231965
13.0994	KnChR-3.0-EYFP	2	1	-0.230294
13.2164	KnChR-3.0-EYFP	2	1	-0.231295
13.3333	KnChR-3.0-EYFP	2	1	-0.229889
13.4503	KnChR-3.0-EYFP	2	1	-0.229307
13.5673	KnChR-3.0-EYFP	2	1	-0.228718
13.6842	KnChR-3.0-EYFP	2	1	-0.228056
13.8012	KnChR-3.0-EYFP	2	1	-0.225788
13.9181	KnChR-3.0-EYFP	2	1	-0.227128
14.0351	KnChR-3.0-EYFP	2	1	-0.226326
14.152	KnChR-3.0-EYFP	2	1	-0.226708
14.269	KnChR-3.0-EYFP	2	1	-0.225788
14.386	KnChR-3.0-EYFP	2	1	-0.226024
14.5029	KnChR-3.0-EYFP	2	1	-0.226171
14.6199	KnChR-3.0-EYFP	2	1	-0.224809
14.7368	KnChR-3.0-EYFP	2	1	-0.225472
14.8538	KnChR-3.0-EYFP	2	1	-0.224308
14.9708	KnChR-3.0-EYFP	2	1	-0.223808
15.0877	KnChR-3.0-EYFP	2	1	-0.222814
15.2047	KnChR-3.0-EYFP	2	1	-0.22221
15.3216	KnChR-3.0-EYFP	2	1	-0.220355
15.4386	KnChR-3.0-EYFP	2	1	-0.220009
15.5556	KnChR-3.0-EYFP	2	1	-0.228424
15.6725	KnChR-3.0-EYFP	2	1	-0.233092
15.7895	KnChR-3.0-EYFP	2	1	-0.211586
15.9064	KnChR-3.0-EYFP	2	1	-0.216821
16.0234	KnChR-3.0-EYFP	2	1	-0.216445
16.1404	KnChR-3.0-EYFP	2	1	-0.2202
16.2573	KnChR-3.0-EYFP	2	1	-0.221371
16.3743	KnChR-3.0-EYFP	2	1	-0.220818
16.4912	KnChR-3.0-EYFP	2	1	-0.221761
16.6082	KnChR-3.0-EYFP	2	1	-0.222203
16.7251	KnChR-3.0-EYFP	2	1	-0.223263
16.8421	KnChR-3.0-EYFP	2	1	-0.224087
16.9591	KnChR-3.0-EYFP	2	1	-0.225089
17.076	KnChR-3.0-EYFP	2	1	-0.224264
17.193	KnChR-3.0-EYFP	2	1	-0.222446
17.3099	KnChR-3.0-EYFP	2	1	-0.221967
17.4269	KnChR-3.0-EYFP	2	1	-0.223049
17.5439	KnChR-3.0-EYFP	2	1	-0.222593
17.6608	KnChR-3.0-EYFP	2	1	-0.223918
17.7778	KnChR-3.0-EYFP	2	1	-0.222659
17.8947	KnChR-3.0-EYFP	2	1	-0.223535
18.0117	KnChR-3.0-EYFP	2	1	-0.223403
18.1287	KnChR-3.0-EYFP	2	1	-0.223123
18.2456	KnChR-3.0-EYFP	2	1	-0.222387
18.3626	KnChR-3.0-EYFP	2	1	-0.222453
18.4795	KnChR-3.0-EYFP	2	1	-0.22179
18.5965	KnChR-3.0-EYFP	2	1	-0.221834
18.7135	KnChR-3.0-EYFP	2	1	-0.220399
18.8304	KnChR-3.0-EYFP	2	1	-0.220561
18.9474	KnChR-3.0-EYFP	2	1	-0.220171
19.0643	KnChR-3.0-EYFP	2	1	-0.219802
19.1813	KnChR-3.0-EYFP	2	1	-0.218786
19.2982	KnChR-3.0-EYFP	2	1	-0.218669
19.4152	KnChR-3.0-EYFP	2	1	-0.219287
19.5322	KnChR-3.0-EYFP	2	1	-0.219692
19.6491	KnChR-3.0-EYFP	2	1	-0.221341
19.7661	KnChR-3.0-EYFP	2	1	-0.220171
19.883	KnChR-3.0-EYFP	2	1	-0.222357
0	KnChR-3.0-EYFP	2	2	0
0.116959	KnChR-3.0-EYFP	2	2	-0.021491
0.233918	KnChR-3.0-EYFP	2	2	-0.0641684
0.350877	KnChR-3.0-EYFP	2	2	-0.101494
0.467836	KnChR-3.0-EYFP	2	2	-0.133533
0.584795	KnChR-3.0-EYFP	2	2	-0.159725
0.701754	KnChR-3.0-EYFP	2	2	-0.183201
0.818713	KnChR-3.0-EYFP	2	2	-0.204041
0.935673	KnChR-3.0-EYFP	2	2	-0.220394
1.05263	KnChR-3.0-EYFP	2	2	-0.236245
1.16959	KnChR-3.0-EYFP	2	2	-0.249222
1.28655	KnChR-3.0-EYFP	2	2	-0.260848
1.40351	KnChR-3.0-EYFP	2	2	-0.270606
1.52047	KnChR-3.0-EYFP	2	2	-0.279902
1.63743	KnChR-3.0-EYFP	2	2	-0.289421
1.75439	KnChR-3.0-EYFP	2	2	-0.296058
1.87135	KnChR-3.0-EYFP	2	2	-0.301632
1.9883	KnChR-3.0-EYFP	2	2	-0.306704
2.10526	KnChR-3.0-EYFP	2	2	-0.311505
2.22222	KnChR-3.0-EYFP	2	2	-0.314988
2.33918	KnChR-3.0-EYFP	2	2	-0.31787
2.45614	KnChR-3.0-EYFP	2	2	-0.320933
2.5731	KnChR-3.0-EYFP	2	2	-0.320949
2.69006	KnChR-3.0-EYFP	2	2	-0.322752
2.80702	KnChR-3.0-EYFP	2	2	-0.324284
2.92398	KnChR-3.0-EYFP	2	2	-0.325239
3.04094	KnChR-3.0-EYFP	2	2	-0.325577
3.15789	KnChR-3.0-EYFP	2	2	-0.326054
3.27485	KnChR-3.0-EYFP	2	2	-0.325371
3.39181	KnChR-3.0-EYFP	2	2	-0.325643
3.50877	KnChR-3.0-EYFP	2	2	-0.325223
3.62573	KnChR-3.0-EYFP	2	2	-0.327191
3.74269	KnChR-3.0-EYFP	2	2	-0.327075
3.85965	KnChR-3.0-EYFP	2	2	-0.325593
3.97661	KnChR-3.0-EYFP	2	2	-0.324416
4.09357	KnChR-3.0-EYFP	2	2	-0.322736
4.21053	KnChR-3.0-EYFP	2	2	-0.321583
4.32749	KnChR-3.0-EYFP	2	2	-0.319846
4.44444	KnChR-3.0-EYFP	2	2	-0.318306
4.5614	KnChR-3.0-EYFP	2	2	-0.316939
4.67836	KnChR-3.0-EYFP	2	2	-0.314535
4.79532	KnChR-3.0-EYFP	2	2	-0.311785
4.91228	KnChR-3.0-EYFP	2	2	-0.309891
5.02924	KnChR-3.0-EYFP	2	2	-0.307948
5.1462	KnChR-3.0-EYFP	2	2	-0.306918
5.26316	KnChR-3.0-EYFP	2	2	-0.303831
5.38012	KnChR-3.0-EYFP	2	2	-0.298182
5.49708	KnChR-3.0-EYFP	2	2	-0.298437
5.61404	KnChR-3.0-EYFP	2	2	-0.295753
5.73099	KnChR-3.0-EYFP	2	2	-0.293958
5.84795	KnChR-3.0-EYFP	2	2	-0.290499
5.96491	KnChR-3.0-EYFP	2	2	-0.287478
6.08187	KnChR-3.0-EYFP	2	2	-0.28523
6.19883	KnChR-3.0-EYFP	2	2	-0.281952
6.31579	KnChR-3.0-EYFP	2	2	-0.279853
6.43275	KnChR-3.0-EYFP	2	2	-0.278239
6.54971	KnChR-3.0-EYFP	2	2	-0.275695
6.66667	KnChR-3.0-EYFP	2	2	-0.271248
6.78363	KnChR-3.0-EYFP	2	2	-0.272566
6.90058	KnChR-3.0-EYFP	2	2	-0.267106
7.01754	KnChR-3.0-EYFP	2	2	-0.264348
7.1345	KnChR-3.0-EYFP	2	2	-0.261565
7.25146	KnChR-3.0-EYFP	2	2	-0.258897
7.36842	KnChR-3.0-EYFP	2	2	-0.256913
7.48538	KnChR-3.0-EYFP	2	2	-0.257571
7.60234	KnChR-3.0-EYFP	2	2	-0.255118
7.7193	KnChR-3.0-EYFP	2	2	-0.251182
7.83626	KnChR-3.0-EYFP	2	2	-0.249321
7.95322	KnChR-3.0-EYFP	2	2	-0.246801
8.07018	KnChR-3.0-EYFP	2	2	-0.243631
8.18713	KnChR-3.0-EYFP	2	2	-0.243557
8.30409	KnChR-3.0-EYFP	2	2	-0.241045
8.42105	KnChR-3.0-EYFP	2	2	-0.237776
8.53801	KnChR-3.0-EYFP	2	2	-0.239152
8.65497	KnChR-3.0-EYFP	2	2	-0.237241
8.77193	KnChR-3.0-EYFP	2	2	-0.235282
8.88889	KnChR-3.0-EYFP	2	2	-0.233165
9.00585	KnChR-3.0-EYFP	2	2	-0.228793
9.12281	KnChR-3.0-EYFP	2	2	-0.227797
9.23977	KnChR-3.0-EYFP	2	2	-0.22615
9.35673	KnChR-3.0-EYFP	2	2	-0.224651
9.47368	KnChR-3.0-EYFP	2	2	-0.222692
9.59064	KnChR-3.0-EYFP	2	2	-0.22074
9.7076	KnChR-3.0-EYFP	2	2	-0.219892
9.82456	KnChR-3.0-EYFP	2	2	-0.214803
9.94152	KnChR-3.0-EYFP	2	2	-0.213165
10.0585	KnChR-3.0-EYFP	2	2	-0.211386
10.1754	KnChR-3.0-EYFP	2	2	-0.211674
10.2924	KnChR-3.0-EYFP	2	2	-0.206693
10.4094	KnChR-3.0-EYFP	2	2	-0.210291
10.5263	KnChR-3.0-EYFP	2	2	-0.209138
10.6433	KnChR-3.0-EYFP	2	2	-0.208076
10.7602	KnChR-3.0-EYFP	2	2	-0.206001
10.8772	KnChR-3.0-EYFP	2	2	-0.204305
10.9942	KnChR-3.0-EYFP	2	2	-0.203341
11.1111	KnChR-3.0-EYFP	2	2	-0.202707
11.2281	KnChR-3.0-EYFP	2	2	-0.201283
11.345	KnChR-3.0-EYFP	2	2	-0.200822
11.462	KnChR-3.0-EYFP	2	2	-0.19957
11.5789	KnChR-3.0-EYFP	2	2	-0.19738
11.6959	KnChR-3.0-EYFP	2	2	-0.197396
11.8129	KnChR-3.0-EYFP	2	2	-0.195708
11.9298	KnChR-3.0-EYFP	2	2	-0.194284
12.0468	KnChR-3.0-EYFP	2	2	-0.192991
12.1637	KnChR-3.0-EYFP	2	2	-0.192036
12.2807	KnChR-3.0-EYFP	2	2	-0.189837
12.3977	KnChR-3.0-EYFP	2	2	-0.188783
12.5146	KnChR-3.0-EYFP	2	2	-0.187087
12.6316	KnChR-3.0-EYFP	2	2	-0.187944
12.7485	KnChR-3.0-EYFP	2	2	-0.186387
12.8655	KnChR-3.0-EYFP	2	2	-0.186412
12.9825	KnChR-3.0-EYFP	2	2	-0.184922
13.0994	KnChR-3.0-EYFP	2	2	-0.18344
13.2164	KnChR-3.0-EYFP	2	2	-0.181776
13.3333	KnChR-3.0-EYFP	2	2	-0.181052
13.4503	KnChR-3.0-EYFP	2	2	-0.178985
13.5673	KnChR-3.0-EYFP	2	2	-0.179421
13.6842	KnChR-3.0-EYFP	2	2	-0.178022
13.8012	KnChR-3.0-EYFP	2	2	-0.175765
13.9181	KnChR-3.0-EYFP	2	2	-0.176951
14.0351	KnChR-3.0-EYFP	2	2	-0.174423
14.152	KnChR-3.0-EYFP	2	2	-0.171986
14.269	KnChR-3.0-EYFP	2	2	-0.171525
14.386	KnChR-3.0-EYFP	2	2	-0.17043
14.5029	KnChR-3.0-EYFP	2	2	-0.170454
14.6199	KnChR-3.0-EYFP	2	2	-0.169829
14.7368	KnChR-3.0-EYFP	2	2	-0.166765
14.8538	KnChR-3.0-EYFP	2	2	-0.166617
14.9708	KnChR-3.0-EYFP	2	2	-0.167029
15.0877	KnChR-3.0-EYFP	2	2	-0.16684
15.2047	KnChR-3.0-EYFP	2	2	-0.166658
15.3216	KnChR-3.0-EYFP	2	2	-0.167078
15.4386	KnChR-3.0-EYFP	2	2	-0.165835
15.5556	KnChR-3.0-EYFP	2	2	-0.165893
15.6725	KnChR-3.0-EYFP	2	2	-0.164246
15.7895	KnChR-3.0-EYFP	2	2	-0.165448
15.9064	KnChR-3.0-EYFP	2	2	-0.16362
16.0234	KnChR-3.0-EYFP	2	2	-0.163101
16.1404	KnChR-3.0-EYFP	2	2	-0.163357
16.2573	KnChR-3.0-EYFP	2	2	-0.161323
16.3743	KnChR-3.0-EYFP	2	2	-0.160886
16.4912	KnChR-3.0-EYFP	2	2	-0.160483
16.6082	KnChR-3.0-EYFP	2	2	-0.160746
16.7251	KnChR-3.0-EYFP	2	2	-0.158927
16.8421	KnChR-3.0-EYFP	2	2	-0.160499
16.9591	KnChR-3.0-EYFP	2	2	-0.160401
17.076	KnChR-3.0-EYFP	2	2	-0.160244
17.193	KnChR-3.0-EYFP	2	2	-0.155608
17.3099	KnChR-3.0-EYFP	2	2	-0.156638
17.4269	KnChR-3.0-EYFP	2	2	-0.154274
17.5439	KnChR-3.0-EYFP	2	2	-0.156094
17.6608	KnChR-3.0-EYFP	2	2	-0.154818
17.7778	KnChR-3.0-EYFP	2	2	-0.153451
17.8947	KnChR-3.0-EYFP	2	2	-0.152158
18.0117	KnChR-3.0-EYFP	2	2	-0.15266
18.1287	KnChR-3.0-EYFP	2	2	-0.151409
18.2456	KnChR-3.0-EYFP	2	2	-0.150964
18.3626	KnChR-3.0-EYFP	2	2	-0.150791
18.4795	KnChR-3.0-EYFP	2	2	-0.150734
18.5965	KnChR-3.0-EYFP	2	2	-0.151812
18.7135	KnChR-3.0-EYFP	2	2	-0.150396
18.8304	KnChR-3.0-EYFP	2	2	-0.151047
18.9474	KnChR-3.0-EYFP	2	2	-0.149993
19.0643	KnChR-3.0-EYFP	2	2	-0.149795
19.1813	KnChR-3.0-EYFP	2	2	-0.14935
19.2982	KnChR-3.0-EYFP	2	2	-0.149729
19.4152	KnChR-3.0-EYFP	2	2	-0.148848
19.5322	KnChR-3.0-EYFP	2	2	-0.149359
19.6491	KnChR-3.0-EYFP	2	2	-0.152471
19.7661	KnChR-3.0-EYFP	2	2	-0.149746
19.883	KnChR-3.0-EYFP	2	2	-0.149136
0	KnChR-3.0-EYFP	2	3	0
0.116959	KnChR-3.0-EYFP	2	3	-0.0662064
0.233918	KnChR-3.0-EYFP	2	3	-0.102718
0.350877	KnChR-3.0-EYFP	2	3	-0.132037
0.467836	KnChR-3.0-EYFP	2	3	-0.157829
0.584795	KnChR-3.0-EYFP	2	3	-0.176924
0.701754	KnChR-3.0-EYFP	2	3	-0.196541
0.818713	KnChR-3.0-EYFP	2	3	-0.21113
0.935673	KnChR-3.0-EYFP	2	3	-0.224781
1.05263	KnChR-3.0-EYFP	2	3	-0.235657
1.16959	KnChR-3.0-EYFP	2	3	-0.246218
1.28655	KnChR-3.0-EYFP	2	3	-0.25433
1.40351	KnChR-3.0-EYFP	2	3	-0.261322
1.52047	KnChR-3.0-EYFP	2	3	-0.267692
1.63743	KnChR-3.0-EYFP	2	3	-0.270789
1.75439	KnChR-3.0-EYFP	2	3	-0.277244
1.87135	KnChR-3.0-EYFP	2	3	-0.281313
1.9883	KnChR-3.0-EYFP	2	3	-0.2849
2.10526	KnChR-3.0-EYFP	2	3	-0.286784
2.22222	KnChR-3.0-EYFP	2	3	-0.2896
2.33918	KnChR-3.0-EYFP	2	3	-0.291542
2.45614	KnChR-3.0-EYFP	2	3	-0.293556
2.5731	KnChR-3.0-EYFP	2	3	-0.292564
2.69006	KnChR-3.0-EYFP	2	3	-0.295486
2.80702	KnChR-3.0-EYFP	2	3	-0.295924
2.92398	KnChR-3.0-EYFP	2	3	-0.296312
3.04094	KnChR-3.0-EYFP	2	3	-0.295331
3.15789	KnChR-3.0-EYFP	2	3	-0.293653
3.27485	KnChR-3.0-EYFP	2	3	-0.293543
3.39181	KnChR-3.0-EYFP	2	3	-0.292311
3.50877	KnChR-3.0-EYFP	2	3	-0.291877
3.62573	KnChR-3.0-EYFP	2	3	-0.291516
3.74269	KnChR-3.0-EYFP	2	3	-0.289715
3.85965	KnChR-3.0-EYFP	2	3	-0.287307
3.97661	KnChR-3.0-EYFP	2	3	-0.285342
4.09357	KnChR-3.0-EYFP	2	3	-0.282889
4.21053	KnChR-3.0-EYFP	2	3	-0.281477
4.32749	KnChR-3.0-EYFP	2	3	-0.279271
4.44444	KnChR-3.0-EYFP	2	3	-0.276715
4.5614	KnChR-3.0-EYFP	2	3	-0.272441
4.67836	KnChR-3.0-EYFP	2	3	-0.270743
4.79532	KnChR-3.0-EYFP	2	3	-0.268837
4.91228	KnChR-3.0-EYFP	2	3	-0.266253
5.02924	KnChR-3.0-EYFP	2	3	-0.262387
5.1462	KnChR-3.0-EYFP	2	3	-0.259513
5.26316	KnChR-3.0-EYFP	2	3	-0.256492
5.38012	KnChR-3.0-EYFP	2	3	-0.253471
5.49708	KnChR-3.0-EYFP	2	3	-0.246625
5.61404	KnChR-3.0-EYFP	2	3	-0.24379
5.73099	KnChR-3.0-EYFP	2	3	-0.241082
5.84795	KnChR-3.0-EYFP	2	3	-0.238706
5.96491	KnChR-3.0-EYFP	2	3	-0.234427
6.08187	KnChR-3.0-EYFP	2	3	-0.230904
6.19883	KnChR-3.0-EYFP	2	3	-0.22358
6.31579	KnChR-3.0-EYFP	2	3	-0.222178
6.43275	KnChR-3.0-EYFP	2	3	-0.221605
6.54971	KnChR-3.0-EYFP	2	3	-0.216987
6.66667	KnChR-3.0-EYFP	2	3	-0.211373
6.78363	KnChR-3.0-EYFP	2	3	-0.207055
6.90058	KnChR-3.0-EYFP	2	3	-0.205251
7.01754	KnChR-3.0-EYFP	2	3	-0.200976
7.1345	KnChR-3.0-EYFP	2	3	-0.197221
7.25146	KnChR-3.0-EYFP	2	3	-0.188429
7.36842	KnChR-3.0-EYFP	2	3	-0.229842
7.48538	KnChR-3.0-EYFP	2	3	-0.175623
7.60234	KnChR-3.0-EYFP	2	3	-0.172186
7.7193	KnChR-3.0-EYFP	2	3	-0.170026
7.83626	KnChR-3.0-EYFP	2	3	-0.164733
7.95322	KnChR-3.0-EYFP	2	3	-0.162718
8.07018	KnChR-3.0-EYFP	2	3	-0.157294
8.18713	KnChR-3.0-EYFP	2	3	-0.155167
8.30409	KnChR-3.0-EYFP	2	3	-0.152699
8.42105	KnChR-3.0-EYFP	2	3	-0.149466
8.53801	KnChR-3.0-EYFP	2	3	-0.148611
8.65497	KnChR-3.0-EYFP	2	3	-0.144801
8.77193	KnChR-3.0-EYFP	2	3	-0.142888
8.88889	KnChR-3.0-EYFP	2	3	-0.139698
9.00585	KnChR-3.0-EYFP	2	3	-0.136829
9.12281	KnChR-3.0-EYFP	2	3	-0.133597
9.23977	KnChR-3.0-EYFP	2	3	-0.128219
9.35673	KnChR-3.0-EYFP	2	3	-0.126354
9.47368	KnChR-3.0-EYFP	2	3	-0.122556
9.59064	KnChR-3.0-EYFP	2	3	-0.119868
9.7076	KnChR-3.0-EYFP	2	3	-0.117574
9.82456	KnChR-3.0-EYFP	2	3	-0.114035
9.94152	KnChR-3.0-EYFP	2	3	-0.112553
10.0585	KnChR-3.0-EYFP	2	3	-0.111273
10.1754	KnChR-3.0-EYFP	2	3	-0.1081
10.2924	KnChR-3.0-EYFP	2	3	-0.10578
10.4094	KnChR-3.0-EYFP	2	3	-0.101782
10.5263	KnChR-3.0-EYFP	2	3	-0.0995593
10.6433	KnChR-3.0-EYFP	2	3	-0.0953381
10.7602	KnChR-3.0-EYFP	2	3	-0.0931194
10.8772	KnChR-3.0-EYFP	2	3	-0.0918996
10.9942	KnChR-3.0-EYFP	2	3	-0.0901693
11.1111	KnChR-3.0-EYFP	2	3	-0.0881616
11.2281	KnChR-3.0-EYFP	2	3	-0.0861018
11.345	KnChR-3.0-EYFP	2	3	-0.0836792
11.462	KnChR-3.0-EYFP	2	3	-0.0844519
11.5789	KnChR-3.0-EYFP	2	3	-0.08156
11.6959	KnChR-3.0-EYFP	2	3	-0.0819458
11.8129	KnChR-3.0-EYFP	2	3	-0.0785496
11.9298	KnChR-3.0-EYFP	2	3	-0.0766203
12.0468	KnChR-3.0-EYFP	2	3	-0.0757089
12.1637	KnChR-3.0-EYFP	2	3	-0.0755532
12.2807	KnChR-3.0-EYFP	2	3	-0.0695966
12.3977	KnChR-3.0-EYFP	2	3	-0.0731688
12.5146	KnChR-3.0-EYFP	2	3	-0.0713129
12.6316	KnChR-3.0-EYFP	2	3	-0.0697544
12.7485	KnChR-3.0-EYFP	2	3	-0.0678503
12.8655	KnChR-3.0-EYFP	2	3	-0.0664194
12.9825	KnChR-3.0-EYFP	2	3	-0.064657
13.0994	KnChR-3.0-EYFP	2	3	-0.0619741
13.2164	KnChR-3.0-EYFP	2	3	-0.0597967
13.3333	KnChR-3.0-EYFP	2	3	-0.0583236
13.4503	KnChR-3.0-EYFP	2	3	-0.0570736
13.5673	KnChR-3.0-EYFP	2	3	-0.0551936
13.6842	KnChR-3.0-EYFP	2	3	-0.0536331
13.8012	KnChR-3.0-EYFP	2	3	-0.0548731
13.9181	KnChR-3.0-EYFP	2	3	-0.0548138
14.0351	KnChR-3.0-EYFP	2	3	-0.052353
14.152	KnChR-3.0-EYFP	2	3	-0.0480584
14.269	KnChR-3.0-EYFP	2	3	-0.0445928
14.386	KnChR-3.0-EYFP	2	3	-0.044229
14.5029	KnChR-3.0-EYFP	2	3	-0.0428424
14.6199	KnChR-3.0-EYFP	2	3	-0.0429891
14.7368	KnChR-3.0-EYFP	2	3	-0.0414517
14.8538	KnChR-3.0-EYFP	2	3	-0.0410649
14.9708	KnChR-3.0-EYFP	2	3	-0.039627
15.0877	KnChR-3.0-EYFP	2	3	-0.0387136
15.2047	KnChR-3.0-EYFP	2	3	-0.0379107
15.3216	KnChR-3.0-EYFP	2	3	-0.0370094
15.4386	KnChR-3.0-EYFP	2	3	-0.0357082
15.5556	KnChR-3.0-EYFP	2	3	-0.0345416
15.6725	KnChR-3.0-EYFP	2	3	-0.033581
15.7895	KnChR-3.0-EYFP	2	3	-0.0328465
15.9064	KnChR-3.0-EYFP	2	3	-0.0334484
16.0234	KnChR-3.0-EYFP	2	3	-0.0283137
16.1404	KnChR-3.0-EYFP	2	3	-0.0281901
16.2573	KnChR-3.0-EYFP	2	3	-0.0261252
16.3743	KnChR-3.0-EYFP	2	3	-0.0259936
16.4912	KnChR-3.0-EYFP	2	3	-0.0236594
16.6082	KnChR-3.0-EYFP	2	3	-0.0253154
16.7251	KnChR-3.0-EYFP	2	3	-0.0196462
16.8421	KnChR-3.0-EYFP	2	3	-0.0212268
16.9591	KnChR-3.0-EYFP	2	3	-0.0204742
17.076	KnChR-3.0-EYFP	2	3	-0.0195357
17.193	KnChR-3.0-EYFP	2	3	-0.0178968
17.3099	KnChR-3.0-EYFP	2	3	-0.0161906
17.4269	KnChR-3.0-EYFP	2	3	-0.0197426
17.5439	KnChR-3.0-EYFP	2	3	-0.0190986
17.6608	KnChR-3.0-EYFP	2	3	-0.0188393
17.7778	KnChR-3.0-EYFP	2	3	-0.0182414
17.8947	KnChR-3.0-EYFP	2	3	-0.0184665
18.0117	KnChR-3.0-EYFP	2	3	-0.0136223
18.1287	KnChR-3.0-EYFP	2	3	-0.0145206
18.2456	KnChR-3.0-EYFP	2	3	-0.0129119
18.3626	KnChR-3.0-EYFP	2	3	-0.0103044
18.4795	KnChR-3.0-EYFP	2	3	-0.010438
18.5965	KnChR-3.0-EYFP	2	3	-0.0106511
18.7135	KnChR-3.0-EYFP	2	3	-0.00884942
18.8304	KnChR-3.0-EYFP	2	3	-0.00909962
18.9474	KnChR-3.0-EYFP	2	3	-0.00589526
19.0643	KnChR-3.0-EYFP	2	3	-0.005006
19.1813	KnChR-3.0-EYFP	2	3	-0.00804155
19.2982	KnChR-3.0-EYFP	2	3	-0.00761149
19.4152	KnChR-3.0-EYFP	2	3	-0.00613843
19.5322	KnChR-3.0-EYFP	2	3	-0.00670414
19.6491	KnChR-3.0-EYFP	2	3	-0.00618163
19.7661	KnChR-3.0-EYFP	2	3	-0.00413482
19.883	KnChR-3.0-EYFP	2	3	-0.000153737
0	control	1	1	0
0.116959	control	1	1	-0.100898
0.233918	control	1	1	-0.132324
0.350877	control	1	1	-0.202615
0.467836	control	1	1	-0.223281
0.584795	control	1	1	-0.271025
0.701754	control	1	1	-0.289425
0.818713	control	1	1	-0.342956
0.935673	control	1	1	-0.333621
1.05263	control	1	1	-0.39276
1.16959	control	1	1	-0.373021
1.28655	control	1	1	-0.420131
1.40351	control	1	1	-0.409399
1.52047	control	1	1	-0.443889
1.63743	control	1	1	-0.458911
1.75439	control	1	1	-0.453111
1.87135	control	1	1	-0.480638
1.9883	control	1	1	-0.46432
2.10526	control	1	1	-0.494363
2.22222	control	1	1	-0.486175
2.33918	control	1	1	-0.494242
2.45614	control	1	1	-0.507561
2.5731	control	1	1	-0.499152
2.69006	control	1	1	-0.51624
2.80702	control	1	1	-0.510753
2.92398	control	1	1	-0.519404
3.04094	control	1	1	-0.532865
3.15789	control	1	1	-0.519711
3.27485	control	1	1	-0.554479
3.39181	control	1	1	-0.52668
3.50877	control	1	1	-0.548379
3.62573	control	1	1	-0.536792
3.74269	control	1	1	-0.530043
3.85965	control	1	1	-0.546747
3.97661	control	1	1	-0.527257
4.09357	control	1	1	-0.554436
4.21053	control	1	1	-0.529887
4.32749	control	1	1	-0.555042
4.44444	control	1	1	-0.536428
4.5614	control	1	1	-0.550004
4.67836	control	1	1	-0.555562
4.79532	control	1	1	-0.542179
4.91228	control	1	1	-0.55713
5.02924	control	1	1	-0.53201
5.1462	control	1	1	-0.567448
5.26316	control	1	1	-0.53588
5.38012	control	1	1	-0.557529
5.49708	control	1	1	-0.544559
5.61404	control	1	1	-0.539806
5.73099	control	1	1	-0.556267
5.84795	control	1	1	-0.538003
5.96491	control	1	1	-0.547631
6.08187	control	1	1	-0.527157
6.19883	control	1	1	-0.556175
6.31579	control	1	1	-0.536599
6.43275	control	1	1	-0.55755
6.54971	control	1	1	-0.547175
6.66667	control	1	1	-0.540676
6.78363	control	1	1	-0.554764
6.90058	control	1	1	-0.536443
7.01754	control	1	1	-0.559873
7.1345	control	1	1	-0.5335
7.25146	control	1	1	-0.562752
7.36842	control	1	1	-0.539101
7.48538	control	1	1	-0.560892
7.60234	control	1	1	-0.546519
7.7193	control	1	1	-0.546768
7.83626	control	1	1	-0.556966
7.95322	control	1	1	-0.541196
8.07018	control	1	1	-0.560671
8.18713	control	1	1	-0.539158
8.30409	control	1	1	-0.564163
8.42105	control	1	1	-0.54044
8.53801	control	1	1	-0.564234
8.65497	control	1	1	-0.54922
8.77193	control	1	1	-0.555255
8.88889	control	1	1	-0.555961
9.00585	control	1	1	-0.543177
9.12281	control	1	1	-0.562602
9.23977	control	1	1	-0.542664
9.35673	control	1	1	-0.568888
9.47368	control	1	1	-0.542763
9.59064	control	1	1	-0.567427
9.7076	control	1	1	-0.544581
9.82456	control	1	1	-0.565282
9.94152	control	1	1	-0.55197
10.0585	control	1	1	-0.555277
10.1754	control	1	1	-0.559225
10.2924	control	1	1	-0.545671
10.4094	control	1	1	-0.566386
10.5263	control	1	1	-0.544631
10.6433	control	1	1	-0.569401
10.7602	control	1	1	-0.544467
10.8772	control	1	1	-0.572451
10.9942	control	1	1	-0.549868
11.1111	control	1	1	-0.566899
11.2281	control	1	1	-0.55626
11.345	control	1	1	-0.554358
11.462	control	1	1	-0.564783
11.5789	control	1	1	-0.549583
11.6959	control	1	1	-0.570534
11.8129	control	1	1	-0.548015
11.9298	control	1	1	-0.571539
12.0468	control	1	1	-0.551122
12.1637	control	1	1	-0.575301
12.2807	control	1	1	-0.555156
12.3977	control	1	1	-0.56841
12.5146	control	1	1	-0.5605
12.6316	control	1	1	-0.553894
12.7485	control	1	1	-0.568766
12.8655	control	1	1	-0.550445
12.9825	control	1	1	-0.573113
13.0994	control	1	1	-0.547923
13.2164	control	1	1	-0.574474
13.3333	control	1	1	-0.551828
13.4503	control	1	1	-0.575508
13.5673	control	1	1	-0.557294
13.6842	control	1	1	-0.569372
13.8012	control	1	1	-0.563422
13.9181	control	1	1	-0.556752
14.0351	control	1	1	-0.568681
14.152	control	1	1	-0.554621
14.269	control	1	1	-0.57622
14.386	control	1	1	-0.553695
14.5029	control	1	1	-0.578194
14.6199	control	1	1	-0.55465
14.7368	control	1	1	-0.578857
14.8538	control	1	1	-0.556802
14.9708	control	1	1	-0.570997
15.0877	control	1	1	-0.566358
15.2047	control	1	1	-0.558541
15.3216	control	1	1	-0.572465
15.4386	control	1	1	-0.556082
15.5556	control	1	1	-0.576904
15.6725	control	1	1	-0.556859
15.7895	control	1	1	-0.57989
15.9064	control	1	1	-0.555426
16.0234	control	1	1	-0.580418
16.1404	control	1	1	-0.562453
16.2573	control	1	1	-0.572237
16.3743	control	1	1	-0.568061
16.4912	control	1	1	-0.562944
16.6082	control	1	1	-0.575657
16.7251	control	1	1	-0.556438
16.8421	control	1	1	-0.580076
16.9591	control	1	1	-0.557614
17.076	control	1	1	-0.582313
17.193	control	1	1	-0.559495
17.3099	control	1	1	-0.580161
17.4269	control	1	1	-0.565225
17.5439	control	1	1	-0.569066
17.6608	control	1	1	-0.571496
17.7778	control	1	1	-0.560094
17.8947	control	1	1	-0.579619
18.0117	control	1	1	-0.558341
18.1287	control	1	1	-0.579456
18.2456	control	1	1	-0.558491
18.3626	control	1	1	-0.582605
18.4795	control	1	1	-0.561648
18.5965	control	1	1	-0.582869
18.7135	control	1	1	-0.567534
18.8304	control	1	1	-0.572066
18.9474	control	1	1	-0.574018
19.0643	control	1	1	-0.56318
19.1813	control	1	1	-0.582719
19.2982	control	1	1	-0.561519
19.4152	control	1	1	-0.5848
19.5322	control	1	1	-0.56142
19.6491	control	1	1	-0.584821
19.7661	control	1	1	-0.56613
19.883	control	1	1	-0.584722
0	control	1	2	0
0.116959	control	1	2	-0.0806389
0.233918	control	1	2	-0.129627
0.350877	control	1	2	-0.195914
0.467836	control	1	2	-0.221954
0.584795	control	1	2	-0.288902
0.701754	control	1	2	-0.288421
0.818713	control	1	2	-0.356022
0.935673	control	1	2	-0.347109
1.05263	control	1	2	-0.398888
1.16959	control	1	2	-0.391986
1.28655	control	1	2	-0.431897
1.40351	control	1	2	-0.431492
1.52047	control	1	2	-0.454658
1.63743	control	1	2	-0.466579
1.75439	control	1	2	-0.468559
1.87135	control	1	2	-0.493323
1.9883	control	1	2	-0.48087
2.10526	control	1	2	-0.505656
2.22222	control	1	2	-0.493803
2.33918	control	1	2	-0.514794
2.45614	control	1	2	-0.505484
2.5731	control	1	2	-0.518237
2.69006	control	1	2	-0.524772
2.80702	control	1	2	-0.517525
2.92398	control	1	2	-0.546775
3.04094	control	1	2	-0.520015
3.15789	control	1	2	-0.552056
3.27485	control	1	2	-0.532063
3.39181	control	1	2	-0.543376
3.50877	control	1	2	-0.543917
3.62573	control	1	2	-0.539348
3.74269	control	1	2	-0.548748
3.85965	control	1	2	-0.535582
3.97661	control	1	2	-0.556678
4.09357	control	1	2	-0.533234
4.21053	control	1	2	-0.558253
4.32749	control	1	2	-0.533879
4.44444	control	1	2	-0.558898
4.5614	control	1	2	-0.535027
4.67836	control	1	2	-0.558943
4.79532	control	1	2	-0.538725
4.91228	control	1	2	-0.55814
5.02924	control	1	2	-0.542791
5.1462	control	1	2	-0.552454
5.26316	control	1	2	-0.54838
5.38012	control	1	2	-0.548125
5.49708	control	1	2	-0.553699
5.61404	control	1	2	-0.545995
5.73099	control	1	2	-0.561434
5.84795	control	1	2	-0.545049
5.96491	control	1	2	-0.56649
6.08187	control	1	2	-0.545365
6.19883	control	1	2	-0.569453
6.31579	control	1	2	-0.545545
6.43275	control	1	2	-0.571074
6.54971	control	1	2	-0.544989
6.66667	control	1	2	-0.569108
6.78363	control	1	2	-0.54742
6.90058	control	1	2	-0.566032
7.01754	control	1	2	-0.552521
7.1345	control	1	2	-0.560856
7.25146	control	1	2	-0.557263
7.36842	control	1	2	-0.553459
7.48538	control	1	2	-0.561696
7.60234	control	1	2	-0.552154
7.7193	control	1	2	-0.565395
7.83626	control	1	2	-0.549896
7.95322	control	1	2	-0.569438
8.07018	control	1	2	-0.54883
8.18713	control	1	2	-0.574645
8.30409	control	1	2	-0.548763
8.42105	control	1	2	-0.573504
8.53801	control	1	2	-0.550616
8.65497	control	1	2	-0.574442
8.77193	control	1	2	-0.552251
8.88889	control	1	2	-0.571539
9.00585	control	1	2	-0.557233
9.12281	control	1	2	-0.566063
9.23977	control	1	2	-0.561396
9.35673	control	1	2	-0.560871
9.47368	control	1	2	-0.564982
9.59064	control	1	2	-0.557413
9.7076	control	1	2	-0.567803
9.82456	control	1	2	-0.553812
9.94152	control	1	2	-0.572169
10.0585	control	1	2	-0.554539
10.1754	control	1	2	-0.577218
10.2924	control	1	2	-0.552544
10.4094	control	1	2	-0.579596
10.5263	control	1	2	-0.554997
10.6433	control	1	2	-0.579874
10.7602	control	1	2	-0.556925
10.8772	control	1	2	-0.578613
10.9942	control	1	2	-0.557675
11.1111	control	1	2	-0.573917
11.2281	control	1	2	-0.561929
11.345	control	1	2	-0.56664
11.462	control	1	2	-0.566175
11.5789	control	1	2	-0.563887
11.6959	control	1	2	-0.570669
11.8129	control	1	2	-0.562101
11.9298	control	1	2	-0.574817
12.0468	control	1	2	-0.558966
12.1637	control	1	2	-0.575943
12.2807	control	1	2	-0.558433
12.3977	control	1	2	-0.578883
12.5146	control	1	2	-0.556918
12.6316	control	1	2	-0.580391
12.7485	control	1	2	-0.556663
12.8655	control	1	2	-0.582162
12.9825	control	1	2	-0.558816
13.0994	control	1	2	-0.581344
13.2164	control	1	2	-0.559686
13.3333	control	1	2	-0.578681
13.4503	control	1	2	-0.565237
13.5673	control	1	2	-0.573677
13.6842	control	1	2	-0.569716
13.8012	control	1	2	-0.56745
13.9181	control	1	2	-0.570264
14.0351	control	1	2	-0.563467
14.152	control	1	2	-0.57637
14.269	control	1	2	-0.563797
14.386	control	1	2	-0.580571
14.5029	control	1	2	-0.561441
14.6199	control	1	2	-0.58388
14.7368	control	1	2	-0.560038
14.8538	control	1	2	-0.586213
14.9708	control	1	2	-0.560939
15.0877	control	1	2	-0.5855
15.2047	control	1	2	-0.561171
15.3216	control	1	2	-0.58415
15.4386	control	1	2	-0.563812
15.5556	control	1	2	-0.582049
15.6725	control	1	2	-0.566573
15.7895	control	1	2	-0.576303
15.9064	control	1	2	-0.571156
16.0234	control	1	2	-0.571621
16.1404	control	1	2	-0.57718
16.2573	control	1	2	-0.567263
16.3743	control	1	2	-0.577901
16.4912	control	1	2	-0.567615
16.6082	control	1	2	-0.580826
16.7251	control	1	2	-0.565027
16.8421	control	1	2	-0.585523
16.9591	control	1	2	-0.564765
17.076	control	1	2	-0.586408
17.193	control	1	2	-0.562297
17.3099	control	1	2	-0.587676
17.4269	control	1	2	-0.564352
17.5439	control	1	2	-0.588486
17.6608	control	1	2	-0.566423
17.7778	control	1	2	-0.584975
17.8947	control	1	2	-0.569318
18.0117	control	1	2	-0.579243
18.1287	control	1	2	-0.572874
18.2456	control	1	2	-0.574562
18.3626	control	1	2	-0.577863
18.4795	control	1	2	-0.571569
18.5965	control	1	2	-0.582439
18.7135	control	1	2	-0.569228
18.8304	control	1	2	-0.587203
18.9474	control	1	2	-0.568208
19.0643	control	1	2	-0.588118
19.1813	control	1	2	-0.567233
19.2982	control	1	2	-0.589424
19.4152	control	1	2	-0.567353
19.5322	control	1	2	-0.591344
19.6491	control	1	2	-0.568006
19.7661	control	1	2	-0.590256
19.883	control	1	2	-0.571059
0	control	1	3	0
0.116959	control	1	3	-0.0650894
0.233918	control	1	3	-0.138614
0.350877	control	1	3	-0.166585
0.467836	control	1	3	-0.239167
0.584795	control	1	3	-0.25257
0.701754	control	1	3	-0.320088
0.818713	control	1	3	-0.318818
0.935673	control	1	3	-0.387565
1.05263	control	1	3	-0.370121
1.16959	control	1	3	-0.437167
1.28655	control	1	3	-0.404898
1.40351	control	1	3	-0.463222
1.52047	control	1	3	-0.434292
1.63743	control	1	3	-0.48236
1.75439	control	1	3	-0.460099
1.87135	control	1	3	-0.496178
1.9883	control	1	3	-0.49121
2.10526	control	1	3	-0.509693
2.22222	control	1	3	-0.531906
2.33918	control	1	3	-0.50986
2.45614	control	1	3	-0.549238
2.5731	control	1	3	-0.511234
2.69006	control	1	3	-0.547481
2.80702	control	1	3	-0.523327
2.92398	control	1	3	-0.545253
3.04094	control	1	3	-0.545708
3.15789	control	1	3	-0.54419
3.27485	control	1	3	-0.56836
3.39181	control	1	3	-0.54177
3.50877	control	1	3	-0.578209
3.62573	control	1	3	-0.547313
3.74269	control	1	3	-0.579143
3.85965	control	1	3	-0.552801
3.97661	control	1	3	-0.573312
4.09357	control	1	3	-0.557322
4.21053	control	1	3	-0.568009
4.32749	control	1	3	-0.560373
4.44444	control	1	3	-0.559446
4.5614	control	1	3	-0.562266
4.67836	control	1	3	-0.554965
4.79532	control	1	3	-0.567593
4.91228	control	1	3	-0.553384
5.02924	control	1	3	-0.571332
5.1462	control	1	3	-0.551555
5.26316	control	1	3	-0.574215
5.38012	control	1	3	-0.551507
5.49708	control	1	3	-0.577098
5.61404	control	1	3	-0.552617
5.73099	control	1	3	-0.57852
5.84795	control	1	3	-0.553128
5.96491	control	1	3	-0.580653
6.08187	control	1	3	-0.554183
6.19883	control	1	3	-0.582913
6.31579	control	1	3	-0.556036
6.43275	control	1	3	-0.5838
6.54971	control	1	3	-0.561228
6.66667	control	1	3	-0.585078
6.78363	control	1	3	-0.56447
6.90058	control	1	3	-0.58122
7.01754	control	1	3	-0.571212
7.1345	control	1	3	-0.575325
7.25146	control	1	3	-0.573792
7.36842	control	1	3	-0.566731
7.48538	control	1	3	-0.576563
7.60234	control	1	3	-0.563208
7.7193	control	1	3	-0.580717
7.83626	control	1	3	-0.561795
7.95322	control	1	3	-0.583425
8.07018	control	1	3	-0.560325
8.18713	control	1	3	-0.58511
8.30409	control	1	3	-0.559398
8.42105	control	1	3	-0.584966
8.53801	control	1	3	-0.55975
8.65497	control	1	3	-0.586556
8.77193	control	1	3	-0.560748
8.88889	control	1	3	-0.587354
9.00585	control	1	3	-0.56451
9.12281	control	1	3	-0.588201
9.23977	control	1	3	-0.568384
9.35673	control	1	3	-0.590637
9.47368	control	1	3	-0.569662
9.59064	control	1	3	-0.5865
9.7076	control	1	3	-0.569574
9.82456	control	1	3	-0.573217
9.94152	control	1	3	-0.571459
10.0585	control	1	3	-0.566555
10.1754	control	1	3	-0.5763
10.2924	control	1	3	-0.563288
10.4094	control	1	3	-0.581683
10.5263	control	1	3	-0.564399
10.6433	control	1	3	-0.586388
10.7602	control	1	3	-0.561859
10.8772	control	1	3	-0.586332
10.9942	control	1	3	-0.56336
11.1111	control	1	3	-0.586923
11.2281	control	1	3	-0.560964
11.345	control	1	3	-0.588696
11.462	control	1	3	-0.56356
11.5789	control	1	3	-0.589471
11.6959	control	1	3	-0.56459
11.8129	control	1	3	-0.589535
11.9298	control	1	3	-0.5663
12.0468	control	1	3	-0.588856
12.1637	control	1	3	-0.568608
12.2807	control	1	3	-0.587346
12.3977	control	1	3	-0.571915
12.5146	control	1	3	-0.585254
12.6316	control	1	3	-0.574742
12.7485	control	1	3	-0.581196
12.8655	control	1	3	-0.578544
12.9825	control	1	3	-0.573536
13.0994	control	1	3	-0.581476
13.2164	control	1	3	-0.57114
13.3333	control	1	3	-0.585509
13.4503	control	1	3	-0.569934
13.5673	control	1	3	-0.589335
13.6842	control	1	3	-0.569399
13.8012	control	1	3	-0.591684
13.9181	control	1	3	-0.568528
14.0351	control	1	3	-0.592914
14.152	control	1	3	-0.567705
14.269	control	1	3	-0.592954
14.386	control	1	3	-0.567522
14.5029	control	1	3	-0.593952
14.6199	control	1	3	-0.568863
14.7368	control	1	3	-0.595701
14.8538	control	1	3	-0.570629
14.9708	control	1	3	-0.596388
15.0877	control	1	3	-0.573888
15.2047	control	1	3	-0.593776
15.3216	control	1	3	-0.576507
15.4386	control	1	3	-0.589088
15.5556	control	1	3	-0.580269
15.6725	control	1	3	-0.583297
15.7895	control	1	3	-0.583448
15.9064	control	1	3	-0.577905
16.0234	control	1	3	-0.586739
16.1404	control	1	3	-0.575014
16.2573	control	1	3	-0.590102
16.3743	control	1	3	-0.573257
16.4912	control	1	3	-0.592123
16.6082	control	1	3	-0.57229
16.7251	control	1	3	-0.59388
16.8421	control	1	3	-0.571827
16.9591	control	1	3	-0.59416
17.076	control	1	3	-0.572769
17.193	control	1	3	-0.598041
17.3099	control	1	3	-0.572713
17.4269	control	1	3	-0.598297
17.5439	control	1	3	-0.573193
17.6608	control	1	3	-0.597251
17.7778	control	1	3	-0.573464
17.8947	control	1	3	-0.5992
18.0117	control	1	3	-0.574199
18.1287	control	1	3	-0.598688
18.2456	control	1	3	-0.576467
18.3626	control	1	3	-0.597738
18.4795	control	1	3	-0.578289
18.5965	control	1	3	-0.594894
18.7135	control	1	3	-0.580525
18.8304	control	1	3	-0.591396
18.9474	control	1	3	-0.582115
19.0643	control	1	3	-0.586955
19.1813	control	1	3	-0.585541
19.2982	control	1	3	-0.581691
19.4152	control	1	3	-0.588656
19.5322	control	1	3	-0.579223
19.6491	control	1	3	-0.591084
19.7661	control	1	3	-0.576971
19.883	control	1	3	-0.593233
0	control	2	1	0
0.116959	control	2	1	-0.0880437
0.233918	control	2	1	-0.130885
0.350877	control	2	1	-0.20388
0.467836	control	2	1	-0.214968
0.584795	control	2	1	-0.289998
0.701754	control	2	1	-0.291916
0.818713	control	2	1	-0.357057
0.935673	control	2	1	-0.348398
1.05263	control	2	1	-0.402176
1.16959	control	2	1	-0.393701
1.28655	control	2	1	-0.436475
1.40351	control	2	1	-0.439172
1.52047	control	2	1	-0.458976
1.63743	control	2	1	-0.4707
1.75439	control	2	1	-0.477114
1.87135	control	2	1	-0.482264
1.9883	control	2	1	-0.498392
2.10526	control	2	1	-0.490764
2.22222	control	2	1	-0.511631
2.33918	control	2	1	-0.501499
2.45614	control	2	1	-0.521873
2.5731	control	2	1	-0.508474
2.69006	control	2	1	-0.528069
2.80702	control	2	1	-0.51581
2.92398	control	2	1	-0.53301
3.04094	control	2	1	-0.523698
3.15789	control	2	1	-0.537926
3.27485	control	2	1	-0.538562
3.39181	control	2	1	-0.543218
3.50877	control	2	1	-0.54511
3.62573	control	2	1	-0.544281
3.74269	control	2	1	-0.545127
3.85965	control	2	1	-0.543302
3.97661	control	2	1	-0.548025
4.09357	control	2	1	-0.543469
4.21053	control	2	1	-0.549632
4.32749	control	2	1	-0.542967
4.44444	control	2	1	-0.551877
4.5614	control	2	1	-0.544323
4.67836	control	2	1	-0.556281
4.79532	control	2	1	-0.559698
4.91228	control	2	1	-0.561448
5.02924	control	2	1	-0.56005
5.1462	control	2	1	-0.557429
5.26316	control	2	1	-0.557864
5.38012	control	2	1	-0.557219
5.49708	control	2	1	-0.559606
5.61404	control	2	1	-0.554196
5.73099	control	2	1	-0.561515
5.84795	control	2	1	-0.559338
5.96491	control	2	1	-0.562495
6.08187	control	2	1	-0.56113
6.19883	control	2	1	-0.560652
6.31579	control	2	1	-0.560267
6.43275	control	2	1	-0.560619
6.54971	control	2	1	-0.559547
6.66667	control	2	1	-0.559597
6.78363	control	2	1	-0.556851
6.90058	control	2	1	-0.559522
7.01754	control	2	1	-0.563223
7.1345	control	2	1	-0.568482
7.25146	control	2	1	-0.565878
7.36842	control	2	1	-0.564898
7.48538	control	2	1	-0.56638
7.60234	control	2	1	-0.561758
7.7193	control	2	1	-0.566271
7.83626	control	2	1	-0.563885
7.95322	control	2	1	-0.564923
8.07018	control	2	1	-0.568516
8.18713	control	2	1	-0.572636
8.30409	control	2	1	-0.57189
8.42105	control	2	1	-0.567846
8.53801	control	2	1	-0.57632
8.65497	control	2	1	-0.565049
8.77193	control	2	1	-0.574042
8.88889	control	2	1	-0.566816
9.00585	control	2	1	-0.570082
9.12281	control	2	1	-0.571212
9.23977	control	2	1	-0.57261
9.35673	control	2	1	-0.575056
9.47368	control	2	1	-0.570693
9.59064	control	2	1	-0.576513
9.7076	control	2	1	-0.567904
9.82456	control	2	1	-0.57359
9.94152	control	2	1	-0.568583
10.0585	control	2	1	-0.575407
10.1754	control	2	1	-0.573573
10.2924	control	2	1	-0.576295
10.4094	control	2	1	-0.579234
10.5263	control	2	1	-0.572317
10.6433	control	2	1	-0.580474
10.7602	control	2	1	-0.570944
10.8772	control	2	1	-0.579477
10.9942	control	2	1	-0.571932
11.1111	control	2	1	-0.57601
11.2281	control	2	1	-0.575717
11.345	control	2	1	-0.579486
11.462	control	2	1	-0.583513
11.5789	control	2	1	-0.575759
11.6959	control	2	1	-0.588513
11.8129	control	2	1	-0.572753
11.9298	control	2	1	-0.586436
12.0468	control	2	1	-0.575793
12.1637	control	2	1	-0.583815
12.2807	control	2	1	-0.583304
12.3977	control	2	1	-0.582165
12.5146	control	2	1	-0.588764
12.6316	control	2	1	-0.578028
12.7485	control	2	1	-0.590347
12.8655	control	2	1	-0.57658
12.9825	control	2	1	-0.589476
13.0994	control	2	1	-0.577317
13.2164	control	2	1	-0.58549
13.3333	control	2	1	-0.582308
13.4503	control	2	1	-0.580222
13.5673	control	2	1	-0.587206
13.6842	control	2	1	-0.580365
13.8012	control	2	1	-0.592139
13.9181	control	2	1	-0.577802
14.0351	control	2	1	-0.589584
14.152	control	2	1	-0.577861
14.269	control	2	1	-0.587658
14.386	control	2	1	-0.579988
14.5029	control	2	1	-0.583631
14.6199	control	2	1	-0.585037
14.7368	control	2	1	-0.582408
14.8538	control	2	1	-0.588956
14.9708	control	2	1	-0.577735
15.0877	control	2	1	-0.592088
15.2047	control	2	1	-0.578305
15.3216	control	2	1	-0.59079
15.4386	control	2	1	-0.580859
15.5556	control	2	1	-0.586461
15.6725	control	2	1	-0.587826
15.7895	control	2	1	-0.585883
15.9064	control	2	1	-0.594132
16.0234	control	2	1	-0.581428
16.1404	control	2	1	-0.594056
16.2573	control	2	1	-0.580633
16.3743	control	2	1	-0.593529
16.4912	control	2	1	-0.583781
16.6082	control	2	1	-0.589434
16.7251	control	2	1	-0.58755
16.8421	control	2	1	-0.58317
16.9591	control	2	1	-0.592206
17.076	control	2	1	-0.585372
17.193	control	2	1	-0.595547
17.3099	control	2	1	-0.581378
17.4269	control	2	1	-0.593621
17.5439	control	2	1	-0.581462
17.6608	control	2	1	-0.591879
17.7778	control	2	1	-0.585222
17.8947	control	2	1	-0.587005
18.0117	control	2	1	-0.590966
18.1287	control	2	1	-0.586369
18.2456	control	2	1	-0.59455
18.3626	control	2	1	-0.584125
18.4795	control	2	1	-0.595898
18.5965	control	2	1	-0.583178
18.7135	control	2	1	-0.595898
18.8304	control	2	1	-0.585113
18.9474	control	2	1	-0.590363
19.0643	control	2	1	-0.590079
19.1813	control	2	1	-0.586788
19.2982	control	2	1	-0.592783
19.4152	control	2	1	-0.589844
19.5322	control	2	1	-0.595689
19.6491	control	2	1	-0.584753
19.7661	control	2	1	-0.598494
19.883	control	2	1	-0.585104
0	control	2	2	0
0.116959	control	2	2	-0.0665729
0.233918	control	2	2	-0.10795
0.350877	control	2	2	-0.183731
0.467836	control	2	2	-0.195652
0.584795	control	2	2	-0.274834
0.701754	control	2	2	-0.270064
0.818713	control	2	2	-0.343286
0.935673	control	2	2	-0.333738
1.05263	control	2	2	-0.392379
1.16959	control	2	2	-0.388753
1.28655	control	2	2	-0.429295
1.40351	control	2	2	-0.435333
1.52047	control	2	2	-0.452627
1.63743	control	2	2	-0.466922
1.75439	control	2	2	-0.472682
1.87135	control	2	2	-0.483598
1.9883	control	2	2	-0.494468
2.10526	control	2	2	-0.494074
2.22222	control	2	2	-0.506444
2.33918	control	2	2	-0.504874
2.45614	control	2	2	-0.516564
2.5731	control	2	2	-0.513959
2.69006	control	2	2	-0.526444
2.80702	control	2	2	-0.519927
2.92398	control	2	2	-0.533472
3.04094	control	2	2	-0.525671
3.15789	control	2	2	-0.538652
3.27485	control	2	2	-0.525408
3.39181	control	2	2	-0.54101
3.50877	control	2	2	-0.528725
3.62573	control	2	2	-0.544342
3.74269	control	2	2	-0.531377
3.85965	control	2	2	-0.545223
3.97661	control	2	2	-0.533511
4.09357	control	2	2	-0.549058
4.21053	control	2	2	-0.53682
4.32749	control	2	2	-0.550627
4.44444	control	2	2	-0.538273
4.5614	control	2	2	-0.552537
4.67836	control	2	2	-0.54111
4.79532	control	2	2	-0.553774
4.91228	control	2	2	-0.543437
5.02924	control	2	2	-0.556147
5.1462	control	2	2	-0.553952
5.26316	control	2	2	-0.559742
5.38012	control	2	2	-0.558931
5.49708	control	2	2	-0.560253
5.61404	control	2	2	-0.561374
5.73099	control	2	2	-0.560284
5.84795	control	2	2	-0.557539
5.96491	control	2	2	-0.555985
6.08187	control	2	2	-0.560129
6.19883	control	2	2	-0.556828
6.31579	control	2	2	-0.558676
6.43275	control	2	2	-0.553859
6.54971	control	2	2	-0.562031
6.66667	control	2	2	-0.554137
6.78363	control	2	2	-0.564281
6.90058	control	2	2	-0.554934
7.01754	control	2	2	-0.566538
7.1345	control	2	2	-0.558931
7.25146	control	2	2	-0.56561
7.36842	control	2	2	-0.564033
7.48538	control	2	2	-0.566198
7.60234	control	2	2	-0.566724
7.7193	control	2	2	-0.567242
7.83626	control	2	2	-0.565185
7.95322	control	2	2	-0.563306
8.07018	control	2	2	-0.563948
8.18713	control	2	2	-0.561559
8.30409	control	2	2	-0.565819
8.42105	control	2	2	-0.560608
8.53801	control	2	2	-0.567133
8.65497	control	2	2	-0.560052
8.77193	control	2	2	-0.567775
8.88889	control	2	2	-0.562394
9.00585	control	2	2	-0.570543
9.12281	control	2	2	-0.568842
9.23977	control	2	2	-0.572437
9.35673	control	2	2	-0.570705
9.47368	control	2	2	-0.573117
9.59064	control	2	2	-0.570682
9.7076	control	2	2	-0.571223
9.82456	control	2	2	-0.569522
9.94152	control	2	2	-0.566005
10.0585	control	2	2	-0.569344
10.1754	control	2	2	-0.565657
10.2924	control	2	2	-0.570156
10.4094	control	2	2	-0.565
10.5263	control	2	2	-0.570257
10.6433	control	2	2	-0.564466
10.7602	control	2	2	-0.572599
10.8772	control	2	2	-0.565232
10.9942	control	2	2	-0.575236
11.1111	control	2	2	-0.572785
11.2281	control	2	2	-0.575236
11.345	control	2	2	-0.575236
11.462	control	2	2	-0.577052
11.5789	control	2	2	-0.573558
11.6959	control	2	2	-0.572932
11.8129	control	2	2	-0.57304
11.9298	control	2	2	-0.570891
12.0468	control	2	2	-0.571246
12.1637	control	2	2	-0.569762
12.2807	control	2	2	-0.573311
12.3977	control	2	2	-0.568432
12.5146	control	2	2	-0.576117
12.6316	control	2	2	-0.567945
12.7485	control	2	2	-0.576921
12.8655	control	2	2	-0.56803
12.9825	control	2	2	-0.578413
13.0994	control	2	2	-0.574571
13.2164	control	2	2	-0.578398
13.3333	control	2	2	-0.57771
13.4503	control	2	2	-0.579975
13.5673	control	2	2	-0.576372
13.6842	control	2	2	-0.577246
13.8012	control	2	2	-0.574957
13.9181	control	2	2	-0.575189
14.0351	control	2	2	-0.575653
14.152	control	2	2	-0.572035
14.269	control	2	2	-0.576929
14.386	control	2	2	-0.568788
14.5029	control	2	2	-0.577029
14.6199	control	2	2	-0.567721
14.7368	control	2	2	-0.579681
14.8538	control	2	2	-0.570326
14.9708	control	2	2	-0.579828
15.0877	control	2	2	-0.576921
15.2047	control	2	2	-0.58139
15.3216	control	2	2	-0.58323
15.4386	control	2	2	-0.583137
15.5556	control	2	2	-0.580199
15.6725	control	2	2	-0.579449
15.7895	control	2	2	-0.578738
15.9064	control	2	2	-0.575305
16.0234	control	2	2	-0.578885
16.1404	control	2	2	-0.574261
16.2573	control	2	2	-0.578575
16.3743	control	2	2	-0.57389
16.4912	control	2	2	-0.580686
16.6082	control	2	2	-0.572491
16.7251	control	2	2	-0.581475
16.8421	control	2	2	-0.574826
16.9591	control	2	2	-0.582371
17.076	control	2	2	-0.579155
17.193	control	2	2	-0.584281
17.3099	control	2	2	-0.584389
17.4269	control	2	2	-0.585232
17.5439	control	2	2	-0.581776
17.6608	control	2	2	-0.581189
17.7778	control	2	2	-0.582132
17.8947	control	2	2	-0.5788
18.0117	control	2	2	-0.581923
18.1287	control	2	2	-0.578305
18.2456	control	2	2	-0.583083
18.3626	control	2	2	-0.576418
18.4795	control	2	2	-0.584737
18.5965	control	2	2	-0.576473
18.7135	control	2	2	-0.586407
18.8304	control	2	2	-0.579008
18.9474	control	2	2	-0.586252
19.0643	control	2	2	-0.584482
19.1813	control	2	2	-0.587551
19.2982	control	2	2	-0.586477
19.4152	control	2	2	-0.588912
19.5322	control	2	2	-0.586005
19.6491	control	2	2	-0.583933
19.7661	control	2	2	-0.583562
19.883	control	2	2	-0.581969
0	control	2	3	0
0.116959	control	2	3	-0.0764907
0.233918	control	2	3	-0.162028
0.350877	control	2	3	-0.183254
0.467836	control	2	3	-0.269217
0.584795	control	2	3	-0.26902
0.701754	control	2	3	-0.354541
0.818713	control	2	3	-0.336188
0.935673	control	2	3	-0.417928
1.05263	control	2	3	-0.394721
1.16959	control	2	3	-0.459702
1.28655	control	2	3	-0.437197
1.40351	control	2	3	-0.483841
1.52047	control	2	3	-0.473943
1.63743	control	2	3	-0.49494
1.75439	control	2	3	-0.505186
1.87135	control	2	3	-0.528197
1.9883	control	2	3	-0.548768
2.10526	control	2	3	-0.505889
2.22222	control	2	3	-0.523744
2.33918	control	2	3	-0.523776
2.45614	control	2	3	-0.53654
2.5731	control	2	3	-0.539201
2.69006	control	2	3	-0.546747
2.80702	control	2	3	-0.530438
2.92398	control	2	3	-0.548192
3.04094	control	2	3	-0.553867
3.15789	control	2	3	-0.550497
3.27485	control	2	3	-0.54565
3.39181	control	2	3	-0.55532
3.50877	control	2	3	-0.563687
3.62573	control	2	3	-0.556054
3.74269	control	2	3	-0.565676
3.85965	control	2	3	-0.558572
3.97661	control	2	3	-0.564571
4.09357	control	2	3	-0.559045
4.21053	control	2	3	-0.565779
4.32749	control	2	3	-0.562471
4.44444	control	2	3	-0.568589
4.5614	control	2	3	-0.5642
4.67836	control	2	3	-0.570507
4.79532	control	2	3	-0.567737
4.91228	control	2	3	-0.571123
5.02924	control	2	3	-0.573815
5.1462	control	2	3	-0.573294
5.26316	control	2	3	-0.580043
5.38012	control	2	3	-0.576562
5.49708	control	2	3	-0.583548
5.61404	control	2	3	-0.578022
5.73099	control	2	3	-0.580667
5.84795	control	2	3	-0.57803
5.96491	control	2	3	-0.576404
6.08187	control	2	3	-0.576412
6.19883	control	2	3	-0.574044
6.31579	control	2	3	-0.576641
6.43275	control	2	3	-0.575378
6.54971	control	2	3	-0.578069
6.66667	control	2	3	-0.578164
6.78363	control	2	3	-0.582356
6.90058	control	2	3	-0.579861
7.01754	control	2	3	-0.586784
7.1345	control	2	3	-0.582198
7.25146	control	2	3	-0.588695
7.36842	control	2	3	-0.584495
7.48538	control	2	3	-0.584519
7.60234	control	2	3	-0.58504
7.7193	control	2	3	-0.582222
7.83626	control	2	3	-0.584195
7.95322	control	2	3	-0.579625
8.07018	control	2	3	-0.581637
8.18713	control	2	3	-0.581953
8.30409	control	2	3	-0.582624
8.42105	control	2	3	-0.5835
8.53801	control	2	3	-0.59111
8.65497	control	2	3	-0.586382
8.77193	control	2	3	-0.594978
8.88889	control	2	3	-0.590415
9.00585	control	2	3	-0.586792
9.12281	control	2	3	-0.588418
9.23977	control	2	3	-0.583208
9.35673	control	2	3	-0.586105
9.47368	control	2	3	-0.581235
9.59064	control	2	3	-0.590636
9.7076	control	2	3	-0.582735
9.82456	control	2	3	-0.589871
9.94152	control	2	3	-0.586303
10.0585	control	2	3	-0.591371
10.1754	control	2	3	-0.587234
10.2924	control	2	3	-0.593241
10.4094	control	2	3	-0.591142
10.5263	control	2	3	-0.588631
10.6433	control	2	3	-0.593573
10.7602	control	2	3	-0.584629
10.8772	control	2	3	-0.593644
10.9942	control	2	3	-0.583066
11.1111	control	2	3	-0.59482
11.2281	control	2	3	-0.584353
11.345	control	2	3	-0.594118
11.462	control	2	3	-0.588308
11.5789	control	2	3	-0.59347
11.6959	control	2	3	-0.593604
11.8129	control	2	3	-0.593005
11.9298	control	2	3	-0.597954
12.0468	control	2	3	-0.588687
12.1637	control	2	3	-0.595649
12.2807	control	2	3	-0.586318
12.3977	control	2	3	-0.594946
12.5146	control	2	3	-0.5856
12.6316	control	2	3	-0.591828
12.7485	control	2	3	-0.583106
12.8655	control	2	3	-0.59227
12.9825	control	2	3	-0.586208
13.0994	control	2	3	-0.593226
13.2164	control	2	3	-0.587439
13.3333	control	2	3	-0.593297
13.4503	control	2	3	-0.592736
13.5673	control	2	3	-0.596186
13.6842	control	2	3	-0.599343
[truncated: 53 more rows]

## Sheet: F
time point	GtACR1-EYFP or control	sample number	trial number	ΔF/F
0	GtACR1-EYFP	1	1	0
0.116959	GtACR1-EYFP	1	1	-0.0379392
0.233918	GtACR1-EYFP	1	1	-0.0710041
0.350877	GtACR1-EYFP	1	1	-0.0978368
0.467836	GtACR1-EYFP	1	1	-0.124199
0.584795	GtACR1-EYFP	1	1	-0.147406
0.701754	GtACR1-EYFP	1	1	-0.166143
0.818713	GtACR1-EYFP	1	1	-0.183702
0.935673	GtACR1-EYFP	1	1	-0.199409
1.05263	GtACR1-EYFP	1	1	-0.212957
1.16959	GtACR1-EYFP	1	1	-0.225295
1.28655	GtACR1-EYFP	1	1	-0.235295
1.40351	GtACR1-EYFP	1	1	-0.245516
1.52047	GtACR1-EYFP	1	1	-0.251498
1.63743	GtACR1-EYFP	1	1	-0.259458
1.75439	GtACR1-EYFP	1	1	-0.266608
1.87135	GtACR1-EYFP	1	1	-0.272933
1.9883	GtACR1-EYFP	1	1	-0.278559
2.10526	GtACR1-EYFP	1	1	-0.282724
2.22222	GtACR1-EYFP	1	1	-0.287925
2.33918	GtACR1-EYFP	1	1	-0.291385
2.45614	GtACR1-EYFP	1	1	-0.295238
2.5731	GtACR1-EYFP	1	1	-0.298417
2.69006	GtACR1-EYFP	1	1	-0.300947
2.80702	GtACR1-EYFP	1	1	-0.304212
2.92398	GtACR1-EYFP	1	1	-0.306616
3.04094	GtACR1-EYFP	1	1	-0.308348
3.15789	GtACR1-EYFP	1	1	-0.309271
3.27485	GtACR1-EYFP	1	1	-0.312177
3.39181	GtACR1-EYFP	1	1	-0.314059
3.50877	GtACR1-EYFP	1	1	-0.312808
3.62573	GtACR1-EYFP	1	1	-0.314331
3.74269	GtACR1-EYFP	1	1	-0.314911
3.85965	GtACR1-EYFP	1	1	-0.315544
3.97661	GtACR1-EYFP	1	1	-0.316845
4.09357	GtACR1-EYFP	1	1	-0.317388
4.21053	GtACR1-EYFP	1	1	-0.318062
4.32749	GtACR1-EYFP	1	1	-0.318392
4.44444	GtACR1-EYFP	1	1	-0.319306
4.5614	GtACR1-EYFP	1	1	-0.319847
4.67836	GtACR1-EYFP	1	1	-0.319983
4.79532	GtACR1-EYFP	1	1	-0.320948
4.91228	GtACR1-EYFP	1	1	-0.321015
5.02924	GtACR1-EYFP	1	1	-0.321957
5.1462	GtACR1-EYFP	1	1	-0.321127
5.26316	GtACR1-EYFP	1	1	-0.32196
5.38012	GtACR1-EYFP	1	1	-0.321961
5.49708	GtACR1-EYFP	1	1	-0.322195
5.61404	GtACR1-EYFP	1	1	-0.321199
5.73099	GtACR1-EYFP	1	1	-0.320087
5.84795	GtACR1-EYFP	1	1	-0.32557
5.96491	GtACR1-EYFP	1	1	-0.324737
6.08187	GtACR1-EYFP	1	1	-0.324166
6.19883	GtACR1-EYFP	1	1	-0.323825
6.31579	GtACR1-EYFP	1	1	-0.323685
6.43275	GtACR1-EYFP	1	1	-0.323483
6.54971	GtACR1-EYFP	1	1	-0.323271
6.66667	GtACR1-EYFP	1	1	-0.323543
6.78363	GtACR1-EYFP	1	1	-0.323615
6.90058	GtACR1-EYFP	1	1	-0.323652
7.01754	GtACR1-EYFP	1	1	-0.323013
7.1345	GtACR1-EYFP	1	1	-0.323098
7.25146	GtACR1-EYFP	1	1	-0.322487
7.36842	GtACR1-EYFP	1	1	-0.322989
7.48538	GtACR1-EYFP	1	1	-0.322303
7.60234	GtACR1-EYFP	1	1	-0.322354
7.7193	GtACR1-EYFP	1	1	-0.322484
7.83626	GtACR1-EYFP	1	1	-0.32127
7.95322	GtACR1-EYFP	1	1	-0.321501
8.07018	GtACR1-EYFP	1	1	-0.321056
8.18713	GtACR1-EYFP	1	1	-0.321046
8.30409	GtACR1-EYFP	1	1	-0.320323
8.42105	GtACR1-EYFP	1	1	-0.319995
8.53801	GtACR1-EYFP	1	1	-0.320007
8.65497	GtACR1-EYFP	1	1	-0.320005
8.77193	GtACR1-EYFP	1	1	-0.319642
8.88889	GtACR1-EYFP	1	1	-0.319653
9.00585	GtACR1-EYFP	1	1	-0.318891
9.12281	GtACR1-EYFP	1	1	-0.318413
9.23977	GtACR1-EYFP	1	1	-0.318708
9.35673	GtACR1-EYFP	1	1	-0.318637
9.47368	GtACR1-EYFP	1	1	-0.318515
9.59064	GtACR1-EYFP	1	1	-0.318162
9.7076	GtACR1-EYFP	1	1	-0.316972
9.82456	GtACR1-EYFP	1	1	-0.317057
9.94152	GtACR1-EYFP	1	1	-0.312639
10.0585	GtACR1-EYFP	1	1	-0.315387
10.1754	GtACR1-EYFP	1	1	-0.315503
10.2924	GtACR1-EYFP	1	1	-0.315107
10.4094	GtACR1-EYFP	1	1	-0.314074
10.5263	GtACR1-EYFP	1	1	-0.313499
10.6433	GtACR1-EYFP	1	1	-0.31376
10.7602	GtACR1-EYFP	1	1	-0.313045
10.8772	GtACR1-EYFP	1	1	-0.31301
10.9942	GtACR1-EYFP	1	1	-0.31232
11.1111	GtACR1-EYFP	1	1	-0.312412
11.2281	GtACR1-EYFP	1	1	-0.312429
11.345	GtACR1-EYFP	1	1	-0.3113
11.462	GtACR1-EYFP	1	1	-0.31155
11.5789	GtACR1-EYFP	1	1	-0.311779
11.6959	GtACR1-EYFP	1	1	-0.310933
11.8129	GtACR1-EYFP	1	1	-0.31092
11.9298	GtACR1-EYFP	1	1	-0.310669
12.0468	GtACR1-EYFP	1	1	-0.310363
12.1637	GtACR1-EYFP	1	1	-0.310548
12.2807	GtACR1-EYFP	1	1	-0.30993
12.3977	GtACR1-EYFP	1	1	-0.309296
12.5146	GtACR1-EYFP	1	1	-0.308564
12.6316	GtACR1-EYFP	1	1	-0.309324
12.7485	GtACR1-EYFP	1	1	-0.308574
12.8655	GtACR1-EYFP	1	1	-0.308199
12.9825	GtACR1-EYFP	1	1	-0.307944
13.0994	GtACR1-EYFP	1	1	-0.307623
13.2164	GtACR1-EYFP	1	1	-0.307476
13.3333	GtACR1-EYFP	1	1	-0.306724
13.4503	GtACR1-EYFP	1	1	-0.30641
13.5673	GtACR1-EYFP	1	1	-0.306121
13.6842	GtACR1-EYFP	1	1	-0.306169
13.8012	GtACR1-EYFP	1	1	-0.305594
13.9181	GtACR1-EYFP	1	1	-0.305332
14.0351	GtACR1-EYFP	1	1	-0.305227
14.152	GtACR1-EYFP	1	1	-0.305151
14.269	GtACR1-EYFP	1	1	-0.305452
14.386	GtACR1-EYFP	1	1	-0.304688
14.5029	GtACR1-EYFP	1	1	-0.303897
14.6199	GtACR1-EYFP	1	1	-0.304474
14.7368	GtACR1-EYFP	1	1	-0.304065
14.8538	GtACR1-EYFP	1	1	-0.30376
14.9708	GtACR1-EYFP	1	1	-0.303477
15.0877	GtACR1-EYFP	1	1	-0.301908
15.2047	GtACR1-EYFP	1	1	-0.301679
15.3216	GtACR1-EYFP	1	1	-0.30194
15.4386	GtACR1-EYFP	1	1	-0.30139
15.5556	GtACR1-EYFP	1	1	-0.301202
15.6725	GtACR1-EYFP	1	1	-0.300849
15.7895	GtACR1-EYFP	1	1	-0.299636
15.9064	GtACR1-EYFP	1	1	-0.299421
16.0234	GtACR1-EYFP	1	1	-0.299298
16.1404	GtACR1-EYFP	1	1	-0.299362
16.2573	GtACR1-EYFP	1	1	-0.300148
16.3743	GtACR1-EYFP	1	1	-0.300546
16.4912	GtACR1-EYFP	1	1	-0.300122
16.6082	GtACR1-EYFP	1	1	-0.295424
16.7251	GtACR1-EYFP	1	1	-0.296991
16.8421	GtACR1-EYFP	1	1	-0.296449
16.9591	GtACR1-EYFP	1	1	-0.308574
17.076	GtACR1-EYFP	1	1	-0.308199
17.193	GtACR1-EYFP	1	1	-0.307944
17.3099	GtACR1-EYFP	1	1	-0.307623
17.4269	GtACR1-EYFP	1	1	-0.307476
17.5439	GtACR1-EYFP	1	1	-0.306724
17.6608	GtACR1-EYFP	1	1	-0.30641
17.7778	GtACR1-EYFP	1	1	-0.306121
17.8947	GtACR1-EYFP	1	1	-0.306169
18.0117	GtACR1-EYFP	1	1	-0.305594
18.1287	GtACR1-EYFP	1	1	-0.305332
18.2456	GtACR1-EYFP	1	1	-0.305227
18.3626	GtACR1-EYFP	1	1	-0.305151
18.4795	GtACR1-EYFP	1	1	-0.305452
18.5965	GtACR1-EYFP	1	1	-0.304688
18.7135	GtACR1-EYFP	1	1	-0.303897
18.8304	GtACR1-EYFP	1	1	-0.304474
18.9474	GtACR1-EYFP	1	1	-0.304065
19.0643	GtACR1-EYFP	1	1	-0.30376
19.1813	GtACR1-EYFP	1	1	-0.303477
19.2982	GtACR1-EYFP	1	1	-0.301908
19.4152	GtACR1-EYFP	1	1	-0.301679
19.5322	GtACR1-EYFP	1	1	-0.30194
19.6491	GtACR1-EYFP	1	1	-0.30139
19.7661	GtACR1-EYFP	1	1	-0.301202
19.883	GtACR1-EYFP	1	1	-0.300849
0	GtACR1-EYFP	1	2	0
0.116959	GtACR1-EYFP	1	2	-0.032992
0.233918	GtACR1-EYFP	1	2	-0.0614896
0.350877	GtACR1-EYFP	1	2	-0.0871236
0.467836	GtACR1-EYFP	1	2	-0.108743
0.584795	GtACR1-EYFP	1	2	-0.128413
0.701754	GtACR1-EYFP	1	2	-0.144523
0.818713	GtACR1-EYFP	1	2	-0.155097
0.935673	GtACR1-EYFP	1	2	-0.169297
1.05263	GtACR1-EYFP	1	2	-0.180448
1.16959	GtACR1-EYFP	1	2	-0.192145
1.28655	GtACR1-EYFP	1	2	-0.200491
1.40351	GtACR1-EYFP	1	2	-0.205937
1.52047	GtACR1-EYFP	1	2	-0.21153
1.63743	GtACR1-EYFP	1	2	-0.218755
1.75439	GtACR1-EYFP	1	2	-0.2235
1.87135	GtACR1-EYFP	1	2	-0.228347
1.9883	GtACR1-EYFP	1	2	-0.232181
2.10526	GtACR1-EYFP	1	2	-0.234811
2.22222	GtACR1-EYFP	1	2	-0.237636
2.33918	GtACR1-EYFP	1	2	-0.241766
2.45614	GtACR1-EYFP	1	2	-0.244979
2.5731	GtACR1-EYFP	1	2	-0.246941
2.69006	GtACR1-EYFP	1	2	-0.249017
2.80702	GtACR1-EYFP	1	2	-0.250702
2.92398	GtACR1-EYFP	1	2	-0.251882
3.04094	GtACR1-EYFP	1	2	-0.253606
3.15789	GtACR1-EYFP	1	2	-0.254829
3.27485	GtACR1-EYFP	1	2	-0.256012
3.39181	GtACR1-EYFP	1	2	-0.256565
3.50877	GtACR1-EYFP	1	2	-0.256962
3.62573	GtACR1-EYFP	1	2	-0.257455
3.74269	GtACR1-EYFP	1	2	-0.258029
3.85965	GtACR1-EYFP	1	2	-0.2586
3.97661	GtACR1-EYFP	1	2	-0.259192
4.09357	GtACR1-EYFP	1	2	-0.259603
4.21053	GtACR1-EYFP	1	2	-0.260337
4.32749	GtACR1-EYFP	1	2	-0.260293
4.44444	GtACR1-EYFP	1	2	-0.260217
4.5614	GtACR1-EYFP	1	2	-0.260867
4.67836	GtACR1-EYFP	1	2	-0.2608
4.79532	GtACR1-EYFP	1	2	-0.26015
4.91228	GtACR1-EYFP	1	2	-0.260899
5.02924	GtACR1-EYFP	1	2	-0.259782
5.1462	GtACR1-EYFP	1	2	-0.259991
5.26316	GtACR1-EYFP	1	2	-0.259911
5.38012	GtACR1-EYFP	1	2	-0.260221
5.49708	GtACR1-EYFP	1	2	-0.26058
5.61404	GtACR1-EYFP	1	2	-0.26058
5.73099	GtACR1-EYFP	1	2	-0.259615
5.84795	GtACR1-EYFP	1	2	-0.259242
5.96491	GtACR1-EYFP	1	2	-0.256186
6.08187	GtACR1-EYFP	1	2	-0.255063
6.19883	GtACR1-EYFP	1	2	-0.255124
6.31579	GtACR1-EYFP	1	2	-0.25461
6.43275	GtACR1-EYFP	1	2	-0.254353
6.54971	GtACR1-EYFP	1	2	-0.254136
6.66667	GtACR1-EYFP	1	2	-0.253607
6.78363	GtACR1-EYFP	1	2	-0.253295
6.90058	GtACR1-EYFP	1	2	-0.252577
7.01754	GtACR1-EYFP	1	2	-0.251998
7.1345	GtACR1-EYFP	1	2	-0.253281
7.25146	GtACR1-EYFP	1	2	-0.252976
7.36842	GtACR1-EYFP	1	2	-0.251821
7.48538	GtACR1-EYFP	1	2	-0.25368
7.60234	GtACR1-EYFP	1	2	-0.251675
7.7193	GtACR1-EYFP	1	2	-0.251921
7.83626	GtACR1-EYFP	1	2	-0.251021
7.95322	GtACR1-EYFP	1	2	-0.252578
8.07018	GtACR1-EYFP	1	2	-0.251376
8.18713	GtACR1-EYFP	1	2	-0.251291
8.30409	GtACR1-EYFP	1	2	-0.251565
8.42105	GtACR1-EYFP	1	2	-0.251037
8.53801	GtACR1-EYFP	1	2	-0.250277
8.65497	GtACR1-EYFP	1	2	-0.250584
8.77193	GtACR1-EYFP	1	2	-0.249469
8.88889	GtACR1-EYFP	1	2	-0.249077
9.00585	GtACR1-EYFP	1	2	-0.248516
9.12281	GtACR1-EYFP	1	2	-0.248095
9.23977	GtACR1-EYFP	1	2	-0.248423
9.35673	GtACR1-EYFP	1	2	-0.246963
9.47368	GtACR1-EYFP	1	2	-0.247247
9.59064	GtACR1-EYFP	1	2	-0.247026
9.7076	GtACR1-EYFP	1	2	-0.245617
9.82456	GtACR1-EYFP	1	2	-0.245063
9.94152	GtACR1-EYFP	1	2	-0.243651
10.0585	GtACR1-EYFP	1	2	-0.243517
10.1754	GtACR1-EYFP	1	2	-0.243508
10.2924	GtACR1-EYFP	1	2	-0.2429
10.4094	GtACR1-EYFP	1	2	-0.242743
10.5263	GtACR1-EYFP	1	2	-0.242099
10.6433	GtACR1-EYFP	1	2	-0.24143
10.7602	GtACR1-EYFP	1	2	-0.241741
10.8772	GtACR1-EYFP	1	2	-0.240569
10.9942	GtACR1-EYFP	1	2	-0.239231
11.1111	GtACR1-EYFP	1	2	-0.239299
11.2281	GtACR1-EYFP	1	2	-0.23987
11.345	GtACR1-EYFP	1	2	-0.240297
11.462	GtACR1-EYFP	1	2	-0.240319
11.5789	GtACR1-EYFP	1	2	-0.240243
11.6959	GtACR1-EYFP	1	2	-0.240024
11.8129	GtACR1-EYFP	1	2	-0.239726
11.9298	GtACR1-EYFP	1	2	-0.239295
12.0468	GtACR1-EYFP	1	2	-0.237641
12.1637	GtACR1-EYFP	1	2	-0.23726
12.2807	GtACR1-EYFP	1	2	-0.237208
12.3977	GtACR1-EYFP	1	2	-0.236057
12.5146	GtACR1-EYFP	1	2	-0.236466
12.6316	GtACR1-EYFP	1	2	-0.234558
12.7485	GtACR1-EYFP	1	2	-0.234354
12.8655	GtACR1-EYFP	1	2	-0.23415
12.9825	GtACR1-EYFP	1	2	-0.232203
13.0994	GtACR1-EYFP	1	2	-0.23066
13.2164	GtACR1-EYFP	1	2	-0.231391
13.3333	GtACR1-EYFP	1	2	-0.230763
13.4503	GtACR1-EYFP	1	2	-0.230055
13.5673	GtACR1-EYFP	1	2	-0.229718
13.6842	GtACR1-EYFP	1	2	-0.232199
13.8012	GtACR1-EYFP	1	2	-0.231619
13.9181	GtACR1-EYFP	1	2	-0.231032
14.0351	GtACR1-EYFP	1	2	-0.230162
14.152	GtACR1-EYFP	1	2	-0.229237
14.269	GtACR1-EYFP	1	2	-0.229285
14.386	GtACR1-EYFP	1	2	-0.228203
14.5029	GtACR1-EYFP	1	2	-0.228884
14.6199	GtACR1-EYFP	1	2	-0.227861
14.7368	GtACR1-EYFP	1	2	-0.229331
14.8538	GtACR1-EYFP	1	2	-0.227458
14.9708	GtACR1-EYFP	1	2	-0.227149
15.0877	GtACR1-EYFP	1	2	-0.226462
15.2047	GtACR1-EYFP	1	2	-0.226178
15.3216	GtACR1-EYFP	1	2	-0.226673
15.4386	GtACR1-EYFP	1	2	-0.225819
15.5556	GtACR1-EYFP	1	2	-0.224882
15.6725	GtACR1-EYFP	1	2	-0.220939
15.7895	GtACR1-EYFP	1	2	-0.221615
15.9064	GtACR1-EYFP	1	2	-0.221853
16.0234	GtACR1-EYFP	1	2	-0.221681
16.1404	GtACR1-EYFP	1	2	-0.2216
16.2573	GtACR1-EYFP	1	2	-0.22173
16.3743	GtACR1-EYFP	1	2	-0.222033
16.4912	GtACR1-EYFP	1	2	-0.221134
16.6082	GtACR1-EYFP	1	2	-0.220422
16.7251	GtACR1-EYFP	1	2	-0.221406
16.8421	GtACR1-EYFP	1	2	-0.220431
16.9591	GtACR1-EYFP	1	2	-0.21991
17.076	GtACR1-EYFP	1	2	-0.220173
17.193	GtACR1-EYFP	1	2	-0.220498
17.3099	GtACR1-EYFP	1	2	-0.217904
17.4269	GtACR1-EYFP	1	2	-0.217353
17.5439	GtACR1-EYFP	1	2	-0.218504
17.6608	GtACR1-EYFP	1	2	-0.219478
17.7778	GtACR1-EYFP	1	2	-0.219622
17.8947	GtACR1-EYFP	1	2	-0.21946
18.0117	GtACR1-EYFP	1	2	-0.218613
18.1287	GtACR1-EYFP	1	2	-0.218314
18.2456	GtACR1-EYFP	1	2	-0.218352
18.3626	GtACR1-EYFP	1	2	-0.217894
18.4795	GtACR1-EYFP	1	2	-0.217302
18.5965	GtACR1-EYFP	1	2	-0.217099
18.7135	GtACR1-EYFP	1	2	-0.217016
18.8304	GtACR1-EYFP	1	2	-0.213062
18.9474	GtACR1-EYFP	1	2	-0.213317
19.0643	GtACR1-EYFP	1	2	-0.214585
19.1813	GtACR1-EYFP	1	2	-0.214615
19.2982	GtACR1-EYFP	1	2	-0.214327
19.4152	GtACR1-EYFP	1	2	-0.214336
19.5322	GtACR1-EYFP	1	2	-0.213534
19.6491	GtACR1-EYFP	1	2	-0.212687
19.7661	GtACR1-EYFP	1	2	-0.212727
19.883	GtACR1-EYFP	1	2	-0.212625
0	GtACR1-EYFP	1	3	0
0.116959	GtACR1-EYFP	1	3	-0.0292678
0.233918	GtACR1-EYFP	1	3	-0.0649459
0.350877	GtACR1-EYFP	1	3	-0.0907052
0.467836	GtACR1-EYFP	1	3	-0.114158
0.584795	GtACR1-EYFP	1	3	-0.133528
0.701754	GtACR1-EYFP	1	3	-0.15185
0.818713	GtACR1-EYFP	1	3	-0.167266
0.935673	GtACR1-EYFP	1	3	-0.179617
1.05263	GtACR1-EYFP	1	3	-0.191462
1.16959	GtACR1-EYFP	1	3	-0.201289
1.28655	GtACR1-EYFP	1	3	-0.210658
1.40351	GtACR1-EYFP	1	3	-0.217521
1.52047	GtACR1-EYFP	1	3	-0.223371
1.63743	GtACR1-EYFP	1	3	-0.230891
1.75439	GtACR1-EYFP	1	3	-0.236497
1.87135	GtACR1-EYFP	1	3	-0.241527
1.9883	GtACR1-EYFP	1	3	-0.248946
2.10526	GtACR1-EYFP	1	3	-0.253759
2.22222	GtACR1-EYFP	1	3	-0.257465
2.33918	GtACR1-EYFP	1	3	-0.260477
2.45614	GtACR1-EYFP	1	3	-0.264215
2.5731	GtACR1-EYFP	1	3	-0.267218
2.69006	GtACR1-EYFP	1	3	-0.269692
2.80702	GtACR1-EYFP	1	3	-0.271107
2.92398	GtACR1-EYFP	1	3	-0.272538
3.04094	GtACR1-EYFP	1	3	-0.27528
3.15789	GtACR1-EYFP	1	3	-0.276934
3.27485	GtACR1-EYFP	1	3	-0.278391
3.39181	GtACR1-EYFP	1	3	-0.279238
3.50877	GtACR1-EYFP	1	3	-0.280557
3.62573	GtACR1-EYFP	1	3	-0.281088
3.74269	GtACR1-EYFP	1	3	-0.281588
3.85965	GtACR1-EYFP	1	3	-0.282378
3.97661	GtACR1-EYFP	1	3	-0.283316
4.09357	GtACR1-EYFP	1	3	-0.283983
4.21053	GtACR1-EYFP	1	3	-0.284473
4.32749	GtACR1-EYFP	1	3	-0.284275
4.44444	GtACR1-EYFP	1	3	-0.284433
4.5614	GtACR1-EYFP	1	3	-0.285843
4.67836	GtACR1-EYFP	1	3	-0.286415
4.79532	GtACR1-EYFP	1	3	-0.286424
4.91228	GtACR1-EYFP	1	3	-0.286453
5.02924	GtACR1-EYFP	1	3	-0.286356
5.1462	GtACR1-EYFP	1	3	-0.28614
5.26316	GtACR1-EYFP	1	3	-0.286546
5.38012	GtACR1-EYFP	1	3	-0.286342
5.49708	GtACR1-EYFP	1	3	-0.285203
5.61404	GtACR1-EYFP	1	3	-0.283635
5.73099	GtACR1-EYFP	1	3	-0.282411
5.84795	GtACR1-EYFP	1	3	-0.283924
5.96491	GtACR1-EYFP	1	3	-0.284869
6.08187	GtACR1-EYFP	1	3	-0.283306
6.19883	GtACR1-EYFP	1	3	-0.284514
6.31579	GtACR1-EYFP	1	3	-0.284669
6.43275	GtACR1-EYFP	1	3	-0.282349
6.54971	GtACR1-EYFP	1	3	-0.285512
6.66667	GtACR1-EYFP	1	3	-0.284764
6.78363	GtACR1-EYFP	1	3	-0.28454
6.90058	GtACR1-EYFP	1	3	-0.284175
7.01754	GtACR1-EYFP	1	3	-0.283837
7.1345	GtACR1-EYFP	1	3	-0.283755
7.25146	GtACR1-EYFP	1	3	-0.282463
7.36842	GtACR1-EYFP	1	3	-0.282652
7.48538	GtACR1-EYFP	1	3	-0.282179
7.60234	GtACR1-EYFP	1	3	-0.282259
7.7193	GtACR1-EYFP	1	3	-0.282096
7.83626	GtACR1-EYFP	1	3	-0.281031
7.95322	GtACR1-EYFP	1	3	-0.277043
8.07018	GtACR1-EYFP	1	3	-0.278772
8.18713	GtACR1-EYFP	1	3	-0.278844
8.30409	GtACR1-EYFP	1	3	-0.279725
8.42105	GtACR1-EYFP	1	3	-0.278857
8.53801	GtACR1-EYFP	1	3	-0.27862
8.65497	GtACR1-EYFP	1	3	-0.278409
8.77193	GtACR1-EYFP	1	3	-0.277857
8.88889	GtACR1-EYFP	1	3	-0.27753
9.00585	GtACR1-EYFP	1	3	-0.276577
9.12281	GtACR1-EYFP	1	3	-0.277493
9.23977	GtACR1-EYFP	1	3	-0.276648
9.35673	GtACR1-EYFP	1	3	-0.275427
9.47368	GtACR1-EYFP	1	3	-0.274897
9.59064	GtACR1-EYFP	1	3	-0.274219
9.7076	GtACR1-EYFP	1	3	-0.27393
9.82456	GtACR1-EYFP	1	3	-0.273579
9.94152	GtACR1-EYFP	1	3	-0.272485
10.0585	GtACR1-EYFP	1	3	-0.272977
10.1754	GtACR1-EYFP	1	3	-0.271958
10.2924	GtACR1-EYFP	1	3	-0.27012
10.4094	GtACR1-EYFP	1	3	-0.269512
10.5263	GtACR1-EYFP	1	3	-0.269296
10.6433	GtACR1-EYFP	1	3	-0.269867
10.7602	GtACR1-EYFP	1	3	-0.269694
10.8772	GtACR1-EYFP	1	3	-0.268811
10.9942	GtACR1-EYFP	1	3	-0.268993
11.1111	GtACR1-EYFP	1	3	-0.268366
11.2281	GtACR1-EYFP	1	3	-0.266885
11.345	GtACR1-EYFP	1	3	-0.266343
11.462	GtACR1-EYFP	1	3	-0.266696
11.5789	GtACR1-EYFP	1	3	-0.266357
11.6959	GtACR1-EYFP	1	3	-0.265145
11.8129	GtACR1-EYFP	1	3	-0.265672
11.9298	GtACR1-EYFP	1	3	-0.265015
12.0468	GtACR1-EYFP	1	3	-0.263841
12.1637	GtACR1-EYFP	1	3	-0.263282
12.2807	GtACR1-EYFP	1	3	-0.26383
12.3977	GtACR1-EYFP	1	3	-0.261444
12.5146	GtACR1-EYFP	1	3	-0.260216
12.6316	GtACR1-EYFP	1	3	-0.259658
12.7485	GtACR1-EYFP	1	3	-0.257783
12.8655	GtACR1-EYFP	1	3	-0.25897
12.9825	GtACR1-EYFP	1	3	-0.262138
13.0994	GtACR1-EYFP	1	3	-0.261237
13.2164	GtACR1-EYFP	1	3	-0.261339
13.3333	GtACR1-EYFP	1	3	-0.260406
13.4503	GtACR1-EYFP	1	3	-0.259226
13.5673	GtACR1-EYFP	1	3	-0.258905
13.6842	GtACR1-EYFP	1	3	-0.258895
13.8012	GtACR1-EYFP	1	3	-0.258307
13.9181	GtACR1-EYFP	1	3	-0.257244
14.0351	GtACR1-EYFP	1	3	-0.25737
14.152	GtACR1-EYFP	1	3	-0.255895
14.269	GtACR1-EYFP	1	3	-0.255087
14.386	GtACR1-EYFP	1	3	-0.254021
14.5029	GtACR1-EYFP	1	3	-0.255155
14.6199	GtACR1-EYFP	1	3	-0.25495
14.7368	GtACR1-EYFP	1	3	-0.254033
14.8538	GtACR1-EYFP	1	3	-0.25403
14.9708	GtACR1-EYFP	1	3	-0.253848
15.0877	GtACR1-EYFP	1	3	-0.253366
15.2047	GtACR1-EYFP	1	3	-0.252696
15.3216	GtACR1-EYFP	1	3	-0.251994
15.4386	GtACR1-EYFP	1	3	-0.249969
15.5556	GtACR1-EYFP	1	3	-0.249682
15.6725	GtACR1-EYFP	1	3	-0.249067
15.7895	GtACR1-EYFP	1	3	-0.248731
15.9064	GtACR1-EYFP	1	3	-0.248003
16.0234	GtACR1-EYFP	1	3	-0.248502
16.1404	GtACR1-EYFP	1	3	-0.247676
16.2573	GtACR1-EYFP	1	3	-0.247652
16.3743	GtACR1-EYFP	1	3	-0.246574
16.4912	GtACR1-EYFP	1	3	-0.247858
16.6082	GtACR1-EYFP	1	3	-0.247153
16.7251	GtACR1-EYFP	1	3	-0.246345
16.8421	GtACR1-EYFP	1	3	-0.246252
16.9591	GtACR1-EYFP	1	3	-0.245453
17.076	GtACR1-EYFP	1	3	-0.24529
17.193	GtACR1-EYFP	1	3	-0.245234
17.3099	GtACR1-EYFP	1	3	-0.24476
17.4269	GtACR1-EYFP	1	3	-0.244187
17.5439	GtACR1-EYFP	1	3	-0.243627
17.6608	GtACR1-EYFP	1	3	-0.243338
17.7778	GtACR1-EYFP	1	3	-0.242436
17.8947	GtACR1-EYFP	1	3	-0.242744
18.0117	GtACR1-EYFP	1	3	-0.241638
18.1287	GtACR1-EYFP	1	3	-0.240864
18.2456	GtACR1-EYFP	1	3	-0.240677
18.3626	GtACR1-EYFP	1	3	-0.241479
18.4795	GtACR1-EYFP	1	3	-0.238156
18.5965	GtACR1-EYFP	1	3	-0.239688
18.7135	GtACR1-EYFP	1	3	-0.239334
18.8304	GtACR1-EYFP	1	3	-0.239529
18.9474	GtACR1-EYFP	1	3	-0.238553
19.0643	GtACR1-EYFP	1	3	-0.238662
19.1813	GtACR1-EYFP	1	3	-0.236924
19.2982	GtACR1-EYFP	1	3	-0.236007
19.4152	GtACR1-EYFP	1	3	-0.235942
19.5322	GtACR1-EYFP	1	3	-0.23645
19.6491	GtACR1-EYFP	1	3	-0.236035
19.7661	GtACR1-EYFP	1	3	-0.235578
19.883	GtACR1-EYFP	1	3	-0.235483
0	GtACR1-EYFP	2	1	0
0.116959	GtACR1-EYFP	2	1	-0.0394052
0.233918	GtACR1-EYFP	2	1	-0.0622352
0.350877	GtACR1-EYFP	2	1	-0.0858263
0.467836	GtACR1-EYFP	2	1	-0.106709
0.584795	GtACR1-EYFP	2	1	-0.129164
0.701754	GtACR1-EYFP	2	1	-0.148303
0.818713	GtACR1-EYFP	2	1	-0.163799
0.935673	GtACR1-EYFP	2	1	-0.176499
1.05263	GtACR1-EYFP	2	1	-0.186674
1.16959	GtACR1-EYFP	2	1	-0.199697
1.28655	GtACR1-EYFP	2	1	-0.206427
1.40351	GtACR1-EYFP	2	1	-0.216957
1.52047	GtACR1-EYFP	2	1	-0.222844
1.63743	GtACR1-EYFP	2	1	-0.231135
1.75439	GtACR1-EYFP	2	1	-0.237459
1.87135	GtACR1-EYFP	2	1	-0.243422
1.9883	GtACR1-EYFP	2	1	-0.247342
2.10526	GtACR1-EYFP	2	1	-0.251066
2.22222	GtACR1-EYFP	2	1	-0.253914
2.33918	GtACR1-EYFP	2	1	-0.25503
2.45614	GtACR1-EYFP	2	1	-0.263004
2.5731	GtACR1-EYFP	2	1	-0.26242
2.69006	GtACR1-EYFP	2	1	-0.264596
2.80702	GtACR1-EYFP	2	1	-0.266931
2.92398	GtACR1-EYFP	2	1	-0.265516
3.04094	GtACR1-EYFP	2	1	-0.270648
3.15789	GtACR1-EYFP	2	1	-0.27099
3.27485	GtACR1-EYFP	2	1	-0.274879
3.39181	GtACR1-EYFP	2	1	-0.275431
3.50877	GtACR1-EYFP	2	1	-0.275742
3.62573	GtACR1-EYFP	2	1	-0.273534
3.74269	GtACR1-EYFP	2	1	-0.273877
3.85965	GtACR1-EYFP	2	1	-0.277042
3.97661	GtACR1-EYFP	2	1	-0.273686
4.09357	GtACR1-EYFP	2	1	-0.275868
4.21053	GtACR1-EYFP	2	1	-0.277549
4.32749	GtACR1-EYFP	2	1	-0.275792
4.44444	GtACR1-EYFP	2	1	-0.276344
4.5614	GtACR1-EYFP	2	1	-0.276452
4.67836	GtACR1-EYFP	2	1	-0.276592
4.79532	GtACR1-EYFP	2	1	-0.273693
4.91228	GtACR1-EYFP	2	1	-0.272202
5.02924	GtACR1-EYFP	2	1	-0.273001
5.1462	GtACR1-EYFP	2	1	-0.27578
5.26316	GtACR1-EYFP	2	1	-0.273249
5.38012	GtACR1-EYFP	2	1	-0.275615
5.49708	GtACR1-EYFP	2	1	-0.272633
5.61404	GtACR1-EYFP	2	1	-0.271878
5.73099	GtACR1-EYFP	2	1	-0.272164
5.84795	GtACR1-EYFP	2	1	-0.271231
5.96491	GtACR1-EYFP	2	1	-0.268187
6.08187	GtACR1-EYFP	2	1	-0.266011
6.19883	GtACR1-EYFP	2	1	-0.280391
6.31579	GtACR1-EYFP	2	1	-0.265776
6.43275	GtACR1-EYFP	2	1	-0.268821
6.54971	GtACR1-EYFP	2	1	-0.264856
6.66667	GtACR1-EYFP	2	1	-0.263955
6.78363	GtACR1-EYFP	2	1	-0.262332
6.90058	GtACR1-EYFP	2	1	-0.26098
7.01754	GtACR1-EYFP	2	1	-0.260251
7.1345	GtACR1-EYFP	2	1	-0.260765
7.25146	GtACR1-EYFP	2	1	-0.258741
7.36842	GtACR1-EYFP	2	1	-0.260327
7.48538	GtACR1-EYFP	2	1	-0.25673
7.60234	GtACR1-EYFP	2	1	-0.257847
7.7193	GtACR1-EYFP	2	1	-0.256572
7.83626	GtACR1-EYFP	2	1	-0.252011
7.95322	GtACR1-EYFP	2	1	-0.252747
8.07018	GtACR1-EYFP	2	1	-0.252671
8.18713	GtACR1-EYFP	2	1	-0.248427
8.30409	GtACR1-EYFP	2	1	-0.248427
8.42105	GtACR1-EYFP	2	1	-0.24693
8.53801	GtACR1-EYFP	2	1	-0.246543
8.65497	GtACR1-EYFP	2	1	-0.242578
8.77193	GtACR1-EYFP	2	1	-0.246866
8.88889	GtACR1-EYFP	2	1	-0.242883
9.00585	GtACR1-EYFP	2	1	-0.243809
9.12281	GtACR1-EYFP	2	1	-0.250152
9.23977	GtACR1-EYFP	2	1	-0.246054
9.35673	GtACR1-EYFP	2	1	-0.244253
9.47368	GtACR1-EYFP	2	1	-0.244132
9.59064	GtACR1-EYFP	2	1	-0.240891
9.7076	GtACR1-EYFP	2	1	-0.240682
9.82456	GtACR1-EYFP	2	1	-0.236901
9.94152	GtACR1-EYFP	2	1	-0.23881
10.0585	GtACR1-EYFP	2	1	-0.237719
10.1754	GtACR1-EYFP	2	1	-0.23529
10.2924	GtACR1-EYFP	2	1	-0.236869
10.4094	GtACR1-EYFP	2	1	-0.235734
10.5263	GtACR1-EYFP	2	1	-0.234287
10.6433	GtACR1-EYFP	2	1	-0.233019
10.7602	GtACR1-EYFP	2	1	-0.232759
10.8772	GtACR1-EYFP	2	1	-0.230944
10.9942	GtACR1-EYFP	2	1	-0.229213
11.1111	GtACR1-EYFP	2	1	-0.228236
11.2281	GtACR1-EYFP	2	1	-0.227031
11.345	GtACR1-EYFP	2	1	-0.225394
11.462	GtACR1-EYFP	2	1	-0.223332
11.5789	GtACR1-EYFP	2	1	-0.223478
11.6959	GtACR1-EYFP	2	1	-0.223244
11.8129	GtACR1-EYFP	2	1	-0.223897
11.9298	GtACR1-EYFP	2	1	-0.224601
12.0468	GtACR1-EYFP	2	1	-0.218587
12.1637	GtACR1-EYFP	2	1	-0.216811
12.2807	GtACR1-EYFP	2	1	-0.21879
12.3977	GtACR1-EYFP	2	1	-0.218568
12.5146	GtACR1-EYFP	2	1	-0.216304
12.6316	GtACR1-EYFP	2	1	-0.21416
12.7485	GtACR1-EYFP	2	1	-0.215486
12.8655	GtACR1-EYFP	2	1	-0.215524
12.9825	GtACR1-EYFP	2	1	-0.212098
13.0994	GtACR1-EYFP	2	1	-0.211457
13.2164	GtACR1-EYFP	2	1	-0.213468
13.3333	GtACR1-EYFP	2	1	-0.213132
13.4503	GtACR1-EYFP	2	1	-0.208159
13.5673	GtACR1-EYFP	2	1	-0.211102
13.6842	GtACR1-EYFP	2	1	-0.209497
13.8012	GtACR1-EYFP	2	1	-0.206598
13.9181	GtACR1-EYFP	2	1	-0.207315
14.0351	GtACR1-EYFP	2	1	-0.211775
14.152	GtACR1-EYFP	2	1	-0.20415
14.269	GtACR1-EYFP	2	1	-0.207512
14.386	GtACR1-EYFP	2	1	-0.2046
14.5029	GtACR1-EYFP	2	1	-0.203065
14.6199	GtACR1-EYFP	2	1	-0.202126
14.7368	GtACR1-EYFP	2	1	-0.200807
14.8538	GtACR1-EYFP	2	1	-0.20146
14.9708	GtACR1-EYFP	2	1	-0.201689
15.0877	GtACR1-EYFP	2	1	-0.200192
15.2047	GtACR1-EYFP	2	1	-0.200433
15.3216	GtACR1-EYFP	2	1	-0.196398
15.4386	GtACR1-EYFP	2	1	-0.200934
15.5556	GtACR1-EYFP	2	1	-0.199551
15.6725	GtACR1-EYFP	2	1	-0.196087
15.7895	GtACR1-EYFP	2	1	-0.197293
15.9064	GtACR1-EYFP	2	1	-0.19669
16.0234	GtACR1-EYFP	2	1	-0.193734
16.1404	GtACR1-EYFP	2	1	-0.193404
16.2573	GtACR1-EYFP	2	1	-0.197331
16.3743	GtACR1-EYFP	2	1	-0.19655
16.4912	GtACR1-EYFP	2	1	-0.195834
16.6082	GtACR1-EYFP	2	1	-0.192503
16.7251	GtACR1-EYFP	2	1	-0.192453
16.8421	GtACR1-EYFP	2	1	-0.191228
16.9591	GtACR1-EYFP	2	1	-0.189909
17.076	GtACR1-EYFP	2	1	-0.189002
17.193	GtACR1-EYFP	2	1	-0.189617
17.3099	GtACR1-EYFP	2	1	-0.18838
17.4269	GtACR1-EYFP	2	1	-0.185177
17.5439	GtACR1-EYFP	2	1	-0.188152
17.6608	GtACR1-EYFP	2	1	-0.185285
17.7778	GtACR1-EYFP	2	1	-0.184403
17.8947	GtACR1-EYFP	2	1	-0.18864
18.0117	GtACR1-EYFP	2	1	-0.182018
18.1287	GtACR1-EYFP	2	1	-0.180001
18.2456	GtACR1-EYFP	2	1	-0.183337
18.3626	GtACR1-EYFP	2	1	-0.181777
18.4795	GtACR1-EYFP	2	1	-0.180793
18.5965	GtACR1-EYFP	2	1	-0.181751
18.7135	GtACR1-EYFP	2	1	-0.180565
18.8304	GtACR1-EYFP	2	1	-0.181022
18.9474	GtACR1-EYFP	2	1	-0.179208
19.0643	GtACR1-EYFP	2	1	-0.180051
19.1813	GtACR1-EYFP	2	1	-0.178262
19.2982	GtACR1-EYFP	2	1	-0.178034
19.4152	GtACR1-EYFP	2	1	-0.175059
19.5322	GtACR1-EYFP	2	1	-0.178472
19.6491	GtACR1-EYFP	2	1	-0.175966
19.7661	GtACR1-EYFP	2	1	-0.176575
19.883	GtACR1-EYFP	2	1	-0.173112
0	GtACR1-EYFP	2	2	0
0.116959	GtACR1-EYFP	2	2	-0.0237332
0.233918	GtACR1-EYFP	2	2	-0.055008
0.350877	GtACR1-EYFP	2	2	-0.0804172
0.467836	GtACR1-EYFP	2	2	-0.104331
0.584795	GtACR1-EYFP	2	2	-0.128103
0.701754	GtACR1-EYFP	2	2	-0.148375
0.818713	GtACR1-EYFP	2	2	-0.167351
0.935673	GtACR1-EYFP	2	2	-0.181274
1.05263	GtACR1-EYFP	2	2	-0.196615
1.16959	GtACR1-EYFP	2	2	-0.208011
1.28655	GtACR1-EYFP	2	2	-0.223371
1.40351	GtACR1-EYFP	2	2	-0.23168
1.52047	GtACR1-EYFP	2	2	-0.239344
1.63743	GtACR1-EYFP	2	2	-0.246402
1.75439	GtACR1-EYFP	2	2	-0.252835
1.87135	GtACR1-EYFP	2	2	-0.258752
1.9883	GtACR1-EYFP	2	2	-0.263889
2.10526	GtACR1-EYFP	2	2	-0.267402
2.22222	GtACR1-EYFP	2	2	-0.274563
2.33918	GtACR1-EYFP	2	2	-0.275756
2.45614	GtACR1-EYFP	2	2	-0.278701
2.5731	GtACR1-EYFP	2	2	-0.280145
2.69006	GtACR1-EYFP	2	2	-0.284818
2.80702	GtACR1-EYFP	2	2	-0.28574
2.92398	GtACR1-EYFP	2	2	-0.287223
3.04094	GtACR1-EYFP	2	2	-0.288434
3.15789	GtACR1-EYFP	2	2	-0.289485
3.27485	GtACR1-EYFP	2	2	-0.289575
3.39181	GtACR1-EYFP	2	2	-0.289859
3.50877	GtACR1-EYFP	2	2	-0.290387
3.62573	GtACR1-EYFP	2	2	-0.289498
3.74269	GtACR1-EYFP	2	2	-0.289859
3.85965	GtACR1-EYFP	2	2	-0.291116
3.97661	GtACR1-EYFP	2	2	-0.289859
4.09357	GtACR1-EYFP	2	2	-0.291296
4.21053	GtACR1-EYFP	2	2	-0.290813
4.32749	GtACR1-EYFP	2	2	-0.289337
4.44444	GtACR1-EYFP	2	2	-0.292231
4.5614	GtACR1-EYFP	2	2	-0.289272
4.67836	GtACR1-EYFP	2	2	-0.286211
4.79532	GtACR1-EYFP	2	2	-0.276059
4.91228	GtACR1-EYFP	2	2	-0.279907
5.02924	GtACR1-EYFP	2	2	-0.283046
5.1462	GtACR1-EYFP	2	2	-0.28184
5.26316	GtACR1-EYFP	2	2	-0.28099
5.38012	GtACR1-EYFP	2	2	-0.276536
5.49708	GtACR1-EYFP	2	2	-0.276684
5.61404	GtACR1-EYFP	2	2	-0.275343
5.73099	GtACR1-EYFP	2	2	-0.274222
5.84795	GtACR1-EYFP	2	2	-0.272939
5.96491	GtACR1-EYFP	2	2	-0.271469
6.08187	GtACR1-EYFP	2	2	-0.270979
6.19883	GtACR1-EYFP	2	2	-0.269516
6.31579	GtACR1-EYFP	2	2	-0.267673
6.43275	GtACR1-EYFP	2	2	-0.266893
6.54971	GtACR1-EYFP	2	2	-0.264843
6.66667	GtACR1-EYFP	2	2	-0.265011
6.78363	GtACR1-EYFP	2	2	-0.264798
6.90058	GtACR1-EYFP	2	2	-0.263096
7.01754	GtACR1-EYFP	2	2	-0.260834
7.1345	GtACR1-EYFP	2	2	-0.262097
7.25146	GtACR1-EYFP	2	2	-0.256708
7.36842	GtACR1-EYFP	2	2	-0.25667
7.48538	GtACR1-EYFP	2	2	-0.255909
7.60234	GtACR1-EYFP	2	2	-0.254407
7.7193	GtACR1-EYFP	2	2	-0.253769
7.83626	GtACR1-EYFP	2	2	-0.251887
7.95322	GtACR1-EYFP	2	2	-0.25141
8.07018	GtACR1-EYFP	2	2	-0.249386
8.18713	GtACR1-EYFP	2	2	-0.251487
8.30409	GtACR1-EYFP	2	2	-0.246311
8.42105	GtACR1-EYFP	2	2	-0.24548
8.53801	GtACR1-EYFP	2	2	-0.247485
8.65497	GtACR1-EYFP	2	2	-0.244313
8.77193	GtACR1-EYFP	2	2	-0.241148
8.88889	GtACR1-EYFP	2	2	-0.241696
9.00585	GtACR1-EYFP	2	2	-0.238396
9.12281	GtACR1-EYFP	2	2	-0.240542
9.23977	GtACR1-EYFP	2	2	-0.23799
9.35673	GtACR1-EYFP	2	2	-0.236308
9.47368	GtACR1-EYFP	2	2	-0.234413
9.59064	GtACR1-EYFP	2	2	-0.234761
9.7076	GtACR1-EYFP	2	2	-0.233407
9.82456	GtACR1-EYFP	2	2	-0.231918
9.94152	GtACR1-EYFP	2	2	-0.230887
10.0585	GtACR1-EYFP	2	2	-0.229636
10.1754	GtACR1-EYFP	2	2	-0.231286
10.2924	GtACR1-EYFP	2	2	-0.22709
10.4094	GtACR1-EYFP	2	2	-0.225924
10.5263	GtACR1-EYFP	2	2	-0.225833
10.6433	GtACR1-EYFP	2	2	-0.224796
10.7602	GtACR1-EYFP	2	2	-0.224551
10.8772	GtACR1-EYFP	2	2	-0.222333
10.9942	GtACR1-EYFP	2	2	-0.220722
11.1111	GtACR1-EYFP	2	2	-0.220535
11.2281	GtACR1-EYFP	2	2	-0.219806
11.345	GtACR1-EYFP	2	2	-0.218575
11.462	GtACR1-EYFP	2	2	-0.216964
11.5789	GtACR1-EYFP	2	2	-0.218666
11.6959	GtACR1-EYFP	2	2	-0.214966
11.8129	GtACR1-EYFP	2	2	-0.21398
11.9298	GtACR1-EYFP	2	2	-0.216281
12.0468	GtACR1-EYFP	2	2	-0.214128
12.1637	GtACR1-EYFP	2	2	-0.21271
12.2807	GtACR1-EYFP	2	2	-0.211363
12.3977	GtACR1-EYFP	2	2	-0.211491
12.5146	GtACR1-EYFP	2	2	-0.20843
12.6316	GtACR1-EYFP	2	2	-0.206896
12.7485	GtACR1-EYFP	2	2	-0.209642
12.8655	GtACR1-EYFP	2	2	-0.207779
12.9825	GtACR1-EYFP	2	2	-0.207012
13.0994	GtACR1-EYFP	2	2	-0.205877
13.2164	GtACR1-EYFP	2	2	-0.204272
13.3333	GtACR1-EYFP	2	2	-0.204685
13.4503	GtACR1-EYFP	2	2	-0.203673
13.5673	GtACR1-EYFP	2	2	-0.203054
13.6842	GtACR1-EYFP	2	2	-0.202319
13.8012	GtACR1-EYFP	2	2	-0.200817
13.9181	GtACR1-EYFP	2	2	-0.19978
14.0351	GtACR1-EYFP	2	2	-0.197582
14.152	GtACR1-EYFP	2	2	-0.196847
14.269	GtACR1-EYFP	2	2	-0.196086
14.386	GtACR1-EYFP	2	2	-0.196827
14.5029	GtACR1-EYFP	2	2	-0.195622
14.6199	GtACR1-EYFP	2	2	-0.195358
14.7368	GtACR1-EYFP	2	2	-0.194571
14.8538	GtACR1-EYFP	2	2	-0.192135
14.9708	GtACR1-EYFP	2	2	-0.190897
15.0877	GtACR1-EYFP	2	2	-0.190749
15.2047	GtACR1-EYFP	2	2	-0.189189
15.3216	GtACR1-EYFP	2	2	-0.18966
15.4386	GtACR1-EYFP	2	2	-0.187739
15.5556	GtACR1-EYFP	2	2	-0.186102
15.6725	GtACR1-EYFP	2	2	-0.185915
15.7895	GtACR1-EYFP	2	2	-0.18536
15.9064	GtACR1-EYFP	2	2	-0.184103
16.0234	GtACR1-EYFP	2	2	-0.184452
16.1404	GtACR1-EYFP	2	2	-0.183098
16.2573	GtACR1-EYFP	2	2	-0.182434
16.3743	GtACR1-EYFP	2	2	-0.183614
16.4912	GtACR1-EYFP	2	2	-0.179824
16.6082	GtACR1-EYFP	2	2	-0.180255
16.7251	GtACR1-EYFP	2	2	-0.181222
16.8421	GtACR1-EYFP	2	2	-0.180365
16.9591	GtACR1-EYFP	2	2	-0.18052
17.076	GtACR1-EYFP	2	2	-0.180591
17.193	GtACR1-EYFP	2	2	-0.177832
17.3099	GtACR1-EYFP	2	2	-0.1772
17.4269	GtACR1-EYFP	2	2	-0.177928
17.5439	GtACR1-EYFP	2	2	-0.176904
17.6608	GtACR1-EYFP	2	2	-0.176884
17.7778	GtACR1-EYFP	2	2	-0.175537
17.8947	GtACR1-EYFP	2	2	-0.175067
18.0117	GtACR1-EYFP	2	2	-0.175421
18.1287	GtACR1-EYFP	2	2	-0.174776
18.2456	GtACR1-EYFP	2	2	-0.173758
18.3626	GtACR1-EYFP	2	2	-0.171734
18.4795	GtACR1-EYFP	2	2	-0.170838
18.5965	GtACR1-EYFP	2	2	-0.171173
18.7135	GtACR1-EYFP	2	2	-0.169517
18.8304	GtACR1-EYFP	2	2	-0.171966
18.9474	GtACR1-EYFP	2	2	-0.166996
19.0643	GtACR1-EYFP	2	2	-0.167718
19.1813	GtACR1-EYFP	2	2	-0.167551
19.2982	GtACR1-EYFP	2	2	-0.166184
19.4152	GtACR1-EYFP	2	2	-0.166938
19.5322	GtACR1-EYFP	2	2	-0.166874
19.6491	GtACR1-EYFP	2	2	-0.165056
19.7661	GtACR1-EYFP	2	2	-0.167222
19.883	GtACR1-EYFP	2	2	-0.165031
0	GtACR1-EYFP	2	3	0
0.116959	GtACR1-EYFP	2	3	-0.0401289
0.233918	GtACR1-EYFP	2	3	-0.0679764
0.350877	GtACR1-EYFP	2	3	-0.099616
0.467836	GtACR1-EYFP	2	3	-0.125866
0.584795	GtACR1-EYFP	2	3	-0.150038
0.701754	GtACR1-EYFP	2	3	-0.170308
0.818713	GtACR1-EYFP	2	3	-0.189968
0.935673	GtACR1-EYFP	2	3	-0.204642
1.05263	GtACR1-EYFP	2	3	-0.225934
1.16959	GtACR1-EYFP	2	3	-0.237256
1.28655	GtACR1-EYFP	2	3	-0.25215
1.40351	GtACR1-EYFP	2	3	-0.257368
1.52047	GtACR1-EYFP	2	3	-0.271645
1.63743	GtACR1-EYFP	2	3	-0.277522
1.75439	GtACR1-EYFP	2	3	-0.285607
1.87135	GtACR1-EYFP	2	3	-0.29219
1.9883	GtACR1-EYFP	2	3	-0.296427
2.10526	GtACR1-EYFP	2	3	-0.303442
2.22222	GtACR1-EYFP	2	3	-0.307495
2.33918	GtACR1-EYFP	2	3	-0.311664
2.45614	GtACR1-EYFP	2	3	-0.315449
2.5731	GtACR1-EYFP	2	3	-0.318062
2.69006	GtACR1-EYFP	2	3	-0.320949
2.80702	GtACR1-EYFP	2	3	-0.322924
2.92398	GtACR1-EYFP	2	3	-0.32483
3.04094	GtACR1-EYFP	2	3	-0.326387
3.15789	GtACR1-EYFP	2	3	-0.32771
3.27485	GtACR1-EYFP	2	3	-0.331907
3.39181	GtACR1-EYFP	2	3	-0.330268
3.50877	GtACR1-EYFP	2	3	-0.330741
3.62573	GtACR1-EYFP	2	3	-0.331324
3.74269	GtACR1-EYFP	2	3	-0.328739
3.85965	GtACR1-EYFP	2	3	-0.329788
3.97661	GtACR1-EYFP	2	3	-0.327409
4.09357	GtACR1-EYFP	2	3	-0.328746
4.21053	GtACR1-EYFP	2	3	-0.328766
4.32749	GtACR1-EYFP	2	3	-0.327409
4.44444	GtACR1-EYFP	2	3	-0.328129
4.5614	GtACR1-EYFP	2	3	-0.327374
4.67836	GtACR1-EYFP	2	3	-0.326003
4.79532	GtACR1-EYFP	2	3	-0.323109
4.91228	GtACR1-EYFP	2	3	-0.321813
5.02924	GtACR1-EYFP	2	3	-0.321141
5.1462	GtACR1-EYFP	2	3	-0.319413
5.26316	GtACR1-EYFP	2	3	-0.317562
5.38012	GtACR1-EYFP	2	3	-0.316732
5.49708	GtACR1-EYFP	2	3	-0.314558
5.61404	GtACR1-EYFP	2	3	-0.312631
5.73099	GtACR1-EYFP	2	3	-0.312617
5.84795	GtACR1-EYFP	2	3	-0.309319
5.96491	GtACR1-EYFP	2	3	-0.311596
6.08187	GtACR1-EYFP	2	3	-0.310169
6.19883	GtACR1-EYFP	2	3	-0.308791
6.31579	GtACR1-EYFP	2	3	-0.306172
6.43275	GtACR1-EYFP	2	3	-0.292395
6.54971	GtACR1-EYFP	2	3	-0.295227
6.66667	GtACR1-EYFP	2	3	-0.291545
6.78363	GtACR1-EYFP	2	3	-0.291531
6.90058	GtACR1-EYFP	2	3	-0.290036
7.01754	GtACR1-EYFP	2	3	-0.291572
7.1345	GtACR1-EYFP	2	3	-0.288987
7.25146	GtACR1-EYFP	2	3	-0.287047
7.36842	GtACR1-EYFP	2	3	-0.284029
7.48538	GtACR1-EYFP	2	3	-0.28608
7.60234	GtACR1-EYFP	2	3	-0.283734
7.7193	GtACR1-EYFP	2	3	-0.279929
7.83626	GtACR1-EYFP	2	3	-0.279044
7.95322	GtACR1-EYFP	2	3	-0.278139
8.07018	GtACR1-EYFP	2	3	-0.278468
8.18713	GtACR1-EYFP	2	3	-0.273881
8.30409	GtACR1-EYFP	2	3	-0.270404
8.42105	GtACR1-EYFP	2	3	-0.269965
8.53801	GtACR1-EYFP	2	3	-0.267448
8.65497	GtACR1-EYFP	2	3	-0.267078
8.77193	GtACR1-EYFP	2	3	-0.266317
8.88889	GtACR1-EYFP	2	3	-0.264973
9.00585	GtACR1-EYFP	2	3	-0.261037
9.12281	GtACR1-EYFP	2	3	-0.257951
9.23977	GtACR1-EYFP	2	3	-0.265412
9.35673	GtACR1-EYFP	2	3	-0.261147
9.47368	GtACR1-EYFP	2	3	-0.258582
9.59064	GtACR1-EYFP	2	3	-0.253343
9.7076	GtACR1-EYFP	2	3	-0.253521
9.82456	GtACR1-EYFP	2	3	-0.249743
9.94152	GtACR1-EYFP	2	3	-0.250895
10.0585	GtACR1-EYFP	2	3	-0.250113
10.1754	GtACR1-EYFP	2	3	-0.249126
10.2924	GtACR1-EYFP	2	3	-0.246808
10.4094	GtACR1-EYFP	2	3	-0.24545
10.5263	GtACR1-EYFP	2	3	-0.242138
10.6433	GtACR1-EYFP	2	3	-0.241082
10.7602	GtACR1-EYFP	2	3	-0.240451
10.8772	GtACR1-EYFP	2	3	-0.237023
10.9942	GtACR1-EYFP	2	3	-0.235658
11.1111	GtACR1-EYFP	2	3	-0.235075
11.2281	GtACR1-EYFP	2	3	-0.233224
11.345	GtACR1-EYFP	2	3	-0.232147
11.462	GtACR1-EYFP	2	3	-0.230851
11.5789	GtACR1-EYFP	2	3	-0.231585
11.6959	GtACR1-EYFP	2	3	-0.232572
11.8129	GtACR1-EYFP	2	3	-0.227484
11.9298	GtACR1-EYFP	2	3	-0.226695
12.0468	GtACR1-EYFP	2	3	-0.231427
12.1637	GtACR1-EYFP	2	3	-0.223109
12.2807	GtACR1-EYFP	2	3	-0.220963
12.3977	GtACR1-EYFP	2	3	-0.22171
12.5146	GtACR1-EYFP	2	3	-0.221429
12.6316	GtACR1-EYFP	2	3	-0.219495
12.7485	GtACR1-EYFP	2	3	-0.217719
12.8655	GtACR1-EYFP	2	3	-0.220174
12.9825	GtACR1-EYFP	2	3	-0.218398
13.0994	GtACR1-EYFP	2	3	-0.217047
13.2164	GtACR1-EYFP	2	3	-0.214544
13.3333	GtACR1-EYFP	2	3	-0.212933
13.4503	GtACR1-EYFP	2	3	-0.211383
13.5673	GtACR1-EYFP	2	3	-0.210396
13.6842	GtACR1-EYFP	2	3	-0.209257
13.8012	GtACR1-EYFP	2	3	-0.208702
13.9181	GtACR1-EYFP	2	3	-0.205746
14.0351	GtACR1-EYFP	2	3	-0.203929
14.152	GtACR1-EYFP	2	3	-0.203319
14.269	GtACR1-EYFP	2	3	-0.202565
14.386	GtACR1-EYFP	2	3	-0.199938
14.5029	GtACR1-EYFP	2	3	-0.200521
14.6199	GtACR1-EYFP	2	3	-0.199547
14.7368	GtACR1-EYFP	2	3	-0.196276
14.8538	GtACR1-EYFP	2	3	-0.195111
14.9708	GtACR1-EYFP	2	3	-0.19618
15.0877	GtACR1-EYFP	2	3	-0.194199
15.2047	GtACR1-EYFP	2	3	-0.193678
15.3216	GtACR1-EYFP	2	3	-0.195378
15.4386	GtACR1-EYFP	2	3	-0.194329
15.5556	GtACR1-EYFP	2	3	-0.192772
15.6725	GtACR1-EYFP	2	3	-0.191668
15.7895	GtACR1-EYFP	2	3	-0.190969
15.9064	GtACR1-EYFP	2	3	-0.191044
16.0234	GtACR1-EYFP	2	3	-0.188905
16.1404	GtACR1-EYFP	2	3	-0.188617
16.2573	GtACR1-EYFP	2	3	-0.18741
16.3743	GtACR1-EYFP	2	3	-0.186292
16.4912	GtACR1-EYFP	2	3	-0.186285
16.6082	GtACR1-EYFP	2	3	-0.184297
16.7251	GtACR1-EYFP	2	3	-0.181252
16.8421	GtACR1-EYFP	2	3	-0.179613
16.9591	GtACR1-EYFP	2	3	-0.177467
17.076	GtACR1-EYFP	2	3	-0.17759
17.193	GtACR1-EYFP	2	3	-0.174628
17.3099	GtACR1-EYFP	2	3	-0.172523
17.4269	GtACR1-EYFP	2	3	-0.173257
17.5439	GtACR1-EYFP	2	3	-0.174121
17.6608	GtACR1-EYFP	2	3	-0.174244
17.7778	GtACR1-EYFP	2	3	-0.173613
17.8947	GtACR1-EYFP	2	3	-0.168683
18.0117	GtACR1-EYFP	2	3	-0.168964
18.1287	GtACR1-EYFP	2	3	-0.168237
18.2456	GtACR1-EYFP	2	3	-0.167304
18.3626	GtACR1-EYFP	2	3	-0.167764
18.4795	GtACR1-EYFP	2	3	-0.165041
18.5965	GtACR1-EYFP	2	3	-0.16583
18.7135	GtACR1-EYFP	2	3	-0.163883
18.8304	GtACR1-EYFP	2	3	-0.164507
18.9474	GtACR1-EYFP	2	3	-0.162545
19.0643	GtACR1-EYFP	2	3	-0.160331
19.1813	GtACR1-EYFP	2	3	-0.161949
19.2982	GtACR1-EYFP	2	3	-0.160303
19.4152	GtACR1-EYFP	2	3	-0.160111
19.5322	GtACR1-EYFP	2	3	-0.157608
19.6491	GtACR1-EYFP	2	3	-0.158465
19.7661	GtACR1-EYFP	2	3	-0.156607
19.883	GtACR1-EYFP	2	3	-0.155174
0	control	1	1	0
0.116959	control	1	1	-0.112177
0.233918	control	1	1	-0.197962
0.350877	control	1	1	-0.264987
0.467836	control	1	1	-0.324122
0.584795	control	1	1	-0.368209
0.701754	control	1	1	-0.413643
0.818713	control	1	1	-0.44688
0.935673	control	1	1	-0.480676
1.05263	control	1	1	-0.507967
1.16959	control	1	1	-0.532291
1.28655	control	1	1	-0.554734
1.40351	control	1	1	-0.571713
1.52047	control	1	1	-0.589546
1.63743	control	1	1	-0.601681
1.75439	control	1	1	-0.616287
1.87135	control	1	1	-0.628415
1.9883	control	1	1	-0.638715
2.10526	control	1	1	-0.648838
2.22222	control	1	1	-0.654591
2.33918	control	1	1	-0.664501
2.45614	control	1	1	-0.671137
2.5731	control	1	1	-0.676514
2.69006	control	1	1	-0.683588
2.80702	control	1	1	-0.686099
2.92398	control	1	1	-0.692906
3.04094	control	1	1	-0.696392
3.15789	control	1	1	-0.700252
3.27485	control	1	1	-0.704218
3.39181	control	1	1	-0.706777
3.50877	control	1	1	-0.711404
3.62573	control	1	1	-0.712834
3.74269	control	1	1	-0.716968
3.85965	control	1	1	-0.719872
3.97661	control	1	1	-0.721178
4.09357	control	1	1	-0.72484
4.21053	control	1	1	-0.726315
4.32749	control	1	1	-0.729201
4.44444	control	1	1	-0.731231
4.5614	control	1	1	-0.732534
4.67836	control	1	1	-0.735551
4.79532	control	1	1	-0.735856
4.91228	control	1	1	-0.738606
5.02924	control	1	1	-0.739526
5.1462	control	1	1	-0.741699
5.26316	control	1	1	-0.743449
5.38012	control	1	1	-0.743774
5.49708	control	1	1	-0.746298
5.61404	control	1	1	-0.747778
5.73099	control	1	1	-0.747954
5.84795	control	1	1	-0.750218
5.96491	control	1	1	-0.749787
6.08187	control	1	1	-0.753054
6.19883	control	1	1	-0.754226
6.31579	control	1	1	-0.754832
6.43275	control	1	1	-0.756688
6.54971	control	1	1	-0.756946
6.66667	control	1	1	-0.758984
6.78363	control	1	1	-0.759705
6.90058	control	1	1	-0.760734
7.01754	control	1	1	-0.762278
7.1345	control	1	1	-0.761447
7.25146	control	1	1	-0.764109
7.36842	control	1	1	-0.764676
7.48538	control	1	1	-0.765208
7.60234	control	1	1	-0.766792
7.7193	control	1	1	-0.766707
7.83626	control	1	1	-0.767738
7.95322	control	1	1	-0.769294
8.07018	control	1	1	-0.76946
8.18713	control	1	1	-0.77082
8.30409	control	1	1	-0.770856
8.42105	control	1	1	-0.77253
8.53801	control	1	1	-0.773339
8.65497	control	1	1	-0.774062
8.77193	control	1	1	-0.775367
8.88889	control	1	1	-0.775594
9.00585	control	1	1	-0.776112
9.12281	control	1	1	-0.777039
9.23977	control	1	1	-0.777059
9.35673	control	1	1	-0.779138
9.47368	control	1	1	-0.779696
9.59064	control	1	1	-0.779656
9.7076	control	1	1	-0.781164
9.82456	control	1	1	-0.780934
9.94152	control	1	1	-0.781738
10.0585	control	1	1	-0.782423
10.1754	control	1	1	-0.783526
10.2924	control	1	1	-0.784495
10.4094	control	1	1	-0.784514
10.5263	control	1	1	-0.785788
10.6433	control	1	1	-0.786634
10.7602	control	1	1	-0.786854
10.8772	control	1	1	-0.787804
10.9942	control	1	1	-0.78817
11.1111	control	1	1	-0.789287
11.2281	control	1	1	-0.790198
11.345	control	1	1	-0.790195
11.462	control	1	1	-0.791399
11.5789	control	1	1	-0.792006
11.6959	control	1	1	-0.791955
11.8129	control	1	1	-0.793309
11.9298	control	1	1	-0.793822
12.0468	control	1	1	-0.794057
12.1637	control	1	1	-0.794707
12.2807	control	1	1	-0.795058
12.3977	control	1	1	-0.79511
12.5146	control	1	1	-0.795827
12.6316	control	1	1	-0.796139
12.7485	control	1	1	-0.79698
12.8655	control	1	1	-0.797492
12.9825	control	1	1	-0.797562
13.0994	control	1	1	-0.797946
13.2164	control	1	1	-0.798545
13.3333	control	1	1	-0.799243
13.4503	control	1	1	-0.800105
13.5673	control	1	1	-0.804458
13.6842	control	1	1	-0.803731
13.8012	control	1	1	-0.804374
13.9181	control	1	1	-0.804412
14.0351	control	1	1	-0.804509
14.152	control	1	1	-0.805037
14.269	control	1	1	-0.804552
14.386	control	1	1	-0.805277
14.5029	control	1	1	-0.805923
14.6199	control	1	1	-0.806094
14.7368	control	1	1	-0.806761
14.8538	control	1	1	-0.807011
14.9708	control	1	1	-0.807277
15.0877	control	1	1	-0.807763
15.2047	control	1	1	-0.807952
15.3216	control	1	1	-0.808199
15.4386	control	1	1	-0.808641
15.5556	control	1	1	-0.808741
15.6725	control	1	1	-0.809144
15.7895	control	1	1	-0.809619
15.9064	control	1	1	-0.80942
16.0234	control	1	1	-0.809509
16.1404	control	1	1	-0.810794
16.2573	control	1	1	-0.81052
16.3743	control	1	1	-0.811264
16.4912	control	1	1	-0.811705
16.6082	control	1	1	-0.812067
16.7251	control	1	1	-0.812556
16.8421	control	1	1	-0.812803
16.9591	control	1	1	-0.813028
17.076	control	1	1	-0.813437
17.193	control	1	1	-0.813341
17.3099	control	1	1	-0.814521
17.4269	control	1	1	-0.814739
17.5439	control	1	1	-0.815014
17.6608	control	1	1	-0.815513
17.7778	control	1	1	-0.815236
17.8947	control	1	1	-0.816086
18.0117	control	1	1	-0.8167
18.1287	control	1	1	-0.817095
18.2456	control	1	1	-0.816694
18.3626	control	1	1	-0.817293
18.4795	control	1	1	-0.819204
18.5965	control	1	1	-0.819201
18.7135	control	1	1	-0.820013
18.8304	control	1	1	-0.819518
18.9474	control	1	1	-0.819231
19.0643	control	1	1	-0.819545
19.1813	control	1	1	-0.819316
19.2982	control	1	1	-0.820084
19.4152	control	1	1	-0.821455
19.5322	control	1	1	-0.821143
19.6491	control	1	1	-0.821232
19.7661	control	1	1	-0.821076
19.883	control	1	1	-0.821648
0	control	1	2	0
0.116959	control	1	2	-0.110386
0.233918	control	1	2	-0.194934
0.350877	control	1	2	-0.262371
0.467836	control	1	2	-0.323402
0.584795	control	1	2	-0.364828
0.701754	control	1	2	-0.411802
0.818713	control	1	2	-0.445822
0.935673	control	1	2	-0.478098
1.05263	control	1	2	-0.508306
1.16959	control	1	2	-0.529466
1.28655	control	1	2	-0.550842
1.40351	control	1	2	-0.570997
1.52047	control	1	2	-0.585892
1.63743	control	1	2	-0.602884
1.75439	control	1	2	-0.614294
1.87135	control	1	2	-0.626622
1.9883	control	1	2	-0.636705
2.10526	control	1	2	-0.646901
2.22222	control	1	2	-0.654824
2.33918	control	1	2	-0.663007
2.45614	control	1	2	-0.669323
2.5731	control	1	2	-0.677266
2.69006	control	1	2	-0.681724
2.80702	control	1	2	-0.687843
2.92398	control	1	2	-0.691619
3.04094	control	1	2	-0.69628
3.15789	control	1	2	-0.700635
3.27485	control	1	2	-0.703223
3.39181	control	1	2	-0.707408
3.50877	control	1	2	-0.710599
3.62573	control	1	2	-0.713361
3.74269	control	1	2	-0.71646
3.85965	control	1	2	-0.718264
3.97661	control	1	2	-0.721498
4.09357	control	1	2	-0.724461
4.21053	control	1	2	-0.725394
4.32749	control	1	2	-0.728401
4.44444	control	1	2	-0.730315
4.5614	control	1	2	-0.731829
4.67836	control	1	2	-0.733471
4.79532	control	1	2	-0.735339
4.91228	control	1	2	-0.736711
5.02924	control	1	2	-0.739281
5.1462	control	1	2	-0.740523
5.26316	control	1	2	-0.741296
5.38012	control	1	2	-0.74295
5.49708	control	1	2	-0.74438
5.61404	control	1	2	-0.745987
5.73099	control	1	2	-0.747248
5.84795	control	1	2	-0.749019
5.96491	control	1	2	-0.750057
6.08187	control	1	2	-0.750641
6.19883	control	1	2	-0.752883
6.31579	control	1	2	-0.753826
6.43275	control	1	2	-0.755431
6.54971	control	1	2	-0.756237
6.66667	control	1	2	-0.75705
6.78363	control	1	2	-0.757686
6.90058	control	1	2	-0.75858
7.01754	control	1	2	-0.759908
7.1345	control	1	2	-0.76082
7.25146	control	1	2	-0.761528
7.36842	control	1	2	-0.763423
7.48538	control	1	2	-0.762921
7.60234	control	1	2	-0.764145
7.7193	control	1	2	-0.765187
7.83626	control	1	2	-0.766434
7.95322	control	1	2	-0.767241
8.07018	control	1	2	-0.768548
8.18713	control	1	2	-0.769301
8.30409	control	1	2	-0.770099
8.42105	control	1	2	-0.770398
8.53801	control	1	2	-0.771643
8.65497	control	1	2	-0.772776
8.77193	control	1	2	-0.773194
8.88889	control	1	2	-0.774357
9.00585	control	1	2	-0.774666
9.12281	control	1	2	-0.775355
9.23977	control	1	2	-0.775109
9.35673	control	1	2	-0.776593
9.47368	control	1	2	-0.777094
9.59064	control	1	2	-0.777764
9.7076	control	1	2	-0.777878
9.82456	control	1	2	-0.779096
9.94152	control	1	2	-0.77985
10.0585	control	1	2	-0.780482
10.1754	control	1	2	-0.780945
10.2924	control	1	2	-0.781086
10.4094	control	1	2	-0.782806
10.5263	control	1	2	-0.783461
10.6433	control	1	2	-0.784168
10.7602	control	1	2	-0.784346
10.8772	control	1	2	-0.784787
10.9942	control	1	2	-0.784643
11.1111	control	1	2	-0.785365
11.2281	control	1	2	-0.786236
11.345	control	1	2	-0.786828
11.462	control	1	2	-0.787083
11.5789	control	1	2	-0.787959
11.6959	control	1	2	-0.788037
11.8129	control	1	2	-0.789363
11.9298	control	1	2	-0.790406
12.0468	control	1	2	-0.790497
12.1637	control	1	2	-0.791104
12.2807	control	1	2	-0.791564
12.3977	control	1	2	-0.792019
12.5146	control	1	2	-0.791965
12.6316	control	1	2	-0.791986
12.7485	control	1	2	-0.793871
12.8655	control	1	2	-0.792916
12.9825	control	1	2	-0.794409
13.0994	control	1	2	-0.794685
13.2164	control	1	2	-0.795342
13.3333	control	1	2	-0.795671
13.4503	control	1	2	-0.795752
13.5673	control	1	2	-0.796317
13.6842	control	1	2	-0.796948
13.8012	control	1	2	-0.796803
13.9181	control	1	2	-0.79763
14.0351	control	1	2	-0.797857
14.152	control	1	2	-0.798435
14.269	control	1	2	-0.798806
14.386	control	1	2	-0.799279
14.5029	control	1	2	-0.799393
14.6199	control	1	2	-0.800066
14.7368	control	1	2	-0.800492
14.8538	control	1	2	-0.800886
14.9708	control	1	2	-0.801244
15.0877	control	1	2	-0.801667
15.2047	control	1	2	-0.8022
15.3216	control	1	2	-0.802326
15.4386	control	1	2	-0.802759
15.5556	control	1	2	-0.803518
15.6725	control	1	2	-0.803563
15.7895	control	1	2	-0.803672
15.9064	control	1	2	-0.804485
16.0234	control	1	2	-0.80528
16.1404	control	1	2	-0.805113
16.2573	control	1	2	-0.805111
16.3743	control	1	2	-0.805781
16.4912	control	1	2	-0.806198
16.6082	control	1	2	-0.807417
16.7251	control	1	2	-0.807226
16.8421	control	1	2	-0.807933
16.9591	control	1	2	-0.807947
17.076	control	1	2	-0.808629
17.193	control	1	2	-0.808274
17.3099	control	1	2	-0.809755
17.4269	control	1	2	-0.810561
17.5439	control	1	2	-0.812366
17.6608	control	1	2	-0.812744
17.7778	control	1	2	-0.811974
17.8947	control	1	2	-0.812761
18.0117	control	1	2	-0.812568
18.1287	control	1	2	-0.812727
18.2456	control	1	2	-0.81256
18.3626	control	1	2	-0.812884
18.4795	control	1	2	-0.813028
18.5965	control	1	2	-0.813449
18.7135	control	1	2	-0.813884
18.8304	control	1	2	-0.814515
18.9474	control	1	2	-0.814918
19.0643	control	1	2	-0.815226
19.1813	control	1	2	-0.814837
19.2982	control	1	2	-0.815762
19.4152	control	1	2	-0.815948
19.5322	control	1	2	-0.81647
19.6491	control	1	2	-0.81674
19.7661	control	1	2	-0.816452
19.883	control	1	2	-0.816901
0	control	1	3	0
0.116959	control	1	3	-0.133749
0.233918	control	1	3	-0.216428
0.350877	control	1	3	-0.276441
0.467836	control	1	3	-0.337383
0.584795	control	1	3	-0.372782
0.701754	control	1	3	-0.419064
0.818713	control	1	3	-0.454626
0.935673	control	1	3	-0.481545
1.05263	control	1	3	-0.507201
1.16959	control	1	3	-0.532398
1.28655	control	1	3	-0.551053
1.40351	control	1	3	-0.569505
1.52047	control	1	3	-0.585779
1.63743	control	1	3	-0.597745
1.75439	control	1	3	-0.611357
1.87135	control	1	3	-0.622244
1.9883	control	1	3	-0.631117
2.10526	control	1	3	-0.642123
2.22222	control	1	3	-0.650477
2.33918	control	1	3	-0.65643
2.45614	control	1	3	-0.664377
2.5731	control	1	3	-0.669438
2.69006	control	1	3	-0.673725
2.80702	control	1	3	-0.679449
2.92398	control	1	3	-0.683827
3.04094	control	1	3	-0.687339
3.15789	control	1	3	-0.692158
3.27485	control	1	3	-0.694982
3.39181	control	1	3	-0.698335
3.50877	control	1	3	-0.702151
3.62573	control	1	3	-0.703283
3.74269	control	1	3	-0.707841
3.85965	control	1	3	-0.710694
3.97661	control	1	3	-0.712176
4.09357	control	1	3	-0.714047
4.21053	control	1	3	-0.716736
4.32749	control	1	3	-0.718253
4.44444	control	1	3	-0.721218
4.5614	control	1	3	-0.723547
4.67836	control	1	3	-0.723278
4.79532	control	1	3	-0.727005
4.91228	control	1	3	-0.728755
5.02924	control	1	3	-0.728853
5.1462	control	1	3	-0.731639
5.26316	control	1	3	-0.732885
5.38012	control	1	3	-0.734229
5.49708	control	1	3	-0.735859
5.61404	control	1	3	-0.736251
5.73099	control	1	3	-0.737851
5.84795	control	1	3	-0.738861
5.96491	control	1	3	-0.740421
6.08187	control	1	3	-0.742296
6.19883	control	1	3	-0.743233
6.31579	control	1	3	-0.744363
6.43275	control	1	3	-0.74561
6.54971	control	1	3	-0.74677
6.66667	control	1	3	-0.747658
6.78363	control	1	3	-0.748156
6.90058	control	1	3	-0.74966
7.01754	control	1	3	-0.750831
7.1345	control	1	3	-0.750719
7.25146	control	1	3	-0.751295
7.36842	control	1	3	-0.75272
7.48538	control	1	3	-0.753607
7.60234	control	1	3	-0.754298
7.7193	control	1	3	-0.7561
7.83626	control	1	3	-0.756688
7.95322	control	1	3	-0.75692
8.07018	control	1	3	-0.758032
8.18713	control	1	3	-0.758842
8.30409	control	1	3	-0.759756
8.42105	control	1	3	-0.760217
8.53801	control	1	3	-0.760982
8.65497	control	1	3	-0.7617
8.77193	control	1	3	-0.763057
8.88889	control	1	3	-0.763045
9.00585	control	1	3	-0.764714
9.12281	control	1	3	-0.765382
9.23977	control	1	3	-0.766064
9.35673	control	1	3	-0.766732
9.47368	control	1	3	-0.767491
9.59064	control	1	3	-0.767943
9.7076	control	1	3	-0.768901
9.82456	control	1	3	-0.768624
9.94152	control	1	3	-0.768638
10.0585	control	1	3	-0.769831
10.1754	control	1	3	-0.770585
10.2924	control	1	3	-0.771237
10.4094	control	1	3	-0.771733
10.5263	control	1	3	-0.772652
10.6433	control	1	3	-0.772575
10.7602	control	1	3	-0.773383
10.8772	control	1	3	-0.774309
10.9942	control	1	3	-0.775024
11.1111	control	1	3	-0.775113
11.2281	control	1	3	-0.775869
11.345	control	1	3	-0.77589
11.462	control	1	3	-0.776538
11.5789	control	1	3	-0.776931
11.6959	control	1	3	-0.777786
11.8129	control	1	3	-0.778046
11.9298	control	1	3	-0.778601
12.0468	control	1	3	-0.778772
12.1637	control	1	3	-0.779021
12.2807	control	1	3	-0.779873
12.3977	control	1	3	-0.780283
12.5146	control	1	3	-0.78072
12.6316	control	1	3	-0.781203
12.7485	control	1	3	-0.781877
12.8655	control	1	3	-0.78224
12.9825	control	1	3	-0.782672
13.0994	control	1	3	-0.782602
13.2164	control	1	3	-0.783599
13.3333	control	1	3	-0.78405
13.4503	control	1	3	-0.784252
13.5673	control	1	3	-0.784772
13.6842	control	1	3	-0.785214
13.8012	control	1	3	-0.78546
13.9181	control	1	3	-0.786758
14.0351	control	1	3	-0.787728
14.152	control	1	3	-0.787741
14.269	control	1	3	-0.788284
14.386	control	1	3	-0.788352
14.5029	control	1	3	-0.789208
14.6199	control	1	3	-0.789441
14.7368	control	1	3	-0.789963
14.8538	control	1	3	-0.79006
14.9708	control	1	3	-0.789941
15.0877	control	1	3	-0.790456
15.2047	control	1	3	-0.790958
15.3216	control	1	3	-0.790868
15.4386	control	1	3	-0.791103
15.5556	control	1	3	-0.791624
15.6725	control	1	3	-0.792524
15.7895	control	1	3	-0.7928
15.9064	control	1	3	-0.793542
16.0234	control	1	3	-0.79387
16.1404	control	1	3	-0.794065
16.2573	control	1	3	-0.794067
16.3743	control	1	3	-0.794103
16.4912	control	1	3	-0.794661
16.6082	control	1	3	-0.794962
16.7251	control	1	3	-0.795118
16.8421	control	1	3	-0.795825
16.9591	control	1	3	-0.796171
17.076	control	1	3	-0.797076
17.193	control	1	3	-0.79678
17.3099	control	1	3	-0.797637
17.4269	control	1	3	-0.798223
17.5439	control	1	3	-0.798256
17.6608	control	1	3	-0.798966
17.7778	control	1	3	-0.799537
17.8947	control	1	3	-0.8009
18.0117	control	1	3	-0.800676
18.1287	control	1	3	-0.800098
18.2456	control	1	3	-0.800188
18.3626	control	1	3	-0.800166
18.4795	control	1	3	-0.800578
18.5965	control	1	3	-0.801174
18.7135	control	1	3	-0.802212
18.8304	control	1	3	-0.802641
18.9474	control	1	3	-0.802525
19.0643	control	1	3	-0.802157
19.1813	control	1	3	-0.80262
19.2982	control	1	3	-0.804042
19.4152	control	1	3	-0.803834
19.5322	control	1	3	-0.803779
19.6491	control	1	3	-0.804123
19.7661	control	1	3	-0.804434
19.883	control	1	3	-0.804472
0	control	2	1	0
0.116959	control	2	1	-0.126449
0.233918	control	2	1	-0.215429
0.350877	control	2	1	-0.267487
0.467836	control	2	1	-0.328165
0.584795	control	2	1	-0.372255
0.701754	control	2	1	-0.407427
0.818713	control	2	1	-0.442787
0.935673	control	2	1	-0.476377
1.05263	control	2	1	-0.498813
1.16959	control	2	1	-0.521995
1.28655	control	2	1	-0.54332
1.40351	control	2	1	-0.561477
1.52047	control	2	1	-0.575096
1.63743	control	2	1	-0.591864
1.75439	control	2	1	-0.604783
1.87135	control	2	1	-0.61191
1.9883	control	2	1	-0.623475
2.10526	control	2	1	-0.633454
2.22222	control	2	1	-0.63936
2.33918	control	2	1	-0.647387
2.45614	control	2	1	-0.655168
2.5731	control	2	1	-0.661176
2.69006	control	2	1	-0.664677
2.80702	control	2	1	-0.672704
2.92398	control	2	1	-0.678411
3.04094	control	2	1	-0.679905
3.15789	control	2	1	-0.685522
3.27485	control	2	1	-0.689297
3.39181	control	2	1	-0.6925
3.50877	control	2	1	-0.694937
3.62573	control	2	1	-0.698525
3.74269	control	2	1	-0.702021
3.85965	control	2	1	-0.702011
3.97661	control	2	1	-0.706161
4.09357	control	2	1	-0.709104
4.21053	control	2	1	-0.710405
4.32749	control	2	1	-0.712641
4.44444	control	2	1	-0.715921
4.5614	control	2	1	-0.71801
4.67836	control	2	1	-0.718338
4.79532	control	2	1	-0.721297
4.91228	control	2	1	-0.723421
5.02924	control	2	1	-0.725006
5.1462	control	2	1	-0.725184
5.26316	control	2	1	-0.727381
5.38012	control	2	1	-0.729614
5.49708	control	2	1	-0.729354
5.61404	control	2	1	-0.731048
5.73099	control	2	1	-0.734952
5.84795	control	2	1	-0.735929
5.96491	control	2	1	-0.734956
6.08187	control	2	1	-0.737896
6.19883	control	2	1	-0.739781
6.31579	control	2	1	-0.740169
6.43275	control	2	1	-0.740268
6.54971	control	2	1	-0.742226
6.66667	control	2	1	-0.743932
6.78363	control	2	1	-0.744207
6.90058	control	2	1	-0.745391
7.01754	control	2	1	-0.74657
7.1345	control	2	1	-0.748133
7.25146	control	2	1	-0.747249
7.36842	control	2	1	-0.749403
7.48538	control	2	1	-0.750823
7.60234	control	2	1	-0.752039
7.7193	control	2	1	-0.750872
7.83626	control	2	1	-0.752322
7.95322	control	2	1	-0.753989
8.07018	control	2	1	-0.755234
8.18713	control	2	1	-0.7549
8.30409	control	2	1	-0.75635
8.42105	control	2	1	-0.757848
8.53801	control	2	1	-0.758298
8.65497	control	2	1	-0.758356
8.77193	control	2	1	-0.758977
8.88889	control	2	1	-0.759762
9.00585	control	2	1	-0.75999
9.12281	control	2	1	-0.760638
9.23977	control	2	1	-0.761526
9.35673	control	2	1	-0.763037
9.47368	control	2	1	-0.763197
9.59064	control	2	1	-0.762933
9.7076	control	2	1	-0.764647
9.82456	control	2	1	-0.765596
9.94152	control	2	1	-0.764516
10.0585	control	2	1	-0.765288
10.1754	control	2	1	-0.76691
10.2924	control	2	1	-0.76774
10.4094	control	2	1	-0.766776
10.5263	control	2	1	-0.767851
10.6433	control	2	1	-0.770682
10.7602	control	2	1	-0.770951
10.8772	control	2	1	-0.76966
10.9942	control	2	1	-0.770598
11.1111	control	2	1	-0.771911
11.2281	control	2	1	-0.77223
11.345	control	2	1	-0.772273
11.462	control	2	1	-0.773273
11.5789	control	2	1	-0.774009
11.6959	control	2	1	-0.773706
11.8129	control	2	1	-0.773546
11.9298	control	2	1	-0.774534
12.0468	control	2	1	-0.775625
12.1637	control	2	1	-0.77493
12.2807	control	2	1	-0.775066
12.3977	control	2	1	-0.776771
12.5146	control	2	1	-0.776992
12.6316	control	2	1	-0.776129
12.7485	control	2	1	-0.777321
12.8655	control	2	1	-0.777927
12.9825	control	2	1	-0.778847
13.0994	control	2	1	-0.777669
13.2164	control	2	1	-0.778604
13.3333	control	2	1	-0.780585
13.4503	control	2	1	-0.780845
13.5673	control	2	1	-0.780128
13.6842	control	2	1	-0.780901
13.8012	control	2	1	-0.781531
13.9181	control	2	1	-0.782489
14.0351	control	2	1	-0.781573
14.152	control	2	1	-0.783058
14.269	control	2	1	-0.783701
14.386	control	2	1	-0.784851
14.5029	control	2	1	-0.783072
14.6199	control	2	1	-0.784225
14.7368	control	2	1	-0.785002
14.8538	control	2	1	-0.785165
14.9708	control	2	1	-0.784794
15.0877	control	2	1	-0.785886
15.2047	control	2	1	-0.786522
15.3216	control	2	1	-0.786079
15.4386	control	2	1	-0.786648
15.5556	control	2	1	-0.787046
15.6725	control	2	1	-0.788693
15.7895	control	2	1	-0.788398
15.9064	control	2	1	-0.788564
16.0234	control	2	1	-0.788907
16.1404	control	2	1	-0.790118
16.2573	control	2	1	-0.789144
16.3743	control	2	1	-0.789821
16.4912	control	2	1	-0.7899
16.6082	control	2	1	-0.790395
16.7251	control	2	1	-0.791835
16.8421	control	2	1	-0.790992
16.9591	control	2	1	-0.79171
17.076	control	2	1	-0.792031
17.193	control	2	1	-0.792567
17.3099	control	2	1	-0.792079
17.4269	control	2	1	-0.793074
17.5439	control	2	1	-0.793294
17.6608	control	2	1	-0.793803
17.7778	control	2	1	-0.79318
17.8947	control	2	1	-0.794134
18.0117	control	2	1	-0.794614
18.1287	control	2	1	-0.794713
18.2456	control	2	1	-0.794313
18.3626	control	2	1	-0.795304
18.4795	control	2	1	-0.795443
18.5965	control	2	1	-0.795391
18.7135	control	2	1	-0.79588
18.8304	control	2	1	-0.796201
18.9474	control	2	1	-0.796874
19.0643	control	2	1	-0.796557
19.1813	control	2	1	-0.797178
19.2982	control	2	1	-0.797459
19.4152	control	2	1	-0.797748
19.5322	control	2	1	-0.797235
19.6491	control	2	1	-0.798042
19.7661	control	2	1	-0.798357
19.883	control	2	1	-0.798294
0	control	2	2	0
0.116959	control	2	2	-0.0533919
0.233918	control	2	2	-0.142889
0.350877	control	2	2	-0.16749
0.467836	control	2	2	-0.239468
0.584795	control	2	2	-0.249457
0.701754	control	2	2	-0.30954
0.818713	control	2	2	-0.312771
0.935673	control	2	2	-0.359659
1.05263	control	2	2	-0.377495
1.16959	control	2	2	-0.39753
1.28655	control	2	2	-0.44744
1.40351	control	2	2	-0.428675
1.52047	control	2	2	-0.458043
1.63743	control	2	2	-0.466422
1.75439	control	2	2	-0.473253
1.87135	control	2	2	-0.498876
1.9883	control	2	2	-0.484798
2.10526	control	2	2	-0.511731
2.22222	control	2	2	-0.496242
2.33918	control	2	2	-0.51361
2.45614	control	2	2	-0.513625
2.5731	control	2	2	-0.515644
2.69006	control	2	2	-0.531819
2.80702	control	2	2	-0.519867
2.92398	control	2	2	-0.545128
3.04094	control	2	2	-0.52576
3.15789	control	2	2	-0.541813
3.27485	control	2	2	-0.532909
3.39181	control	2	2	-0.535853
3.50877	control	2	2	-0.542357
3.62573	control	2	2	-0.534678
3.74269	control	2	2	-0.556355
3.85965	control	2	2	-0.533812
3.97661	control	2	2	-0.555603
4.09357	control	2	2	-0.538557
4.21053	control	2	2	-0.548661
4.32749	control	2	2	-0.54592
4.44444	control	2	2	-0.543621
4.5614	control	2	2	-0.553967
4.67836	control	2	2	-0.541386
4.79532	control	2	2	-0.564487
4.91228	control	2	2	-0.542567
5.02924	control	2	2	-0.558561
5.1462	control	2	2	-0.545805
5.26316	control	2	2	-0.552144
5.38012	control	2	2	-0.554879
5.49708	control	2	2	-0.547786
5.61404	control	2	2	-0.565467
5.73099	control	2	2	-0.546877
5.84795	control	2	2	-0.567234
5.96491	control	2	2	-0.546993
6.08187	control	2	2	-0.5611
6.19883	control	2	2	-0.553057
6.31579	control	2	2	-0.552789
6.43275	control	2	2	-0.559873
6.54971	control	2	2	-0.550713
6.66667	control	2	2	-0.570974
6.78363	control	2	2	-0.551065
6.90058	control	2	2	-0.569133
7.01754	control	2	2	-0.553082
7.1345	control	2	2	-0.561413
7.25146	control	2	2	-0.561574
7.36842	control	2	2	-0.555065
7.48538	control	2	2	-0.56936
7.60234	control	2	2	-0.555231
7.7193	control	2	2	-0.574888
7.83626	control	2	2	-0.553718
7.95322	control	2	2	-0.564384
8.07018	control	2	2	-0.558518
8.18713	control	2	2	-0.55838
8.30409	control	2	2	-0.566688
8.42105	control	2	2	-0.555757
8.53801	control	2	2	-0.577709
8.65497	control	2	2	-0.554804
8.77193	control	2	2	-0.571011
8.88889	control	2	2	-0.55739
9.00585	control	2	2	-0.562734
9.12281	control	2	2	-0.564694
9.23977	control	2	2	-0.556763
9.35673	control	2	2	-0.572721
9.47368	control	2	2	-0.556929
9.59064	control	2	2	-0.577242
9.7076	control	2	2	-0.557926
9.82456	control	2	2	-0.569389
9.94152	control	2	2	-0.561503
10.0585	control	2	2	-0.561107
10.1754	control	2	2	-0.568051
10.2924	control	2	2	-0.558
10.4094	control	2	2	-0.576469
10.5263	control	2	2	-0.555307
10.6433	control	2	2	-0.57228
10.7602	control	2	2	-0.556446
10.8772	control	2	2	-0.564053
10.9942	control	2	2	-0.563789
11.1111	control	2	2	-0.5618
11.2281	control	2	2	-0.570441
11.345	control	2	2	-0.556338
11.462	control	2	2	-0.580568
11.5789	control	2	2	-0.558414
11.6959	control	2	2	-0.57241
11.8129	control	2	2	-0.560238
11.9298	control	2	2	-0.56618
12.0468	control	2	2	-0.567633
12.1637	control	2	2	-0.560008
12.2807	control	2	2	-0.576521
12.3977	control	2	2	-0.559961
12.5146	control	2	2	-0.579949
12.6316	control	2	2	-0.55977
12.7485	control	2	2	-0.571783
12.8655	control	2	2	-0.561017
12.9825	control	2	2	-0.564344
13.0994	control	2	2	-0.566666
13.2164	control	2	2	-0.560994
13.3333	control	2	2	-0.578216
13.4503	control	2	2	-0.559244
13.5673	control	2	2	-0.577284
13.6842	control	2	2	-0.559979
13.8012	control	2	2	-0.571609
13.9181	control	2	2	-0.563567
14.0351	control	2	2	-0.564382
14.152	control	2	2	-0.570159
14.269	control	2	2	-0.562219
14.386	control	2	2	-0.57902
14.5029	control	2	2	-0.559687
14.6199	control	2	2	-0.578958
14.7368	control	2	2	-0.561321
14.8538	control	2	2	-0.572418
14.9708	control	2	2	-0.565515
15.0877	control	2	2	-0.564127
15.2047	control	2	2	-0.571595
15.3216	control	2	2	-0.564838
15.4386	control	2	2	-0.584263
15.5556	control	2	2	-0.562002
15.6725	control	2	2	-0.578737
15.7895	control	2	2	-0.562147
15.9064	control	2	2	-0.571685
16.0234	control	2	2	-0.566639
16.1404	control	2	2	-0.566007
16.2573	control	2	2	-0.574623
16.3743	control	2	2	-0.563402
16.4912	control	2	2	-0.583296
16.6082	control	2	2	-0.563095
16.7251	control	2	2	-0.578931
16.8421	control	2	2	-0.563663
16.9591	control	2	2	-0.572428
17.076	control	2	2	-0.569878
17.193	control	2	2	-0.566812
17.3099	control	2	2	-0.577178
17.4269	control	2	2	-0.564409
17.5439	control	2	2	-0.585476
17.6608	control	2	2	-0.56465
17.7778	control	2	2	-0.579582
17.8947	control	2	2	-0.56585
18.0117	control	2	2	-0.570612
18.1287	control	2	2	-0.571959
18.2456	control	2	2	-0.565755
18.3626	control	2	2	-0.582273
18.4795	control	2	2	-0.565384
18.5965	control	2	2	-0.585455
18.7135	control	2	2	-0.566559
18.8304	control	2	2	-0.579054
18.9474	control	2	2	-0.570807
19.0643	control	2	2	-0.571675
19.1813	control	2	2	-0.576528
19.2982	control	2	2	-0.566945
19.4152	control	2	2	-0.585166
19.5322	control	2	2	-0.566188
19.6491	control	2	2	-0.584103
19.7661	control	2	2	-0.566366
19.883	control	2	2	-0.575666
