# Supplementary material for: Optogenetic manipulation of neuronal and cardiomyocyte functions in zebrafish using microbial rhodopsins and adenylyl cyclases
Source: eLife. 2023 Aug 17;12:e83975. doi: 10.7554/eLife.83975 (PMC10435232; doi:10.7554/eLife.83975)
Supplement: Figure 6—source data 1. [file elife-83975-fig6-data1.xlsx]

## Sheet: B
time	position
-1.0047	-0.00799
-0.98962	-0.00799
-0.97454	-0.00799
-0.959459	-0.00799
-0.944379	-0.00799
-0.929299	-0.00799
-0.914218	-0.00799
-0.899138	-0.00799
-0.884058	-0.00799
-0.868977	-0.00799
-0.853897	-0.00799
-0.838817	-0.00799
-0.823737	-0.00799
-0.808656	-0.00799
-0.793576	-0.00799
-0.778496	-0.00799
-0.763415	-0.00799
-0.748335	-0.00799
-0.733255	-0.00799
-0.718174	-0.00799
-0.703094	-0.00799
-0.688014	-0.00799
-0.672934	-0.00799
-0.657853	-0.00799
-0.642773	-0.00799
-0.627693	-0.00799
-0.612612	-0.00799
-0.597532	-0.00799
-0.582452	-0.00799
-0.567372	-0.00799
-0.552291	-0.00799
-0.537211	-0.00799
-0.522131	-0.00799
-0.50705	-0.00799
-0.49197	-0.00799
-0.47689	-0.00799
-0.461809	-0.00799
-0.446729	-0.00799
-0.431649	-0.00799
-0.416569	-0.00799
-0.401488	-0.00799
-0.386408	-0.00799
-0.371328	-0.00799
-0.356247	-0.00799
-0.341167	-0.00799
-0.326087	-0.00799
-0.311006	-0.00799
-0.295926	-0.00799
-0.280846	-0.00799
-0.265766	-0.00799
-0.250685	-0.00799
-0.235605	-0.00799
-0.220525	-0.00799
-0.205444	-0.00799
-0.190364	-0.00799
-0.175284	-0.00799
-0.160203	-0.00799
-0.145123	-0.00799
-0.130043	-0.00799
-0.114963	-0.00799
-0.099882	-0.00799
-0.084802	-0.00799
-0.069722	-0.00799
-0.054641	-0.00799
-0.039561	-0.00799
-0.024481	-0.00799
-0.0094	-0.00799
0.00568	-0.00799
0.02076	-0.00799
0.03584	-0.00799
0.050921	-0.00799
0.066001	-0.00799
0.081081	-0.00799
0.096162	-0.00799
0.111242	-0.00799
0.126322	-0.00799
0.141403	-0.00799
0.156483	-0.00799
0.171563	-0.00799
0.186643	-0.00799
0.201724	-0.00799
0.216804	-0.00799
0.231884	-0.00799
0.246965	-0.00799
0.262045	-0.00799
0.277125	-0.00799
0.292206	-0.00799
0.307286	-0.00799
0.322366	-0.00799
0.337446	-0.00799
0.352527	-0.00799
0.367607	-0.00799
0.382687	-0.00799
0.397768	-0.00799
0.412848	-0.00799
0.427928	-0.00799
0.443009	-0.00799
0.458089	-0.00799
0.473169	-0.00799
0.488249	-0.00799
0.50333	-0.00799
0.51841	-0.00799
0.53349	-0.00799
0.548571	-0.00799
0.563651	-0.00799
0.578731	-0.00799
0.593812	-0.00799
0.608892	-0.00799
0.623972	-0.00799
0.639053	-0.00799
0.654133	-0.00799
0.669213	-0.00799
0.684293	-0.00799
0.699374	-0.00799
0.714454	-0.00799
0.729534	-0.00799
0.744615	-0.00799
0.759695	-0.00799
0.774775	-0.00799
0.789855	-0.00799
0.804936	-0.00799
0.820016	-0.00799
0.835096	-0.00799
0.850177	-0.00799
0.865257	-0.00799
0.880337	-0.00799
0.895418	-0.00799
0.910498	-0.00799
0.925578	-0.00799
0.940659	-0.00799
0.955739	-0.00799
0.970819	-0.00799
0.985899	-0.00799
1.00098	-0.00799
1.01606	-0.00799
1.03114	-0.00799
1.04622	-0.00799
1.0613	-0.00799
1.07638	-0.00799
1.09146	-0.00799
1.10654	-0.00799
1.12162	-0.00799
1.1367	-0.00799
1.15178	-0.00799
1.16686	-0.00799
1.18194	-0.00799
1.19702	-0.00799
1.2121	-0.00799
1.22718	-0.00799
1.24226	-0.00799
1.25734	-0.00799
1.27242	-0.00799
1.2875	-0.00799
1.30259	-0.00799
1.31767	-0.00799
1.33275	-0.00799
1.34783	-0.00799
1.36291	-0.00799
1.37799	-0.00799
1.39307	-0.00799
1.40815	-0.00799
1.42323	-0.00333
1.43831	0.00132
1.45339	1.36
1.46847	-0.713
1.48355	-0.824
1.49863	1.26
1.51371	-0.509
1.52879	0.0354
1.54387	-0.819
1.55895	0.178
1.57403	-0.771
1.58911	0.249
1.60419	0.407
1.61927	-0.681
1.63435	0.549
1.64943	-0.657
1.66451	0.592
1.67959	-0.633
1.69467	0.59
1.70975	-0.624
1.72483	0.624
1.73991	-0.475
1.755	0.613
1.77008	-0.615
1.78516	0.654
1.80024	-0.676
1.81532	0.572
1.8304	-0.48
1.84548	0.422
1.86056	0.518
1.87564	-0.662
1.89072	0.652
1.9058	-0.58
1.92088	0.581
1.93596	-0.599
1.95104	0.579
1.96612	-0.651
1.9812	0.564
1.99628	-0.612
2.01136	0.599
2.02644	-0.576
2.04152	0.667
2.0566	-0.641
2.07168	0.738
2.08676	-0.541
2.10184	0.658
2.11692	-0.44
2.132	0.61
2.14708	-0.536
2.16216	0.638
2.17724	-0.556
2.19232	0.666
2.2074	1.01
2.22248	0.698
2.23756	0.832
2.25264	0.526
2.26772	0.749
2.28281	-0.697
2.29788	0.498
2.31297	-0.667
2.32805	0.523
2.34313	-0.565
2.35821	0.499
2.37329	-0.576
2.38837	0.493
2.40345	-0.605
2.41853	0.487
2.43361	-0.595
2.44869	0.511
2.46377	-0.659
2.47885	0.545
2.49393	-0.612
2.50901	0.633
2.52409	-0.564
2.53917	0.469
2.55425	-0.0468
2.56933	-0.252
2.58441	0.239
2.59949	-0.0492
2.61457	-0.00101
2.62965	-0.0432
2.64473	-0.0249
2.65981	-0.0202
2.67489	-0.0156
2.68997	-0.0156
2.70505	-0.0156
2.72013	-0.0156
2.73521	-0.0156
2.75029	-0.0156
2.76538	-0.0156
2.78045	-0.0156
2.79554	-0.0156
2.81062	-0.0156
2.8257	-0.0156
2.84078	-0.0156
2.85586	-0.0156
2.87094	-0.0156
2.88602	-0.0156
2.9011	-0.0156
2.91618	-0.0156
2.93126	-0.0156
2.94634	-0.0156
2.96142	-0.0156
2.9765	-0.0156
2.99158	-0.0156
3.00666	-0.0156
3.02174	-0.0156
3.03682	-0.0156
3.0519	-0.0156
3.06698	-0.0156
3.08206	-0.0156
3.09714	-0.0156
3.11222	-0.0156
3.1273	-0.0156
3.14238	-0.0156
3.15746	-0.0156
3.17254	-0.0156
3.18762	-0.0156
3.2027	-0.0156
3.21778	-0.0109
3.23286	-0.0109
3.24794	-0.0112
3.26302	-0.0112
3.27811	-0.0112
3.29318	-0.0112
3.30827	-0.0112
3.32335	-0.0112
3.33843	-0.0112
3.35351	-0.0112
3.36859	-0.0112
3.38367	-0.0112
3.39875	-0.0112
3.41383	-0.0112
3.42891	-0.0112
3.44399	-0.0112
3.45907	-0.0112
3.47415	-0.0112
3.48923	-0.00656
3.50431	-0.00656
3.51939	-0.00656
3.53447	-0.00656
3.54955	-0.00656
3.56463	-0.00656
3.57971	-0.00656
3.59479	-0.00686
3.60987	-0.00686
3.62495	-0.00686
3.64003	-0.00686
3.65511	-0.00686
3.67019	-0.00686
3.68527	-0.00686
3.70035	-0.00686
3.71543	-0.00686
3.73051	-0.00686
3.74559	-0.00686
3.76067	-0.00686
3.77576	-0.00686
3.79083	-0.00686
3.80592	-0.00686
3.821	-0.00686
3.83608	-0.00686
3.85116	-0.00686
3.86624	-0.00686
3.88132	-0.00686
3.8964	-0.00686
3.91148	-0.00686
3.92656	-0.00686
3.94164	-0.00686
3.95672	-0.00686
3.9718	-0.00686
3.98688	-0.00686
4.00196	-0.00686
4.01704	-0.00686
4.03212	-0.00686
4.0472	-0.00686
4.06228	-0.00686
4.07736	-0.0115
4.09244	-0.0115

## Sheet: C
UAS:opto-tool or control	sample number	trial number	yes:tail moved not included: tail moved before the light no: tail not moved
UAS:opto-tool	1	1	not included
UAS:opto-tool	1	2	no
UAS:opto-tool	1	3	yes
UAS:opto-tool	1	4	no
UAS:opto-tool	1	5	yes
UAS:opto-tool	1	6	yes
UAS:opto-tool	2	1	yes
UAS:opto-tool	2	2	not included
UAS:opto-tool	2	3	no
UAS:opto-tool	2	4	yes
UAS:opto-tool	2	5	yes
UAS:opto-tool	2	6	no
UAS:opto-tool	3	1	not included
UAS:opto-tool	3	2	yes
UAS:opto-tool	3	3	not included
UAS:opto-tool	3	4	no
UAS:opto-tool	3	5	no
UAS:opto-tool	3	6	no
UAS:opto-tool	4	1	yes
UAS:opto-tool	4	2	yes
UAS:opto-tool	4	3	no
UAS:opto-tool	4	4	yes
UAS:opto-tool	4	5	no
UAS:opto-tool	4	6	yes
UAS:opto-tool	5	1	no
UAS:opto-tool	5	2	no
UAS:opto-tool	5	3	no
UAS:opto-tool	5	4	yes
UAS:opto-tool	5	5	no
UAS:opto-tool	5	6	no
UAS:opto-tool	6	1	no
UAS:opto-tool	6	2	yes
UAS:opto-tool	6	3	no
UAS:opto-tool	6	4	yes
UAS:opto-tool	6	5	yes
UAS:opto-tool	6	6	yes
UAS:opto-tool	7	1	yes
UAS:opto-tool	7	2	no
UAS:opto-tool	7	3	no
UAS:opto-tool	7	4	yes
UAS:opto-tool	7	5	yes
UAS:opto-tool	7	6	yes
UAS:opto-tool	8	1	no
UAS:opto-tool	8	2	yes
UAS:opto-tool	8	3	yes
UAS:opto-tool	8	4	yes
UAS:opto-tool	8	5	yes
UAS:opto-tool	8	6	no
control	1	1	no
control	1	2	no
control	1	3	no
control	1	4	no
control	1	5	yes
control	1	6	no
control	2	1	no
control	2	2	no
control	2	3	no
control	2	4	no
control	2	5	no
control	2	6	no
control	3	1	no
control	3	2	no
control	3	3	yes
control	3	4	yes
control	3	5	yes
control	3	6	yes
control	4	1	no
control	4	2	no
control	4	3	no
control	4	4	no
control	4	5	no
control	4	6	no
control	5	1	no
control	5	2	no
control	5	3	no
control	5	4	no
control	5	5	no
control	5	6	no
control	6	1	no
control	6	2	no
control	6	3	no
control	6	4	no
control	6	5	no
control	6	6	no
control	7	1	no
control	7	2	no
control	7	3	no
control	7	4	no
control	7	5	no
control	7	6	no
control	8	1	no
control	8	2	no
control	8	3	no
control	8	4	no
control	8	5	no
control	8	6	no

## Sheet: D
sample number	trial number	latency
1	3	1.124
1	5	0.172
1	6	0.834
2	1	0.1
2	4	0.304
2	5	0.991
3	2	0.16
4	1	5.304
4	2	2.563
4	4	1.637
4	6	0.402
5	4	0.93
6	2	0.422
6	4	0.195
6	5	0.27
6	6	0.45
7	1	0.42
7	4	0.36
7	5	0.51
7	6	0.824
8	2	0.494
8	3	0.555
8	4	0.27
8	5	0.509

## Sheet: E
sample number	trial number	duration
1	3	1.653
1	5	2.568
1	6	3.466
2	1	1.91
2	4	1.35
2	5	1.669
3	2	1.52
4	1	3.227
4	2	1.923
4	4	1.65
4	6	2.268
5	4	0.92
6	2	3.06
6	4	2.897
6	5	3.676
6	6	6.088
7	1	2.193
7	4	2.193
7	5	2.642
7	6	1.833
8	2	1.384
8	3	2.013
8	4	0.724
8	5	1.204

## Sheet: F
sample number	trial number	strength
1	3	0.48756
1	5	0.811848
1	6	0.831978
2	1	0.619506
2	4	0.381176
2	5	0.478421
3	2	0.418199
4	1	1.03047
4	2	1.10737
4	4	0.980942
4	6	1.07405
5	4	0.989574
6	2	0.838472
6	4	1.04811
6	5	0.699555
6	6	0.471954
7	1	1.03693
7	4	1.22718
7	5	1.13597
7	6	1.10619
8	2	1.08152
8	3	0.878769
8	4	0.880486
8	5	1.03533
