# Supplementary material for: Optogenetic manipulation of neuronal and cardiomyocyte functions in zebrafish using microbial rhodopsins and adenylyl cyclases
Source: eLife. 2023 Aug 17;12:e83975. doi: 10.7554/eLife.83975 (PMC10435232; doi:10.7554/eLife.83975)
Supplement: Figure 7—figure supplement 2—source data 1. [file elife-83975-fig7-figsupp2-data1.xlsx]

## Sheet: B
Line	Frame	X	Y
bPAC-MT	1	0	0.99101
bPAC-MT	2	0.0333333	0.989748
bPAC-MT	3	0.0666667	0.996372
bPAC-MT	4	0.1	0.996688
bPAC-MT	5	0.133333	1.00694
bPAC-MT	6	0.166667	1.01226
bPAC-MT	7	0.2	1.02358
bPAC-MT	8	0.233333	1.01782
bPAC-MT	9	0.266667	1.00591
bPAC-MT	10	0.3	0.998147
bPAC-MT	11	0.333333	1.00347
bPAC-MT	12	0.366667	0.996294
bPAC-MT	13	0.4	0.996885
bPAC-MT	14	0.433333	0.999211
bPAC-MT	15	0.466667	1.00268
bPAC-MT	16	0.5	1.00812
bPAC-MT	17	0.533333	1.0099
bPAC-MT	18	0.566667	1.0371
bPAC-MT	19	0.6	1.02949
bPAC-MT	20	0.633333	1.01463
bPAC-MT	21	0.666667	1.00481
bPAC-MT	22	0.7	1.00221
bPAC-MT	23	0.733333	0.998383
bPAC-MT	24	0.766667	1
bPAC-MT	25	0.8	0.990931
bPAC-MT	26	0.833333	0.98407
bPAC-MT	27	0.866667	1.00386
bPAC-MT	28	0.9	1.01522
bPAC-MT	29	0.933333	1.03466
bPAC-MT	30	0.966667	1.03892
bPAC-MT	31	1	1.01593
bPAC-MT	32	1.03333	0.999172
bPAC-MT	33	1.06667	0.996057
bPAC-MT	34	1.1	0.992035
bPAC-MT	35	1.13333	0.989866
bPAC-MT	36	1.16667	0.985174
bPAC-MT	37	1.2	0.980285
bPAC-MT	38	1.23333	0.982848
bPAC-MT	39	1.26667	1.00804
bPAC-MT	40	1.3	1.02058
bPAC-MT	41	1.33333	1.02863
bPAC-MT	42	1.36667	1.01688
bPAC-MT	43	1.4	1.00335
bPAC-MT	44	1.43333	1.00284
bPAC-MT	45	1.46667	0.997437
bPAC-MT	46	1.5	0.992666
bPAC-MT	47	1.53333	0.997476
bPAC-MT	48	1.56667	0.99795
bPAC-MT	49	1.6	0.980206
bPAC-MT	50	1.63333	1.00379
bPAC-MT	51	1.66667	1.01538
bPAC-MT	52	1.7	1.0194
bPAC-MT	53	1.73333	1.02133
bPAC-MT	54	1.76667	1.00658
bPAC-MT	55	1.8	0.996727
bPAC-MT	56	1.83333	0.991404
bPAC-MT	57	1.86667	0.990103
bPAC-MT	58	1.9	1.00682
bPAC-MT	59	1.93333	0.993652
bPAC-MT	60	1.96667	0.989038
bPAC-MT	61	2	0.989906
bPAC-MT	62	2.03333	1.0071
bPAC-MT	63	2.06667	1.02184
bPAC-MT	64	2.1	1.03636
bPAC-MT	65	2.13333	1.02157
bPAC-MT	66	2.16667	1.00836
bPAC-MT	67	2.2	1.003
bPAC-MT	68	2.23333	0.995347
bPAC-MT	69	2.26667	0.99582
bPAC-MT	70	2.3	0.997595
bPAC-MT	71	2.33333	0.989787
bPAC-MT	72	2.36667	0.985963
bPAC-MT	73	2.4	1.0026
bPAC-MT	74	2.43333	0.992114
bPAC-MT	75	2.46667	1.00442
bPAC-MT	76	2.5	1.02188
bPAC-MT	77	2.53333	1.02141
bPAC-MT	78	2.56667	0.999645
bPAC-MT	79	2.6	1.00114
bPAC-MT	80	2.63333	0.99515
bPAC-MT	81	2.66667	0.995899
bPAC-MT	82	2.7	0.997161
bPAC-MT	83	2.73333	0.987895
bPAC-MT	84	2.76667	0.996372
bPAC-MT	85	2.8	1.00142
bPAC-MT	86	2.83333	1.00426
bPAC-MT	87	2.86667	1.01483
bPAC-MT	88	2.9	1.02563
bPAC-MT	89	2.93333	1.02819
bPAC-MT	90	2.96667	1.00225
bPAC-MT	91	3	0.991641
bPAC-MT	92	3.03333	0.994007
bPAC-MT	93	3.06667	0.99101
bPAC-MT	94	3.1	0.990537
bPAC-MT	95	3.13333	0.986475
bPAC-MT	96	3.16667	0.993928
bPAC-MT	97	3.2	1.00461
bPAC-MT	98	3.23333	1.01301
bPAC-MT	99	3.26667	1.02173
bPAC-MT	100	3.3	1.03273
bPAC-MT	101	3.33333	1.01979
bPAC-MT	102	3.36667	1.00095
bPAC-MT	103	3.4	0.990852
bPAC-MT	104	3.43333	0.992548
bPAC-MT	105	3.46667	0.991483
bPAC-MT	106	3.5	0.984583
bPAC-MT	107	3.53333	0.985568
bPAC-MT	108	3.56667	0.994559
bPAC-MT	109	3.6	1.00272
bPAC-MT	110	3.63333	1.00986
bPAC-MT	111	3.66667	1.02555
bPAC-MT	112	3.7	1.03064
bPAC-MT	113	3.73333	1.02094
bPAC-MT	114	3.76667	1.01092
bPAC-MT	115	3.8	0.992863
bPAC-MT	116	3.83333	1.00229
bPAC-MT	117	3.86667	0.990931
bPAC-MT	118	3.9	0.986594
bPAC-MT	119	3.93333	0.983715
bPAC-MT	120	3.96667	0.996294
bPAC-MT	121	4	1.01088
bPAC-MT	122	4.03333	1.0123
bPAC-MT	123	4.06667	1.03758
bPAC-MT	124	4.1	1.03959
bPAC-MT	125	4.13333	1.02173
bPAC-MT	126	4.16667	1.0151
bPAC-MT	127	4.2	1.00505
bPAC-MT	128	4.23333	1.00241
bPAC-MT	129	4.26667	0.998502
bPAC-MT	130	4.3	0.983991
bPAC-MT	131	4.33333	0.984031
bPAC-MT	132	4.36667	0.994992
bPAC-MT	133	4.4	1.00284
bPAC-MT	134	4.43333	1.00643
bPAC-MT	135	4.46667	1.01388
bPAC-MT	136	4.5	1.02658
bPAC-MT	137	4.53333	1.01577
bPAC-MT	138	4.56667	1.00658
bPAC-MT	139	4.6	1.00489
bPAC-MT	140	4.63333	0.989985
bPAC-MT	141	4.66667	0.987934
bPAC-MT	142	4.7	0.985332
bPAC-MT	143	4.73333	0.995623
bPAC-MT	144	4.76667	0.995741
bPAC-MT	145	4.8	0.995387
bPAC-MT	146	4.83333	0.994598
bPAC-MT	147	4.86667	1.01557
bPAC-MT	148	4.9	1.02255
bPAC-MT	149	4.93333	1.00954
bPAC-MT	150	4.96667	1.00063
bPAC-MT	151	5	0.994716
bPAC-MT	152	5.03333	0.997752
bPAC-MT	153	5.06667	0.99724
bPAC-MT	154	5.1	0.981546
bPAC-MT	155	5.13333	0.98265
bPAC-MT	156	5.16667	0.986042
bPAC-MT	157	5.2	0.989038
bPAC-MT	158	5.23333	0.999054
bPAC-MT	159	5.26667	1.01869
bPAC-MT	160	5.3	1.02046
bPAC-MT	161	5.33333	1.00655
bPAC-MT	162	5.36667	1.00138
bPAC-MT	163	5.4	0.991956
bPAC-MT	164	5.43333	0.997043
bPAC-MT	165	5.46667	0.984228
bPAC-MT	166	5.5	0.977682
bPAC-MT	167	5.53333	0.986909
bPAC-MT	168	5.56667	0.986554
bPAC-MT	169	5.6	0.98407
bPAC-MT	170	5.63333	0.992153
bPAC-MT	171	5.66667	1.0123
bPAC-MT	172	5.7	1.01806
bPAC-MT	173	5.73333	1.00244
bPAC-MT	174	5.76667	0.997043
bPAC-MT	175	5.8	0.997595
bPAC-MT	176	5.83333	0.989827
bPAC-MT	177	5.86667	0.985135
bPAC-MT	178	5.9	0.988604
bPAC-MT	179	5.93333	0.981665
bPAC-MT	180	5.96667	0.992587
bPAC-MT	181	6	0.982808
bPAC-MT	182	6.03333	1.00106
bPAC-MT	183	6.06667	1.00453
bPAC-MT	184	6.1	1.0155
bPAC-MT	185	6.13333	1.00781
bPAC-MT	186	6.16667	1.00513
bPAC-MT	187	6.2	0.994795
bPAC-MT	188	6.23333	0.99377
bPAC-MT	189	6.26667	0.98269
bPAC-MT	190	6.3	0.98202
bPAC-MT	191	6.33333	0.983203
bPAC-MT	192	6.36667	0.984977
bPAC-MT	193	6.4	0.987855
bPAC-MT	194	6.43333	0.996806
bPAC-MT	195	6.46667	1.00513
bPAC-MT	196	6.5	1.01534
bPAC-MT	197	6.53333	1.01262
bPAC-MT	198	6.56667	1.01053
bPAC-MT	199	6.6	0.993612
bPAC-MT	200	6.63333	0.996018
bPAC-MT	201	6.66667	0.987737
bPAC-MT	202	6.7	0.981507
bPAC-MT	203	6.73333	0.984267
bPAC-MT	204	6.76667	0.980521
bPAC-MT	205	6.8	0.989511
bPAC-MT	206	6.83333	0.990773
bPAC-MT	207	6.86667	0.994756
bPAC-MT	208	6.9	1.00489
bPAC-MT	209	6.93333	1.00059
bPAC-MT	210	6.96667	1.00079
bPAC-MT	211	7	0.992153
bPAC-MT	212	7.03333	0.980679
bPAC-MT	213	7.06667	0.982532
bPAC-MT	214	7.1	0.983084
bPAC-MT	215	7.13333	0.982848
bPAC-MT	216	7.16667	0.981823
bPAC-MT	217	7.2	0.983084
bPAC-MT	218	7.23333	0.984977
bPAC-MT	219	7.26667	1.00142
bPAC-MT	220	7.3	1.00079
bPAC-MT	221	7.33333	0.998265
bPAC-MT	222	7.36667	0.998265
bPAC-MT	223	7.4	0.993297
bPAC-MT	224	7.43333	0.990576
bPAC-MT	225	7.46667	0.991562
bPAC-MT	226	7.5	0.995741
bPAC-MT	227	7.53333	0.98545
bPAC-MT	228	7.56667	0.984819
bPAC-MT	229	7.6	0.990142
bPAC-MT	230	7.63333	0.983281
bPAC-MT	231	7.66667	0.978707
bPAC-MT	232	7.7	0.989275
bPAC-MT	233	7.73333	0.999527
bPAC-MT	234	7.76667	1.00631
bPAC-MT	235	7.8	1.00887
bPAC-MT	236	7.83333	1.00292
bPAC-MT	237	7.86667	1.00177
bPAC-MT	238	7.9	0.982098
bPAC-MT	239	7.93333	0.978983
bPAC-MT	240	7.96667	0.976894
bPAC-MT	241	8	0.976894
bPAC-MT	242	8.03333	0.978668
bPAC-MT	243	8.06667	0.978944
bPAC-MT	244	8.1	0.980127
bPAC-MT	245	8.13333	0.983479
bPAC-MT	246	8.16667	0.992508
bPAC-MT	247	8.2	0.995663
bPAC-MT	248	8.23333	0.992666
bPAC-MT	249	8.26667	0.982927
bPAC-MT	250	8.3	0.981231
bPAC-MT	251	8.33333	0.983479
bPAC-MT	252	8.36667	0.988052
bPAC-MT	253	8.4	0.985805
bPAC-MT	254	8.43333	0.976894
bPAC-MT	255	8.46667	0.977248
bPAC-MT	256	8.5	0.97504
bPAC-MT	257	8.53333	0.982887
bPAC-MT	258	8.56667	0.99239
bPAC-MT	259	8.6	0.998107
bPAC-MT	260	8.63333	0.997516
bPAC-MT	261	8.66667	0.990734
bPAC-MT	262	8.7	0.984307
bPAC-MT	263	8.73333	0.98687
bPAC-MT	264	8.76667	0.986515
bPAC-MT	265	8.8	0.982217
bPAC-MT	266	8.83333	0.980324
bPAC-MT	267	8.86667	0.976381
bPAC-MT	268	8.9	0.977012
bPAC-MT	269	8.93333	0.988407
bPAC-MT	270	8.96667	0.990576
bPAC-MT	271	9	0.992902
bPAC-MT	272	9.03333	0.988407
bPAC-MT	273	9.06667	0.996412
bPAC-MT	274	9.1	0.983557
bPAC-MT	275	9.13333	0.989433
bPAC-MT	276	9.16667	0.990537
bPAC-MT	277	9.2	0.991404
bPAC-MT	278	9.23333	0.98474
bPAC-MT	279	9.26667	0.980442
bPAC-MT	280	9.3	0.976302
bPAC-MT	281	9.33333	0.986042
bPAC-MT	282	9.36667	0.998502
bPAC-MT	283	9.4	1.00103
bPAC-MT	284	9.43333	0.996215
bPAC-MT	285	9.46667	0.995111
bPAC-MT	286	9.5	0.992035
bPAC-MT	287	9.53333	0.986988
bPAC-MT	288	9.56667	0.985529
bPAC-MT	289	9.6	0.984307
bPAC-MT	290	9.63333	0.981783
bPAC-MT	291	9.66667	0.981468
bPAC-MT	292	9.7	0.979733
bPAC-MT	293	9.73333	0.98474
bPAC-MT	294	9.76667	0.980285
bPAC-MT	295	9.8	0.9931
bPAC-MT	296	9.83333	0.99862
bPAC-MT	297	9.86667	0.981941
bPAC-MT	298	9.9	0.98549
bPAC-MT	299	9.93333	0.981389
bPAC-MT	300	9.96667	0.979417
bPAC-MT	301	10	0.992902
bPAC-MT	302	10.0333	0.984898
bPAC-MT	303	10.0667	0.984385
bPAC-MT	304	10.1	0.982098
bPAC-MT	305	10.1333	0.989511
bPAC-MT	306	10.1667	1.00162
bPAC-MT	307	10.2	1.00244
bPAC-MT	308	10.2333	1.00371
bPAC-MT	309	10.2667	0.997555
bPAC-MT	310	10.3	0.994164
bPAC-MT	311	10.3333	1.00106
bPAC-MT	312	10.3667	0.996057
bPAC-MT	313	10.4	0.994716
bPAC-MT	314	10.4333	0.978589
bPAC-MT	315	10.4667	0.986791
bPAC-MT	316	10.5	0.978944
bPAC-MT	317	10.5333	0.977761
bPAC-MT	318	10.5667	0.979575
bPAC-MT	319	10.6	0.985135
bPAC-MT	320	10.6333	0.991917
bPAC-MT	321	10.6667	0.996648
bPAC-MT	322	10.7	0.993297
bPAC-MT	323	10.7333	0.992863
bPAC-MT	324	10.7667	0.983912
bPAC-MT	325	10.8	0.984543
bPAC-MT	326	10.8333	0.984149
bPAC-MT	327	10.8667	0.987106
bPAC-MT	328	10.9	0.98549
bPAC-MT	329	10.9333	0.978274
bPAC-MT	330	10.9667	0.983676
bPAC-MT	331	11	0.978313
bPAC-MT	332	11.0333	0.993928
bPAC-MT	333	11.0667	0.985726
bPAC-MT	334	11.1	0.99862
bPAC-MT	335	11.1333	0.986791
bPAC-MT	336	11.1667	0.983873
bPAC-MT	337	11.2	0.991877
bPAC-MT	338	11.2333	0.995032
bPAC-MT	339	11.2667	0.990734
bPAC-MT	340	11.3	0.991365
bPAC-MT	341	11.3333	0.983873
bPAC-MT	342	11.3667	0.982927
bPAC-MT	343	11.4	0.99657
bPAC-MT	344	11.4333	0.980166
bPAC-MT	345	11.4667	0.98963
bPAC-MT	346	11.5	0.98963
bPAC-MT	347	11.5333	0.99515
bPAC-MT	348	11.5667	0.988762
bPAC-MT	349	11.6	0.991483
bPAC-MT	350	11.6333	1.00272
bPAC-MT	351	11.6667	0.987974
bPAC-MT	352	11.7	0.984701
bPAC-MT	353	11.7333	0.978747
bPAC-MT	354	11.7667	0.979023
bPAC-MT	355	11.8	0.980482
bPAC-MT	356	11.8333	0.982098
bPAC-MT	357	11.8667	0.983952
bPAC-MT	358	11.9	0.983203
bPAC-MT	359	11.9333	0.979733
bPAC-MT	360	11.9667	0.985174
bPAC-MT	361	12	0.990734
bPAC-MT	362	12.0333	0.979259
bPAC-MT	363	12.0667	0.978865
bPAC-MT	364	12.1	0.9834
bPAC-MT	365	12.1333	0.983557
bPAC-MT	366	12.1667	0.981665
bPAC-MT	367	12.2	0.983242
bPAC-MT	368	12.2333	0.978826
bPAC-MT	369	12.2667	0.978865
bPAC-MT	370	12.3	0.988052
bPAC-MT	371	12.3333	0.987422
bPAC-MT	372	12.3667	0.996057
bPAC-MT	373	12.4	0.999409
bPAC-MT	374	12.4333	0.996727
bPAC-MT	375	12.4667	0.992626
bPAC-MT	376	12.5	0.994401
bPAC-MT	377	12.5333	0.991562
bPAC-MT	378	12.5667	0.986554
bPAC-MT	379	12.6	0.987974
bPAC-MT	380	12.6333	0.985292
bPAC-MT	381	12.6667	0.986199
bPAC-MT	382	12.7	1.00185
bPAC-MT	383	12.7333	0.997319
bPAC-MT	384	12.7667	0.99586
bPAC-MT	385	12.8	0.994007
bPAC-MT	386	12.8333	0.997161
bPAC-MT	387	12.8667	1.00619
bPAC-MT	388	12.9	0.987027
bPAC-MT	389	12.9333	0.985371
bPAC-MT	390	12.9667	0.983084
bPAC-MT	391	13	0.979654
bPAC-MT	392	13.0333	0.978983
bPAC-MT	393	13.0667	0.979535
bPAC-MT	394	13.1	0.979693
bPAC-MT	395	13.1333	0.976105
bPAC-MT	396	13.1667	0.986318
bPAC-MT	397	13.2	0.989945
bPAC-MT	398	13.2333	0.996885
bPAC-MT	399	13.2667	0.997476
bPAC-MT	400	13.3	0.998896
bPAC-MT	401	13.3333	0.985056
bPAC-MT	402	13.3667	0.984346
bPAC-MT	403	13.4	0.975868
bPAC-MT	404	13.4333	0.984859
bPAC-MT	405	13.4667	0.991956
bPAC-MT	406	13.5	0.992902
bPAC-MT	407	13.5333	0.98474
bPAC-MT	408	13.5667	0.981823
bPAC-MT	409	13.6	0.987619
bPAC-MT	410	13.6333	0.998029
bPAC-MT	411	13.6667	0.994559
bPAC-MT	412	13.7	1.00162
bPAC-MT	413	13.7333	0.999527
bPAC-MT	414	13.7667	0.993297
bPAC-MT	415	13.8	0.98963
bPAC-MT	416	13.8333	0.988762
bPAC-MT	417	13.8667	0.990063
bPAC-MT	418	13.9	0.987619
bPAC-MT	419	13.9333	0.986475
bPAC-MT	420	13.9667	0.986948
bPAC-MT	421	14	0.995544
bPAC-MT	422	14.0333	0.995387
bPAC-MT	423	14.0667	0.992469
bPAC-MT	424	14.1	0.990813
bPAC-MT	425	14.1333	0.990694
bPAC-MT	426	14.1667	0.999448
bPAC-MT	427	14.2	0.996254
bPAC-MT	428	14.2333	0.983163
bPAC-MT	429	14.2667	0.98336
bPAC-MT	430	14.3	0.982098
bPAC-MT	431	14.3333	0.982217
bPAC-MT	432	14.3667	0.977761
bPAC-MT	433	14.4	0.98127
bPAC-MT	434	14.4333	0.973936
bPAC-MT	435	14.4667	0.975238
bPAC-MT	436	14.5	0.9931
bPAC-MT	437	14.5333	0.991404
bPAC-MT	438	14.5667	0.989827
bPAC-MT	439	14.6	0.996727
bPAC-MT	440	14.6333	0.988526
bPAC-MT	441	14.6667	0.988526
bPAC-MT	442	14.7	0.986002
bPAC-MT	443	14.7333	0.982098
bPAC-MT	444	14.7667	0.98269
bPAC-MT	445	14.8	0.984622
bPAC-MT	446	14.8333	0.985056
bPAC-MT	447	14.8667	0.979457
bPAC-MT	448	14.9	0.986475
bPAC-MT	449	14.9333	0.980206
bPAC-MT	450	14.9667	0.98336
bPAC-MT	451	15	0.992548
bPAC-MT	452	15.0333	0.992824
bPAC-MT	453	15.0667	0.984464
bPAC-MT	454	15.1	0.982493
bPAC-MT	455	15.1333	0.98474
bPAC-MT	456	15.1667	0.984109
bPAC-MT	457	15.2	0.98474
bPAC-MT	458	15.2333	0.978431
bPAC-MT	459	15.2667	0.981744
bPAC-MT	460	15.3	0.978274
bPAC-MT	461	15.3333	0.980482
bPAC-MT	462	15.3667	0.985805
bPAC-MT	463	15.4	0.984109
bPAC-MT	464	15.4333	0.986791
bPAC-MT	465	15.4667	0.987619
bPAC-MT	466	15.5	0.983045
bPAC-MT	467	15.5333	0.993691
bPAC-MT	468	15.5667	0.980127
bPAC-MT	469	15.6	0.978983
bPAC-MT	470	15.6333	0.981941
bPAC-MT	471	15.6667	0.977564
bPAC-MT	472	15.7	0.970861
bPAC-MT	473	15.7333	0.985292
bPAC-MT	474	15.7667	0.98687
bPAC-MT	475	15.8	0.990813
bPAC-MT	476	15.8333	0.98616
bPAC-MT	477	15.8667	0.983833
bPAC-MT	478	15.9	0.984228
bPAC-MT	479	15.9333	0.982808
bPAC-MT	480	15.9667	0.985687
bPAC-MT	481	16	0.977091
bPAC-MT	482	16.0333	0.974567
bPAC-MT	483	16.0667	0.978155
bPAC-MT	484	16.1	0.972635
bPAC-MT	485	16.1333	0.979772
bPAC-MT	486	16.1667	0.983518
bPAC-MT	487	16.2	0.98892
bPAC-MT	488	16.2333	0.992232
bPAC-MT	489	16.2667	0.990537
bPAC-MT	490	16.3	0.98892
bPAC-MT	491	16.3333	0.990852
bPAC-MT	492	16.3667	0.979812
bPAC-MT	493	16.4	0.979693
bPAC-MT	494	16.4333	0.978747
bPAC-MT	495	16.4667	0.978944
bPAC-MT	496	16.5	0.98131
bPAC-MT	497	16.5333	0.982729
bPAC-MT	498	16.5667	0.979851
bPAC-MT	499	16.6	0.976539
bPAC-MT	500	16.6333	0.975277
bPAC-MT	501	16.6667	0.990418
bPAC-MT	502	16.7	0.987422
bPAC-MT	503	16.7333	0.990852
bPAC-MT	504	16.7667	0.988959
bPAC-MT	505	16.8	0.979338
bPAC-MT	506	16.8333	0.980166
bPAC-MT	507	16.8667	0.981349
bPAC-MT	508	16.9	0.979378
bPAC-MT	509	16.9333	0.979733
bPAC-MT	510	16.9667	0.977209
bPAC-MT	511	17	0.977012
bPAC-MT	512	17.0333	0.978905
bPAC-MT	513	17.0667	0.982414
bPAC-MT	514	17.1	0.986594
bPAC-MT	515	17.1333	0.987698
bPAC-MT	516	17.1667	0.994322
bPAC-MT	517	17.2	0.994598
bPAC-MT	518	17.2333	0.993533
bPAC-MT	519	17.2667	0.980758
bPAC-MT	520	17.3	0.97855
bPAC-MT	521	17.3333	0.980955
bPAC-MT	522	17.3667	0.975316
bPAC-MT	523	17.4	0.974055
bPAC-MT	524	17.4333	0.979614
bPAC-MT	525	17.4667	0.975592
bPAC-MT	526	17.5	0.975435
bPAC-MT	527	17.5333	0.976775
bPAC-MT	528	17.5667	0.976736
bPAC-MT	529	17.6	0.980994
bPAC-MT	530	17.6333	0.97855
bPAC-MT	531	17.6667	0.984819
bPAC-MT	532	17.7	0.979457
bPAC-MT	533	17.7333	0.976775
bPAC-MT	534	17.7667	0.978037
bPAC-MT	535	17.8	0.979496
bPAC-MT	536	17.8333	0.981231
bPAC-MT	537	17.8667	0.976381
bPAC-MT	538	17.9	0.974528
bPAC-MT	539	17.9333	0.974725
bPAC-MT	540	17.9667	0.975514
bPAC-MT	541	18	0.977998
bPAC-MT	542	18.0333	0.97575
bPAC-MT	543	18.0667	0.973936
bPAC-MT	544	18.1	0.974173
bPAC-MT	545	18.1333	0.985726
bPAC-MT	546	18.1667	0.98687
bPAC-MT	547	18.2	0.984938
bPAC-MT	548	18.2333	0.975435
bPAC-MT	549	18.2667	0.981941
bPAC-MT	550	18.3	0.975947
bPAC-MT	551	18.3333	0.978155
bPAC-MT	552	18.3667	0.975514
bPAC-MT	553	18.4	0.972201
bPAC-MT	554	18.4333	0.973976
bPAC-MT	555	18.4667	0.97504
bPAC-MT	556	18.5	0.975001
bPAC-MT	557	18.5333	0.976736
bPAC-MT	558	18.5667	0.975198
bPAC-MT	559	18.6	0.985135
bPAC-MT	560	18.6333	0.980206
bPAC-MT	561	18.6667	0.978865
bPAC-MT	562	18.7	0.977248
bPAC-MT	563	18.7333	0.977091
bPAC-MT	564	18.7667	0.972832
bPAC-MT	565	18.8	0.975238
bPAC-MT	566	18.8333	0.976775
bPAC-MT	567	18.8667	0.974015
bPAC-MT	568	18.9	0.975474
bPAC-MT	569	18.9333	0.972793
bPAC-MT	570	18.9667	0.978944
bPAC-MT	571	19	0.979575
bPAC-MT	572	19.0333	0.982256
bPAC-MT	573	19.0667	0.973621
bPAC-MT	574	19.1	0.97713
bPAC-MT	575	19.1333	0.984859
bPAC-MT	576	19.1667	0.979181
bPAC-MT	577	19.2	0.980521
bPAC-MT	578	19.2333	0.973424
bPAC-MT	579	19.2667	0.978826
bPAC-MT	580	19.3	0.981389
bPAC-MT	581	19.3333	0.981349
bPAC-MT	582	19.3667	0.98198
bPAC-MT	583	19.4	0.986515
bPAC-MT	584	19.4333	0.980994
bPAC-MT	585	19.4667	0.978471
bPAC-MT	586	19.5	0.978274
bPAC-MT	587	19.5333	0.97993
bPAC-MT	588	19.5667	0.987303
bPAC-MT	589	19.6	0.979733
bPAC-MT	590	19.6333	0.988289
bPAC-MT	591	19.6667	0.978707
bPAC-MT	592	19.7	0.976302
bPAC-MT	593	19.7333	0.982493
bPAC-MT	594	19.7667	0.981389
bPAC-MT	595	19.8	0.975947
bPAC-MT	596	19.8333	0.978155
bPAC-MT	597	19.8667	0.977682
bPAC-MT	598	19.9	0.979299
bPAC-MT	599	19.9333	0.974725
bPAC-MT	600	19.9667	0.978668
bPAC-MT	601	20	0.978707
bPAC-MT	602	20.0333	0.976184
bPAC-MT	603	20.0667	0.970506
bPAC-MT	604	20.1	0.969047
bPAC-MT	605	20.1333	0.974252
bPAC-MT	606	20.1667	0.974843
bPAC-MT	607	20.2	0.976775
bPAC-MT	608	20.2333	0.977722
bPAC-MT	609	20.2667	0.97784
bPAC-MT	610	20.3	0.978155
bPAC-MT	611	20.3333	0.985135
bPAC-MT	612	20.3667	0.982414
bPAC-MT	613	20.4	0.977682
bPAC-MT	614	20.4333	0.986988
bPAC-MT	615	20.4667	0.986002
bPAC-MT	616	20.5	0.989393
bPAC-MT	617	20.5333	0.989866
bPAC-MT	618	20.5667	0.989866
bPAC-MT	619	20.6	0.995623
bPAC-MT	620	20.6333	0.983991
bPAC-MT	621	20.6667	0.991207
bPAC-MT	622	20.7	0.983321
bPAC-MT	623	20.7333	0.984464
bPAC-MT	624	20.7667	0.976933
bPAC-MT	625	20.8	0.978905
bPAC-MT	626	20.8333	0.978944
bPAC-MT	627	20.8667	0.977682
bPAC-MT	628	20.9	0.977446
bPAC-MT	629	20.9333	0.976381
bPAC-MT	630	20.9667	0.979614
bPAC-MT	631	21	0.982808
bPAC-MT	632	21.0333	0.988486
bPAC-MT	633	21.0667	0.996057
bPAC-MT	634	21.1	0.997476
bPAC-MT	635	21.1333	0.996451
bPAC-MT	636	21.1667	0.98888
bPAC-MT	637	21.2	0.975947
bPAC-MT	638	21.2333	0.971886
bPAC-MT	639	21.2667	0.973305
bPAC-MT	640	21.3	0.97713
bPAC-MT	641	21.3333	0.979772
bPAC-MT	642	21.3667	0.979733
bPAC-MT	643	21.4	0.9834
bPAC-MT	644	21.4333	0.987146
bPAC-MT	645	21.4667	0.983321
bPAC-MT	646	21.5	0.986357
bPAC-MT	647	21.5333	0.984425
bPAC-MT	648	21.5667	0.983557
bPAC-MT	649	21.6	0.990261
bPAC-MT	650	21.6333	0.992824
bPAC-MT	651	21.6667	0.984228
bPAC-MT	652	21.7	0.989433
bPAC-MT	653	21.7333	0.988644
bPAC-MT	654	21.7667	0.990063
bPAC-MT	655	21.8	0.985056
bPAC-MT	656	21.8333	0.980955
bPAC-MT	657	21.8667	0.983991
bPAC-MT	658	21.9	0.979575
bPAC-MT	659	21.9333	0.982138
bPAC-MT	660	21.9667	0.980797
bPAC-MT	661	22	0.978905
bPAC-MT	662	22.0333	0.989433
bPAC-MT	663	22.0667	0.987501
bPAC-MT	664	22.1	0.985608
bPAC-MT	665	22.1333	0.976775
bPAC-MT	666	22.1667	0.976144
bPAC-MT	667	22.2	0.981073
bPAC-MT	668	22.2333	0.983873
bPAC-MT	669	22.2667	0.977288
bPAC-MT	670	22.3	0.976854
bPAC-MT	671	22.3333	0.982493
bPAC-MT	672	22.3667	0.976342
bPAC-MT	673	22.4	0.990458
bPAC-MT	674	22.4333	1.00142
bPAC-MT	675	22.4667	1.0017
bPAC-MT	676	22.5	0.990103
bPAC-MT	677	22.5333	1.0151
bPAC-MT	678	22.5667	1.00745
bPAC-MT	679	22.6	0.99586
bPAC-MT	680	22.6333	0.986318
bPAC-MT	681	22.6667	0.98616
bPAC-MT	682	22.7	0.978944
bPAC-MT	683	22.7333	0.974686
bPAC-MT	684	22.7667	0.979733
bPAC-MT	685	22.8	0.983281
bPAC-MT	686	22.8333	0.996688
bPAC-MT	687	22.8667	1.00852
bPAC-MT	688	22.9	0.99448
bPAC-MT	689	22.9333	1.01534
bPAC-MT	690	22.9667	1.03912
bPAC-MT	691	23	1.01289
bPAC-MT	692	23.0333	0.982098
bPAC-MT	693	23.0667	0.978313
bPAC-MT	694	23.1	0.985135
bPAC-MT	695	23.1333	0.985766
bPAC-MT	696	23.1667	0.991168
bPAC-MT	697	23.2	0.987855
bPAC-MT	698	23.2333	0.983242
bPAC-MT	699	23.2667	0.977248
bPAC-MT	700	23.3	0.96747
bPAC-MT	701	23.3333	0.97019
bPAC-MT	702	23.3667	0.973503
bPAC-MT	703	23.4	0.973384
bPAC-MT	704	23.4333	0.972753
bPAC-MT	705	23.4667	0.964236
bPAC-MT	706	23.5	0.964749
bPAC-MT	707	23.5333	0.969678
bPAC-MT	708	23.5667	0.967864
bPAC-MT	709	23.6	0.975316
bPAC-MT	710	23.6333	0.976696
bPAC-MT	711	23.6667	0.971492
bPAC-MT	712	23.7	0.971728
bPAC-MT	713	23.7333	0.968219
bPAC-MT	714	23.7667	0.96814
bPAC-MT	715	23.8	0.975947
bPAC-MT	716	23.8333	0.978629
bPAC-MT	717	23.8667	0.989906
bPAC-MT	718	23.9	0.997476
bPAC-MT	719	23.9333	0.993573
bPAC-MT	720	23.9667	1.02508
bPAC-MT	721	24	0.980127
bPAC-MT	722	24.0333	0.981941
bPAC-MT	723	24.0667	0.982769
bPAC-MT	724	24.1	0.97646
bPAC-MT	725	24.1333	0.96881
bPAC-MT	726	24.1667	0.96471
bPAC-MT	727	24.2	0.962738
bPAC-MT	728	24.2333	0.964867
bPAC-MT	729	24.2667	0.963172
bPAC-MT	730	24.3	0.965971
bPAC-MT	731	24.3333	0.962659
bPAC-MT	732	24.3667	0.962659
bPAC-MT	733	24.4	0.967549
bPAC-MT	734	24.4333	0.968022
bPAC-MT	735	24.4667	0.963881
bPAC-MT	736	24.5	0.968061
bPAC-MT	737	24.5333	0.963842
bPAC-MT	738	24.5667	0.96534
bPAC-MT	739	24.6	0.967746
bPAC-MT	740	24.6333	0.979259
bPAC-MT	741	24.6667	0.989157
bPAC-MT	742	24.7	0.993494
bPAC-MT	743	24.7333	1.00371
bPAC-MT	744	24.7667	1.01707
bPAC-MT	745	24.8	1.02382
bPAC-MT	746	24.8333	0.9931
bPAC-MT	747	24.8667	0.981389
bPAC-MT	748	24.9	0.979851
bPAC-MT	749	24.9333	0.97713
bPAC-MT	750	24.9667	0.972241
bPAC-MT	751	25	0.972438
bPAC-MT	752	25.0333	0.972911
bPAC-MT	753	25.0667	0.97504
bPAC-MT	754	25.1	0.979141
bPAC-MT	755	25.1333	0.985608
bPAC-MT	756	25.1667	0.979772
bPAC-MT	757	25.2	0.982453
bPAC-MT	758	25.2333	0.981507
bPAC-MT	759	25.2667	0.98265
bPAC-MT	760	25.3	0.97713
bPAC-MT	761	25.3333	0.980482
bPAC-MT	762	25.3667	0.973739
bPAC-MT	763	25.4	0.976381
bPAC-MT	764	25.4333	0.979259
bPAC-MT	765	25.4667	0.976775
bPAC-MT	766	25.5	0.974607
bPAC-MT	767	25.5333	0.975198
bPAC-MT	768	25.5667	0.975159
bPAC-MT	769	25.6	0.978274
bPAC-MT	770	25.6333	0.989314
bPAC-MT	771	25.6667	0.985805
bPAC-MT	772	25.7	0.987698
bPAC-MT	773	25.7333	0.984977
bPAC-MT	774	25.7667	0.990852
bPAC-MT	775	25.8	0.986672
bPAC-MT	776	25.8333	0.987658
bPAC-MT	777	25.8667	0.97642
bPAC-MT	778	25.9	0.978392
bPAC-MT	779	25.9333	0.976381
bPAC-MT	780	25.9667	0.978234
bPAC-MT	781	26	0.984385
bPAC-MT	782	26.0333	0.977761
bPAC-MT	783	26.0667	0.979062
bPAC-MT	784	26.1	0.97717
bPAC-MT	785	26.1333	0.976696
bPAC-MT	786	26.1667	0.975514
bPAC-MT	787	26.2	0.975001
bPAC-MT	788	26.2333	0.973739
bPAC-MT	789	26.2667	0.97993
bPAC-MT	790	26.3	0.976144
bPAC-MT	791	26.3333	0.980166
bPAC-MT	792	26.3667	0.988999
bPAC-MT	793	26.4	0.981034
bPAC-MT	794	26.4333	0.977682
bPAC-MT	795	26.4667	0.987776
bPAC-MT	796	26.5	0.980955
bPAC-MT	797	26.5333	0.987737
bPAC-MT	798	26.5667	0.987185
bPAC-MT	799	26.6	0.979457
bPAC-MT	800	26.6333	0.988447
bPAC-MT	801	26.6667	0.993021
bPAC-MT	802	26.7	0.997595
bPAC-MT	803	26.7333	0.995899
bPAC-MT	804	26.7667	0.986672
bPAC-MT	805	26.8	0.994992
bPAC-MT	806	26.8333	0.989709
bPAC-MT	807	26.8667	0.982729
bPAC-MT	808	26.9	0.988723
bPAC-MT	809	26.9333	0.987461
bPAC-MT	810	26.9667	0.982572
bPAC-MT	811	27	0.980048
bPAC-MT	812	27.0333	0.981192
bPAC-MT	813	27.0667	0.980679
bPAC-MT	814	27.1	0.981468
bPAC-MT	815	27.1333	0.983636
bPAC-MT	816	27.1667	0.987264
bPAC-MT	817	27.2	0.990813
bPAC-MT	818	27.2333	0.988052
bPAC-MT	819	27.2667	0.979062
bPAC-MT	820	27.3	0.986712
bPAC-MT	821	27.3333	0.985529
bPAC-MT	822	27.3667	0.989078
bPAC-MT	823	27.4	0.983715
bPAC-MT	824	27.4333	0.984543
bPAC-MT	825	27.4667	0.984543
bPAC-MT	826	27.5	0.98131
bPAC-MT	827	27.5333	0.986988
bPAC-MT	828	27.5667	0.984149
bPAC-MT	829	27.6	0.980561
bPAC-MT	830	27.6333	0.981034
bPAC-MT	831	27.6667	0.98198
bPAC-MT	832	27.7	0.979457
bPAC-MT	833	27.7333	0.979457
bPAC-MT	834	27.7667	0.978353
bPAC-MT	835	27.8	0.978983
bPAC-MT	836	27.8333	0.979259
bPAC-MT	837	27.8667	0.978944
bPAC-MT	838	27.9	0.979259
bPAC-MT	839	27.9333	0.978786
bPAC-MT	840	27.9667	0.988289
bPAC-MT	841	28	0.988762
bPAC-MT	842	28.0333	0.981349
bPAC-MT	843	28.0667	0.981901
bPAC-MT	844	28.1	0.981152
bPAC-MT	845	28.1333	0.982256
bPAC-MT	846	28.1667	0.984346
bPAC-MT	847	28.2	0.982453
bPAC-MT	848	28.2333	0.977879
bPAC-MT	849	28.2667	0.977682
bPAC-MT	850	28.3	0.974252
bPAC-MT	851	28.3333	0.973424
bPAC-MT	852	28.3667	0.975119
bPAC-MT	853	28.4	0.977643
bPAC-MT	854	28.4333	0.985766
bPAC-MT	855	28.4667	0.97579
bPAC-MT	856	28.5	0.982098
bPAC-MT	857	28.5333	0.975553
bPAC-MT	858	28.5667	0.978274
bPAC-MT	859	28.6	0.986594
bPAC-MT	860	28.6333	0.98131
bPAC-MT	861	28.6667	0.983991
bPAC-MT	862	28.7	0.981625
bPAC-MT	863	28.7333	0.978234
bPAC-MT	864	28.7667	0.976144
bPAC-MT	865	28.8	0.975356
bPAC-MT	866	28.8333	0.970821
bPAC-MT	867	28.8667	0.977446
bPAC-MT	868	28.9	0.981665
bPAC-MT	869	28.9333	0.975119
bPAC-MT	870	28.9667	0.976381
bPAC-MT	871	29	0.975119
bPAC-MT	872	29.0333	0.973187
bPAC-MT	873	29.0667	0.974212
bPAC-MT	874	29.1	0.973582
bPAC-MT	875	29.1333	0.981468
bPAC-MT	876	29.1667	0.981744
bPAC-MT	877	29.2	0.983518
bPAC-MT	878	29.2333	0.982493
bPAC-MT	879	29.2667	0.977327
bPAC-MT	880	29.3	0.982493
bPAC-MT	881	29.3333	0.975868
bPAC-MT	882	29.3667	0.980482
bPAC-MT	883	29.4	0.978905
bPAC-MT	884	29.4333	0.976223
bPAC-MT	885	29.4667	0.983518
bPAC-MT	886	29.5	0.980521
bPAC-MT	887	29.5333	0.977288
bPAC-MT	888	29.5667	0.973897
bPAC-MT	889	29.6	0.978826
bPAC-MT	890	29.6333	0.97646
bPAC-MT	891	29.6667	0.978313
bPAC-MT	892	29.7	0.980837
bPAC-MT	893	29.7333	0.979693
bPAC-MT	894	29.7667	0.978589
bPAC-MT	895	29.8	0.970821
bPAC-MT	896	29.8333	0.979338
bPAC-MT	897	29.8667	0.985805
bPAC-MT	898	29.9	0.980837
bPAC-MT	899	29.9333	0.983163
bPAC-MT	900	29.9667	0.981546
bPAC-MT	901	30	0.988644
bPAC-MT	902	30.0333	0.98474
bPAC-MT	903	30.0667	0.977446
bPAC-MT	904	30.1	0.973029
bPAC-MT	905	30.1333	0.973858
bPAC-MT	906	30.1667	0.976381
bPAC-MT	907	30.2	0.976263
bPAC-MT	908	30.2333	0.973266
bPAC-MT	909	30.2667	0.972083
bPAC-MT	910	30.3	0.973345
bPAC-MT	911	30.3333	0.971216
bPAC-MT	912	30.3667	0.969954
bPAC-MT	913	30.4	0.975908
bPAC-MT	914	30.4333	0.976263
bPAC-MT	915	30.4667	0.98127
bPAC-MT	916	30.5	0.9778
bPAC-MT	917	30.5333	0.978431
bPAC-MT	918	30.5667	0.981901
bPAC-MT	919	30.6	0.974488
bPAC-MT	920	30.6333	0.976066
bPAC-MT	921	30.6667	0.980955
bPAC-MT	922	30.7	0.982375
bPAC-MT	923	30.7333	0.980324
bPAC-MT	924	30.7667	0.974173
bPAC-MT	925	30.8	0.973069
bPAC-MT	926	30.8333	0.976696
bPAC-MT	927	30.8667	0.974962
bPAC-MT	928	30.9	0.977682
bPAC-MT	929	30.9333	0.969323
bPAC-MT	930	30.9667	0.970269
bPAC-MT	931	31	0.968534
bPAC-MT	932	31.0333	0.972832
bPAC-MT	933	31.0667	0.973424
bPAC-MT	934	31.1	0.973069
bPAC-MT	935	31.1333	0.971176
bPAC-MT	936	31.1667	0.973266
bPAC-MT	937	31.2	0.972477
bPAC-MT	938	31.2333	0.974686
bPAC-MT	939	31.2667	0.975514
bPAC-MT	940	31.3	0.975868
bPAC-MT	941	31.3333	0.973976
bPAC-MT	942	31.3667	0.973384
bPAC-MT	943	31.4	0.974607
bPAC-MT	944	31.4333	0.970585
bPAC-MT	945	31.4667	0.968771
bPAC-MT	946	31.5	0.966563
bPAC-MT	947	31.5333	0.967036
bPAC-MT	948	31.5667	0.977288
bPAC-MT	949	31.6	0.978392
bPAC-MT	950	31.6333	0.972438
bPAC-MT	951	31.6667	0.967864
bPAC-MT	952	31.7	0.975159
bPAC-MT	953	31.7333	0.975435
bPAC-MT	954	31.7667	0.973424
bPAC-MT	955	31.8	0.972714
bPAC-MT	956	31.8333	0.967864
bPAC-MT	957	31.8667	0.974488
bPAC-MT	958	31.9	0.971768
bPAC-MT	959	31.9333	0.976263
bPAC-MT	960	31.9667	0.976972
bPAC-MT	961	32	0.966168
bPAC-MT	962	32.0333	0.967351
bPAC-MT	963	32.0667	0.973503
bPAC-MT	964	32.1	0.973463
bPAC-MT	965	32.1333	0.973345
bPAC-MT	966	32.1667	0.97019
bPAC-MT	967	32.2	0.970112
bPAC-MT	968	32.2333	0.972477
bPAC-MT	969	32.2667	0.971571
bPAC-MT	970	32.3	0.977248
bPAC-MT	971	32.3333	0.970624
bPAC-MT	972	32.3667	0.96747
bPAC-MT	973	32.4	0.972083
bPAC-MT	974	32.4333	0.975356
bPAC-MT	975	32.4667	0.97019
bPAC-MT	976	32.5	0.973345
bPAC-MT	977	32.5333	0.971571
bPAC-MT	978	32.5667	0.962778
bPAC-MT	979	32.6	0.964867
bPAC-MT	980	32.6333	0.966444
bPAC-MT	981	32.6667	0.974134
bPAC-MT	982	32.7	0.973818
bPAC-MT	983	32.7333	0.968455
bPAC-MT	984	32.7667	0.971216
bPAC-MT	985	32.8	0.973108
bPAC-MT	986	32.8333	0.972872
bPAC-MT	987	32.8667	0.969836
bPAC-MT	988	32.9	0.971649
bPAC-MT	989	32.9333	0.972359
bPAC-MT	990	32.9667	0.974134
bPAC-MT	991	33	0.972872
bPAC-MT	992	33.0333	0.975159
bPAC-MT	993	33.0667	0.974922
bPAC-MT	994	33.1	0.969402
bPAC-MT	995	33.1333	0.970072
bPAC-MT	996	33.1667	0.972044
bPAC-MT	997	33.2	0.972399
bPAC-MT	998	33.2333	0.973029
bPAC-MT	999	33.2667	0.970821
bPAC-MT	1000	33.3	0.97232
bPAC-MT	1001	33.3333	0.972044
bPAC-MT	1002	33.3667	0.971846
bPAC-MT	1003	33.4	0.971846
bPAC-MT	1004	33.4333	0.969284
bPAC-MT	1005	33.4667	0.968455
bPAC-MT	1006	33.5	0.969796
bPAC-MT	1007	33.5333	0.969284
bPAC-MT	1008	33.5667	0.967943
bPAC-MT	1009	33.6	0.970821
bPAC-MT	1010	33.6333	0.97019
bPAC-MT	1011	33.6667	0.975238
bPAC-MT	1012	33.7	0.970979
bPAC-MT	1013	33.7333	0.968455
bPAC-MT	1014	33.7667	0.972872
bPAC-MT	1015	33.8	0.971294
bPAC-MT	1016	33.8333	0.974173
bPAC-MT	1017	33.8667	0.978195
bPAC-MT	1018	33.9	0.970427
bPAC-MT	1019	33.9333	0.972399
bPAC-MT	1020	33.9667	0.971925
bPAC-MT	1021	34	0.974055
bPAC-MT	1022	34.0333	0.969954
bPAC-MT	1023	34.0667	0.973108
bPAC-MT	1024	34.1	0.9709
bPAC-MT	1025	34.1333	0.9709
bPAC-MT	1026	34.1667	0.969954
bPAC-MT	1027	34.2	0.972162
bPAC-MT	1028	34.2333	0.976066
bPAC-MT	1029	34.2667	0.975671
bPAC-MT	1030	34.3	0.976302
bPAC-MT	1031	34.3333	0.976302
bPAC-MT	1032	34.3667	0.980087
bPAC-MT	1033	34.4	0.985332
bPAC-MT	1034	34.4333	0.984859
bPAC-MT	1035	34.4667	0.980403
bPAC-MT	1036	34.5	0.983794
bPAC-MT	1037	34.5333	0.977643
bPAC-MT	1038	34.5667	0.973384
bPAC-MT	1039	34.6	0.980087
bPAC-MT	1040	34.6333	0.976539
bPAC-MT	1041	34.6667	0.97646
bPAC-MT	1042	34.7	0.977722
bPAC-MT	1043	34.7333	0.973069
bPAC-MT	1044	34.7667	0.97232
bPAC-MT	1045	34.8	0.975356
bPAC-MT	1046	34.8333	0.97508
bPAC-MT	1047	34.8667	0.964552
bPAC-MT	1048	34.9	0.96329
bPAC-MT	1049	34.9333	0.966326
bPAC-MT	1050	34.9667	0.962778
bPAC-MT	1051	35	0.960845
bPAC-MT	1052	35.0333	0.977051
bPAC-MT	1053	35.0667	0.976499
bPAC-MT	1054	35.1	0.975159
bPAC-MT	1055	35.1333	0.978195
bPAC-MT	1056	35.1667	0.976972
bPAC-MT	1057	35.2	0.987225
bPAC-MT	1058	35.2333	0.989117
bPAC-MT	1059	35.2667	0.977958
bPAC-MT	1060	35.3	0.974291
bPAC-MT	1061	35.3333	0.974449
bPAC-MT	1062	35.3667	0.975395
bPAC-MT	1063	35.4	0.977012
bPAC-MT	1064	35.4333	0.975316
bPAC-MT	1065	35.4667	0.975198
bPAC-MT	1066	35.5	0.976933
bPAC-MT	1067	35.5333	0.979772
bPAC-MT	1068	35.5667	0.979772
bPAC-MT	1069	35.6	0.976933
bPAC-MT	1070	35.6333	0.977248
bPAC-MT	1071	35.6667	0.971097
bPAC-MT	1072	35.7	0.970782
bPAC-MT	1073	35.7333	0.971019
bPAC-MT	1074	35.7667	0.971728
bPAC-MT	1075	35.8	0.973542
bPAC-MT	1076	35.8333	0.97575
bPAC-MT	1077	35.8667	0.971886
bPAC-MT	1078	35.9	0.973463
bPAC-MT	1079	35.9333	0.97504
bPAC-MT	1080	35.9667	0.973858
bPAC-MT	1081	36	0.973858
bPAC-MT	1082	36.0333	0.97441
bPAC-MT	1083	36.0667	0.974094
bPAC-MT	1084	36.1	0.97575
bPAC-MT	1085	36.1333	0.977643
bPAC-MT	1086	36.1667	0.975671
bPAC-MT	1087	36.2	0.97504
bPAC-MT	1088	36.2333	0.977564
bPAC-MT	1089	36.2667	0.971886
bPAC-MT	1090	36.3	0.974883
bPAC-MT	1091	36.3333	0.976933
bPAC-MT	1092	36.3667	0.973936
bPAC-MT	1093	36.4	0.973305
bPAC-MT	1094	36.4333	0.97299
bPAC-MT	1095	36.4667	0.970466
bPAC-MT	1096	36.5	0.972399
bPAC-MT	1097	36.5333	0.970545
bPAC-MT	1098	36.5667	0.968653
bPAC-MT	1099	36.6	0.969126
bPAC-MT	1100	36.6333	0.971965
bPAC-MT	1101	36.6667	0.967825
bPAC-MT	1102	36.7	0.97094
bPAC-MT	1103	36.7333	0.96743
bPAC-MT	1104	36.7667	0.973779
bPAC-MT	1105	36.8	0.970506
bPAC-MT	1106	36.8333	0.972477
bPAC-MT	1107	36.8667	0.971728
bPAC-MT	1108	36.9	0.973976
bPAC-MT	1109	36.9333	0.973187
bPAC-MT	1110	36.9667	0.970033
bPAC-MT	1111	37	0.969954
bPAC-MT	1112	37.0333	0.970585
bPAC-MT	1113	37.0667	0.972596
bPAC-MT	1114	37.1	0.971649
bPAC-MT	1115	37.1333	0.970861
bPAC-MT	1116	37.1667	0.96676
bPAC-MT	1117	37.2	0.969836
bPAC-MT	1118	37.2333	0.971768
bPAC-MT	1119	37.2667	0.970269
bPAC-MT	1120	37.3	0.973227
bPAC-MT	1121	37.3333	0.972399
bPAC-MT	1122	37.3667	0.973345
bPAC-MT	1123	37.4	0.973069
bPAC-MT	1124	37.4333	0.973227
bPAC-MT	1125	37.4667	0.971807
bPAC-MT	1126	37.5	0.974686
bPAC-MT	1127	37.5333	0.969441
bPAC-MT	1128	37.5667	0.971649
bPAC-MT	1129	37.6	0.973542
bPAC-MT	1130	37.6333	0.974528
bPAC-MT	1131	37.6667	0.973345
bPAC-MT	1132	37.7	0.973976
bPAC-MT	1133	37.7333	0.973227
bPAC-MT	1134	37.7667	0.970861
bPAC-MT	1135	37.8	0.974055
bPAC-MT	1136	37.8333	0.972832
bPAC-MT	1137	37.8667	0.972359
bPAC-MT	1138	37.9	0.973069
bPAC-MT	1139	37.9333	0.975947
bPAC-MT	1140	37.9667	0.972004
bPAC-MT	1141	38	0.970269
bPAC-MT	1142	38.0333	0.967667
bPAC-MT	1143	38.0667	0.965853
bPAC-MT	1144	38.1	0.967903
bPAC-MT	1145	38.1333	0.967154
bPAC-MT	1146	38.1667	0.969323
bPAC-MT	1147	38.2	0.969954
bPAC-MT	1148	38.2333	0.968298
bPAC-MT	1149	38.2667	0.969402
bPAC-MT	1150	38.3	0.970033
bPAC-MT	1151	38.3333	0.967667
bPAC-MT	1152	38.3667	0.968298
bPAC-MT	1153	38.4	0.968298
bPAC-MT	1154	38.4333	0.965538
bPAC-MT	1155	38.4667	0.966721
bPAC-MT	1156	38.5	0.971097
bPAC-MT	1157	38.5333	0.972083
bPAC-MT	1158	38.5667	0.971452
bPAC-MT	1159	38.6	0.973187
bPAC-MT	1160	38.6333	0.972832
bPAC-MT	1161	38.6667	0.970624
bPAC-MT	1162	38.7	0.97508
bPAC-MT	1163	38.7333	0.973542
bPAC-MT	1164	38.7667	0.971373
bPAC-MT	1165	38.8	0.971137
bPAC-MT	1166	38.8333	0.972241
bPAC-MT	1167	38.8667	0.975711
bPAC-MT	1168	38.9	0.979023
bPAC-MT	1169	38.9333	0.974134
bPAC-MT	1170	38.9667	0.97366
bPAC-MT	1171	39	0.97366
bPAC-MT	1172	39.0333	0.970427
bPAC-MT	1173	39.0667	0.972951
bPAC-MT	1174	39.1	0.974134
bPAC-MT	1175	39.1333	0.976657
bPAC-MT	1176	39.1667	0.966799
bPAC-MT	1177	39.2	0.969008
bPAC-MT	1178	39.2333	0.970112
bPAC-MT	1179	39.2667	0.973187
bPAC-MT	1180	39.3	0.969638
bPAC-MT	1181	39.3333	0.970348
bPAC-MT	1182	39.3667	0.971925
bPAC-MT	1183	39.4	0.970348
bPAC-MT	1184	39.4333	0.970821
bPAC-MT	1185	39.4667	0.970821
bPAC-MT	1186	39.5	0.975553
bPAC-MT	1187	39.5333	0.972872
bPAC-MT	1188	39.5667	0.9737
bPAC-MT	1189	39.6	0.974922
bPAC-MT	1190	39.6333	0.974686
bPAC-MT	1191	39.6667	0.974055
bPAC-MT	1192	39.7	0.973108
bPAC-MT	1193	39.7333	0.970348
bPAC-MT	1194	39.7667	0.967903
bPAC-MT	1195	39.8	0.970112
bPAC-MT	1196	39.8333	0.971373
bPAC-MT	1197	39.8667	0.968219
bPAC-MT	1198	39.9	0.972517
bPAC-MT	1199	39.9333	0.970269
bPAC-MT	1200	39.9667	0.970112
bPAC-MT	1201	40	0.969402
bPAC-MT	1202	40.0333	0.972162
bPAC-MT	1203	40.0667	0.971846
bPAC-MT	1204	40.1	0.96952
bPAC-MT	1205	40.1333	0.971571
bPAC-MT	1206	40.1667	0.973029
bPAC-MT	1207	40.2	0.972162
bPAC-MT	1208	40.2333	0.968692
bPAC-MT	1209	40.2667	0.971216
bPAC-MT	1210	40.3	0.971216
bPAC-MT	1211	40.3333	0.971846
bPAC-MT	1212	40.3667	0.972556
bPAC-MT	1213	40.4	0.976736
bPAC-MT	1214	40.4333	0.974686
bPAC-MT	1215	40.4667	0.973384
bPAC-MT	1216	40.5	0.976105
bPAC-MT	1217	40.5333	0.975632
bPAC-MT	1218	40.5667	0.975632
bPAC-MT	1219	40.6	0.975632
bPAC-MT	1220	40.6333	0.976894
bPAC-MT	1221	40.6667	0.978155
bPAC-MT	1222	40.7	0.97922
bPAC-MT	1223	40.7333	0.977406
bPAC-MT	1224	40.7667	0.977998
bPAC-MT	1225	40.8	0.972399
bPAC-MT	1226	40.8333	0.972399
bPAC-MT	1227	40.8667	0.971807
bPAC-MT	1228	40.9	0.972753
bPAC-MT	1229	40.9333	0.972399
bPAC-MT	1230	40.9667	0.96952
bPAC-MT	1231	41	0.972753
bPAC-MT	1232	41.0333	0.972438
bPAC-MT	1233	41.0667	0.970861
bPAC-MT	1234	41.1	0.970545
bPAC-MT	1235	41.1333	0.964907
bPAC-MT	1236	41.1667	0.967746
bPAC-MT	1237	41.2	0.962896
bPAC-MT	1238	41.2333	0.964473
bPAC-MT	1239	41.2667	0.964867
bPAC-MT	1240	41.3	0.964788
bPAC-MT	1241	41.3333	0.962226
bPAC-MT	1242	41.3667	0.964118
bPAC-MT	1243	41.4	0.967982
bPAC-MT	1244	41.4333	0.967509
bPAC-MT	1245	41.4667	0.961595
bPAC-MT	1246	41.5	0.965419
bPAC-MT	1247	41.5333	0.964355
bPAC-MT	1248	41.5667	0.974134
bPAC-MT	1249	41.6	0.96956
bPAC-MT	1250	41.6333	0.969914
bPAC-MT	1251	41.6667	0.970506
bPAC-MT	1252	41.7	0.975908
bPAC-MT	1253	41.7333	0.973858
bPAC-MT	1254	41.7667	0.974804
bPAC-MT	1255	41.8	0.983163
bPAC-MT	1256	41.8333	0.979259
bPAC-MT	1257	41.8667	0.978786
bPAC-MT	1258	41.9	0.974843
bPAC-MT	1259	41.9333	0.97579
bPAC-MT	1260	41.9667	0.975316
bPAC-MT	1261	42	0.972004
bPAC-MT	1262	42.0333	0.969836
bPAC-MT	1263	42.0667	0.973148
bPAC-MT	1264	42.1	0.974015
bPAC-MT	1265	42.1333	0.973779
bPAC-MT	1266	42.1667	0.97504
bPAC-MT	1267	42.2	0.975829
bPAC-MT	1268	42.2333	0.976144
bPAC-MT	1269	42.2667	0.980245
bPAC-MT	1270	42.3	0.97717
bPAC-MT	1271	42.3333	0.977879
bPAC-MT	1272	42.3667	0.979299
bPAC-MT	1273	42.4	0.976775
bPAC-MT	1274	42.4333	0.976815
bPAC-MT	1275	42.4667	0.972201
bPAC-MT	1276	42.5	0.976302
bPAC-MT	1277	42.5333	0.977248
bPAC-MT	1278	42.5667	0.97441
bPAC-MT	1279	42.6	0.972832
bPAC-MT	1280	42.6333	0.972832
bPAC-MT	1281	42.6667	0.975908
bPAC-MT	1282	42.7	0.971492
bPAC-MT	1283	42.7333	0.971807
bPAC-MT	1284	42.7667	0.974015
bPAC-MT	1285	42.8	0.971965
bPAC-MT	1286	42.8333	0.971965
bPAC-MT	1287	42.8667	0.978983
bPAC-MT	1288	42.9	0.973463
bPAC-MT	1289	42.9333	0.976302
bPAC-MT	1290	42.9667	0.974725
bPAC-MT	1291	43	0.977879
bPAC-MT	1292	43.0333	0.976933
bPAC-MT	1293	43.0667	0.97441
bPAC-MT	1294	43.1	0.976223
bPAC-MT	1295	43.1333	0.974607
bPAC-MT	1296	43.1667	0.974607
bPAC-MT	1297	43.2	0.976223
bPAC-MT	1298	43.2333	0.974015
bPAC-MT	1299	43.2667	0.980876
bPAC-MT	1300	43.3	0.971886
bPAC-MT	1301	43.3333	0.973108
bPAC-MT	1302	43.3667	0.97094
bPAC-MT	1303	43.4	0.974331
bPAC-MT	1304	43.4333	0.969362
bPAC-MT	1305	43.4667	0.97441
bPAC-MT	1306	43.5	0.975592
bPAC-MT	1307	43.5333	0.975592
bPAC-MT	1308	43.5667	0.983794
bPAC-MT	1309	43.6	0.980009
bPAC-MT	1310	43.6333	0.979062
bPAC-MT	1311	43.6667	0.980009
bPAC-MT	1312	43.7	0.982532
bPAC-MT	1313	43.7333	0.980639
bPAC-MT	1314	43.7667	0.974094
bPAC-MT	1315	43.8	0.976302
bPAC-MT	1316	43.8333	0.976302
bPAC-MT	1317	43.8667	0.972832
bPAC-MT	1318	43.9	0.973739
bPAC-MT	1319	43.9333	0.975592
bPAC-MT	1320	43.9667	0.975592
bPAC-MT	1321	44	0.98127
bPAC-MT	1322	44.0333	0.979693
bPAC-MT	1323	44.0667	0.98127
bPAC-MT	1324	44.1	0.978431
bPAC-MT	1325	44.1333	0.984385
bPAC-MT	1326	44.1667	0.983439
bPAC-MT	1327	44.2	0.980127
bPAC-MT	1328	44.2333	0.972556
bPAC-MT	1329	44.2667	0.970703
bPAC-MT	1330	44.3	0.970821
bPAC-MT	1331	44.3333	0.968061
bPAC-MT	1332	44.3667	0.96743
bPAC-MT	1333	44.4	0.969481
bPAC-MT	1334	44.4333	0.970112
bPAC-MT	1335	44.4667	0.970585
bPAC-MT	1336	44.5	0.970585
bPAC-MT	1337	44.5333	0.970112
bPAC-MT	1338	44.5667	0.971689
bPAC-MT	1339	44.6	0.974134
bPAC-MT	1340	44.6333	0.9737
bPAC-MT	1341	44.6667	0.973108
bPAC-MT	1342	44.7	0.982532
bPAC-MT	1343	44.7333	0.973542
bPAC-MT	1344	44.7667	0.97717
bPAC-MT	1345	44.8	0.979812
bPAC-MT	1346	44.8333	0.980324
bPAC-MT	1347	44.8667	0.980442
bPAC-MT	1348	44.9	0.98127
bPAC-MT	1349	44.9333	0.98127
bPAC-MT	1350	44.9667	0.981073
bPAC-MT	1351	45	0.980955
bPAC-MT	1352	45.0333	0.978589
bPAC-MT	1353	45.0667	0.968771
bPAC-MT	1354	45.1	0.981231
bPAC-MT	1355	45.1333	0.981704
bPAC-MT	1356	45.1667	0.977919
bPAC-MT	1357	45.2	0.971294
bPAC-MT	1358	45.2333	0.970979
bPAC-MT	1359	45.2667	0.970348
bPAC-MT	1360	45.3	0.975238
bPAC-MT	1361	45.3333	0.981862
bPAC-MT	1362	45.3667	0.975908
bPAC-MT	1363	45.4	0.97437
bPAC-MT	1364	45.4333	0.972714
bPAC-MT	1365	45.4667	0.974252
bPAC-MT	1366	45.5	0.98127
bPAC-MT	1367	45.5333	0.982217
bPAC-MT	1368	45.5667	0.979969
bPAC-MT	1369	45.6	0.973976
bPAC-MT	1370	45.6333	0.975277
bPAC-MT	1371	45.6667	0.972399
bPAC-MT	1372	45.7	0.983163
bPAC-MT	1373	45.7333	0.980916
bPAC-MT	1374	45.7667	0.97713
bPAC-MT	1375	45.8	0.979772
bPAC-MT	1376	45.8333	0.979141
bPAC-MT	1377	45.8667	0.982572
bPAC-MT	1378	45.9	0.971255
bPAC-MT	1379	45.9333	0.976815
bPAC-MT	1380	45.9667	0.973582
bPAC-MT	1381	46	0.970427
bPAC-MT	1382	46.0333	0.976105
bPAC-MT	1383	46.0667	0.975395
bPAC-MT	1384	46.1	0.978905
bPAC-MT	1385	46.1333	0.978431
bPAC-MT	1386	46.1667	0.980955
bPAC-MT	1387	46.2	0.976499
bPAC-MT	1388	46.2333	0.978707
bPAC-MT	1389	46.2667	0.979851
bPAC-MT	1390	46.3	0.982848
bPAC-MT	1391	46.3333	0.982808
bPAC-MT	1392	46.3667	0.974173
bPAC-MT	1393	46.4	0.978747
bPAC-MT	1394	46.4333	0.970742
bPAC-MT	1395	46.4667	0.974488
bPAC-MT	1396	46.5	0.97366
bPAC-MT	1397	46.5333	0.978905
bPAC-MT	1398	46.5667	0.981468
bPAC-MT	1399	46.6	0.972675
bPAC-MT	1400	46.6333	0.977643
bPAC-MT	1401	46.6667	0.980639
bPAC-MT	1402	46.7	0.981113
bPAC-MT	1403	46.7333	0.978392
bPAC-MT	1404	46.7667	0.978392
bPAC-MT	1405	46.8	0.978392
bPAC-MT	1406	46.8333	0.977761
bPAC-MT	1407	46.8667	0.981586
bPAC-MT	1408	46.9	0.981744
bPAC-MT	1409	46.9333	0.984228
bPAC-MT	1410	46.9667	0.982966
bPAC-MT	1411	47	0.973503
bPAC-MT	1412	47.0333	0.969599
bPAC-MT	1413	47.0667	0.9709
bPAC-MT	1414	47.1	0.975592
bPAC-MT	1415	47.1333	0.974015
bPAC-MT	1416	47.1667	0.969914
bPAC-MT	1417	47.2	0.969993
bPAC-MT	1418	47.2333	0.967115
bPAC-MT	1419	47.2667	0.97023
bPAC-MT	1420	47.3	0.969599
bPAC-MT	1421	47.3333	0.969717
bPAC-MT	1422	47.3667	0.974567
bPAC-MT	1423	47.4	0.976854
bPAC-MT	1424	47.4333	0.975592
bPAC-MT	1425	47.4667	0.9737
bPAC-MT	1426	47.5	0.976381
bPAC-MT	1427	47.5333	0.974804
bPAC-MT	1428	47.5667	0.972911
bPAC-MT	1429	47.6	0.969599
bPAC-MT	1430	47.6333	0.970545
bPAC-MT	1431	47.6667	0.969284
bPAC-MT	1432	47.7	0.970861
bPAC-MT	1433	47.7333	0.981507
bPAC-MT	1434	47.7667	0.979141
bPAC-MT	1435	47.8	0.979141
bPAC-MT	1436	47.8333	0.9737
bPAC-MT	1437	47.8667	0.978116
bPAC-MT	1438	47.9	0.973227
bPAC-MT	1439	47.9333	0.973227
bPAC-MT	1440	47.9667	0.978116
bPAC-MT	1441	48	0.978116
bPAC-MT	1442	48.0333	0.973029
bPAC-MT	1443	48.0667	0.973858
bPAC-MT	1444	48.1	0.976854
bPAC-MT	1445	48.1333	0.980955
bPAC-MT	1446	48.1667	0.976933
bPAC-MT	1447	48.2	0.975987
bPAC-MT	1448	48.2333	0.97851
bPAC-MT	1449	48.2667	0.979457
bPAC-MT	1450	48.3	0.976854
bPAC-MT	1451	48.3333	0.969914
bPAC-MT	1452	48.3667	0.971176
bPAC-MT	1453	48.4	0.978905
bPAC-MT	1454	48.4333	0.97922
bPAC-MT	1455	48.4667	0.979378
bPAC-MT	1456	48.5	0.981034
bPAC-MT	1457	48.5333	0.976263
bPAC-MT	1458	48.5667	0.971531
bPAC-MT	1459	48.6	0.973384
bPAC-MT	1460	48.6333	0.980206
bPAC-MT	1461	48.6667	0.976854
bPAC-MT	1462	48.7	0.973345
bPAC-MT	1463	48.7333	0.975671
bPAC-MT	1464	48.7667	0.976381
bPAC-MT	1465	48.8	0.976381
bPAC-MT	1466	48.8333	0.968337
bPAC-MT	1467	48.8667	0.979378
bPAC-MT	1468	48.9	0.981665
bPAC-MT	1469	48.9333	0.979772
bPAC-MT	1470	48.9667	0.982296
bPAC-MT	1471	49	0.981586
bPAC-MT	1472	49.0333	0.983952
bPAC-MT	1473	49.0667	0.977761
bPAC-MT	1474	49.1	0.983439
bPAC-MT	1475	49.1333	0.987027
bPAC-MT	1476	49.1667	0.983005
bPAC-MT	1477	49.2	0.975908
bPAC-MT	1478	49.2333	0.972596
bPAC-MT	1479	49.2667	0.975435
bPAC-MT	1480	49.3	0.976105
bPAC-MT	1481	49.3333	0.973266
bPAC-MT	1482	49.3667	0.975947
bPAC-MT	1483	49.4	0.978589
bPAC-MT	1484	49.4333	0.978589
bPAC-MT	1485	49.4667	0.977327
bPAC-MT	1486	49.5	0.976854
bPAC-MT	1487	49.5333	0.976854
bPAC-MT	1488	49.5667	0.976854
bPAC-MT	1489	49.6	0.976854
bPAC-MT	1490	49.6333	0.976854
bPAC-MT	1491	49.6667	0.975277
bPAC-MT	1492	49.7	0.975277
bPAC-MT	1493	49.7333	0.976696
bPAC-MT	1494	49.7667	0.979693
bPAC-MT	1495	49.8	0.971649
bPAC-MT	1496	49.8333	0.972596
bPAC-MT	1497	49.8667	0.972911
bPAC-MT	1498	49.9	0.980166
bPAC-MT	1499	49.9333	0.979535
bPAC-MT	1500	49.9667	0.973266
bPAC-MT	1501	50	0.973897
bPAC-MT	1502	50.0333	0.980955

## Sheet: C
Line	Time (ms)	X	Y
bPAC-MT	500	-9.5	0.97561
bPAC-MT	600	-9.4	0.731707
bPAC-MT	700	-9.3	0.731707
bPAC-MT	800	-9.2	0.97561
bPAC-MT	900	-9.1	0.97561
bPAC-MT	1000	-9	1.21951
bPAC-MT	1100	-8.9	0.97561
bPAC-MT	1200	-8.8	1.21951
bPAC-MT	1300	-8.7	0.97561
bPAC-MT	1400	-8.6	0.97561
bPAC-MT	1500	-8.5	0.97561
bPAC-MT	1600	-8.4	0.97561
bPAC-MT	1700	-8.3	1.21951
bPAC-MT	1800	-8.2	0.97561
bPAC-MT	1900	-8.1	0.97561
bPAC-MT	2000	-8	0.97561
bPAC-MT	2100	-7.9	0.97561
bPAC-MT	2200	-7.8	0.97561
bPAC-MT	2300	-7.7	0.97561
bPAC-MT	2400	-7.6	1.21951
bPAC-MT	2500	-7.5	0.97561
bPAC-MT	2600	-7.4	0.97561
bPAC-MT	2700	-7.3	0.97561
bPAC-MT	2800	-7.2	0.97561
bPAC-MT	2900	-7.1	1.21951
bPAC-MT	3000	-7	0.97561
bPAC-MT	3100	-6.9	1.21951
bPAC-MT	3200	-6.8	0.97561
bPAC-MT	3300	-6.7	0.97561
bPAC-MT	3400	-6.6	0.97561
bPAC-MT	3500	-6.5	0.97561
bPAC-MT	3600	-6.4	1.21951
bPAC-MT	3700	-6.3	0.97561
bPAC-MT	3800	-6.2	0.97561
bPAC-MT	3900	-6.1	0.97561
bPAC-MT	4000	-6	0.97561
bPAC-MT	4100	-5.9	0.97561
bPAC-MT	4200	-5.8	0.97561
bPAC-MT	4300	-5.7	1.21951
bPAC-MT	4400	-5.6	0.97561
bPAC-MT	4500	-5.5	0.97561
bPAC-MT	4600	-5.4	0.97561
bPAC-MT	4700	-5.3	0.97561
bPAC-MT	4800	-5.2	1.21951
bPAC-MT	4900	-5.1	0.97561
bPAC-MT	5000	-5	0.97561
bPAC-MT	5100	-4.9	0.97561
bPAC-MT	5200	-4.8	0.97561
bPAC-MT	5300	-4.7	0.97561
bPAC-MT	5400	-4.6	0.97561
bPAC-MT	5500	-4.5	1.21951
bPAC-MT	5600	-4.4	0.97561
bPAC-MT	5700	-4.3	0.97561
bPAC-MT	5800	-4.2	0.97561
bPAC-MT	5900	-4.1	0.97561
bPAC-MT	6000	-4	1.21951
bPAC-MT	6100	-3.9	0.97561
bPAC-MT	6200	-3.8	0.97561
bPAC-MT	6300	-3.7	0.97561
bPAC-MT	6400	-3.6	0.97561
bPAC-MT	6500	-3.5	0.97561
bPAC-MT	6600	-3.4	0.97561
bPAC-MT	6700	-3.3	1.21951
bPAC-MT	6800	-3.2	0.97561
bPAC-MT	6900	-3.1	1.21951
bPAC-MT	7000	-3	0.97561
bPAC-MT	7100	-2.9	0.97561
bPAC-MT	7200	-2.8	1.21951
bPAC-MT	7300	-2.7	0.97561
bPAC-MT	7400	-2.6	1.21951
bPAC-MT	7500	-2.5	0.97561
bPAC-MT	7600	-2.4	0.97561
bPAC-MT	7700	-2.3	0.97561
bPAC-MT	7800	-2.2	0.97561
bPAC-MT	7900	-2.1	0.97561
bPAC-MT	8000	-2	0.97561
bPAC-MT	8100	-1.9	0.97561
bPAC-MT	8200	-1.8	0.97561
bPAC-MT	8300	-1.7	0.97561
bPAC-MT	8400	-1.6	0.97561
bPAC-MT	8500	-1.5	0.97561
bPAC-MT	8600	-1.4	1.21951
bPAC-MT	8700	-1.3	0.97561
bPAC-MT	8800	-1.2	0.97561
bPAC-MT	8900	-1.1	0.97561
bPAC-MT	9000	-1	0.97561
bPAC-MT	9100	-0.9	1.21951
bPAC-MT	9200	-0.8	0.97561
bPAC-MT	9300	-0.7	1.21951
bPAC-MT	9400	-0.6	0.97561
bPAC-MT	9500	-0.5	0.97561
bPAC-MT	9600	-0.4	0.97561
bPAC-MT	9700	-0.3	0.97561
bPAC-MT	9800	-0.2	1.21951
bPAC-MT	9900	-0.1	0.97561
bPAC-MT	10000	0	1.21951
bPAC-MT	10100	0.1	0.97561
bPAC-MT	10200	0.2	0.97561
bPAC-MT	10300	0.3	0.97561
bPAC-MT	10400	0.4	0.97561
bPAC-MT	10500	0.5	1.21951
bPAC-MT	10600	0.6	0.97561
bPAC-MT	10700	0.7	1.21951
bPAC-MT	10800	0.8	0.97561
bPAC-MT	10900	0.9	0.97561
bPAC-MT	11000	1	0.97561
bPAC-MT	11100	1.1	0.97561
bPAC-MT	11200	1.2	1.21951
bPAC-MT	11300	1.3	0.97561
bPAC-MT	11400	1.4	0.97561
bPAC-MT	11500	1.5	0.97561
bPAC-MT	11600	1.6	0.97561
bPAC-MT	11700	1.7	0.97561
bPAC-MT	11800	1.8	0.97561
bPAC-MT	11900	1.9	1.21951
bPAC-MT	12000	2	0.97561
bPAC-MT	12100	2.1	0.97561
bPAC-MT	12200	2.2	0.97561
bPAC-MT	12300	2.3	0.97561
bPAC-MT	12400	2.4	1.21951
bPAC-MT	12500	2.5	0.97561
bPAC-MT	12600	2.6	0.97561
bPAC-MT	12700	2.7	0.97561
bPAC-MT	12800	2.8	0.97561
bPAC-MT	12900	2.9	0.97561
bPAC-MT	13000	3	0.97561
bPAC-MT	13100	3.1	0.97561
bPAC-MT	13200	3.2	0.97561
bPAC-MT	13300	3.3	0.97561
bPAC-MT	13400	3.4	0.97561
bPAC-MT	13500	3.5	0.97561
bPAC-MT	13600	3.6	1.21951
bPAC-MT	13700	3.7	0.97561
bPAC-MT	13800	3.8	0.97561
bPAC-MT	13900	3.9	0.97561
bPAC-MT	14000	4	0.97561
bPAC-MT	14100	4.1	1.21951
bPAC-MT	14200	4.2	0.97561
bPAC-MT	14300	4.3	0.97561
bPAC-MT	14400	4.4	0.97561
bPAC-MT	14500	4.5	0.97561
bPAC-MT	14600	4.6	0.731707
bPAC-MT	14700	4.7	0.97561
bPAC-MT	14800	4.8	0.97561
bPAC-MT	14900	4.9	0.97561
bPAC-MT	15000	5	0.97561
bPAC-MT	15100	5.1	0.97561
bPAC-MT	15200	5.2	0.97561
bPAC-MT	15300	5.3	0.97561
bPAC-MT	15400	5.4	0.97561
bPAC-MT	15700	5.7	0.97561
bPAC-MT	15800	5.8	0.97561
bPAC-MT	15900	5.9	0.97561
bPAC-MT	16000	6	0.97561
bPAC-MT	16100	6.1	0.731707
bPAC-MT	16200	6.2	0.97561
bPAC-MT	16300	6.3	0.97561
bPAC-MT	16400	6.4	0.97561
bPAC-MT	16500	6.5	0.97561
bPAC-MT	16600	6.6	0.97561
bPAC-MT	16700	6.7	0.97561
bPAC-MT	16800	6.8	0.97561
bPAC-MT	16900	6.9	0.97561
bPAC-MT	17000	7	0.97561
bPAC-MT	17100	7.1	0.97561
bPAC-MT	17200	7.2	0.97561
bPAC-MT	17300	7.3	0.97561
bPAC-MT	17400	7.4	0.97561
bPAC-MT	17500	7.5	0.97561
bPAC-MT	17600	7.6	0.97561
bPAC-MT	17700	7.7	0.97561
bPAC-MT	17800	7.8	0.97561
bPAC-MT	17900	7.9	0.731707
bPAC-MT	18000	8	0.97561
bPAC-MT	18100	8.1	0.97561
bPAC-MT	18200	8.2	0.97561
bPAC-MT	18300	8.3	0.97561
bPAC-MT	18400	8.4	0.731707
bPAC-MT	18500	8.5	0.97561
bPAC-MT	18600	8.6	0.97561
bPAC-MT	18700	8.7	0.97561
bPAC-MT	18800	8.8	0.97561
bPAC-MT	18900	8.9	0.97561
bPAC-MT	19000	9	0.97561
bPAC-MT	19100	9.1	0.97561
bPAC-MT	19200	9.2	0.731707
bPAC-MT	19300	9.3	0.97561
bPAC-MT	19400	9.4	0.97561
bPAC-MT	19500	9.5	0.97561
bPAC-MT	19600	9.6	0.97561
bPAC-MT	19700	9.7	0.97561
bPAC-MT	19800	9.8	0.97561
bPAC-MT	19900	9.9	0.97561
bPAC-MT	20000	10	0.97561
bPAC-MT	20100	10.1	0.97561
bPAC-MT	20200	10.2	0.97561
bPAC-MT	20300	10.3	0.97561
bPAC-MT	20400	10.4	0.97561
bPAC-MT	20500	10.5	0.97561
bPAC-MT	20600	10.6	0.97561
bPAC-MT	20700	10.7	0.731707
bPAC-MT	20800	10.8	0.97561
bPAC-MT	20900	10.9	0.97561
bPAC-MT	21000	11	0.97561
bPAC-MT	21100	11.1	0.97561
bPAC-MT	21200	11.2	0.97561
bPAC-MT	21300	11.3	0.97561
bPAC-MT	21400	11.4	0.97561
bPAC-MT	21500	11.5	0.97561
bPAC-MT	21600	11.6	0.97561
bPAC-MT	21700	11.7	0.97561
bPAC-MT	21800	11.8	0.97561
bPAC-MT	21900	11.9	0.97561
bPAC-MT	22000	12	0.97561
bPAC-MT	22100	12.1	0.97561
bPAC-MT	22200	12.2	0.97561
bPAC-MT	22300	12.3	0.97561
bPAC-MT	22400	12.4	0.97561
bPAC-MT	22500	12.5	0.97561
bPAC-MT	22600	12.6	0.97561
bPAC-MT	22700	12.7	0.97561
bPAC-MT	22800	12.8	0.97561
bPAC-MT	22900	12.9	0.97561
bPAC-MT	23000	13	0.731707
bPAC-MT	23100	13.1	0.97561
bPAC-MT	23200	13.2	0.97561
bPAC-MT	23300	13.3	0.97561
bPAC-MT	23400	13.4	0.97561
bPAC-MT	23500	13.5	0.731707
bPAC-MT	23600	13.6	0.97561
bPAC-MT	23700	13.7	0.97561
bPAC-MT	23800	13.8	0.97561
bPAC-MT	23900	13.9	0.97561
bPAC-MT	24000	14	0.97561
bPAC-MT	24100	14.1	0.97561
bPAC-MT	24200	14.2	0.97561
bPAC-MT	24300	14.3	0.97561
bPAC-MT	24400	14.4	0.97561
bPAC-MT	24500	14.5	0.97561
bPAC-MT	24600	14.6	0.97561
bPAC-MT	24700	14.7	0.97561
bPAC-MT	24800	14.8	0.731707
bPAC-MT	24900	14.9	0.97561
bPAC-MT	25000	15	0.97561
bPAC-MT	25100	15.1	0.97561
bPAC-MT	25200	15.2	0.97561
bPAC-MT	25300	15.3	0.731707
bPAC-MT	25400	15.4	0.97561
bPAC-MT	25500	15.5	0.97561
bPAC-MT	25600	15.6	0.97561
bPAC-MT	25700	15.7	0.97561
bPAC-MT	25800	15.8	0.97561
bPAC-MT	25900	15.9	0.97561
bPAC-MT	26000	16	0.97561
bPAC-MT	26100	16.1	0.97561
bPAC-MT	26200	16.2	0.97561
bPAC-MT	26300	16.3	0.97561
bPAC-MT	26400	16.4	0.97561
bPAC-MT	26500	16.5	0.97561
bPAC-MT	26600	16.6	0.731707
bPAC-MT	26700	16.7	0.97561
bPAC-MT	26800	16.8	0.97561
bPAC-MT	26900	16.9	0.731707
bPAC-MT	27000	17	0.97561
bPAC-MT	27100	17.1	0.731707
bPAC-MT	27200	17.2	0.97561
bPAC-MT	27300	17.3	0.97561
bPAC-MT	27400	17.4	0.731707
bPAC-MT	27500	17.5	0.97561
bPAC-MT	27600	17.6	0.97561
bPAC-MT	27700	17.7	0.97561
bPAC-MT	27800	17.8	0.97561
bPAC-MT	27900	17.9	0.97561
bPAC-MT	28000	18	0.97561
bPAC-MT	28100	18.1	0.97561
bPAC-MT	28200	18.2	0.731707
bPAC-MT	28300	18.3	0.97561
bPAC-MT	28400	18.4	0.97561
bPAC-MT	28500	18.5	0.97561
bPAC-MT	28600	18.6	0.97561
bPAC-MT	28700	18.7	0.731707
bPAC-MT	28800	18.8	0.97561
bPAC-MT	28900	18.9	0.97561
bPAC-MT	29000	19	0.731707
bPAC-MT	29100	19.1	0.97561
bPAC-MT	29200	19.2	0.97561
bPAC-MT	29300	19.3	0.97561
bPAC-MT	29400	19.4	0.97561
bPAC-MT	29500	19.5	0.731707
bPAC-MT	29600	19.6	0.97561
bPAC-MT	29700	19.7	0.97561
bPAC-MT	29800	19.8	0.731707
bPAC-MT	29900	19.9	0.97561
bPAC-MT	30000	20	0.97561
bPAC-MT	30100	20.1	0.97561
bPAC-MT	30200	20.2	0.97561
bPAC-MT	30300	20.3	0.731707
bPAC-MT	30400	20.4	0.97561
bPAC-MT	30500	20.5	0.97561
bPAC-MT	30600	20.6	0.731707
bPAC-MT	30700	20.7	0.97561
bPAC-MT	30800	20.8	0.97561
bPAC-MT	30900	20.9	0.731707
bPAC-MT	31000	21	0.97561
bPAC-MT	31100	21.1	0.731707
bPAC-MT	31200	21.2	0.97561
bPAC-MT	31300	21.3	0.97561
bPAC-MT	31400	21.4	0.731707
bPAC-MT	31500	21.5	0.97561
bPAC-MT	31600	21.6	0.97561
bPAC-MT	31700	21.7	0.731707
bPAC-MT	31800	21.8	0.97561
bPAC-MT	31900	21.9	0.97561
bPAC-MT	32000	22	0.731707
bPAC-MT	32100	22.1	0.97561
bPAC-MT	32200	22.2	0.731707
bPAC-MT	32300	22.3	0.731707
bPAC-MT	32400	22.4	0.97561
bPAC-MT	32500	22.5	0.731707
bPAC-MT	32600	22.6	0.97561
bPAC-MT	32700	22.7	0.97561
bPAC-MT	32800	22.8	0.731707
bPAC-MT	32900	22.9	0.97561
bPAC-MT	33000	23	0.97561
bPAC-MT	33100	23.1	0.731707
bPAC-MT	33200	23.2	0.97561
bPAC-MT	33300	23.3	0.97561
bPAC-MT	33400	23.4	0.731707
bPAC-MT	33500	23.5	0.97561
bPAC-MT	33600	23.6	0.731707
bPAC-MT	33700	23.7	0.731707
bPAC-MT	33800	23.8	0.97561
bPAC-MT	33900	23.9	0.731707
bPAC-MT	34000	24	0.731707
bPAC-MT	34100	24.1	0.97561
bPAC-MT	34200	24.2	0.731707
bPAC-MT	34300	24.3	0.731707
bPAC-MT	34400	24.4	0.97561
bPAC-MT	34500	24.5	0.731707
bPAC-MT	34600	24.6	0.731707
bPAC-MT	34700	24.7	0.97561
bPAC-MT	34800	24.8	0.731707
bPAC-MT	34900	24.9	0.731707
bPAC-MT	35000	25	0.97561
bPAC-MT	35100	25.1	0.731707
bPAC-MT	35200	25.2	0.731707
bPAC-MT	35300	25.3	0.97561
bPAC-MT	35400	25.4	0.731707
bPAC-MT	35500	25.5	0.731707
bPAC-MT	35600	25.6	0.97561
bPAC-MT	35700	25.7	0.731707
bPAC-MT	35800	25.8	0.731707
bPAC-MT	35900	25.9	0.97561
bPAC-MT	36000	26	0.731707
bPAC-MT	36100	26.1	0.731707
bPAC-MT	36200	26.2	0.97561
bPAC-MT	36300	26.3	0.731707
bPAC-MT	36400	26.4	0.731707
bPAC-MT	36500	26.5	0.731707
bPAC-MT	36600	26.6	0.731707
bPAC-MT	36700	26.7	0.731707
bPAC-MT	36800	26.8	0.731707
bPAC-MT	36900	26.9	0.731707
bPAC-MT	37000	27	0.731707
bPAC-MT	37100	27.1	0.731707
bPAC-MT	37200	27.2	0.731707
bPAC-MT	37300	27.3	0.731707
bPAC-MT	37400	27.4	0.731707
bPAC-MT	37500	27.5	0.731707
bPAC-MT	37600	27.6	0.731707
bPAC-MT	37700	27.7	0.731707
bPAC-MT	37800	27.8	0.731707
bPAC-MT	37900	27.9	0.731707
bPAC-MT	38000	28	0.731707
bPAC-MT	38100	28.1	0.731707
bPAC-MT	38200	28.2	0.487805
bPAC-MT	38300	28.3	0.731707
bPAC-MT	38400	28.4	0.731707
bPAC-MT	38500	28.5	0.731707
bPAC-MT	38600	28.6	0.487805
bPAC-MT	38700	28.7	0.731707
bPAC-MT	38800	28.8	0.731707
bPAC-MT	38900	28.9	0.487805
bPAC-MT	39000	29	0.487805
bPAC-MT	39100	29.1	0.731707
bPAC-MT	39200	29.2	0.731707
bPAC-MT	39300	29.3	0.487805
bPAC-MT	39400	29.4	0.487805
bPAC-MT	39500	29.5	0.487805
bPAC-MT	39600	29.6	0.487805
bPAC-MT	39700	29.7	0.487805
bPAC-MT	39800	29.8	0.487805
bPAC-MT	39900	29.9	0.487805
bPAC-MT	40000	30	0.731707
bPAC-MT	40100	30.1	0.487805
bPAC-MT	40200	30.2	0.487805
bPAC-MT	40300	30.3	0.487805
bPAC-MT	40400	30.4	0.731707
bPAC-MT	40500	30.5	0.731707
bPAC-MT	40600	30.6	0.731707
bPAC-MT	40700	30.7	0.487805
bPAC-MT	40800	30.8	0.487805
bPAC-MT	40900	30.9	0.487805
bPAC-MT	41000	31	0.243902
bPAC-MT	41100	31.1	0.487805
bPAC-MT	41200	31.2	0.487805
bPAC-MT	41300	31.3	0.487805
bPAC-MT	41400	31.4	0.243902
bPAC-MT	41500	31.5	0.487805
bPAC-MT	41600	31.6	0.487805
bPAC-MT	41700	31.7	0.487805
bPAC-MT	41800	31.8	0.487805
bPAC-MT	41900	31.9	0.487805
bPAC-MT	42000	32	0.487805
bPAC-MT	42100	32.1	0.243902
bPAC-MT	42200	32.2	0.487805
bPAC-MT	42300	32.3	0.487805
bPAC-MT	42400	32.4	0.487805
bPAC-MT	42500	32.5	0.243902
bPAC-MT	42600	32.6	0.243902
bPAC-MT	42700	32.7	0.243902
bPAC-MT	42800	32.8	0.243902
bPAC-MT	42900	32.9	0.487805
bPAC-MT	43000	33	0.487805
bPAC-MT	43100	33.1	0.487805
bPAC-MT	43200	33.2	0.243902
bPAC-MT	43300	33.3	0.487805
bPAC-MT	43400	33.4	0.487805
bPAC-MT	43500	33.5	0.487805
bPAC-MT	43600	33.6	0.487805
bPAC-MT	43700	33.7	0.487805
bPAC-MT	43800	33.8	0.487805
bPAC-MT	43900	33.9	0.243902
bPAC-MT	44000	34	0.243902
bPAC-MT	44100	34.1	0.243902
bPAC-MT	44200	34.2	0.487805
bPAC-MT	44300	34.3	0.243902
bPAC-MT	44400	34.4	0.243902
bPAC-MT	44500	34.5	0.243902
bPAC-MT	44600	34.6	0.243902
bPAC-MT	44700	34.7	0.243902
bPAC-MT	44800	34.8	0.243902
bPAC-MT	44900	34.9	0.487805
bPAC-MT	45000	35	0.487805
bPAC-MT	45100	35.1	0.487805
bPAC-MT	45200	35.2	0.243902
bPAC-MT	45300	35.3	0.243902
bPAC-MT	45400	35.4	0.243902
bPAC-MT	45500	35.5	0.243902
bPAC-MT	45600	35.6	0.243902
bPAC-MT	45700	35.7	0.243902
bPAC-MT	45800	35.8	0.243902
bPAC-MT	45900	35.9	0
bPAC-MT	46000	36	0
bPAC-MT	46100	36.1	0
bPAC-MT	46200	36.2	0
bPAC-MT	46300	36.3	0
bPAC-MT	46400	36.4	0
bPAC-MT	46500	36.5	0
bPAC-MT	46600	36.6	0.243902
bPAC-MT	46700	36.7	0.243902
bPAC-MT	46800	36.8	0.243902
bPAC-MT	46900	36.9	0.243902
bPAC-MT	47000	37	0.243902
bPAC-MT	47100	37.1	0.243902
bPAC-MT	47200	37.2	0.487805
bPAC-MT	47300	37.3	0.487805
bPAC-MT	47400	37.4	0.487805
bPAC-MT	47500	37.5	0.487805
bPAC-MT	47600	37.6	0.243902
bPAC-MT	47700	37.7	0.243902
bPAC-MT	47800	37.8	0.243902
bPAC-MT	47900	37.9	0.243902
bPAC-MT	48000	38	0.487805
bPAC-MT	48100	38.1	0.487805
bPAC-MT	48200	38.2	0.243902
bPAC-MT	48300	38.3	0.243902
bPAC-MT	48400	38.4	0.243902
bPAC-MT	48500	38.5	0.243902
bPAC-MT	48600	38.6	0.243902
bPAC-MT	48700	38.7	0.487805
bPAC-MT	48800	38.8	0.487805
bPAC-MT	48900	38.9	0.487805
bPAC-MT	49000	39	0.243902
bPAC-MT	49100	39.1	0.243902
bPAC-MT	49200	39.2	0.243902
bPAC-MT	49300	39.3	0.243902
bPAC-MT	49400	39.4	0.487805
bPAC-MT	49500	39.5	0.487805
bPAC-MT	49600	39.6	0.487805
bPAC-MT	49700	39.7	0.243902
bPAC-MT	49800	39.8	0.243902
bPAC-MT	49900	39.9	0.243902
bPAC-MT	50000	40	0.243902
bPAC-MT	50100	40.1	0.487805
bPAC-MT	50200	40.2	0.487805
bPAC-MT	50300	40.3	0.487805
bPAC-MT	50400	40.4	0.243902
bPAC-MT	50500	40.5	0.243902
bPAC-MT	50600	40.6	0.243902
bPAC-MT	50700	40.7	0.243902
bPAC-MT	50800	40.8	0.243902
bPAC-MT	50900	40.9	0.487805
bPAC-MT	51000	41	0.487805
bPAC-MT	51100	41.1	0.243902
bPAC-MT	51200	41.2	0.243902
bPAC-MT	51300	41.3	0.243902
bPAC-MT	51400	41.4	0.243902
bPAC-MT	51500	41.5	0.243902
bPAC-MT	51600	41.6	0.487805
bPAC-MT	51700	41.7	0.487805
bPAC-MT	51800	41.8	0.487805
bPAC-MT	51900	41.9	0.243902
bPAC-MT	52000	42	0.243902
bPAC-MT	52100	42.1	0.243902
bPAC-MT	52200	42.2	0.243902
bPAC-MT	52300	42.3	0.243902
bPAC-MT	52400	42.4	0.487805
bPAC-MT	52500	42.5	0.487805
bPAC-MT	52600	42.6	0.243902
bPAC-MT	52700	42.7	0.243902
bPAC-MT	52800	42.8	0.243902
bPAC-MT	52900	42.9	0.243902
bPAC-MT	53000	43	0.243902
bPAC-MT	53100	43.1	0.487805
bPAC-MT	53200	43.2	0.487805
bPAC-MT	53300	43.3	0.487805
bPAC-MT	53400	43.4	0.243902
bPAC-MT	53500	43.5	0.243902
bPAC-MT	53600	43.6	0.243902
bPAC-MT	53700	43.7	0.243902
bPAC-MT	53800	43.8	0.487805
bPAC-MT	53900	43.9	0.487805
bPAC-MT	54000	44	0.487805
bPAC-MT	54100	44.1	0.243902
bPAC-MT	54200	44.2	0.243902
bPAC-MT	54300	44.3	0.243902
bPAC-MT	54400	44.4	0.243902
bPAC-MT	54500	44.5	0.243902
bPAC-MT	54600	44.6	0.487805
bPAC-MT	54700	44.7	0.487805
bPAC-MT	54800	44.8	0.243902
bPAC-MT	54900	44.9	0.243902
bPAC-MT	55000	45	0.243902
bPAC-MT	55100	45.1	0.243902
bPAC-MT	55200	45.2	0.243902
bPAC-MT	55300	45.3	0.487805
bPAC-MT	55400	45.4	0.487805
bPAC-MT	55500	45.5	0.487805
bPAC-MT	55600	45.6	0.243902
bPAC-MT	55700	45.7	0.243902
bPAC-MT	55800	45.8	0.243902
bPAC-MT	55900	45.9	0.243902
bPAC-MT	56000	46	0.243902
bPAC-MT	56100	46.1	0.487805
bPAC-MT	56200	46.2	0.487805
bPAC-MT	56300	46.3	0.243902
bPAC-MT	56400	46.4	0.243902
bPAC-MT	56500	46.5	0.243902
bPAC-MT	56600	46.6	0.243902
bPAC-MT	56700	46.7	0.243902
bPAC-MT	56800	46.8	0.487805
bPAC-MT	56900	46.9	0.487805
bPAC-MT	57000	47	0.487805
bPAC-MT	57100	47.1	0.243902
bPAC-MT	57200	47.2	0.243902
bPAC-MT	57300	47.3	0.243902
bPAC-MT	57400	47.4	0.243902
bPAC-MT	57500	47.5	0.243902
bPAC-MT	57600	47.6	0.487805
bPAC-MT	57700	47.7	0.487805
bPAC-MT	57800	47.8	0.243902
bPAC-MT	57900	47.9	0.243902
bPAC-MT	58000	48	0.243902
bPAC-MT	58100	48.1	0.243902
bPAC-MT	58200	48.2	0.243902
bPAC-MT	58300	48.3	0.487805
bPAC-MT	58400	48.4	0.487805
bPAC-MT	58500	48.5	0.487805
bPAC-MT	58600	48.6	0.243902
bPAC-MT	58700	48.7	0.243902
bPAC-MT	58800	48.8	0.243902
bPAC-MT	58900	48.9	0.243902
bPAC-MT	59000	49	0.243902
bPAC-MT	59100	49.1	0.487805
bPAC-MT	59200	49.2	0.487805
bPAC-MT	59300	49.3	0.243902
bPAC-MT	59400	49.4	0.243902
bPAC-MT	59500	49.5	0.243902
bPAC-MT	59600	49.6	0.243902
bPAC-MT	59700	49.7	0.243902
bPAC-MT	59800	49.8	0.487805
bPAC-MT	59900	49.9	0.487805
bPAC-MT	60000	50	0.487805
bPAC-MT	60100	50.1	0.243902
bPAC-MT	60200	50.2	0.243902
bPAC-MT	60300	50.3	0.243902
bPAC-MT	60400	50.4	0.243902
bPAC-MT	60500	50.5	0.243902
bPAC-MT	60600	50.6	0.487805
bPAC-MT	60700	50.7	0.487805
bPAC-MT	60800	50.8	0.243902
bPAC-MT	60900	50.9	0.243902
bPAC-MT	61000	51	0.243902
bPAC-MT	61100	51.1	0.243902
bPAC-MT	61200	51.2	0.243902
bPAC-MT	61300	51.3	0.243902
bPAC-MT	61400	51.4	0.487805
bPAC-MT	61500	51.5	0.487805
bPAC-MT	61600	51.6	0.243902
bPAC-MT	61700	51.7	0.243902
bPAC-MT	61800	51.8	0.243902
bPAC-MT	61900	51.9	0.243902
bPAC-MT	62000	52	0.243902
bPAC-MT	62100	52.1	0.487805
bPAC-MT	62200	52.2	0.487805
bPAC-MT	62300	52.3	0.487805
bPAC-MT	62400	52.4	0.243902
bPAC-MT	62500	52.5	0.243902
bPAC-MT	62600	52.6	0.243902
bPAC-MT	62700	52.7	0.243902
bPAC-MT	62800	52.8	0.243902
bPAC-MT	62900	52.9	0.487805
bPAC-MT	63000	53	0.487805
bPAC-MT	63100	53.1	0.243902
bPAC-MT	63200	53.2	0.243902
bPAC-MT	63300	53.3	0.243902
bPAC-MT	63400	53.4	0.243902
bPAC-MT	63500	53.5	0.243902
bPAC-MT	63600	53.6	0.487805
bPAC-MT	63700	53.7	0.487805
bPAC-MT	63800	53.8	0.487805
bPAC-MT	63900	53.9	0.243902
bPAC-MT	64000	54	0.243902
bPAC-MT	64100	54.1	0.243902
bPAC-MT	64200	54.2	0.243902
bPAC-MT	64300	54.3	0.243902
bPAC-MT	64400	54.4	0.487805
bPAC-MT	64500	54.5	0.487805
bPAC-MT	64600	54.6	0.243902
bPAC-MT	64700	54.7	0.243902
bPAC-MT	64800	54.8	0.243902
bPAC-MT	64900	54.9	0.243902
bPAC-MT	65000	55	0.243902
bPAC-MT	65100	55.1	0.243902
bPAC-MT	65200	55.2	0.487805
bPAC-MT	65300	55.3	0.487805
bPAC-MT	65400	55.4	0.243902
bPAC-MT	65500	55.5	0.243902
bPAC-MT	65600	55.6	0.243902
bPAC-MT	65700	55.7	0.243902
bPAC-MT	65800	55.8	0.243902
bPAC-MT	65900	55.9	0.243902
bPAC-MT	66000	56	0.487805
bPAC-MT	66100	56.1	0.487805
bPAC-MT	66200	56.2	0.243902
bPAC-MT	66300	56.3	0.243902
bPAC-MT	66400	56.4	0.243902
bPAC-MT	66500	56.5	0.243902
bPAC-MT	66600	56.6	0.243902
bPAC-MT	66700	56.7	0.243902
bPAC-MT	66800	56.8	0.487805
bPAC-MT	66900	56.9	0.487805
bPAC-MT	67000	57	0.243902
bPAC-MT	67100	57.1	0.243902
bPAC-MT	67200	57.2	0.243902
bPAC-MT	67300	57.3	0.243902
bPAC-MT	67400	57.4	0.243902
bPAC-MT	67500	57.5	0.487805
bPAC-MT	67600	57.6	0.487805
bPAC-MT	67700	57.7	0.487805
bPAC-MT	67800	57.8	0.243902
bPAC-MT	67900	57.9	0.243902
bPAC-MT	68000	58	0.243902
bPAC-MT	68100	58.1	0.243902
bPAC-MT	68200	58.2	0.243902
bPAC-MT	68300	58.3	0.487805
bPAC-MT	68400	58.4	0.487805
bPAC-MT	68500	58.5	0.243902
bPAC-MT	68600	58.6	0.243902
bPAC-MT	68700	58.7	0.243902
bPAC-MT	68800	58.8	0.243902
bPAC-MT	68900	58.9	0.243902
bPAC-MT	69000	59	0.243902
bPAC-MT	69100	59.1	0.487805
bPAC-MT	69200	59.2	0.487805
bPAC-MT	69300	59.3	0.243902
bPAC-MT	69400	59.4	0.243902
bPAC-MT	69500	59.5	0.243902
bPAC-MT	69600	59.6	0.243902
bPAC-MT	69700	59.7	0.243902
bPAC-MT	69800	59.8	0.487805
bPAC-MT	69900	59.9	0.487805
bPAC-MT	70000	60	0.487805
bPAC-MT	70100	60.1	0.243902
bPAC-MT	70200	60.2	0.243902
bPAC-MT	70300	60.3	0.243902
bPAC-MT	70400	60.4	0.243902
bPAC-MT	70500	60.5	0.243902
bPAC-MT	70600	60.6	0.487805
bPAC-MT	70700	60.7	0.487805
bPAC-MT	70800	60.8	0.243902
bPAC-MT	70900	60.9	0.243902
bPAC-MT	71000	61	0.243902
bPAC-MT	71100	61.1	0.243902
bPAC-MT	71200	61.2	0.243902
bPAC-MT	71300	61.3	0.243902
bPAC-MT	71400	61.4	0.487805
bPAC-MT	71500	61.5	0.487805
bPAC-MT	71600	61.6	0.243902
bPAC-MT	71700	61.7	0.243902
bPAC-MT	71800	61.8	0.243902
bPAC-MT	71900	61.9	0.243902
bPAC-MT	72000	62	0.243902
bPAC-MT	72100	62.1	0.487805
bPAC-MT	72200	62.2	0.487805
bPAC-MT	72300	62.3	0.487805
bPAC-MT	72400	62.4	0.243902
bPAC-MT	72500	62.5	0.243902
bPAC-MT	72600	62.6	0.243902
bPAC-MT	72700	62.7	0.243902
bPAC-MT	72800	62.8	0.243902
bPAC-MT	72900	62.9	0.487805
bPAC-MT	73000	63	0.487805
bPAC-MT	73100	63.1	0.243902
bPAC-MT	73200	63.2	0.243902
bPAC-MT	73300	63.3	0.243902
bPAC-MT	73400	63.4	0.243902
bPAC-MT	73500	63.5	0.243902
bPAC-MT	73600	63.6	0.243902
bPAC-MT	73700	63.7	0.487805
bPAC-MT	73800	63.8	0.487805
bPAC-MT	73900	63.9	0.243902
bPAC-MT	74000	64	0.243902
bPAC-MT	74100	64.1	0.243902
bPAC-MT	74200	64.2	0.243902
bPAC-MT	74300	64.3	0.243902
bPAC-MT	74400	64.4	0.243902
bPAC-MT	74500	64.5	0.487805
bPAC-MT	74600	64.6	0.487805
bPAC-MT	74700	64.7	0.243902
bPAC-MT	74800	64.8	0.243902
bPAC-MT	74900	64.9	0.243902
bPAC-MT	75000	65	0.243902
bPAC-MT	75100	65.1	0.243902
bPAC-MT	75200	65.2	0.487805
bPAC-MT	75300	65.3	0.487805
bPAC-MT	75400	65.4	0.487805
bPAC-MT	75500	65.5	0.243902
bPAC-MT	75600	65.6	0.243902
bPAC-MT	75700	65.7	0.243902
bPAC-MT	75800	65.8	0.243902
bPAC-MT	75900	65.9	0.243902
bPAC-MT	76000	66	0.487805
bPAC-MT	76100	66.1	0.487805
bPAC-MT	76200	66.2	0.243902
bPAC-MT	76300	66.3	0.243902
bPAC-MT	76400	66.4	0.243902
bPAC-MT	76500	66.5	0.243902
bPAC-MT	76600	66.6	0.243902
bPAC-MT	76700	66.7	0.487805
bPAC-MT	76800	66.8	0.487805
bPAC-MT	76900	66.9	0.487805
bPAC-MT	77000	67	0.243902
bPAC-MT	77100	67.1	0.243902
bPAC-MT	77200	67.2	0.243902
bPAC-MT	77300	67.3	0.243902
bPAC-MT	77400	67.4	0.243902
bPAC-MT	77500	67.5	0.487805
bPAC-MT	77600	67.6	0.487805
bPAC-MT	77700	67.7	0.243902
bPAC-MT	77800	67.8	0.243902
bPAC-MT	77900	67.9	0.243902
bPAC-MT	78000	68	0.243902
bPAC-MT	78100	68.1	0.243902
bPAC-MT	78200	68.2	0.243902
bPAC-MT	78300	68.3	0.487805
bPAC-MT	78400	68.4	0.487805
bPAC-MT	78500	68.5	0.243902
bPAC-MT	78600	68.6	0.243902
bPAC-MT	78700	68.7	0.243902
bPAC-MT	78800	68.8	0.243902
bPAC-MT	78900	68.9	0.487805
bPAC-MT	79000	69	0.487805
bPAC-MT	79100	69.1	0.487805
bPAC-MT	79200	69.2	0.487805
bPAC-MT	79300	69.3	0.243902
bPAC-MT	79400	69.4	0.243902
bPAC-MT	79500	69.5	0.243902
bPAC-MT	79600	69.6	0.243902
bPAC-MT	79700	69.7	0.243902
bPAC-MT	79800	69.8	0.487805
bPAC-MT	79900	69.9	0.243902
bPAC-MT	80000	70	0.243902
bPAC-MT	80100	70.1	0.243902
bPAC-MT	80200	70.2	0.243902
bPAC-MT	80300	70.3	0.243902
bPAC-MT	80400	70.4	0.243902
bPAC-MT	80500	70.5	0.487805
bPAC-MT	80600	70.6	0.487805
bPAC-MT	80700	70.7	0.487805
bPAC-MT	80800	70.8	0.243902
bPAC-MT	80900	70.9	0.243902
bPAC-MT	81000	71	0.243902
bPAC-MT	81100	71.1	0.243902
bPAC-MT	81200	71.2	0.487805
bPAC-MT	81300	71.3	0.487805
bPAC-MT	81400	71.4	0.487805
bPAC-MT	81500	71.5	0.243902
bPAC-MT	81600	71.6	0.243902
bPAC-MT	81700	71.7	0.243902
bPAC-MT	81800	71.8	0.243902
bPAC-MT	81900	71.9	0.487805
bPAC-MT	82000	72	0.487805
bPAC-MT	82100	72.1	0.487805
bPAC-MT	82200	72.2	0.243902
bPAC-MT	82300	72.3	0.243902
bPAC-MT	82400	72.4	0.243902
bPAC-MT	82500	72.5	0.243902
bPAC-MT	82600	72.6	0.243902
bPAC-MT	82700	72.7	0.487805
bPAC-MT	82800	72.8	0.487805
bPAC-MT	82900	72.9	0.243902
bPAC-MT	83000	73	0.243902
bPAC-MT	83100	73.1	0.243902
bPAC-MT	83200	73.2	0.243902
bPAC-MT	83300	73.3	0.243902
bPAC-MT	83400	73.4	0.487805
bPAC-MT	83500	73.5	0.487805
bPAC-MT	83600	73.6	0.487805
bPAC-MT	83700	73.7	0.243902
bPAC-MT	83800	73.8	0.243902
bPAC-MT	83900	73.9	0.243902
bPAC-MT	84000	74	0.243902
bPAC-MT	84100	74.1	0.487805
bPAC-MT	84200	74.2	0.487805
bPAC-MT	84300	74.3	0.487805
bPAC-MT	84400	74.4	0.243902
bPAC-MT	84500	74.5	0.243902
bPAC-MT	84600	74.6	0.243902
bPAC-MT	84700	74.7	0.243902
bPAC-MT	84800	74.8	0.243902
bPAC-MT	84900	74.9	0.487805
bPAC-MT	85000	75	0.487805
bPAC-MT	85100	75.1	0.243902
bPAC-MT	85200	75.2	0.243902
bPAC-MT	85300	75.3	0.243902
bPAC-MT	85400	75.4	0.243902
bPAC-MT	85500	75.5	0.243902
bPAC-MT	85600	75.6	0.487805
bPAC-MT	85700	75.7	0.487805
bPAC-MT	85800	75.8	0.487805
bPAC-MT	85900	75.9	0.243902
bPAC-MT	86000	76	0.243902
bPAC-MT	86100	76.1	0.243902
bPAC-MT	86200	76.2	0.243902
bPAC-MT	86300	76.3	0.487805
bPAC-MT	86400	76.4	0.487805
bPAC-MT	86500	76.5	0.487805
bPAC-MT	86600	76.6	0.487805
bPAC-MT	86700	76.7	0.487805
bPAC-MT	86800	76.8	0.487805
bPAC-MT	86900	76.9	0.487805
bPAC-MT	87000	77	0.487805
bPAC-MT	87100	77.1	0.487805
bPAC-MT	87200	77.2	0.487805
bPAC-MT	87300	77.3	0.487805
bPAC-MT	87400	77.4	0.487805
bPAC-MT	87500	77.5	0.487805
bPAC-MT	87600	77.6	0.243902
bPAC-MT	87700	77.7	0.243902
bPAC-MT	87800	77.8	0.243902
bPAC-MT	87900	77.9	0.243902
bPAC-MT	88000	78	0.243902
bPAC-MT	88100	78.1	0.243902
bPAC-MT	88200	78.2	0.243902
bPAC-MT	88300	78.3	0
bPAC-MT	88400	78.4	0.243902
bPAC-MT	88500	78.5	0.243902
bPAC-MT	88600	78.6	0.243902
bPAC-MT	88700	78.7	0.243902
bPAC-MT	88800	78.8	0.243902
bPAC-MT	88900	78.9	0.243902
bPAC-MT	89000	79	0.243902
bPAC-MT	89100	79.1	0.487805
bPAC-MT	89200	79.2	0.487805
bPAC-MT	89300	79.3	0.487805
bPAC-MT	89400	79.4	0.243902
bPAC-MT	89500	79.5	0.243902
bPAC-MT	89600	79.6	0.243902
bPAC-MT	89700	79.7	0.243902
bPAC-MT	89800	79.8	0.487805
bPAC-MT	89900	79.9	0.487805
bPAC-MT	90000	80	0.487805
bPAC-MT	90100	80.1	0.243902
bPAC-MT	90200	80.2	0.243902
bPAC-MT	90300	80.3	0.243902
bPAC-MT	90400	80.4	0.487805
bPAC-MT	90500	80.5	0.487805
bPAC-MT	90600	80.6	0.487805
bPAC-MT	90700	80.7	0.487805
bPAC-MT	90800	80.8	0.243902
bPAC-MT	90900	80.9	0.243902
bPAC-MT	91000	81	0.487805
bPAC-MT	91100	81.1	0.487805
bPAC-MT	91200	81.2	0.487805
bPAC-MT	91300	81.3	0.487805
bPAC-MT	91400	81.4	0.243902
bPAC-MT	91500	81.5	0.243902
bPAC-MT	91600	81.6	0.243902
bPAC-MT	91700	81.7	0.487805
bPAC-MT	91800	81.8	0.487805
bPAC-MT	91900	81.9	0.487805
bPAC-MT	92000	82	0.243902
bPAC-MT	92100	82.1	0.243902
bPAC-MT	92200	82.2	0.243902
bPAC-MT	92300	82.3	0.243902
bPAC-MT	92400	82.4	0.243902
bPAC-MT	92500	82.5	0.243902
bPAC-MT	92600	82.6	0.487805
bPAC-MT	92700	82.7	0.243902
bPAC-MT	92800	82.8	0.243902
bPAC-MT	92900	82.9	0.243902
bPAC-MT	93000	83	0.243902
bPAC-MT	93100	83.1	0.243902
bPAC-MT	93200	83.2	0.243902
bPAC-MT	93300	83.3	0.487805
bPAC-MT	93400	83.4	0.487805
bPAC-MT	93500	83.5	0.487805
bPAC-MT	93600	83.6	0.243902
bPAC-MT	93700	83.7	0.243902
bPAC-MT	93800	83.8	0.243902
bPAC-MT	93900	83.9	0.487805
bPAC-MT	94000	84	0.487805
bPAC-MT	94100	84.1	0.487805
bPAC-MT	94200	84.2	0.487805
bPAC-MT	94300	84.3	0.243902
bPAC-MT	94400	84.4	0.243902
bPAC-MT	94500	84.5	0.487805
bPAC-MT	94600	84.6	0.487805
bPAC-MT	94700	84.7	0.487805
bPAC-MT	94800	84.8	0.487805
bPAC-MT	94900	84.9	0.243902
bPAC-MT	95000	85	0.243902
bPAC-MT	95100	85.1	0.487805
bPAC-MT	95200	85.2	0.487805
bPAC-MT	95300	85.3	0.487805
bPAC-MT	95400	85.4	0.487805
bPAC-MT	95500	85.5	0.243902
bPAC-MT	95600	85.6	0.243902
bPAC-MT	95700	85.7	0.487805
bPAC-MT	95800	85.8	0.487805
bPAC-MT	95900	85.9	0.487805
bPAC-MT	96000	86	0.487805
bPAC-MT	96100	86.1	0.243902
bPAC-MT	96200	86.2	0.487805
bPAC-MT	96300	86.3	0.487805
bPAC-MT	96400	86.4	0.487805
bPAC-MT	96500	86.5	0.487805
bPAC-MT	96600	86.6	0.487805
bPAC-MT	96700	86.7	0.243902
bPAC-MT	96800	86.8	0.487805
bPAC-MT	96900	86.9	0.487805
bPAC-MT	97000	87	0.487805
bPAC-MT	97100	87.1	0.487805
bPAC-MT	97200	87.2	0.243902
bPAC-MT	97300	87.3	0.487805
bPAC-MT	97400	87.4	0.487805
bPAC-MT	97500	87.5	0.487805
bPAC-MT	97600	87.6	0.487805
bPAC-MT	97700	87.7	0.487805
bPAC-MT	97800	87.8	0.487805
bPAC-MT	97900	87.9	0.487805
bPAC-MT	98000	88	0.487805
bPAC-MT	98100	88.1	0.487805
bPAC-MT	98200	88.2	0.487805
bPAC-MT	98300	88.3	0.243902
bPAC-MT	98400	88.4	0.487805
bPAC-MT	98500	88.5	0.487805
bPAC-MT	98600	88.6	0.487805
bPAC-MT	98700	88.7	0.487805
bPAC-MT	98800	88.8	0.243902
bPAC-MT	98900	88.9	0.243902
bPAC-MT	99000	89	0.487805
bPAC-MT	99100	89.1	0.487805
bPAC-MT	99200	89.2	0.487805
bPAC-MT	99300	89.3	0.487805
bPAC-MT	99400	89.4	0.243902
bPAC-MT	99500	89.5	0.487805
bPAC-MT	99600	89.6	0.487805
bPAC-MT	99700	89.7	0.487805
bPAC-MT	99800	89.8	0.487805
bPAC-MT	99900	89.9	0.487805
bPAC-MT	100000	90	0.243902
bPAC-MT	100100	90.1	0.487805
bPAC-MT	100200	90.2	0.487805
bPAC-MT	100300	90.3	0.487805
bPAC-MT	100400	90.4	0.487805
bPAC-MT	100500	90.5	0.243902
bPAC-MT	100600	90.6	0.487805
bPAC-MT	100700	90.7	0.487805
bPAC-MT	100800	90.8	0.487805
bPAC-MT	100900	90.9	0.487805
bPAC-MT	101000	91	0.487805
bPAC-MT	101100	91.1	0.243902
bPAC-MT	101200	91.2	0.487805
bPAC-MT	101300	91.3	0.487805
bPAC-MT	101400	91.4	0.487805
bPAC-MT	101500	91.5	0.487805
bPAC-MT	101600	91.6	0.243902
bPAC-MT	101700	91.7	0.487805
bPAC-MT	101800	91.8	0.487805
bPAC-MT	101900	91.9	0.487805
bPAC-MT	102000	92	0.487805
bPAC-MT	102100	92.1	0.487805
bPAC-MT	102200	92.2	0.243902
bPAC-MT	102300	92.3	0.487805
bPAC-MT	102400	92.4	0.487805
bPAC-MT	102500	92.5	0.487805
bPAC-MT	102600	92.6	0.487805
bPAC-MT	102700	92.7	0.243902
bPAC-MT	102800	92.8	0.487805
bPAC-MT	102900	92.9	0.487805
bPAC-MT	103000	93	0.487805
bPAC-MT	103100	93.1	0.487805
bPAC-MT	103200	93.2	0.487805
bPAC-MT	103300	93.3	0.487805
bPAC-MT	103400	93.4	0.487805
bPAC-MT	103500	93.5	0.487805
bPAC-MT	103600	93.6	0.487805
bPAC-MT	103700	93.7	0.487805
bPAC-MT	103800	93.8	0.243902
bPAC-MT	103900	93.9	0.487805
bPAC-MT	104000	94	0.487805
bPAC-MT	104100	94.1	0.487805
bPAC-MT	104200	94.2	0.487805
bPAC-MT	104300	94.3	0.243902
bPAC-MT	104400	94.4	0.487805
bPAC-MT	104500	94.5	0.487805
bPAC-MT	104600	94.6	0.487805
bPAC-MT	104700	94.7	0.487805
bPAC-MT	104800	94.8	0.487805
bPAC-MT	104900	94.9	0.487805
bPAC-MT	105000	95	0.487805
bPAC-MT	105100	95.1	0.487805
bPAC-MT	105200	95.2	0.487805
bPAC-MT	105300	95.3	0.487805
bPAC-MT	105400	95.4	0.487805
bPAC-MT	105500	95.5	0.487805
bPAC-MT	105600	95.6	0.487805
bPAC-MT	105700	95.7	0.487805
bPAC-MT	105800	95.8	0.487805
bPAC-MT	105900	95.9	0.243902
bPAC-MT	106000	96	0.487805
bPAC-MT	106100	96.1	0.487805
bPAC-MT	106200	96.2	0.487805
bPAC-MT	106300	96.3	0.487805
bPAC-MT	106400	96.4	0.243902
bPAC-MT	106500	96.5	0.487805
bPAC-MT	106600	96.6	0.487805
bPAC-MT	106700	96.7	0.487805
bPAC-MT	106800	96.8	0.487805
bPAC-MT	106900	96.9	0.487805
bPAC-MT	107000	97	0.487805
bPAC-MT	107100	97.1	0.487805
bPAC-MT	107200	97.2	0.487805
bPAC-MT	107300	97.3	0.487805
bPAC-MT	107400	97.4	0.487805
bPAC-MT	107500	97.5	0.487805
bPAC-MT	107600	97.6	0.487805
bPAC-MT	107700	97.7	0.487805
bPAC-MT	107800	97.8	0.487805
bPAC-MT	107900	97.9	0.487805
bPAC-MT	108000	98	0.243902
bPAC-MT	108100	98.1	0.487805
bPAC-MT	108200	98.2	0.487805
bPAC-MT	108300	98.3	0.487805
bPAC-MT	108400	98.4	0.487805
bPAC-MT	108500	98.5	0.243902
bPAC-MT	108600	98.6	0.487805
bPAC-MT	108700	98.7	0.487805
bPAC-MT	108800	98.8	0.487805
bPAC-MT	108900	98.9	0.487805
bPAC-MT	109000	99	0.487805
bPAC-MT	109100	99.1	0.487805
bPAC-MT	109200	99.2	0.487805
bPAC-MT	109300	99.3	0.487805
bPAC-MT	109400	99.4	0.487805
bPAC-MT	109500	99.5	0.487805
bPAC-MT	109600	99.6	0.487805
bPAC-MT	109700	99.7	0.487805
bPAC-MT	109800	99.8	0.487805
bPAC-MT	109900	99.9	0.487805
bPAC-MT	110000	100	0.487805
bPAC-MT	110100	100.1	0.487805
bPAC-MT	110200	100.2	0.487805
bPAC-MT	110300	100.3	0.487805
bPAC-MT	110400	100.4	0.487805
bPAC-MT	110500	100.5	0.487805
bPAC-MT	110600	100.6	0.487805
bPAC-MT	110700	100.7	0.487805
bPAC-MT	110800	100.8	0.487805
bPAC-MT	110900	100.9	0.487805
bPAC-MT	111000	101	0.487805
bPAC-MT	111100	101.1	0.487805
bPAC-MT	111200	101.2	0.487805
bPAC-MT	111300	101.3	0.487805
bPAC-MT	111400	101.4	0.487805
bPAC-MT	111500	101.5	0.487805
bPAC-MT	111600	101.6	0.487805
bPAC-MT	111700	101.7	0.487805
bPAC-MT	111800	101.8	0.487805
bPAC-MT	111900	101.9	0.487805
bPAC-MT	112000	102	0.487805
bPAC-MT	112100	102.1	0.487805
bPAC-MT	112200	102.2	0.487805
bPAC-MT	112300	102.3	0.487805
bPAC-MT	112400	102.4	0.487805
bPAC-MT	112500	102.5	0.487805
bPAC-MT	112600	102.6	0.487805
bPAC-MT	112700	102.7	0.487805
bPAC-MT	112800	102.8	0.487805
bPAC-MT	112900	102.9	0.487805
bPAC-MT	113000	103	0.487805
bPAC-MT	113100	103.1	0.487805
bPAC-MT	113200	103.2	0.487805
bPAC-MT	113300	103.3	0.487805
bPAC-MT	113400	103.4	0.487805
bPAC-MT	113500	103.5	0.487805
bPAC-MT	113600	103.6	0.487805
bPAC-MT	113700	103.7	0.487805
bPAC-MT	113800	103.8	0.487805
bPAC-MT	113900	103.9	0.487805
bPAC-MT	114000	104	0.487805
bPAC-MT	114100	104.1	0.487805
bPAC-MT	114200	104.2	0.487805
bPAC-MT	114300	104.3	0.487805
bPAC-MT	114400	104.4	0.487805
bPAC-MT	114500	104.5	0.487805
bPAC-MT	114600	104.6	0.487805
bPAC-MT	114700	104.7	0.487805
bPAC-MT	114800	104.8	0.487805
bPAC-MT	114900	104.9	0.487805
bPAC-MT	115000	105	0.487805
bPAC-MT	115100	105.1	0.487805
bPAC-MT	115200	105.2	0.487805
bPAC-MT	115300	105.3	0.487805
bPAC-MT	115400	105.4	0.487805
bPAC-MT	115500	105.5	0.487805
bPAC-MT	115600	105.6	0.487805
bPAC-MT	115700	105.7	0.487805
bPAC-MT	115800	105.8	0.487805
bPAC-MT	115900	105.9	0.487805
bPAC-MT	116000	106	0.487805
bPAC-MT	116100	106.1	0.487805
bPAC-MT	116200	106.2	0.487805
bPAC-MT	116300	106.3	0.487805
bPAC-MT	116400	106.4	0.487805
bPAC-MT	116500	106.5	0.487805
bPAC-MT	116600	106.6	0.487805
bPAC-MT	116700	106.7	0.487805
bPAC-MT	116800	106.8	0.487805
bPAC-MT	116900	106.9	0.487805
bPAC-MT	117000	107	0.487805
bPAC-MT	117100	107.1	0.487805
bPAC-MT	117200	107.2	0.487805
bPAC-MT	117300	107.3	0.487805
bPAC-MT	117400	107.4	0.487805
bPAC-MT	117500	107.5	0.487805
bPAC-MT	117600	107.6	0.487805
bPAC-MT	117700	107.7	0.487805
bPAC-MT	117800	107.8	0.487805
bPAC-MT	117900	107.9	0.487805
bPAC-MT	118000	108	0.487805
bPAC-MT	118100	108.1	0.487805
bPAC-MT	118200	108.2	0.487805
bPAC-MT	118300	108.3	0.487805
bPAC-MT	118400	108.4	0.487805
bPAC-MT	118500	108.5	0.487805
bPAC-MT	118600	108.6	0.487805
bPAC-MT	118700	108.7	0.487805
bPAC-MT	118800	108.8	0.487805
bPAC-MT	118900	108.9	0.487805
bPAC-MT	119000	109	0.731707
bPAC-MT	119100	109.1	0.487805
bPAC-MT	119200	109.2	0.487805
bPAC-MT	119300	109.3	0.487805
bPAC-MT	119400	109.4	0.731707
bPAC-MT	119500	109.5	0.731707
bPAC-MT	500	-9.5	1
bPAC-MT	600	-9.4	0.5
bPAC-MT	700	-9.3	0.5
bPAC-MT	800	-9.2	0.5
bPAC-MT	900	-9.1	1
bPAC-MT	1000	-9	1
bPAC-MT	1100	-8.9	1
bPAC-MT	1200	-8.8	1.5
bPAC-MT	1300	-8.7	1.5
bPAC-MT	1400	-8.6	1
bPAC-MT	1500	-8.5	1
bPAC-MT	1600	-8.4	1
bPAC-MT	1700	-8.3	1
bPAC-MT	1800	-8.2	1
bPAC-MT	1900	-8.1	1
bPAC-MT	2000	-8	1
bPAC-MT	2100	-7.9	1
bPAC-MT	2200	-7.8	0.5
bPAC-MT	2300	-7.7	0.5
bPAC-MT	2400	-7.6	1
bPAC-MT	2500	-7.5	1
bPAC-MT	2600	-7.4	1
bPAC-MT	2700	-7.3	1
bPAC-MT	2800	-7.2	1.5
bPAC-MT	2900	-7.1	1
bPAC-MT	3000	-7	1
bPAC-MT	3100	-6.9	1
bPAC-MT	3200	-6.8	1
bPAC-MT	3300	-6.7	1
bPAC-MT	3400	-6.6	0.5
bPAC-MT	3500	-6.5	1
bPAC-MT	3600	-6.4	1
bPAC-MT	3700	-6.3	1
bPAC-MT	3800	-6.2	0.5
bPAC-MT	3900	-6.1	0.5
bPAC-MT	4000	-6	1
bPAC-MT	4100	-5.9	1
bPAC-MT	4200	-5.8	1
bPAC-MT	4300	-5.7	1
bPAC-MT	4400	-5.6	1
bPAC-MT	4500	-5.5	1
bPAC-MT	4600	-5.4	1
bPAC-MT	4700	-5.3	1
bPAC-MT	4800	-5.2	1
bPAC-MT	4900	-5.1	1
bPAC-MT	5000	-5	0.5
bPAC-MT	5100	-4.9	1
bPAC-MT	5200	-4.8	1
bPAC-MT	5300	-4.7	1
bPAC-MT	5400	-4.6	1
bPAC-MT	5500	-4.5	0.5
bPAC-MT	5600	-4.4	1
bPAC-MT	5700	-4.3	1
bPAC-MT	5800	-4.2	1
bPAC-MT	5900	-4.1	1
bPAC-MT	6000	-4	1.5
bPAC-MT	6100	-3.9	1
bPAC-MT	6200	-3.8	1
bPAC-MT	6300	-3.7	1
bPAC-MT	6400	-3.6	1.5
bPAC-MT	6500	-3.5	1.5
bPAC-MT	6600	-3.4	1
bPAC-MT	6700	-3.3	1
bPAC-MT	6800	-3.2	1
bPAC-MT	6900	-3.1	1
bPAC-MT	7000	-3	0.5
bPAC-MT	7100	-2.9	1
bPAC-MT	7200	-2.8	1
bPAC-MT	7300	-2.7	1
bPAC-MT	7400	-2.6	0.5
bPAC-MT	7500	-2.5	1
bPAC-MT	7600	-2.4	1
bPAC-MT	7700	-2.3	1
bPAC-MT	7800	-2.2	1
bPAC-MT	7900	-2.1	1
bPAC-MT	8000	-2	1
bPAC-MT	8100	-1.9	0.5
bPAC-MT	8200	-1.8	1
bPAC-MT	8300	-1.7	1
bPAC-MT	8400	-1.6	1
bPAC-MT	8500	-1.5	1
bPAC-MT	8600	-1.4	1
bPAC-MT	8700	-1.3	1
bPAC-MT	8800	-1.2	1
bPAC-MT	8900	-1.1	1
bPAC-MT	9000	-1	1
bPAC-MT	9100	-0.9	1.5
bPAC-MT	9200	-0.8	1
bPAC-MT	9300	-0.7	1
bPAC-MT	9400	-0.6	1
bPAC-MT	9500	-0.5	0.5
bPAC-MT	9600	-0.4	1
bPAC-MT	9700	-0.3	1
bPAC-MT	9800	-0.2	1
bPAC-MT	9900	-0.1	1
bPAC-MT	10000	0	1
bPAC-MT	10100	0.1	0.5
bPAC-MT	10200	0.2	0.5
bPAC-MT	10300	0.3	1
bPAC-MT	10400	0.4	1
bPAC-MT	10500	0.5	1
bPAC-MT	10600	0.6	0.5
bPAC-MT	10700	0.7	0.5
bPAC-MT	10800	0.8	1
bPAC-MT	10900	0.9	1
bPAC-MT	11000	1	1
bPAC-MT	11100	1.1	1
bPAC-MT	11200	1.2	1
bPAC-MT	11300	1.3	0.5
bPAC-MT	11400	1.4	1
bPAC-MT	11500	1.5	1
bPAC-MT	11600	1.6	1
bPAC-MT	11700	1.7	1
bPAC-MT	11800	1.8	1
bPAC-MT	11900	1.9	1
bPAC-MT	12000	2	1
bPAC-MT	12100	2.1	1
bPAC-MT	12200	2.2	1
bPAC-MT	12300	2.3	1
bPAC-MT	12400	2.4	1
bPAC-MT	12500	2.5	1
bPAC-MT	12600	2.6	1
bPAC-MT	12700	2.7	1
bPAC-MT	12800	2.8	0.5
bPAC-MT	12900	2.9	1
bPAC-MT	13000	3	1
bPAC-MT	13100	3.1	1
bPAC-MT	13200	3.2	1
bPAC-MT	13300	3.3	1
bPAC-MT	13400	3.4	1
bPAC-MT	13500	3.5	1
bPAC-MT	13600	3.6	1
bPAC-MT	13700	3.7	1
bPAC-MT	13800	3.8	1
bPAC-MT	13900	3.9	1
bPAC-MT	14000	4	1
bPAC-MT	14100	4.1	1
bPAC-MT	14200	4.2	1
bPAC-MT	14300	4.3	1
bPAC-MT	14400	4.4	0.5
bPAC-MT	14500	4.5	1
bPAC-MT	14600	4.6	1
bPAC-MT	14700	4.7	1
bPAC-MT	14800	4.8	1
bPAC-MT	14900	4.9	0.5
bPAC-MT	15000	5	1
bPAC-MT	15100	5.1	1
bPAC-MT	15200	5.2	1
bPAC-MT	15300	5.3	1
bPAC-MT	15400	5.4	1
bPAC-MT	15700	5.7	1
bPAC-MT	15800	5.8	1
bPAC-MT	15900	5.9	1
bPAC-MT	16000	6	1
bPAC-MT	16100	6.1	1
bPAC-MT	16200	6.2	1
bPAC-MT	16300	6.3	1
bPAC-MT	16400	6.4	1
bPAC-MT	16500	6.5	1
bPAC-MT	16600	6.6	1
bPAC-MT	16700	6.7	1
bPAC-MT	16800	6.8	1
bPAC-MT	16900	6.9	1
bPAC-MT	17000	7	1
bPAC-MT	17100	7.1	1
bPAC-MT	17200	7.2	1
bPAC-MT	17300	7.3	1
bPAC-MT	17400	7.4	1
bPAC-MT	17500	7.5	1
bPAC-MT	17600	7.6	1
bPAC-MT	17700	7.7	1
bPAC-MT	17800	7.8	1
bPAC-MT	17900	7.9	1
bPAC-MT	18000	8	0.5
bPAC-MT	18100	8.1	1
bPAC-MT	18200	8.2	1
bPAC-MT	18300	8.3	1
bPAC-MT	18400	8.4	1
bPAC-MT	18500	8.5	0.5
bPAC-MT	18600	8.6	1
bPAC-MT	18700	8.7	1
bPAC-MT	18800	8.8	1
bPAC-MT	18900	8.9	1
bPAC-MT	19000	9	1
bPAC-MT	19100	9.1	1
bPAC-MT	19200	9.2	1
bPAC-MT	19300	9.3	1
bPAC-MT	19400	9.4	1
bPAC-MT	19500	9.5	1
bPAC-MT	19600	9.6	1
bPAC-MT	19700	9.7	1
bPAC-MT	19800	9.8	1
bPAC-MT	19900	9.9	1
bPAC-MT	20000	10	1
bPAC-MT	20100	10.1	1
bPAC-MT	20200	10.2	1
bPAC-MT	20300	10.3	1
bPAC-MT	20400	10.4	1
bPAC-MT	20500	10.5	1
bPAC-MT	20600	10.6	0.5
bPAC-MT	20700	10.7	1
bPAC-MT	20800	10.8	1
bPAC-MT	20900	10.9	1
bPAC-MT	21000	11	1
bPAC-MT	21100	11.1	0.5
bPAC-MT	21200	11.2	0.5
bPAC-MT	21300	11.3	1
bPAC-MT	21400	11.4	1
bPAC-MT	21500	11.5	1
bPAC-MT	21600	11.6	1
bPAC-MT	21700	11.7	0.5
bPAC-MT	21800	11.8	1
bPAC-MT	21900	11.9	1
bPAC-MT	22000	12	1
bPAC-MT	22100	12.1	1
bPAC-MT	22200	12.2	1
bPAC-MT	22300	12.3	1
bPAC-MT	22400	12.4	1
bPAC-MT	22500	12.5	1
bPAC-MT	22600	12.6	1
bPAC-MT	22700	12.7	1
bPAC-MT	22800	12.8	0.5
bPAC-MT	22900	12.9	1
bPAC-MT	23000	13	1
bPAC-MT	23100	13.1	1
bPAC-MT	23200	13.2	1
bPAC-MT	23300	13.3	0.5
bPAC-MT	23400	13.4	1
bPAC-MT	23500	13.5	1
bPAC-MT	23600	13.6	1
bPAC-MT	23700	13.7	1
bPAC-MT	23800	13.8	1
bPAC-MT	23900	13.9	0.5
bPAC-MT	24000	14	1
bPAC-MT	24100	14.1	1
bPAC-MT	24200	14.2	1
bPAC-MT	24300	14.3	1
bPAC-MT	24400	14.4	0.5
bPAC-MT	24500	14.5	1
bPAC-MT	24600	14.6	1
bPAC-MT	24700	14.7	1
bPAC-MT	24800	14.8	1
bPAC-MT	24900	14.9	1
bPAC-MT	25000	15	0.5
bPAC-MT	25100	15.1	1
bPAC-MT	25200	15.2	1
bPAC-MT	25300	15.3	1
bPAC-MT	25400	15.4	1
bPAC-MT	25500	15.5	0.5
bPAC-MT	25600	15.6	1
bPAC-MT	25700	15.7	1
bPAC-MT	25800	15.8	1
bPAC-MT	25900	15.9	1
bPAC-MT	26000	16	1
bPAC-MT	26100	16.1	0.5
bPAC-MT	26200	16.2	1
bPAC-MT	26300	16.3	1
bPAC-MT	26400	16.4	1
bPAC-MT	26500	16.5	1
bPAC-MT	26600	16.6	0.5
bPAC-MT	26700	16.7	1
bPAC-MT	26800	16.8	1
bPAC-MT	26900	16.9	1
bPAC-MT	27000	17	1
bPAC-MT	27100	17.1	1
bPAC-MT	27200	17.2	0.5
bPAC-MT	27300	17.3	1
bPAC-MT	27400	17.4	1
bPAC-MT	27500	17.5	1
bPAC-MT	27600	17.6	1
bPAC-MT	27700	17.7	0.5
bPAC-MT	27800	17.8	0.5
bPAC-MT	27900	17.9	1
bPAC-MT	28000	18	1
bPAC-MT	28100	18.1	1
bPAC-MT	28200	18.2	1
bPAC-MT	28300	18.3	0.5
bPAC-MT	28400	18.4	0.5
bPAC-MT	28500	18.5	1
bPAC-MT	28600	18.6	1
bPAC-MT	28700	18.7	1
bPAC-MT	28800	18.8	1
bPAC-MT	28900	18.9	0.5
bPAC-MT	29000	19	1
bPAC-MT	29100	19.1	1
bPAC-MT	29200	19.2	1
bPAC-MT	29300	19.3	1
bPAC-MT	29400	19.4	1
bPAC-MT	29500	19.5	0.5
bPAC-MT	29600	19.6	1
bPAC-MT	29700	19.7	1
bPAC-MT	29800	19.8	1
bPAC-MT	29900	19.9	1
bPAC-MT	30000	20	0.5
bPAC-MT	30100	20.1	1
bPAC-MT	30200	20.2	1
bPAC-MT	30300	20.3	1
bPAC-MT	30400	20.4	1
bPAC-MT	30500	20.5	1.5
bPAC-MT	30600	20.6	1
bPAC-MT	30700	20.7	1
bPAC-MT	30800	20.8	1
bPAC-MT	30900	20.9	1
bPAC-MT	31000	21	1
bPAC-MT	31100	21.1	0.5
bPAC-MT	31200	21.2	0.5
bPAC-MT	31300	21.3	1
bPAC-MT	31400	21.4	1
bPAC-MT	31500	21.5	0.5
bPAC-MT	31600	21.6	0.5
bPAC-MT	31700	21.7	0.5
bPAC-MT	31800	21.8	0.5
bPAC-MT	31900	21.9	1
bPAC-MT	32000	22	1
bPAC-MT	32100	22.1	1
bPAC-MT	32200	22.2	1
bPAC-MT	32300	22.3	0.5
bPAC-MT	32400	22.4	0.5
bPAC-MT	32500	22.5	1
bPAC-MT	32600	22.6	1
bPAC-MT	32700	22.7	1
bPAC-MT	32800	22.8	1
bPAC-MT	32900	22.9	0.5
bPAC-MT	33000	23	0.5
bPAC-MT	33100	23.1	1
bPAC-MT	33200	23.2	1
bPAC-MT	33300	23.3	1
bPAC-MT	33400	23.4	1
bPAC-MT	33500	23.5	0.5
bPAC-MT	33600	23.6	0.5
bPAC-MT	33700	23.7	1
bPAC-MT	33800	23.8	1
bPAC-MT	33900	23.9	1
bPAC-MT	34000	24	1
bPAC-MT	34100	24.1	0.5
bPAC-MT	34200	24.2	0.5
bPAC-MT	34300	24.3	0.5
bPAC-MT	34400	24.4	1
bPAC-MT	34500	24.5	1
bPAC-MT	34600	24.6	1
bPAC-MT	34700	24.7	0.5
bPAC-MT	34800	24.8	0.5
bPAC-MT	34900	24.9	0.5
bPAC-MT	35000	25	1
bPAC-MT	35100	25.1	1
bPAC-MT	35200	25.2	1
bPAC-MT	35300	25.3	1
bPAC-MT	35400	25.4	0.5
bPAC-MT	35500	25.5	1
bPAC-MT	35600	25.6	1
bPAC-MT	35700	25.7	1
bPAC-MT	35800	25.8	1
bPAC-MT	35900	25.9	1
bPAC-MT	36000	26	0.5
bPAC-MT	36100	26.1	1
bPAC-MT	36200	26.2	1
bPAC-MT	36300	26.3	1
bPAC-MT	36400	26.4	1
bPAC-MT	36500	26.5	0.5
bPAC-MT	36600	26.6	0.5
bPAC-MT	36700	26.7	0.5
bPAC-MT	36800	26.8	1
bPAC-MT	36900	26.9	1
bPAC-MT	37000	27	1
bPAC-MT	37100	27.1	0.5
bPAC-MT	37200	27.2	0.5
bPAC-MT	37300	27.3	1
bPAC-MT	37400	27.4	1
bPAC-MT	37500	27.5	1
bPAC-MT	37600	27.6	1
bPAC-MT	37700	27.7	1
bPAC-MT	37800	27.8	0.5
bPAC-MT	37900	27.9	0.5
bPAC-MT	38000	28	1
bPAC-MT	38100	28.1	1
bPAC-MT	38200	28.2	1
bPAC-MT	38300	28.3	0.5
bPAC-MT	38400	28.4	0.5
bPAC-MT	38500	28.5	0.5
bPAC-MT	38600	28.6	1
bPAC-MT	38700	28.7	1
bPAC-MT	38800	28.8	1
bPAC-MT	38900	28.9	1
bPAC-MT	39000	29	0.5
bPAC-MT	39100	29.1	0.5
bPAC-MT	39200	29.2	1
bPAC-MT	39300	29.3	1
bPAC-MT	39400	29.4	1
bPAC-MT	39500	29.5	1
bPAC-MT	39600	29.6	0.5
bPAC-MT	39700	29.7	0.5
bPAC-MT	39800	29.8	0.5
bPAC-MT	39900	29.9	1
bPAC-MT	40000	30	1
bPAC-MT	40100	30.1	1
bPAC-MT	40200	30.2	0.5
bPAC-MT	40300	30.3	0.5
bPAC-MT	40400	30.4	0.5
bPAC-MT	40500	30.5	0.5
bPAC-MT	40600	30.6	1
bPAC-MT	40700	30.7	1
bPAC-MT	40800	30.8	1
bPAC-MT	40900	30.9	0.5
bPAC-MT	41000	31	1
bPAC-MT	41100	31.1	1
bPAC-MT	41200	31.2	1
bPAC-MT	41300	31.3	1
bPAC-MT	41400	31.4	1
bPAC-MT	41500	31.5	1
bPAC-MT	41600	31.6	0.5
bPAC-MT	41700	31.7	1
bPAC-MT	41800	31.8	1
bPAC-MT	41900	31.9	1
bPAC-MT	42000	32	0.5
bPAC-MT	42100	32.1	0.5
bPAC-MT	42200	32.2	0.5
bPAC-MT	42300	32.3	0.5
bPAC-MT	42400	32.4	1
bPAC-MT	42500	32.5	1
bPAC-MT	42600	32.6	1
bPAC-MT	42700	32.7	0.5
bPAC-MT	42800	32.8	0.5
bPAC-MT	42900	32.9	0.5
bPAC-MT	43000	33	0.5
bPAC-MT	43100	33.1	1
bPAC-MT	43200	33.2	1
bPAC-MT	43300	33.3	1
bPAC-MT	43400	33.4	0.5
bPAC-MT	43500	33.5	0.5
bPAC-MT	43600	33.6	0.5
bPAC-MT	43700	33.7	0.5
bPAC-MT	43800	33.8	1
bPAC-MT	43900	33.9	1
bPAC-MT	44000	34	1
bPAC-MT	44100	34.1	0.5
bPAC-MT	44200	34.2	0.5
bPAC-MT	44300	34.3	0.5
bPAC-MT	44400	34.4	0.5
bPAC-MT	44500	34.5	1
bPAC-MT	44600	34.6	1
bPAC-MT	44700	34.7	1
bPAC-MT	44800	34.8	0.5
bPAC-MT	44900	34.9	0.5
bPAC-MT	45000	35	0.5
bPAC-MT	45100	35.1	1
bPAC-MT	45200	35.2	1
bPAC-MT	45300	35.3	1
bPAC-MT	45400	35.4	1
bPAC-MT	45500	35.5	0.5
bPAC-MT	45600	35.6	0.5
bPAC-MT	45700	35.7	0.5
bPAC-MT	45800	35.8	1
bPAC-MT	45900	35.9	1
bPAC-MT	46000	36	1
bPAC-MT	46100	36.1	0.5
bPAC-MT	46200	36.2	0.5
bPAC-MT	46300	36.3	0.5
bPAC-MT	46400	36.4	0.5
bPAC-MT	46500	36.5	1
bPAC-MT	46600	36.6	1
bPAC-MT	46700	36.7	1
bPAC-MT	46800	36.8	0.5
bPAC-MT	46900	36.9	0.5
bPAC-MT	47000	37	0.5
bPAC-MT	47100	37.1	0.5
bPAC-MT	47200	37.2	0.5
bPAC-MT	47300	37.3	0.5
bPAC-MT	47400	37.4	0.5
bPAC-MT	47500	37.5	0
bPAC-MT	47600	37.6	0
bPAC-MT	47700	37.7	0
bPAC-MT	47800	37.8	0
bPAC-MT	47900	37.9	0
bPAC-MT	48000	38	0
bPAC-MT	48100	38.1	0
bPAC-MT	48200	38.2	0
bPAC-MT	48300	38.3	0
bPAC-MT	48400	38.4	0
bPAC-MT	48500	38.5	0.5
bPAC-MT	48600	38.6	0.5
bPAC-MT	48700	38.7	0.5
bPAC-MT	48800	38.8	0.5
bPAC-MT	48900	38.9	0.5
bPAC-MT	49000	39	0.5
bPAC-MT	49100	39.1	0.5
bPAC-MT	49200	39.2	0.5
bPAC-MT	49300	39.3	1
bPAC-MT	49400	39.4	1
bPAC-MT	49500	39.5	0.5
bPAC-MT	49600	39.6	0.5
bPAC-MT	49700	39.7	0.5
bPAC-MT	49800	39.8	0.5
bPAC-MT	49900	39.9	0.5
bPAC-MT	50000	40	1
bPAC-MT	50100	40.1	1
bPAC-MT	50200	40.2	1
bPAC-MT	50300	40.3	0.5
bPAC-MT	50400	40.4	0.5
bPAC-MT	50500	40.5	1
bPAC-MT	50600	40.6	1
bPAC-MT	50700	40.7	1
bPAC-MT	50800	40.8	1
bPAC-MT	50900	40.9	1
bPAC-MT	51000	41	0.5
bPAC-MT	51100	41.1	0.5
bPAC-MT	51200	41.2	0.5
bPAC-MT	51300	41.3	1
bPAC-MT	51400	41.4	1
bPAC-MT	51500	41.5	0.5
bPAC-MT	51600	41.6	0.5
bPAC-MT	51700	41.7	0.5
bPAC-MT	51800	41.8	0.5
bPAC-MT	51900	41.9	0.5
bPAC-MT	52000	42	0.5
bPAC-MT	52100	42.1	1
bPAC-MT	52200	42.2	1
bPAC-MT	52300	42.3	0.5
bPAC-MT	52400	42.4	0.5
bPAC-MT	52500	42.5	0.5
bPAC-MT	52600	42.6	0.5
bPAC-MT	52700	42.7	1
bPAC-MT	52800	42.8	1
bPAC-MT	52900	42.9	1
bPAC-MT	53000	43	1
bPAC-MT	53100	43.1	0.5
bPAC-MT	53200	43.2	0.5
bPAC-MT	53300	43.3	0.5
bPAC-MT	53400	43.4	0.5
bPAC-MT	53500	43.5	1
bPAC-MT	53600	43.6	1
bPAC-MT	53700	43.7	0.5
bPAC-MT	53800	43.8	0.5
bPAC-MT	53900	43.9	0.5
bPAC-MT	54000	44	0.5
bPAC-MT	54100	44.1	0.5
bPAC-MT	54200	44.2	0.5
bPAC-MT	54300	44.3	0.5
bPAC-MT	54400	44.4	1
bPAC-MT	54500	44.5	0.5
bPAC-MT	54600	44.6	0.5
bPAC-MT	54700	44.7	0.5
bPAC-MT	54800	44.8	0.5
bPAC-MT	54900	44.9	0.5
bPAC-MT	55000	45	0.5
bPAC-MT	55100	45.1	0.5
bPAC-MT	55200	45.2	1
bPAC-MT	55300	45.3	1
bPAC-MT	55400	45.4	0.5
bPAC-MT	55500	45.5	0.5
bPAC-MT	55600	45.6	0.5
bPAC-MT	55700	45.7	0.5
bPAC-MT	55800	45.8	0.5
bPAC-MT	55900	45.9	0.5
bPAC-MT	56000	46	1
bPAC-MT	56100	46.1	1
bPAC-MT	56200	46.2	0.5
bPAC-MT	56300	46.3	0.5
bPAC-MT	56400	46.4	0.5
bPAC-MT	56500	46.5	0.5
bPAC-MT	56600	46.6	0.5
bPAC-MT	56700	46.7	1
bPAC-MT	56800	46.8	1
bPAC-MT	56900	46.9	1
bPAC-MT	57000	47	0.5
bPAC-MT	57100	47.1	0.5
bPAC-MT	57200	47.2	0.5
bPAC-MT	57300	47.3	0.5
bPAC-MT	57400	47.4	0.5
bPAC-MT	57500	47.5	1
bPAC-MT	57600	47.6	1
bPAC-MT	57700	47.7	0.5
bPAC-MT	57800	47.8	0.5
bPAC-MT	57900	47.9	0.5
bPAC-MT	58000	48	0.5
bPAC-MT	58100	48.1	0.5
bPAC-MT	58200	48.2	0.5
bPAC-MT	58300	48.3	1
bPAC-MT	58400	48.4	1
bPAC-MT	58500	48.5	0.5
bPAC-MT	58600	48.6	0.5
bPAC-MT	58700	48.7	0.5
bPAC-MT	58800	48.8	0.5
bPAC-MT	58900	48.9	0.5
bPAC-MT	59000	49	1
bPAC-MT	59100	49.1	1
bPAC-MT	59200	49.2	1
bPAC-MT	59300	49.3	0.5
bPAC-MT	59400	49.4	0.5
bPAC-MT	59500	49.5	0.5
bPAC-MT	59600	49.6	0.5
bPAC-MT	59700	49.7	0.5
bPAC-MT	59800	49.8	1
bPAC-MT	59900	49.9	1
bPAC-MT	60000	50	0.5
bPAC-MT	60100	50.1	0.5
bPAC-MT	60200	50.2	0.5
bPAC-MT	60300	50.3	0.5
bPAC-MT	60400	50.4	0.5
bPAC-MT	60500	50.5	0.5
bPAC-MT	60600	50.6	1
bPAC-MT	60700	50.7	1
bPAC-MT	60800	50.8	0.5
bPAC-MT	60900	50.9	0.5
bPAC-MT	61000	51	0.5
bPAC-MT	61100	51.1	0.5
bPAC-MT	61200	51.2	0.5
bPAC-MT	61300	51.3	0.5
bPAC-MT	61400	51.4	0.5
bPAC-MT	61500	51.5	1
bPAC-MT	61600	51.6	0.5
bPAC-MT	61700	51.7	0.5
bPAC-MT	61800	51.8	0.5
bPAC-MT	61900	51.9	0.5
bPAC-MT	62000	52	0.5
bPAC-MT	62100	52.1	0.5
bPAC-MT	62200	52.2	0.5
bPAC-MT	62300	52.3	1
bPAC-MT	62400	52.4	1
bPAC-MT	62500	52.5	0.5
bPAC-MT	62600	52.6	0.5
bPAC-MT	62700	52.7	0.5
bPAC-MT	62800	52.8	0.5
bPAC-MT	62900	52.9	0.5
bPAC-MT	63000	53	0.5
bPAC-MT	63100	53.1	1
bPAC-MT	63200	53.2	1
bPAC-MT	63300	53.3	0.5
bPAC-MT	63400	53.4	0.5
bPAC-MT	63500	53.5	0.5
bPAC-MT	63600	53.6	0.5
bPAC-MT	63700	53.7	0.5
bPAC-MT	63800	53.8	0.5
bPAC-MT	63900	53.9	1
bPAC-MT	64000	54	1
bPAC-MT	64100	54.1	0.5
bPAC-MT	64200	54.2	0.5
bPAC-MT	64300	54.3	0.5
bPAC-MT	64400	54.4	0.5
bPAC-MT	64500	54.5	0.5
bPAC-MT	64600	54.6	0.5
bPAC-MT	64700	54.7	1
bPAC-MT	64800	54.8	1
bPAC-MT	64900	54.9	0.5
bPAC-MT	65000	55	0.5
bPAC-MT	65100	55.1	0.5
bPAC-MT	65200	55.2	0.5
bPAC-MT	65300	55.3	0.5
bPAC-MT	65400	55.4	0.5
bPAC-MT	65500	55.5	0.5
bPAC-MT	65600	55.6	1
bPAC-MT	65700	55.7	0.5
bPAC-MT	65800	55.8	0.5
bPAC-MT	65900	55.9	0.5
bPAC-MT	66000	56	0.5
bPAC-MT	66100	56.1	0.5
bPAC-MT	66200	56.2	0.5
bPAC-MT	66300	56.3	0.5
bPAC-MT	66400	56.4	1
bPAC-MT	66500	56.5	1
bPAC-MT	66600	56.6	0.5
bPAC-MT	66700	56.7	0.5
bPAC-MT	66800	56.8	0.5
bPAC-MT	66900	56.9	0.5
bPAC-MT	67000	57	0.5
bPAC-MT	67100	57.1	0.5
bPAC-MT	67200	57.2	0.5
bPAC-MT	67300	57.3	1
bPAC-MT	67400	57.4	0.5
bPAC-MT	67500	57.5	0.5
bPAC-MT	67600	57.6	0.5
bPAC-MT	67700	57.7	0.5
bPAC-MT	67800	57.8	0.5
bPAC-MT	67900	57.9	0.5
bPAC-MT	68000	58	0.5
bPAC-MT	68100	58.1	0.5
bPAC-MT	68200	58.2	1
bPAC-MT	68300	58.3	0.5
bPAC-MT	68400	58.4	0.5
bPAC-MT	68500	58.5	0.5
bPAC-MT	68600	58.6	0.5
bPAC-MT	68700	58.7	0.5
bPAC-MT	68800	58.8	0.5
bPAC-MT	68900	58.9	0.5
bPAC-MT	69000	59	1
bPAC-MT	69100	59.1	1
bPAC-MT	69200	59.2	0.5
bPAC-MT	69300	59.3	0.5
bPAC-MT	69400	59.4	0.5
bPAC-MT	69500	59.5	0.5
bPAC-MT	69600	59.6	0.5
bPAC-MT	69700	59.7	0.5
bPAC-MT	69800	59.8	0.5
bPAC-MT	69900	59.9	1
bPAC-MT	70000	60	0.5
bPAC-MT	70100	60.1	0.5
bPAC-MT	70200	60.2	0.5
bPAC-MT	70300	60.3	0.5
bPAC-MT	70400	60.4	0.5
bPAC-MT	70500	60.5	0.5
bPAC-MT	70600	60.6	0.5
bPAC-MT	70700	60.7	0.5
bPAC-MT	70800	60.8	1
bPAC-MT	70900	60.9	0.5
bPAC-MT	71000	61	0.5
bPAC-MT	71100	61.1	0.5
bPAC-MT	71200	61.2	0.5
bPAC-MT	71300	61.3	0.5
bPAC-MT	71400	61.4	0.5
bPAC-MT	71500	61.5	0.5
bPAC-MT	71600	61.6	0.5
bPAC-MT	71700	61.7	1
bPAC-MT	71800	61.8	0.5
bPAC-MT	71900	61.9	0.5
bPAC-MT	72000	62	0.5
bPAC-MT	72100	62.1	0.5
bPAC-MT	72200	62.2	0.5
bPAC-MT	72300	62.3	0.5
bPAC-MT	72400	62.4	0.5
bPAC-MT	72500	62.5	0.5
bPAC-MT	72600	62.6	0.5
bPAC-MT	72700	62.7	0.5
bPAC-MT	72800	62.8	0.5
bPAC-MT	72900	62.9	0.5
bPAC-MT	73000	63	0.5
bPAC-MT	73100	63.1	0.5
bPAC-MT	73200	63.2	0.5
bPAC-MT	73300	63.3	0.5
bPAC-MT	73400	63.4	0.5
bPAC-MT	73500	63.5	0.5
bPAC-MT	73600	63.6	1
bPAC-MT	73700	63.7	0.5
bPAC-MT	73800	63.8	0.5
bPAC-MT	73900	63.9	0.5
bPAC-MT	74000	64	0.5
bPAC-MT	74100	64.1	0.5
bPAC-MT	74200	64.2	0.5
bPAC-MT	74300	64.3	0.5
bPAC-MT	74400	64.4	1
bPAC-MT	74500	64.5	1
bPAC-MT	74600	64.6	0.5
bPAC-MT	74700	64.7	0.5
bPAC-MT	74800	64.8	0.5
bPAC-MT	74900	64.9	0.5
bPAC-MT	75000	65	0.5
bPAC-MT	75100	65.1	0.5
bPAC-MT	75200	65.2	0.5
bPAC-MT	75300	65.3	0.5
bPAC-MT	75400	65.4	0
bPAC-MT	75500	65.5	0.5
bPAC-MT	75600	65.6	0.5
bPAC-MT	75700	65.7	0.5
bPAC-MT	75800	65.8	0.5
bPAC-MT	75900	65.9	0.5
bPAC-MT	76000	66	0.5
bPAC-MT	76100	66.1	0.5
bPAC-MT	76200	66.2	0.5
bPAC-MT	76300	66.3	0.5
bPAC-MT	76400	66.4	0.5
bPAC-MT	76500	66.5	0.5
bPAC-MT	76600	66.6	0.5
bPAC-MT	76700	66.7	0.5
bPAC-MT	76800	66.8	0.5
bPAC-MT	76900	66.9	0.5
bPAC-MT	77000	67	0.5
bPAC-MT	77100	67.1	0.5
bPAC-MT	77200	67.2	0.5
bPAC-MT	77300	67.3	0.5
bPAC-MT	77400	67.4	1
bPAC-MT	77500	67.5	0.5
bPAC-MT	77600	67.6	0.5
bPAC-MT	77700	67.7	0.5
bPAC-MT	77800	67.8	0.5
bPAC-MT	77900	67.9	0.5
bPAC-MT	78000	68	0.5
bPAC-MT	78100	68.1	0.5
bPAC-MT	78200	68.2	0.5
bPAC-MT	78300	68.3	1
bPAC-MT	78400	68.4	0.5
bPAC-MT	78500	68.5	0.5
bPAC-MT	78600	68.6	0.5
bPAC-MT	78700	68.7	0.5
bPAC-MT	78800	68.8	0.5
bPAC-MT	78900	68.9	0.5
bPAC-MT	79000	69	0.5
bPAC-MT	79100	69.1	0.5
bPAC-MT	79200	69.2	0.5
bPAC-MT	79300	69.3	0
bPAC-MT	79400	69.4	0
bPAC-MT	79500	69.5	0
bPAC-MT	79600	69.6	0
bPAC-MT	79700	69.7	0
bPAC-MT	79800	69.8	0
bPAC-MT	79900	69.9	0
bPAC-MT	80000	70	0
bPAC-MT	80100	70.1	0
bPAC-MT	80200	70.2	0
bPAC-MT	80300	70.3	0
bPAC-MT	80400	70.4	0
bPAC-MT	80500	70.5	0
bPAC-MT	80600	70.6	0
bPAC-MT	80700	70.7	0
bPAC-MT	80800	70.8	0
bPAC-MT	80900	70.9	0
bPAC-MT	81000	71	0
bPAC-MT	81100	71.1	0
bPAC-MT	81200	71.2	0
bPAC-MT	81300	71.3	0
bPAC-MT	81400	71.4	0
bPAC-MT	81500	71.5	0
bPAC-MT	81600	71.6	0
[truncated: 2,757 more rows]
