# Supplementary material for: Optogenetic manipulation of neuronal and cardiomyocyte functions in zebrafish using microbial rhodopsins and adenylyl cyclases
Source: eLife. 2023 Aug 17;12:e83975. doi: 10.7554/eLife.83975 (PMC10435232; doi:10.7554/eLife.83975)
Supplement: Figure 7—source data 1. [file elife-83975-fig7-data1.xlsx]

## Sheet: B
Line	time	position
bPAC-MT	-1.0105	-0.00710847
bPAC-MT	-0.995502	-0.00710847
bPAC-MT	-0.98051	-0.00710847
bPAC-MT	-0.965518	-0.00710847
bPAC-MT	-0.950525	-0.00710847
bPAC-MT	-0.935532	-0.00710847
bPAC-MT	-0.92054	-0.00710847
bPAC-MT	-0.905547	-0.00710847
bPAC-MT	-0.890555	-0.00710847
bPAC-MT	-0.875563	-0.00710847
bPAC-MT	-0.86057	-0.00710847
bPAC-MT	-0.845577	-0.00710847
bPAC-MT	-0.830585	-0.00710847
bPAC-MT	-0.815592	-0.00710847
bPAC-MT	-0.8006	-0.00710847
bPAC-MT	-0.785607	-0.00710847
bPAC-MT	-0.770615	-0.00710847
bPAC-MT	-0.755622	-0.00710847
bPAC-MT	-0.74063	-0.00710847
bPAC-MT	-0.725637	-0.00710847
bPAC-MT	-0.710645	-0.00710847
bPAC-MT	-0.695653	-0.00710847
bPAC-MT	-0.68066	-0.00710847
bPAC-MT	-0.665667	-0.00710847
bPAC-MT	-0.650675	-0.00710847
bPAC-MT	-0.635682	-0.00710847
bPAC-MT	-0.62069	-0.00710847
bPAC-MT	-0.605697	-0.00710847
bPAC-MT	-0.590705	-0.00710847
bPAC-MT	-0.575712	-0.00710847
bPAC-MT	-0.56072	-0.00710847
bPAC-MT	-0.545727	-0.00710847
bPAC-MT	-0.530735	-0.00710847
bPAC-MT	-0.515742	-0.00710847
bPAC-MT	-0.50075	-0.00710847
bPAC-MT	-0.485757	-0.00710847
bPAC-MT	-0.470765	-0.00710847
bPAC-MT	-0.455772	0.0089033
bPAC-MT	-0.44078	0.0089033
bPAC-MT	-0.425787	0.0089033
bPAC-MT	-0.410795	0.0089033
bPAC-MT	-0.395802	0.0089033
bPAC-MT	-0.38081	0.0089033
bPAC-MT	-0.365817	0.0089033
bPAC-MT	-0.350825	0.0089033
bPAC-MT	-0.335832	0.0089033
bPAC-MT	-0.32084	0.0089033
bPAC-MT	-0.305847	0.0089033
bPAC-MT	-0.290855	0.0089033
bPAC-MT	-0.275862	0.0089033
bPAC-MT	-0.26087	0.0089033
bPAC-MT	-0.245877	0.0089033
bPAC-MT	-0.230885	0.0089033
bPAC-MT	-0.215892	0.0089033
bPAC-MT	-0.2009	0.0089033
bPAC-MT	-0.185907	0.0089033
bPAC-MT	-0.170915	0.0089033
bPAC-MT	-0.155922	0.0089033
bPAC-MT	-0.14093	0.0089033
bPAC-MT	-0.125937	0.0089033
bPAC-MT	-0.110945	0.0089033
bPAC-MT	-0.095952	0.0089033
bPAC-MT	-0.08096	0.0089033
bPAC-MT	-0.065967	0.0089033
bPAC-MT	-0.050975	0.0089033
bPAC-MT	-0.035982	0.0089033
bPAC-MT	-0.02099	0.0089033
bPAC-MT	-0.005997	0.0089033
bPAC-MT	0.008995	0.0089033
bPAC-MT	0.023988	0.0089033
bPAC-MT	0.03898	0.0089033
bPAC-MT	0.053973	0.0089033
bPAC-MT	0.068965	0.0089033
bPAC-MT	0.083957	0.0089033
bPAC-MT	0.09895	0.0089033
bPAC-MT	0.113943	0.0089033
bPAC-MT	0.128935	0.0089033
bPAC-MT	0.143928	0.0089033
bPAC-MT	0.15892	0.0089033
bPAC-MT	0.173913	0.0089033
bPAC-MT	0.188905	0.0089033
bPAC-MT	0.203898	0.0089033
bPAC-MT	0.21889	0.0089033
bPAC-MT	0.233882	0.0089033
bPAC-MT	0.248875	0.0089033
bPAC-MT	0.263868	0.0089033
bPAC-MT	0.27886	0.0089033
bPAC-MT	0.293853	0.0089033
bPAC-MT	0.308845	0.0089033
bPAC-MT	0.323838	0.0089033
bPAC-MT	0.33883	0.0089033
bPAC-MT	0.353823	0.0089033
bPAC-MT	0.368815	0.0089033
bPAC-MT	0.383808	0.0089033
bPAC-MT	0.3988	0.0089033
bPAC-MT	0.413793	0.0089033
bPAC-MT	0.428785	0.0089033
bPAC-MT	0.443777	0.0089033
bPAC-MT	0.45877	0.0089033
bPAC-MT	0.473763	0.0089033
bPAC-MT	0.488755	0.0089033
bPAC-MT	0.503748	0.0089033
bPAC-MT	0.51874	0.0089033
bPAC-MT	0.533733	0.0089033
bPAC-MT	0.548725	0.0089033
bPAC-MT	0.563718	0.0089033
bPAC-MT	0.57871	0.0089033
bPAC-MT	0.593703	0.0089033
bPAC-MT	0.608695	0.0089033
bPAC-MT	0.623688	0.0089033
bPAC-MT	0.63868	0.0089033
bPAC-MT	0.653673	0.0089033
bPAC-MT	0.668665	0.0089033
bPAC-MT	0.683658	0.0089033
bPAC-MT	0.69865	0.0089033
bPAC-MT	0.713643	0.0089033
bPAC-MT	0.728635	0.0089033
bPAC-MT	0.743628	0.0089033
bPAC-MT	0.75862	0.0089033
bPAC-MT	0.773613	0.0089033
bPAC-MT	0.788605	0.0089033
bPAC-MT	0.803598	0.0089033
bPAC-MT	0.81859	0.0089033
bPAC-MT	0.833583	0.0089033
bPAC-MT	0.848575	0.0089033
bPAC-MT	0.863568	0.0089033
bPAC-MT	0.87856	0.0089033
bPAC-MT	0.893553	0.0089033
bPAC-MT	0.908545	0.0089033
bPAC-MT	0.923538	0.0089033
bPAC-MT	0.93853	0.0089033
bPAC-MT	0.953523	0.0089033
bPAC-MT	0.968515	0.0089033
bPAC-MT	0.983507	0.0089033
bPAC-MT	0.9985	0.0089033
bPAC-MT	1.01349	0.0089033
bPAC-MT	1.02848	0.0089033
bPAC-MT	1.04348	0.0089033
bPAC-MT	1.05847	0.0089033
bPAC-MT	1.07346	0.0089033
bPAC-MT	1.08846	0.0089033
bPAC-MT	1.10345	0.0089033
bPAC-MT	1.11844	0.0089033
bPAC-MT	1.13343	0.0089033
bPAC-MT	1.14843	0.0089033
bPAC-MT	1.16342	0.0089033
bPAC-MT	1.17841	0.0089033
bPAC-MT	1.1934	0.0089033
bPAC-MT	1.20839	0.0089033
bPAC-MT	1.22339	0.0089033
bPAC-MT	1.23838	0.0089033
bPAC-MT	1.25337	0.0089033
bPAC-MT	1.26837	0.0089033
bPAC-MT	1.28336	0.0089033
bPAC-MT	1.29835	0.0089033
bPAC-MT	1.31334	0.0089033
bPAC-MT	1.32834	0.0089033
bPAC-MT	1.34333	0.0089033
bPAC-MT	1.35832	0.0089033
bPAC-MT	1.37331	0.0089033
bPAC-MT	1.3883	0.0089033
bPAC-MT	1.4033	0.0089033
bPAC-MT	1.41829	0.0089033
bPAC-MT	1.43328	0.0089033
bPAC-MT	1.44828	0.0089033
bPAC-MT	1.46327	0.0089033
bPAC-MT	1.47826	0.0089033
bPAC-MT	1.49325	0.0089033
bPAC-MT	1.50825	0.0089033
bPAC-MT	1.52324	0.0089033
bPAC-MT	1.53823	0.0089033
bPAC-MT	1.55322	0.0089033
bPAC-MT	1.56821	0.0089033
bPAC-MT	1.58321	0.0089033
bPAC-MT	1.5982	0.0089033
bPAC-MT	1.61319	0.0089033
bPAC-MT	1.62819	0.0089033
bPAC-MT	1.64318	0.0089033
bPAC-MT	1.65817	0.0089033
bPAC-MT	1.67316	0.0089033
bPAC-MT	1.68816	0.0089033
bPAC-MT	1.70315	0.0089033
bPAC-MT	1.71814	0.0089033
bPAC-MT	1.73313	0.0089033
bPAC-MT	1.74812	0.0089033
bPAC-MT	1.76312	0.0089033
bPAC-MT	1.77811	0.0089033
bPAC-MT	1.7931	0.0089033
bPAC-MT	1.80809	0.0089033
bPAC-MT	1.82309	0.0089033
bPAC-MT	1.83808	0.0089033
bPAC-MT	1.85307	0.0089033
bPAC-MT	1.86807	0.0089033
bPAC-MT	1.88306	0.0089033
bPAC-MT	1.89805	0.0089033
bPAC-MT	1.91304	0.0089033
bPAC-MT	1.92803	0.0089033
bPAC-MT	1.94303	0.0089033
bPAC-MT	1.95802	0.0089033
bPAC-MT	1.97301	0.0089033
bPAC-MT	1.988	0.0089033
bPAC-MT	2.003	0.0089033
bPAC-MT	2.01799	0.0089033
bPAC-MT	2.03298	0.0089033
bPAC-MT	2.04798	0.0089033
bPAC-MT	2.06297	0.0089033
bPAC-MT	2.07796	0.0089033
bPAC-MT	2.09295	0.0089033
bPAC-MT	2.10794	0.0089033
bPAC-MT	2.12294	0.0089033
bPAC-MT	2.13793	0.0089033
bPAC-MT	2.15292	0.0089033
bPAC-MT	2.16791	0.0089033
bPAC-MT	2.18291	0.0089033
bPAC-MT	2.1979	0.0089033
bPAC-MT	2.21289	0.0089033
bPAC-MT	2.22788	0.0089033
bPAC-MT	2.24288	0.0089033
bPAC-MT	2.25787	0.0089033
bPAC-MT	2.27286	0.0089033
bPAC-MT	2.28786	0.0089033
bPAC-MT	2.30285	0.0089033
bPAC-MT	2.31784	0.0089033
bPAC-MT	2.33283	0.0089033
bPAC-MT	2.34783	0.0089033
bPAC-MT	2.36282	0.0089033
bPAC-MT	2.37781	0.0089033
bPAC-MT	2.3928	0.0089033
bPAC-MT	2.4078	0.0089033
bPAC-MT	2.42279	0.0089033
bPAC-MT	2.43778	0.0089033
bPAC-MT	2.45277	0.0089033
bPAC-MT	2.46776	0.0089033
bPAC-MT	2.48276	0.0089033
bPAC-MT	2.49775	1.21
bPAC-MT	2.51274	1.54246
bPAC-MT	2.52773	0.50491
bPAC-MT	2.54273	0.990653
bPAC-MT	2.55772	0.767771
bPAC-MT	2.57271	0.623065
bPAC-MT	2.5877	1.17083
bPAC-MT	2.6027	1.18705
bPAC-MT	2.61769	0.514367
bPAC-MT	2.63268	1.17877
bPAC-MT	2.64767	1.08734
bPAC-MT	2.66267	1.23366
bPAC-MT	2.67766	0.6935
bPAC-MT	2.69265	0.479805
bPAC-MT	2.70765	0.915103
bPAC-MT	2.72264	0.970058
bPAC-MT	2.73763	0.882426
bPAC-MT	2.75262	1.16746
bPAC-MT	2.76762	0.610681
bPAC-MT	2.78261	1.41565
bPAC-MT	2.7976	1.58769
bPAC-MT	2.81259	1.28192
bPAC-MT	2.82759	1.33956
bPAC-MT	2.84258	1.57496
bPAC-MT	2.85757	1.02158
bPAC-MT	2.87256	-0.592403
bPAC-MT	2.88755	-0.974899
bPAC-MT	2.90255	0.924862
bPAC-MT	2.91754	1.15057
bPAC-MT	2.93253	0.1034
bPAC-MT	2.94752	0.603378
bPAC-MT	2.96252	0.515309
bPAC-MT	2.97751	-0.285659
bPAC-MT	2.9925	0.341863
bPAC-MT	3.00749	0.895416
bPAC-MT	3.02249	-0.268832
bPAC-MT	3.03748	-0.405496
bPAC-MT	3.05247	0.953871
bPAC-MT	3.06747	1.05527
bPAC-MT	3.08246	-0.519949
bPAC-MT	3.09745	-0.475056
bPAC-MT	3.11244	-0.501507
bPAC-MT	3.12744	-0.345056
bPAC-MT	3.14243	0.219064
bPAC-MT	3.15742	0.156066
bPAC-MT	3.17241	-0.573928
bPAC-MT	3.18741	-0.881076
bPAC-MT	3.2024	-0.725499
bPAC-MT	3.21739	-0.945453
bPAC-MT	3.23238	-0.707495
bPAC-MT	3.24737	-0.632147
bPAC-MT	3.26237	-0.611147
bPAC-MT	3.27736	-0.518905
bPAC-MT	3.29235	-0.454259
bPAC-MT	3.30734	-0.373963
bPAC-MT	3.32234	-0.344315
bPAC-MT	3.33733	-0.300668
bPAC-MT	3.35232	-0.272669
bPAC-MT	3.36731	-0.25002
bPAC-MT	3.38231	-0.171374
bPAC-MT	3.3973	-0.106727
bPAC-MT	3.41229	-0.0857281
bPAC-MT	3.42729	-0.0367297
bPAC-MT	3.44228	-0.0157305
bPAC-MT	3.45727	0.00526881
bPAC-MT	3.47226	0.0106196
bPAC-MT	3.48726	0.0596179
bPAC-MT	3.50225	0.0806172
bPAC-MT	3.51724	0.0876169
bPAC-MT	3.53223	0.101616
bPAC-MT	3.54723	0.157614
bPAC-MT	3.56222	0.178614
bPAC-MT	3.57721	0.185613
bPAC-MT	3.5922	0.185613
bPAC-MT	3.60719	0.185613
bPAC-MT	3.62219	0.199613
bPAC-MT	3.63718	0.199613
bPAC-MT	3.65217	0.208262
bPAC-MT	3.66716	0.215262
bPAC-MT	3.68216	0.215262
bPAC-MT	3.69715	0.215262
bPAC-MT	3.71214	0.23542
bPAC-MT	3.72713	0.23542
bPAC-MT	3.74213	0.23542
bPAC-MT	3.75712	0.23542
bPAC-MT	3.77211	0.242419
bPAC-MT	3.78711	0.242419
bPAC-MT	3.8021	0.24491
bPAC-MT	3.81709	0.24491
bPAC-MT	3.83208	0.24491
bPAC-MT	3.84708	0.24491
bPAC-MT	3.86207	0.24491
bPAC-MT	3.87706	0.24491
bPAC-MT	3.89205	0.24491
bPAC-MT	3.90705	0.24491
bPAC-MT	3.92204	0.24491
bPAC-MT	3.93703	0.24491
bPAC-MT	3.95202	0.24491
bPAC-MT	3.96701	0.24491
bPAC-MT	3.98201	0.24491
bPAC-MT	3.997	0.24491
bPAC-MT	4.01199	0.24491
bPAC-MT	4.02698	0.24491
bPAC-MT	4.04198	0.24491
bPAC-MT	4.05697	0.24491
bPAC-MT	4.07196	0.24491
bPAC-MT	4.08695	0.24491
bPAC-MT	4.10195	0.24491
bPAC-MT	4.11694	0.24491
bPAC-MT	4.13193	0.24491
bPAC-MT	4.14693	0.24491
bPAC-MT	4.16192	0.229261
bPAC-MT	4.17691	0.23791
bPAC-MT	4.1919	0.246559
bPAC-MT	4.2069	0.246559
bPAC-MT	4.22189	0.246559
bPAC-MT	4.23688	0.246559
bPAC-MT	4.25187	0.246559
bPAC-MT	4.26687	0.246559
bPAC-MT	4.28186	0.246559
bPAC-MT	4.29685	0.246559
bPAC-MT	4.31184	0.246559
bPAC-MT	4.32683	0.246559
bPAC-MT	4.34183	0.246559
bPAC-MT	4.35682	0.246559
bPAC-MT	4.37181	0.246559
bPAC-MT	4.3868	0.246559
bPAC-MT	4.4018	0.246559
bPAC-MT	4.41679	0.246559
bPAC-MT	4.43178	0.246559
bPAC-MT	4.44677	0.246559
bPAC-MT	4.46177	0.246559
bPAC-MT	4.47676	0.246559
bPAC-MT	4.49175	0.246559
bPAC-MT	4.50674	0.246559
bPAC-MT	4.52174	0.246559
bPAC-MT	4.53673	0.246559
bPAC-MT	4.55172	0.246559
bPAC-MT	4.56672	0.246559
bPAC-MT	4.58171	0.246559
bPAC-MT	4.5967	0.246559
bPAC-MT	4.61169	0.246559
bPAC-MT	4.62669	0.246559
bPAC-MT	4.64168	0.246559
bPAC-MT	4.65667	0.246559
bPAC-MT	4.67166	0.246559
bPAC-MT	4.68666	0.246559
bPAC-MT	4.70165	0.246559
bPAC-MT	4.71664	0.246559
bPAC-MT	4.73163	0.246559
bPAC-MT	4.74662	0.246559
bPAC-MT	4.76162	0.246559
bPAC-MT	4.77661	0.246559
bPAC-MT	4.7916	0.248207
bPAC-MT	4.80659	0.248207
bPAC-MT	4.82159	0.248207
bPAC-MT	4.83658	0.248207
bPAC-MT	4.85157	0.234208
bPAC-MT	4.86656	0.235857
bPAC-MT	4.88156	0.235857
bPAC-MT	4.89655	0.228857
bPAC-MT	4.91154	0.228857
bPAC-MT	4.92654	0.228857
bPAC-MT	4.94153	0.228857
bPAC-MT	4.95652	0.228857
bPAC-MT	4.97151	0.228857
bPAC-MT	4.98651	0.228857
bPAC-MT	5.0015	0.228857
bPAC-MT	5.01649	0.228857
bPAC-MT	5.03148	0.228857
bPAC-MT	5.04648	0.228857
bPAC-MT	5.06147	0.228857
bPAC-MT	5.07646	0.228857
bPAC-MT	5.09145	0.228857
bPAC-MT	5.10644	0.228857
bPAC-MT	5.12144	0.228857
bPAC-MT	5.13643	0.228857
bPAC-MT	5.15142	0.228857
bPAC-MT	5.16641	0.228857
bPAC-MT	5.18141	0.228857
bPAC-MT	5.1964	0.228857
bPAC-MT	5.21139	0.228857
bPAC-MT	5.22638	0.228857
bPAC-MT	5.24138	0.228857
bPAC-MT	5.25637	0.228857
bPAC-MT	5.27136	0.228857
bPAC-MT	5.28636	0.228857
bPAC-MT	5.30135	0.228857
bPAC-MT	5.31634	0.228857
bPAC-MT	5.33133	0.228857
bPAC-MT	5.34633	0.228857
bPAC-MT	5.36132	0.228857
bPAC-MT	5.37631	0.228857
bPAC-MT	5.3913	0.228857
bPAC-MT	5.4063	0.228857
bPAC-MT	5.42129	0.228857
bPAC-MT	5.43628	0.228857
bPAC-MT	5.45127	0.228857
bPAC-MT	5.46626	0.228857
bPAC-MT	5.48126	0.228857
bPAC-MT	5.49625	0.228857
bPAC-MT	5.51124	0.228857
bPAC-MT	5.52623	0.228857
bPAC-MT	5.54123	0.228857
bPAC-MT	5.55622	0.228857
bPAC-MT	5.57121	0.228857
bPAC-MT	5.5862	0.228857
bPAC-MT	5.6012	0.228857
bPAC-MT	5.61619	0.228857
bPAC-MT	5.63118	0.228857
bPAC-MT	5.64618	0.228857
bPAC-MT	5.66117	0.228857
bPAC-MT	5.67616	0.228857
bPAC-MT	5.69115	0.228857
bPAC-MT	5.70615	0.228857
bPAC-MT	5.72114	0.228857
bPAC-MT	5.73613	0.228857
bPAC-MT	5.75112	0.228857
bPAC-MT	5.76612	0.228857
bPAC-MT	5.78111	0.228857
bPAC-MT	5.7961	0.228857
bPAC-MT	5.81109	0.228857
bPAC-MT	5.82608	0.228857
bPAC-MT	5.84108	0.228857
bPAC-MT	5.85607	0.228857
bPAC-MT	5.87106	0.228857
bPAC-MT	5.88605	0.228857
bPAC-MT	5.90105	0.228857
bPAC-MT	5.91604	0.228857
bPAC-MT	5.93103	0.228857
bPAC-MT	5.94602	0.228857
bPAC-MT	5.96102	0.228857
bPAC-MT	5.97601	0.228857
bPAC-MT	5.991	0.228857
bPAC-MT	6.006	0.228857
bPAC-MT	6.02099	0.228857
bPAC-MT	6.03598	0.228857
bPAC-MT	6.05097	0.228857
bPAC-MT	6.06597	0.228857
bPAC-MT	6.08096	0.228857
bPAC-MT	6.09595	0.228857
bPAC-MT	6.11094	0.228857
bPAC-MT	6.12594	0.228857
bPAC-MT	6.14093	0.228857
bPAC-MT	6.15592	0.228857
bPAC-MT	6.17091	0.228857
bPAC-MT	6.1859	-0.635209
bPAC-MT	6.2009	-1.55517
bPAC-MT	6.21589	-1.67525
bPAC-MT	6.23088	-0.992567
bPAC-MT	6.24587	-1.61077
bPAC-MT	6.26087	-0.72422
bPAC-MT	6.27586	-1.35642
bPAC-MT	6.29085	-1.35531
bPAC-MT	6.30584	-1.46094
bPAC-MT	6.32084	-0.694135
bPAC-MT	6.33583	-0.191061
bPAC-MT	6.35082	-1.11439
bPAC-MT	6.36581	-1.31415
bPAC-MT	6.38081	-1.23066
bPAC-MT	6.3958	-1.67723
bPAC-MT	6.41079	-1.133
bPAC-MT	6.42578	-1.18526
bPAC-MT	6.44078	-1.06357
bPAC-MT	6.45577	-0.546803
bPAC-MT	6.47076	-0.483099
bPAC-MT	6.48575	-1.1787
bPAC-MT	6.50075	-1.13956
bPAC-MT	6.51574	-1.54999
bPAC-MT	6.53073	-1.27912
bPAC-MT	6.54572	-1.04604
bPAC-MT	6.56072	-1.30739
bPAC-MT	6.57571	-1.67881
bPAC-MT	6.5907	-1.79586
bPAC-MT	6.6057	-1.8984
bPAC-MT	6.62069	-1.87699
bPAC-MT	6.63568	-1.828
bPAC-MT	6.65067	-1.73128
bPAC-MT	6.66567	-1.67905
bPAC-MT	6.68066	-1.60743
bPAC-MT	6.69565	-1.51112
bPAC-MT	6.71064	-1.3934
bPAC-MT	6.72564	-1.34606
bPAC-MT	6.74063	-1.253
bPAC-MT	6.75562	-1.253
bPAC-MT	6.77061	-1.253
bPAC-MT	6.78561	-1.17066
bPAC-MT	6.8006	-1.08461
bPAC-MT	6.81559	-1.08461
bPAC-MT	6.83058	-1.03026
bPAC-MT	6.84558	-0.988259
bPAC-MT	6.86057	-0.905911
bPAC-MT	6.87556	-0.86186
bPAC-MT	6.89055	-0.82151
bPAC-MT	6.90555	-0.814511
bPAC-MT	6.92054	-0.774161
bPAC-MT	6.93553	-0.740811
bPAC-MT	6.95052	-0.728461
bPAC-MT	6.96551	-0.694707
bPAC-MT	6.98051	-0.663006
bPAC-MT	6.9955	-0.638305
bPAC-MT	7.01049	-0.611955
bPAC-MT	7.02548	-0.590956
bPAC-MT	7.04048	-0.585605
bPAC-MT	7.05547	-0.569149
bPAC-MT	7.07046	-0.555149
bPAC-MT	7.08545	-0.52015
bPAC-MT	7.10045	-0.471152
bPAC-MT	7.11544	-0.450153
bPAC-MT	7.13043	-0.436153
bPAC-MT	7.14542	-0.436153
bPAC-MT	7.16042	-0.436153
bPAC-MT	7.17541	-0.436153
bPAC-MT	7.1904	-0.436153
bPAC-MT	7.20539	-0.437802
bPAC-MT	7.22039	-0.425452
bPAC-MT	7.23538	-0.404453
bPAC-MT	7.25037	-0.371507
bPAC-MT	7.26536	-0.371507
bPAC-MT	7.28036	-0.371507
bPAC-MT	7.29535	-0.371507
bPAC-MT	7.31034	-0.364507
bPAC-MT	7.32534	-0.30686
bPAC-MT	7.34033	-0.30686
bPAC-MT	7.35532	-0.30686
bPAC-MT	7.37031	-0.30686
bPAC-MT	7.38531	-0.30686
bPAC-MT	7.4003	-0.30686
bPAC-MT	7.41529	-0.30686
bPAC-MT	7.43028	-0.30686
bPAC-MT	7.44528	-0.30686
bPAC-MT	7.46027	-0.284212
bPAC-MT	7.47526	-0.275563
bPAC-MT	7.49025	-0.275563
bPAC-MT	7.50525	-0.265265
bPAC-MT	7.52024	-0.263616
bPAC-MT	7.53523	-0.246319
bPAC-MT	7.55022	-0.239319
bPAC-MT	7.56522	-0.23767
bPAC-MT	7.58021	-0.23767
bPAC-MT	7.5952	-0.23067
bPAC-MT	7.61019	-0.22367
bPAC-MT	7.62519	-0.209671
bPAC-MT	7.64018	-0.201022
bPAC-MT	7.65517	-0.194022
bPAC-MT	7.67016	-0.194022
bPAC-MT	7.68515	-0.194022
bPAC-MT	7.70015	-0.194022
bPAC-MT	7.71514	-0.194022
bPAC-MT	7.73013	-0.194022
bPAC-MT	7.74512	-0.192373
bPAC-MT	7.76012	-0.185374
bPAC-MT	7.77511	-0.185374
bPAC-MT	7.7901	-0.176725
bPAC-MT	7.80509	-0.161076
bPAC-MT	7.82009	-0.161076
bPAC-MT	7.83508	-0.161076
bPAC-MT	7.85007	-0.154077
bPAC-MT	7.86506	-0.147077
bPAC-MT	7.88006	-0.147077
bPAC-MT	7.89505	-0.147077
bPAC-MT	7.91004	-0.147077
bPAC-MT	7.92503	-0.143375
bPAC-MT	7.94003	-0.143375
bPAC-MT	7.95502	-0.143375
bPAC-MT	7.97001	-0.143375
bPAC-MT	7.985	-0.143375
bPAC-MT	8	-0.143375
OaPAC-Flag	-1.0105	-0.0160267
OaPAC-Flag	-0.995502	-0.0160267
OaPAC-Flag	-0.98051	-0.0160267
OaPAC-Flag	-0.965518	-0.0160267
OaPAC-Flag	-0.950525	-0.0160267
OaPAC-Flag	-0.935533	-0.0160267
OaPAC-Flag	-0.92054	-0.0160267
OaPAC-Flag	-0.905548	-0.0160267
OaPAC-Flag	-0.890555	-0.0160267
OaPAC-Flag	-0.875563	-0.0160267
OaPAC-Flag	-0.86057	-0.0160267
OaPAC-Flag	-0.845578	-0.0160267
OaPAC-Flag	-0.830585	-0.0160267
OaPAC-Flag	-0.815592	-0.0160267
OaPAC-Flag	-0.8006	-0.0160267
OaPAC-Flag	-0.785608	-0.0160267
OaPAC-Flag	-0.770615	-0.0160267
OaPAC-Flag	-0.755622	-0.0160267
OaPAC-Flag	-0.74063	-0.0160267
OaPAC-Flag	-0.725637	-0.02973
OaPAC-Flag	-0.710645	-0.02973
OaPAC-Flag	-0.695653	-0.02973
OaPAC-Flag	-0.68066	-0.02973
OaPAC-Flag	-0.665668	-0.02973
OaPAC-Flag	-0.650675	-0.02973
OaPAC-Flag	-0.635683	-0.02973
OaPAC-Flag	-0.62069	-0.02973
OaPAC-Flag	-0.605697	-0.02973
OaPAC-Flag	-0.590705	-0.02973
OaPAC-Flag	-0.575713	-0.02973
OaPAC-Flag	-0.56072	-0.02973
OaPAC-Flag	-0.545727	-0.02973
OaPAC-Flag	-0.530735	-0.02973
OaPAC-Flag	-0.515742	-0.02973
OaPAC-Flag	-0.50075	-0.02973
OaPAC-Flag	-0.485757	-0.02973
OaPAC-Flag	-0.470765	-0.02973
OaPAC-Flag	-0.455773	-0.02973
OaPAC-Flag	-0.44078	-0.02973
OaPAC-Flag	-0.425788	-0.02973
OaPAC-Flag	-0.410795	-0.02973
OaPAC-Flag	-0.395803	-0.02973
OaPAC-Flag	-0.38081	-0.02973
OaPAC-Flag	-0.365818	-0.02973
OaPAC-Flag	-0.350825	-0.02973
OaPAC-Flag	-0.335832	-0.02973
OaPAC-Flag	-0.32084	-0.02973
OaPAC-Flag	-0.305848	-0.02973
OaPAC-Flag	-0.290855	-0.02973
OaPAC-Flag	-0.275862	-0.0228783
OaPAC-Flag	-0.26087	-0.0228783
OaPAC-Flag	-0.245877	-0.0228783
OaPAC-Flag	-0.230885	-0.0228783
OaPAC-Flag	-0.215892	-0.0228783
OaPAC-Flag	-0.2009	-0.0228783
OaPAC-Flag	-0.185908	-0.0228783
OaPAC-Flag	-0.170915	-0.0228783
OaPAC-Flag	-0.155923	-0.0228783
OaPAC-Flag	-0.14093	-0.0228783
OaPAC-Flag	-0.125938	-0.0228783
OaPAC-Flag	-0.110945	-0.0228783
OaPAC-Flag	-0.095953	-0.0228783
OaPAC-Flag	-0.08096	-0.0228783
OaPAC-Flag	-0.065967	-0.0228783
OaPAC-Flag	-0.050975	-0.0228783
OaPAC-Flag	-0.035983	-0.0228783
OaPAC-Flag	-0.02099	-0.0228783
OaPAC-Flag	-0.005997	-0.0228783
OaPAC-Flag	0.008995	-0.0228783
OaPAC-Flag	0.023988	-0.0228783
OaPAC-Flag	0.03898	-0.0228783
OaPAC-Flag	0.053972	-0.0228783
OaPAC-Flag	0.068965	-0.0228783
OaPAC-Flag	0.083957	-0.0228783
OaPAC-Flag	0.09895	-0.0228783
OaPAC-Flag	0.113943	-0.0228783
OaPAC-Flag	0.128935	-0.0228783
OaPAC-Flag	0.143927	-0.0228783
OaPAC-Flag	0.15892	-0.0228783
OaPAC-Flag	0.173912	-0.0228783
OaPAC-Flag	0.188905	-0.0228783
OaPAC-Flag	0.203898	-0.0228783
OaPAC-Flag	0.21889	-0.0228783
OaPAC-Flag	0.233882	-0.0228783
OaPAC-Flag	0.248875	-0.0228783
OaPAC-Flag	0.263867	-0.0228783
OaPAC-Flag	0.27886	-0.0228783
OaPAC-Flag	0.293852	-0.0228783
OaPAC-Flag	0.308845	-0.0228783
OaPAC-Flag	0.323838	-0.0228783
OaPAC-Flag	0.33883	-0.0228783
OaPAC-Flag	0.353822	-0.0228783
OaPAC-Flag	0.368815	-0.0228783
OaPAC-Flag	0.383808	-0.0228783
OaPAC-Flag	0.3988	-0.0228783
OaPAC-Flag	0.413793	-0.0228783
OaPAC-Flag	0.428785	-0.0228783
OaPAC-Flag	0.443777	-0.0228783
OaPAC-Flag	0.45877	-0.0228783
OaPAC-Flag	0.473762	-0.0228783
OaPAC-Flag	0.488755	-0.0228783
OaPAC-Flag	0.503747	-0.0228783
OaPAC-Flag	0.51874	-0.0228783
OaPAC-Flag	0.533733	-0.0228783
OaPAC-Flag	0.548725	-0.0228783
OaPAC-Flag	0.563717	-0.0228783
OaPAC-Flag	0.57871	-0.0228783
OaPAC-Flag	0.593703	-0.0228783
OaPAC-Flag	0.608695	-0.0228783
OaPAC-Flag	0.623687	-0.0228783
OaPAC-Flag	0.63868	-0.0228783
OaPAC-Flag	0.653673	-0.0228783
OaPAC-Flag	0.668665	-0.0228783
OaPAC-Flag	0.683657	-0.0228783
OaPAC-Flag	0.69865	-0.0228783
OaPAC-Flag	0.713642	-0.0228783
OaPAC-Flag	0.728635	-0.0228783
OaPAC-Flag	0.743628	-0.0228783
OaPAC-Flag	0.75862	-0.0228783
OaPAC-Flag	0.773612	-0.0228783
OaPAC-Flag	0.788605	-0.0228783
OaPAC-Flag	0.803597	-0.0228783
OaPAC-Flag	0.81859	-0.0228783
OaPAC-Flag	0.833582	-0.0228783
OaPAC-Flag	0.848575	-0.0228783
OaPAC-Flag	0.863568	-0.0228783
OaPAC-Flag	0.87856	-0.0228783
OaPAC-Flag	0.893552	-0.0228783
OaPAC-Flag	0.908545	-0.0228783
OaPAC-Flag	0.923538	-0.0228783
OaPAC-Flag	0.93853	-0.0228783
OaPAC-Flag	0.953523	-0.0228783
OaPAC-Flag	0.968515	-0.0228783
OaPAC-Flag	0.983507	-0.0228783
OaPAC-Flag	0.9985	-0.0228783
OaPAC-Flag	1.01349	-0.0228783
OaPAC-Flag	1.02848	-0.0228783
OaPAC-Flag	1.04348	-0.0228783
OaPAC-Flag	1.05847	-0.0228783
OaPAC-Flag	1.07346	-0.0228783
OaPAC-Flag	1.08846	-0.0228783
OaPAC-Flag	1.10345	-0.0228783
OaPAC-Flag	1.11844	-0.0228783
OaPAC-Flag	1.13343	-0.0228783
OaPAC-Flag	1.14843	-0.0228783
OaPAC-Flag	1.16342	-0.0228783
OaPAC-Flag	1.17841	-0.0228783
OaPAC-Flag	1.1934	-0.0228783
OaPAC-Flag	1.20839	-0.0228783
OaPAC-Flag	1.22339	-0.0228783
OaPAC-Flag	1.23838	-0.0228783
OaPAC-Flag	1.25337	-0.0228783
OaPAC-Flag	1.26837	-0.0228783
OaPAC-Flag	1.28336	-0.0228783
OaPAC-Flag	1.29835	-0.0228783
OaPAC-Flag	1.31334	-0.0228783
OaPAC-Flag	1.32834	-0.0228783
OaPAC-Flag	1.34333	-0.0228783
OaPAC-Flag	1.35832	-0.0228783
OaPAC-Flag	1.37331	-0.0228783
OaPAC-Flag	1.3883	-0.0228783
OaPAC-Flag	1.4033	-0.0228783
OaPAC-Flag	1.41829	-0.0228783
OaPAC-Flag	1.43328	-0.0228783
OaPAC-Flag	1.44828	-0.0228783
OaPAC-Flag	1.46327	-0.0228783
OaPAC-Flag	1.47826	-0.0228783
OaPAC-Flag	1.49325	-0.0228783
OaPAC-Flag	1.50825	-0.0228783
OaPAC-Flag	1.52324	-0.0228783
OaPAC-Flag	1.53823	-0.0228783
OaPAC-Flag	1.55322	-0.0228783
OaPAC-Flag	1.56821	-0.0228783
OaPAC-Flag	1.58321	-0.0228783
OaPAC-Flag	1.5982	-0.0228783
OaPAC-Flag	1.61319	-0.0228783
OaPAC-Flag	1.62819	-0.0228783
OaPAC-Flag	1.64318	-0.0228783
OaPAC-Flag	1.65817	-0.0228783
OaPAC-Flag	1.67316	-0.0228783
OaPAC-Flag	1.68816	-0.0228783
OaPAC-Flag	1.70315	-0.0228783
OaPAC-Flag	1.71814	-0.0228783
OaPAC-Flag	1.73313	-0.0228783
OaPAC-Flag	1.74812	-0.0228783
OaPAC-Flag	1.76312	-0.0228783
OaPAC-Flag	1.77811	-0.0228783
OaPAC-Flag	1.7931	-0.0228783
OaPAC-Flag	1.80809	-0.0228783
OaPAC-Flag	1.82309	-0.0228783
OaPAC-Flag	1.83808	-0.0228783
OaPAC-Flag	1.85307	-0.0228783
OaPAC-Flag	1.86807	-0.0228783
OaPAC-Flag	1.88306	-0.0228783
OaPAC-Flag	1.89805	-0.0228783
OaPAC-Flag	1.91304	-0.0228783
OaPAC-Flag	1.92803	-0.0228783
OaPAC-Flag	1.94303	-0.0228783
OaPAC-Flag	1.95802	-0.0228783
OaPAC-Flag	1.97301	-0.0228783
OaPAC-Flag	1.988	-0.0228783
OaPAC-Flag	2.003	-0.0228783
OaPAC-Flag	2.01799	-0.0228783
OaPAC-Flag	2.03298	-0.0228783
OaPAC-Flag	2.04798	-0.0228783
OaPAC-Flag	2.06297	-0.0228783
OaPAC-Flag	2.07796	-0.0228783
OaPAC-Flag	2.09295	-0.0228783
OaPAC-Flag	2.10794	-0.0228783
OaPAC-Flag	2.12294	-0.0228783
OaPAC-Flag	2.13793	-0.0228783
OaPAC-Flag	2.15292	-0.0228783
OaPAC-Flag	2.16791	-0.0228783
OaPAC-Flag	2.18291	-0.0228783
OaPAC-Flag	2.1979	-0.0228783
OaPAC-Flag	2.21289	-0.0228783
OaPAC-Flag	2.22788	-0.0228783
OaPAC-Flag	2.24288	-0.0228783
OaPAC-Flag	2.25787	-0.0228783
OaPAC-Flag	2.27286	-0.0228783
OaPAC-Flag	2.28786	-0.0228783
OaPAC-Flag	2.30285	-0.0228783
OaPAC-Flag	2.31784	-0.0228783
OaPAC-Flag	2.33283	-0.0228783
OaPAC-Flag	2.34783	-0.0228783
OaPAC-Flag	2.36282	-0.0228783
OaPAC-Flag	2.37781	-0.0228783
OaPAC-Flag	2.3928	-0.0228783
OaPAC-Flag	2.4078	-0.0228783
OaPAC-Flag	2.42279	-0.0228783
OaPAC-Flag	2.43778	-0.0228783
OaPAC-Flag	2.45277	-0.0228783
OaPAC-Flag	2.46776	-0.0228783
OaPAC-Flag	2.48276	-0.0228783
OaPAC-Flag	2.49775	-0.0228783
OaPAC-Flag	2.51274	-0.0228783
OaPAC-Flag	2.52773	-0.0228783
OaPAC-Flag	2.54273	-0.0228783
OaPAC-Flag	2.55772	-0.0228783
OaPAC-Flag	2.57271	-0.0228783
OaPAC-Flag	2.5877	-0.0228783
OaPAC-Flag	2.6027	-0.0228783
OaPAC-Flag	2.61769	-0.0228783
OaPAC-Flag	2.63268	-0.0228783
OaPAC-Flag	2.64767	-0.0228783
OaPAC-Flag	2.66267	-0.0228783
OaPAC-Flag	2.67766	-0.0228783
OaPAC-Flag	2.69265	-0.0228783
OaPAC-Flag	2.70765	-0.0228783
OaPAC-Flag	2.72264	-0.0228783
OaPAC-Flag	2.73763	-0.0228783
OaPAC-Flag	2.75262	-0.0228783
OaPAC-Flag	2.76762	-0.0228783
OaPAC-Flag	2.78261	-0.0228783
OaPAC-Flag	2.7976	-0.0228783
OaPAC-Flag	2.81259	-0.0228783
OaPAC-Flag	2.82759	-0.0228783
OaPAC-Flag	2.84258	-0.0228783
OaPAC-Flag	2.85757	-0.0228783
OaPAC-Flag	2.87256	-0.0228783
OaPAC-Flag	2.88755	-0.0228783
OaPAC-Flag	2.90255	-0.0228783
OaPAC-Flag	2.91754	-0.0228783
OaPAC-Flag	2.93253	-0.0228783
OaPAC-Flag	2.94752	-0.0228783
OaPAC-Flag	2.96252	-0.0228783
OaPAC-Flag	2.97751	-0.0228783
OaPAC-Flag	2.9925	-0.0228783
OaPAC-Flag	3.00749	-0.0228783
OaPAC-Flag	3.02249	-0.0228783
OaPAC-Flag	3.03748	-0.0228783
OaPAC-Flag	3.05247	-0.0228783
OaPAC-Flag	3.06747	-0.0228783
OaPAC-Flag	3.08246	-0.0228783
OaPAC-Flag	3.09745	-0.0228783
OaPAC-Flag	3.11244	-0.0228783
OaPAC-Flag	3.12744	-0.0228783
OaPAC-Flag	3.14243	-0.0228783
OaPAC-Flag	3.15742	-0.0228783
OaPAC-Flag	3.17241	-0.0228783
OaPAC-Flag	3.18741	-0.0228783
OaPAC-Flag	3.2024	-0.0228783
OaPAC-Flag	3.21739	-0.0228783
OaPAC-Flag	3.23238	-0.0228783
OaPAC-Flag	3.24737	-0.0228783
OaPAC-Flag	3.26237	-0.0228783
OaPAC-Flag	3.27736	-0.0228783
OaPAC-Flag	3.29235	-0.0228783
OaPAC-Flag	3.30734	-0.0228783
OaPAC-Flag	3.32234	-0.0228783
OaPAC-Flag	3.33733	-0.0228783
OaPAC-Flag	3.35232	-0.0228783
OaPAC-Flag	3.36731	-0.0228783
OaPAC-Flag	3.38231	-0.0228783
OaPAC-Flag	3.3973	-0.0228783
OaPAC-Flag	3.41229	-0.0228783
OaPAC-Flag	3.42729	-0.0228783
OaPAC-Flag	3.44228	-0.0228783
OaPAC-Flag	3.45727	-0.0228783
OaPAC-Flag	3.47226	-0.0228783
OaPAC-Flag	3.48726	-0.0228783
OaPAC-Flag	3.50225	-0.0228783
OaPAC-Flag	3.51724	-0.0228783
OaPAC-Flag	3.53223	-0.0228783
OaPAC-Flag	3.54723	-0.0228783
OaPAC-Flag	3.56222	-0.0228783
OaPAC-Flag	3.57721	-0.0228783
OaPAC-Flag	3.5922	-0.0228783
OaPAC-Flag	3.60719	-0.0228783
OaPAC-Flag	3.62219	-0.0228783
OaPAC-Flag	3.63718	-0.0228783
OaPAC-Flag	3.65217	-0.0228783
OaPAC-Flag	3.66716	-0.0228783
OaPAC-Flag	3.68216	-0.0228783
OaPAC-Flag	3.69715	-0.0228783
OaPAC-Flag	3.71214	-0.0228783
OaPAC-Flag	3.72713	-0.0228783
OaPAC-Flag	3.74213	-0.0228783
OaPAC-Flag	3.75712	-0.0228783
OaPAC-Flag	3.77211	-0.0228783
OaPAC-Flag	3.78711	-0.0228783
OaPAC-Flag	3.8021	-0.0228783
OaPAC-Flag	3.81709	-0.0228783
OaPAC-Flag	3.83208	-0.0228783
OaPAC-Flag	3.84708	-0.0228783
OaPAC-Flag	3.86207	-0.0228783
OaPAC-Flag	3.87706	-0.0228783
OaPAC-Flag	3.89205	-0.0228783
OaPAC-Flag	3.90705	-0.0228783
OaPAC-Flag	3.92204	-0.0228783
OaPAC-Flag	3.93703	-1.03532
OaPAC-Flag	3.95202	0.229598
OaPAC-Flag	3.96701	-1.70792
OaPAC-Flag	3.98201	0.271465
OaPAC-Flag	3.997	0.847324
OaPAC-Flag	4.01199	1.14245
OaPAC-Flag	4.02698	1.17498
OaPAC-Flag	4.04198	0.69965
OaPAC-Flag	4.05697	1.13352
OaPAC-Flag	4.07196	0.412099
OaPAC-Flag	4.08695	0.872996
OaPAC-Flag	4.10195	0.32227
OaPAC-Flag	4.11694	0.527411
OaPAC-Flag	4.13193	0.292589
OaPAC-Flag	4.14693	0.0880163
OaPAC-Flag	4.16192	0.482511
OaPAC-Flag	4.17691	-0.183338
OaPAC-Flag	4.1919	0.424855
OaPAC-Flag	4.2069	-0.17497
OaPAC-Flag	4.22189	0.291262
OaPAC-Flag	4.23688	0.340929
OaPAC-Flag	4.25187	-0.202756
OaPAC-Flag	4.26687	0.339413
OaPAC-Flag	4.28186	-0.231679
OaPAC-Flag	4.29685	0.155556
OaPAC-Flag	4.31184	0.422581
OaPAC-Flag	4.32683	-0.423496
OaPAC-Flag	4.34183	0.359021
OaPAC-Flag	4.35682	-0.217975
OaPAC-Flag	4.37181	0.465017
OaPAC-Flag	4.3868	-0.315793
OaPAC-Flag	4.4018	0.264264
OaPAC-Flag	4.41679	0.43401
OaPAC-Flag	4.43178	-0.334045
OaPAC-Flag	4.44677	0.564162
OaPAC-Flag	4.46177	-0.190758
OaPAC-Flag	4.47676	0.861159
OaPAC-Flag	4.49175	-0.19761
OaPAC-Flag	4.50674	0.341309
OaPAC-Flag	4.52174	-0.0469028
OaPAC-Flag	4.53673	0.272224
OaPAC-Flag	4.55172	0.4043
OaPAC-Flag	4.56672	-0.260033
OaPAC-Flag	4.58171	0.324004
OaPAC-Flag	4.5967	-0.350431
OaPAC-Flag	4.61169	0.313333
OaPAC-Flag	4.62669	-0.277934
OaPAC-Flag	4.64168	0.164521
OaPAC-Flag	4.65667	0.428864
OaPAC-Flag	4.67166	-0.35804
OaPAC-Flag	4.68666	0.303639
OaPAC-Flag	4.70165	-0.38829
OaPAC-Flag	4.71664	0.252456
OaPAC-Flag	4.73163	0.1278
OaPAC-Flag	4.74662	-0.358798
OaPAC-Flag	4.76162	0.296029
OaPAC-Flag	4.77661	-0.197989
OaPAC-Flag	4.7916	0.267107
OaPAC-Flag	4.80659	-0.183148
OaPAC-Flag	4.82159	0.190222
OaPAC-Flag	4.83658	0.231143
OaPAC-Flag	4.85157	-0.353273
OaPAC-Flag	4.86656	0.266917
OaPAC-Flag	4.88156	-0.401803
OaPAC-Flag	4.89655	0.295271
OaPAC-Flag	4.91154	-0.164678
OaPAC-Flag	4.92654	-0.317499
OaPAC-Flag	4.94153	0.365872
OaPAC-Flag	4.95652	-0.282104
OaPAC-Flag	4.97151	0.324763
OaPAC-Flag	4.98651	-0.260791
OaPAC-Flag	5.0015	-0.442155
OaPAC-Flag	5.01649	0.182423
OaPAC-Flag	5.03148	-0.275821
OaPAC-Flag	5.04648	0.182992
OaPAC-Flag	5.06147	-0.119399
OaPAC-Flag	5.07646	0.835298
OaPAC-Flag	5.09145	1.15746
OaPAC-Flag	5.10644	0.623115
OaPAC-Flag	5.12144	1.05585
OaPAC-Flag	5.13643	-0.0834352
OaPAC-Flag	5.15142	0.575372
OaPAC-Flag	5.16641	-0.152331
OaPAC-Flag	5.18141	0.299441
OaPAC-Flag	5.1964	-0.215322
OaPAC-Flag	5.21139	0.26594
OaPAC-Flag	5.22638	-0.194578
OaPAC-Flag	5.24138	0.108382
OaPAC-Flag	5.25637	0.329151
OaPAC-Flag	5.27136	-0.292556
OaPAC-Flag	5.28636	0.293755
OaPAC-Flag	5.30135	-0.320721
OaPAC-Flag	5.31634	0.444841
OaPAC-Flag	5.33133	1.3519
OaPAC-Flag	5.34633	1.80209
OaPAC-Flag	5.36132	2.06868
OaPAC-Flag	5.37631	1.59571
OaPAC-Flag	5.3913	1.59436
OaPAC-Flag	5.4063	0.782977
OaPAC-Flag	5.42129	1.02942
OaPAC-Flag	5.43628	0.376325
OaPAC-Flag	5.45127	0.547397
OaPAC-Flag	5.46626	0.698891
OaPAC-Flag	5.48126	-0.0383164
OaPAC-Flag	5.49625	0.528198
OaPAC-Flag	5.51124	-0.123189
OaPAC-Flag	5.52623	0.465207
OaPAC-Flag	5.54123	0.0397049
OaPAC-Flag	5.55622	-0.213777
OaPAC-Flag	5.57121	0.28823
OaPAC-Flag	5.5862	-0.0916134
OaPAC-Flag	5.6012	0.218197
OaPAC-Flag	5.61619	-0.134239
OaPAC-Flag	5.63118	0.161679
OaPAC-Flag	5.64618	0.365304
OaPAC-Flag	5.66117	-0.199316
OaPAC-Flag	5.67616	0.167393
OaPAC-Flag	5.69115	-0.113684
OaPAC-Flag	5.70615	0.103265
OaPAC-Flag	5.72114	0.342096
OaPAC-Flag	5.73613	-0.0520197
OaPAC-Flag	5.75112	0.200704
OaPAC-Flag	5.76612	0.335434
OaPAC-Flag	5.78111	-0.0103413
OaPAC-Flag	5.7961	0.0305791
OaPAC-Flag	5.81109	0.220501
OaPAC-Flag	5.82608	0.114315
OaPAC-Flag	5.84108	0.114315
OaPAC-Flag	5.85607	0.0791092
OaPAC-Flag	5.87106	0.0791092
OaPAC-Flag	5.88605	0.0791092
OaPAC-Flag	5.90105	0.0791092
OaPAC-Flag	5.91604	0.0791092
OaPAC-Flag	5.93103	0.0791092
OaPAC-Flag	5.94602	0.0791092
OaPAC-Flag	5.96102	0.0791092
OaPAC-Flag	5.97601	0.0791092
OaPAC-Flag	5.991	0.0791092
OaPAC-Flag	6.006	0.0791092
OaPAC-Flag	6.02099	0.0791092
OaPAC-Flag	6.03598	0.0791092
OaPAC-Flag	6.05097	0.0791092
OaPAC-Flag	6.06597	0.0791092
OaPAC-Flag	6.08096	0.0791092
OaPAC-Flag	6.09595	0.0791092
OaPAC-Flag	6.11094	0.0791092
OaPAC-Flag	6.12594	0.0791092
OaPAC-Flag	6.14093	0.0791092
OaPAC-Flag	6.15592	0.0791092
OaPAC-Flag	6.17091	0.0791092
OaPAC-Flag	6.1859	0.0791092
OaPAC-Flag	6.2009	0.0791092
OaPAC-Flag	6.21589	0.0791092
OaPAC-Flag	6.23088	0.0791092
OaPAC-Flag	6.24587	0.0791092
OaPAC-Flag	6.26087	0.0791092
OaPAC-Flag	6.27586	0.0791092
OaPAC-Flag	6.29085	0.0791092
OaPAC-Flag	6.30584	0.0791092
OaPAC-Flag	6.32084	0.0791092
OaPAC-Flag	6.33583	0.0791092
OaPAC-Flag	6.35082	0.0791092
OaPAC-Flag	6.36581	0.0791092
OaPAC-Flag	6.38081	0.0791092
OaPAC-Flag	6.3958	0.0791092
OaPAC-Flag	6.41079	0.0791092
OaPAC-Flag	6.42578	0.0791092
OaPAC-Flag	6.44078	0.0791092
OaPAC-Flag	6.45577	0.072068
OaPAC-Flag	6.47076	0.072068
OaPAC-Flag	6.48575	0.072068
OaPAC-Flag	6.50075	0.072068
OaPAC-Flag	6.51574	0.072068
OaPAC-Flag	6.53073	0.072068
OaPAC-Flag	6.54572	1.96306
OaPAC-Flag	6.56072	2.2801
OaPAC-Flag	6.57571	1.48281
OaPAC-Flag	6.5907	1.90671
OaPAC-Flag	6.6057	1.36406
OaPAC-Flag	6.62069	1.27924
OaPAC-Flag	6.63568	-1.04191
OaPAC-Flag	6.65067	-1.71258
OaPAC-Flag	6.66567	-1.26717
OaPAC-Flag	6.68066	-1.17393
OaPAC-Flag	6.69565	-0.736207
OaPAC-Flag	6.71064	-0.786822
OaPAC-Flag	6.72564	-0.488032
OaPAC-Flag	6.74063	-0.501167
OaPAC-Flag	6.75562	-0.291259
OaPAC-Flag	6.77061	-0.180874
OaPAC-Flag	6.78561	-0.350052
OaPAC-Flag	6.8006	-0.132534
OaPAC-Flag	6.81559	-0.308563
OaPAC-Flag	6.83058	-0.0625012
OaPAC-Flag	6.84558	0.0646186
OaPAC-Flag	6.86057	-0.146616
OaPAC-Flag	6.87556	0.113149
OaPAC-Flag	6.89055	-0.210934
OaPAC-Flag	6.90555	0.0566299
OaPAC-Flag	6.92054	0.0425476
OaPAC-Flag	6.93553	0.0425476
OaPAC-Flag	6.95052	0.014383
OaPAC-Flag	6.96551	-0.000267883
OaPAC-Flag	6.98051	-0.092561
OaPAC-Flag	6.9955	-0.092561
OaPAC-Flag	7.01049	-0.092561
OaPAC-Flag	7.02548	-0.09294
OaPAC-Flag	7.04048	-0.04441
OaPAC-Flag	7.05547	-0.0109098
OaPAC-Flag	7.07046	-0.0109098
OaPAC-Flag	7.08545	-0.0109098
OaPAC-Flag	7.10045	-0.0109098
OaPAC-Flag	7.11544	-0.0109098
OaPAC-Flag	7.13043	-0.0109098
OaPAC-Flag	7.14542	-0.0109098
OaPAC-Flag	7.16042	-0.0109098
OaPAC-Flag	7.17541	-0.0109098
OaPAC-Flag	7.1904	-0.0109098
OaPAC-Flag	7.20539	-0.0109098
OaPAC-Flag	7.22039	-0.0109098
OaPAC-Flag	7.23538	-0.0109098
OaPAC-Flag	7.25037	-0.0109098
OaPAC-Flag	7.26536	-0.0109098
OaPAC-Flag	7.28036	-0.0109098
OaPAC-Flag	7.29535	-0.0109098
OaPAC-Flag	7.31034	-0.0109098
OaPAC-Flag	7.32534	-0.0109098
OaPAC-Flag	7.34033	-0.0109098
OaPAC-Flag	7.35532	-0.0109098
OaPAC-Flag	7.37031	-0.0109098
OaPAC-Flag	7.38531	-0.0326018
OaPAC-Flag	7.4003	-0.0333599
OaPAC-Flag	7.41529	-0.0268873
OaPAC-Flag	7.43028	-0.0268873
OaPAC-Flag	7.44528	-0.0268873
OaPAC-Flag	7.46027	-0.0268873
OaPAC-Flag	7.47526	-0.0268873
OaPAC-Flag	7.49025	-0.0268873
OaPAC-Flag	7.50525	-0.0268873
OaPAC-Flag	7.52024	-0.0268873
OaPAC-Flag	7.53523	-0.0268873
OaPAC-Flag	7.55022	-0.0268873
OaPAC-Flag	7.56522	-0.0268873
OaPAC-Flag	7.58021	-0.0268873
OaPAC-Flag	7.5952	-0.0268873
OaPAC-Flag	7.61019	-0.0268873
OaPAC-Flag	7.62519	-0.0268873
OaPAC-Flag	7.64018	-0.0268873
OaPAC-Flag	7.65517	-0.0268873
OaPAC-Flag	7.67016	-0.0268873
OaPAC-Flag	7.68515	-0.0268873
OaPAC-Flag	7.70015	-0.0268873
OaPAC-Flag	7.71514	-0.0268873
OaPAC-Flag	7.73013	-0.0268873
OaPAC-Flag	7.74512	-0.0268873
OaPAC-Flag	7.76012	-0.0268873
OaPAC-Flag	7.77511	-0.0268873
OaPAC-Flag	7.7901	-0.0268873
OaPAC-Flag	7.80509	-0.0268873
OaPAC-Flag	7.82009	-0.0268873
OaPAC-Flag	7.83508	-0.0268873
OaPAC-Flag	7.85007	-0.0268873
OaPAC-Flag	7.86506	-0.0268873
OaPAC-Flag	7.88006	-0.0268873
OaPAC-Flag	7.89505	-0.0268873
OaPAC-Flag	7.91004	-0.0268873
OaPAC-Flag	7.92503	-0.0268873
OaPAC-Flag	7.94003	-0.0268873
OaPAC-Flag	7.95502	-0.0268873
OaPAC-Flag	7.97001	-0.0268873
OaPAC-Flag	7.985	-0.0268873
OaPAC-Flag	8	-0.0268873

## Sheet: C
Line	UAS:opto-tool or control	sample number	trial number	yes:tail moved not included: tail moved before the light no: tail not moved
bPAC-MT	UAS:opto-tool	1	1	no
bPAC-MT	UAS:opto-tool	1	2	yes
bPAC-MT	UAS:opto-tool	1	3	yes
bPAC-MT	UAS:opto-tool	1	4	yes
bPAC-MT	UAS:opto-tool	1	5	no
bPAC-MT	UAS:opto-tool	1	6	no
bPAC-MT	UAS:opto-tool	2	1	yes
bPAC-MT	UAS:opto-tool	2	2	yes
bPAC-MT	UAS:opto-tool	2	3	yes
bPAC-MT	UAS:opto-tool	2	4	yes
bPAC-MT	UAS:opto-tool	2	5	yes
bPAC-MT	UAS:opto-tool	2	6	yes
bPAC-MT	UAS:opto-tool	3	1	yes
bPAC-MT	UAS:opto-tool	3	2	yes
bPAC-MT	UAS:opto-tool	3	3	yes
bPAC-MT	UAS:opto-tool	3	4	yes
bPAC-MT	UAS:opto-tool	3	5	yes
bPAC-MT	UAS:opto-tool	3	6	yes
bPAC-MT	UAS:opto-tool	4	1	yes
bPAC-MT	UAS:opto-tool	4	2	yes
bPAC-MT	UAS:opto-tool	4	3	no
bPAC-MT	UAS:opto-tool	4	4	yes
bPAC-MT	UAS:opto-tool	4	5	yes
bPAC-MT	UAS:opto-tool	4	6	no
bPAC-MT	UAS:opto-tool	5	1	yes
bPAC-MT	UAS:opto-tool	5	2	no
bPAC-MT	UAS:opto-tool	5	3	no
bPAC-MT	UAS:opto-tool	5	4	yes
bPAC-MT	UAS:opto-tool	5	5	no
bPAC-MT	UAS:opto-tool	5	6	no
bPAC-MT	UAS:opto-tool	6	1	not included
bPAC-MT	UAS:opto-tool	6	2	not included
bPAC-MT	UAS:opto-tool	6	3	yes
bPAC-MT	UAS:opto-tool	6	4	no
bPAC-MT	UAS:opto-tool	6	5	no
bPAC-MT	UAS:opto-tool	6	6	no
bPAC-MT	UAS:opto-tool	7	1	yes
bPAC-MT	UAS:opto-tool	7	2	yes
bPAC-MT	UAS:opto-tool	7	3	no
bPAC-MT	UAS:opto-tool	7	4	no
bPAC-MT	UAS:opto-tool	7	5	yes
bPAC-MT	UAS:opto-tool	7	6	not included
bPAC-MT	UAS:opto-tool	8	1	no
bPAC-MT	UAS:opto-tool	8	2	yes
bPAC-MT	UAS:opto-tool	8	3	yes
bPAC-MT	UAS:opto-tool	8	4	yes
bPAC-MT	UAS:opto-tool	8	5	no
bPAC-MT	UAS:opto-tool	8	6	no
bPAC-MT	control	1	1	no
bPAC-MT	control	1	2	yes
bPAC-MT	control	1	3	yes
bPAC-MT	control	1	4	no
bPAC-MT	control	1	5	no
bPAC-MT	control	1	6	no
bPAC-MT	control	2	1	no
bPAC-MT	control	2	2	yes
bPAC-MT	control	2	3	yes
bPAC-MT	control	2	4	no
bPAC-MT	control	2	5	no
bPAC-MT	control	2	6	no
bPAC-MT	control	3	1	no
bPAC-MT	control	3	2	no
bPAC-MT	control	3	3	no
bPAC-MT	control	3	4	no
bPAC-MT	control	3	5	no
bPAC-MT	control	3	6	no
bPAC-MT	control	4	1	no
bPAC-MT	control	4	2	no
bPAC-MT	control	4	3	no
bPAC-MT	control	4	4	no
bPAC-MT	control	4	5	no
bPAC-MT	control	4	6	no
bPAC-MT	control	5	1	not included
bPAC-MT	control	5	2	no
bPAC-MT	control	5	3	no
bPAC-MT	control	5	4	yes
bPAC-MT	control	5	5	yes
bPAC-MT	control	5	6	yes
bPAC-MT	control	6	1	no
bPAC-MT	control	6	2	no
bPAC-MT	control	6	3	no
bPAC-MT	control	6	4	yes
bPAC-MT	control	6	5	yes
bPAC-MT	control	6	6	no
bPAC-MT	control	7	1	no
bPAC-MT	control	7	2	yes
bPAC-MT	control	7	3	yes
bPAC-MT	control	7	4	no
bPAC-MT	control	7	5	yes
bPAC-MT	control	7	6	no
bPAC-MT	control	8	1	no
bPAC-MT	control	8	2	no
bPAC-MT	control	8	3	no
bPAC-MT	control	8	4	no
bPAC-MT	control	8	5	no
bPAC-MT	control	8	6	no
OaPAC-Flag	Tg(UAS:opto-tool)	1	1	yes
OaPAC-Flag	Tg(UAS:opto-tool)	1	2	yes
OaPAC-Flag	Tg(UAS:opto-tool)	1	3	yes
OaPAC-Flag	Tg(UAS:opto-tool)	1	4	yes
OaPAC-Flag	Tg(UAS:opto-tool)	1	5	yes
OaPAC-Flag	Tg(UAS:opto-tool)	1	6	yes
OaPAC-Flag	Tg(UAS:opto-tool)	2	1	yes
OaPAC-Flag	Tg(UAS:opto-tool)	2	2	no
OaPAC-Flag	Tg(UAS:opto-tool)	2	3	no
OaPAC-Flag	Tg(UAS:opto-tool)	2	4	no
OaPAC-Flag	Tg(UAS:opto-tool)	2	5	no
OaPAC-Flag	Tg(UAS:opto-tool)	2	6	yes
OaPAC-Flag	Tg(UAS:opto-tool)	3	1	no
OaPAC-Flag	Tg(UAS:opto-tool)	3	2	no
OaPAC-Flag	Tg(UAS:opto-tool)	3	3	no
OaPAC-Flag	Tg(UAS:opto-tool)	3	4	no
OaPAC-Flag	Tg(UAS:opto-tool)	3	5	no
OaPAC-Flag	Tg(UAS:opto-tool)	3	6	no
OaPAC-Flag	Tg(UAS:opto-tool)	4	1	no
OaPAC-Flag	Tg(UAS:opto-tool)	4	2	no
OaPAC-Flag	Tg(UAS:opto-tool)	4	3	yes
OaPAC-Flag	Tg(UAS:opto-tool)	4	4	no
OaPAC-Flag	Tg(UAS:opto-tool)	4	5	yes
OaPAC-Flag	Tg(UAS:opto-tool)	4	6	no
OaPAC-Flag	Tg(UAS:opto-tool)	5	1	yes
OaPAC-Flag	Tg(UAS:opto-tool)	5	2	yes
OaPAC-Flag	Tg(UAS:opto-tool)	5	3	yes
OaPAC-Flag	Tg(UAS:opto-tool)	5	4	yes
OaPAC-Flag	Tg(UAS:opto-tool)	5	5	yes
OaPAC-Flag	Tg(UAS:opto-tool)	5	6	yes
OaPAC-Flag	Tg(UAS:opto-tool)	6	1	yes
OaPAC-Flag	Tg(UAS:opto-tool)	6	2	no
OaPAC-Flag	Tg(UAS:opto-tool)	6	3	no
OaPAC-Flag	Tg(UAS:opto-tool)	6	4	no
OaPAC-Flag	Tg(UAS:opto-tool)	6	5	yes
OaPAC-Flag	Tg(UAS:opto-tool)	6	6	no
OaPAC-Flag	Tg(UAS:opto-tool)	7	1	no
OaPAC-Flag	Tg(UAS:opto-tool)	7	2	no
OaPAC-Flag	Tg(UAS:opto-tool)	7	3	no
OaPAC-Flag	Tg(UAS:opto-tool)	7	4	no
OaPAC-Flag	Tg(UAS:opto-tool)	7	5	no
OaPAC-Flag	Tg(UAS:opto-tool)	7	6	no
OaPAC-Flag	Tg(UAS:opto-tool)	8	1	no
OaPAC-Flag	Tg(UAS:opto-tool)	8	2	not included
OaPAC-Flag	Tg(UAS:opto-tool)	8	3	no
OaPAC-Flag	Tg(UAS:opto-tool)	8	4	no
OaPAC-Flag	Tg(UAS:opto-tool)	8	5	yes
OaPAC-Flag	Tg(UAS:opto-tool)	8	6	yes
OaPAC-Flag	Tg(UAS:opto-tool)	1	1	no
OaPAC-Flag	Tg(UAS:opto-tool)	1	2	no
OaPAC-Flag	Tg(UAS:opto-tool)	1	3	yes
OaPAC-Flag	Tg(UAS:opto-tool)	1	4	no
OaPAC-Flag	Tg(UAS:opto-tool)	1	5	no
OaPAC-Flag	Tg(UAS:opto-tool)	1	6	no
OaPAC-Flag	Tg(UAS:opto-tool)	2	1	no
OaPAC-Flag	Tg(UAS:opto-tool)	2	2	no
OaPAC-Flag	Tg(UAS:opto-tool)	2	3	no
OaPAC-Flag	Tg(UAS:opto-tool)	2	4	no
OaPAC-Flag	Tg(UAS:opto-tool)	2	5	no
OaPAC-Flag	Tg(UAS:opto-tool)	2	6	no
OaPAC-Flag	Tg(UAS:opto-tool)	3	1	no
OaPAC-Flag	Tg(UAS:opto-tool)	3	2	no
OaPAC-Flag	Tg(UAS:opto-tool)	3	3	yes
OaPAC-Flag	Tg(UAS:opto-tool)	3	4	no
OaPAC-Flag	Tg(UAS:opto-tool)	3	5	no
OaPAC-Flag	Tg(UAS:opto-tool)	3	6	no
OaPAC-Flag	Tg(UAS:opto-tool)	4	1	no
OaPAC-Flag	Tg(UAS:opto-tool)	4	2	no
OaPAC-Flag	Tg(UAS:opto-tool)	4	3	no
OaPAC-Flag	Tg(UAS:opto-tool)	4	4	no
OaPAC-Flag	Tg(UAS:opto-tool)	4	5	no
OaPAC-Flag	Tg(UAS:opto-tool)	4	6	no
OaPAC-Flag	Tg(UAS:opto-tool)	5	1	no
OaPAC-Flag	Tg(UAS:opto-tool)	5	2	no
OaPAC-Flag	Tg(UAS:opto-tool)	5	3	no
OaPAC-Flag	Tg(UAS:opto-tool)	5	4	no
OaPAC-Flag	Tg(UAS:opto-tool)	5	5	no
OaPAC-Flag	Tg(UAS:opto-tool)	5	6	no
OaPAC-Flag	Tg(UAS:opto-tool)	6	1	yes
OaPAC-Flag	Tg(UAS:opto-tool)	6	2	no
OaPAC-Flag	Tg(UAS:opto-tool)	6	3	yes
OaPAC-Flag	Tg(UAS:opto-tool)	6	4	no
OaPAC-Flag	Tg(UAS:opto-tool)	6	5	no
OaPAC-Flag	Tg(UAS:opto-tool)	6	6	no
OaPAC-Flag	Tg(UAS:opto-tool)	7	1	no
OaPAC-Flag	Tg(UAS:opto-tool)	7	2	no
OaPAC-Flag	Tg(UAS:opto-tool)	7	3	no
OaPAC-Flag	Tg(UAS:opto-tool)	7	4	yes
OaPAC-Flag	Tg(UAS:opto-tool)	7	5	yes
OaPAC-Flag	Tg(UAS:opto-tool)	7	6	not included
OaPAC-Flag	Tg(UAS:opto-tool)	8	1	no
OaPAC-Flag	Tg(UAS:opto-tool)	8	2	yes
OaPAC-Flag	Tg(UAS:opto-tool)	8	3	no
OaPAC-Flag	Tg(UAS:opto-tool)	8	4	no
OaPAC-Flag	Tg(UAS:opto-tool)	8	5	no
OaPAC-Flag	Tg(UAS:opto-tool)	8	6	no

## Sheet: D
Line	sample number	trial number	latency
bPAC-MT	1	2	1.818
bPAC-MT	1	3	0.994
bPAC-MT	1	4	0.949
bPAC-MT	2	1	2.193
bPAC-MT	2	2	1.803
bPAC-MT	2	3	3.526
bPAC-MT	2	4	4.665
bPAC-MT	2	5	2.415
bPAC-MT	2	6	2.162
bPAC-MT	3	1	4.41
bPAC-MT	3	2	3.976
bPAC-MT	3	3	1.279
bPAC-MT	3	4	1.467
bPAC-MT	3	5	2.491
bPAC-MT	3	6	0.904
bPAC-MT	4	1	3.946
bPAC-MT	4	2	3.077
bPAC-MT	4	4	4.051
bPAC-MT	4	5	6.568
bPAC-MT	5	1	1.893
bPAC-MT	5	4	3.062
bPAC-MT	6	3	1.683
bPAC-MT	7	1	1.983
bPAC-MT	7	2	0.02
bPAC-MT	7	5	3.18
bPAC-MT	8	2	4.081
bPAC-MT	8	3	1.159
bPAC-MT	8	4	6.793
OaPAC-Flag	1	1	2.672
OaPAC-Flag	1	2	2.447
OaPAC-Flag	1	3	2.238
OaPAC-Flag	1	4	1.968
OaPAC-Flag	1	5	2.957
OaPAC-Flag	1	6	3.916
OaPAC-Flag	2	1	3.646
OaPAC-Flag	2	6	4.096
OaPAC-Flag	4	3	5.222
OaPAC-Flag	4	5	2.959
OaPAC-Flag	5	1	2.7
OaPAC-Flag	5	2	2.63
OaPAC-Flag	5	3	3.56
OaPAC-Flag	5	4	4.2
OaPAC-Flag	5	5	3.36
OaPAC-Flag	5	6	0.38
OaPAC-Flag	6	1	6.15
OaPAC-Flag	6	5	7.14
OaPAC-Flag	8	5	7.483
OaPAC-Flag	8	6	0.32

## Sheet: E
Line	sample number	trial number	duration
bPAC-MT	1	2	4.825
bPAC-MT	1	3	3.896
bPAC-MT	1	4	2.937
bPAC-MT	2	1	0.569
bPAC-MT	2	2	0.659
bPAC-MT	2	3	0.854
bPAC-MT	2	4	0.524
bPAC-MT	2	5	0.869
bPAC-MT	2	6	1.049
bPAC-MT	3	1	0.54
bPAC-MT	3	2	0.719
bPAC-MT	3	3	3.865
bPAC-MT	3	4	0.771
bPAC-MT	3	5	0.719
bPAC-MT	3	6	1.109
bPAC-MT	4	1	1.378
bPAC-MT	4	2	0.914
bPAC-MT	4	4	1.258
bPAC-MT	4	5	1.124
bPAC-MT	5	1	1.183
bPAC-MT	5	4	3.776
bPAC-MT	6	3	0.914
bPAC-MT	7	1	0.854
bPAC-MT	7	2	0.839
bPAC-MT	7	5	1.393
bPAC-MT	8	2	5.754
bPAC-MT	8	3	4.481
bPAC-MT	8	4	3.761
OaPAC-Flag	1	1	2.922
OaPAC-Flag	1	2	1.828
OaPAC-Flag	1	3	1.798
OaPAC-Flag	1	4	2.008
OaPAC-Flag	1	5	0.39
OaPAC-Flag	1	6	1.888
OaPAC-Flag	2	1	0.911
OaPAC-Flag	2	6	2.218
OaPAC-Flag	4	3	0.929
OaPAC-Flag	4	5	0.959
OaPAC-Flag	5	1	5.9
OaPAC-Flag	5	2	7.07
OaPAC-Flag	5	3	5.24
OaPAC-Flag	5	4	5.62
OaPAC-Flag	5	5	1.19
OaPAC-Flag	5	6	7.52
OaPAC-Flag	6	1	1.05
OaPAC-Flag	6	5	0.52
OaPAC-Flag	8	5	7.177
OaPAC-Flag	8	6	5.697

## Sheet: F
Line	sample number	trial number	strength
bPAC-MT	1	2	0.950458
bPAC-MT	1	3	0.994134
bPAC-MT	1	4	0.957691
bPAC-MT	2	1	0.913818
bPAC-MT	2	2	0.674187
bPAC-MT	2	3	0.775461
bPAC-MT	2	4	0.938475
bPAC-MT	2	5	0.932246
bPAC-MT	2	6	0.659076
bPAC-MT	3	1	0.522051
bPAC-MT	3	2	0.634472
bPAC-MT	3	3	0.746862
bPAC-MT	3	4	0.710626
bPAC-MT	3	5	0.61721
bPAC-MT	3	6	0.616271
bPAC-MT	4	1	0.781985
bPAC-MT	4	2	0.739903
bPAC-MT	4	4	1.01454
bPAC-MT	4	5	0.864996
bPAC-MT	5	1	0.231362
bPAC-MT	5	4	1.0403
bPAC-MT	6	3	0.0488678
bPAC-MT	7	1	0.0433641
bPAC-MT	7	2	0.791367
bPAC-MT	7	5	0.156212
bPAC-MT	8	2	0.97479
bPAC-MT	8	3	1.08027
bPAC-MT	8	4	0.916352
OaPAC-Flag	1	1	1.14686
OaPAC-Flag	1	2	1.19394
OaPAC-Flag	1	3	0.567894
OaPAC-Flag	1	4	0.517122
OaPAC-Flag	1	5	1.11653
OaPAC-Flag	1	6	0.566672
OaPAC-Flag	2	1	0.271272
OaPAC-Flag	2	6	0.356068
OaPAC-Flag	4	3	1.04547
OaPAC-Flag	4	5	1.07137
OaPAC-Flag	5	1	0.552174
OaPAC-Flag	5	2	0.567452
OaPAC-Flag	5	3	0.634989
OaPAC-Flag	5	4	0.574786
OaPAC-Flag	5	5	1.0621
OaPAC-Flag	5	6	0.548387
OaPAC-Flag	6	1	0.267462
OaPAC-Flag	6	5	0.941154
OaPAC-Flag	8	5	0.661546
OaPAC-Flag	8	6	0.824327

## Sheet: G
time point	bPAC-MT or control	sample number	trial number	ΔF/F
0	bPAC-MT	1	1	0
0.15	bPAC-MT	1	1	-0.194019
0.3	bPAC-MT	1	1	-0.287846
0.45	bPAC-MT	1	1	-0.331273
0.6	bPAC-MT	1	1	-0.364393
0.75	bPAC-MT	1	1	-0.386926
0.9	bPAC-MT	1	1	-0.40158
1.05	bPAC-MT	1	1	-0.413575
1.2	bPAC-MT	1	1	-0.422435
1.35	bPAC-MT	1	1	-0.431728
1.5	bPAC-MT	1	1	-0.43486
1.65	bPAC-MT	1	1	-0.440859
1.8	bPAC-MT	1	1	-0.448266
1.95	bPAC-MT	1	1	-0.450586
2.1	bPAC-MT	1	1	-0.453377
0	bPAC-MT	1	2	0
0.15	bPAC-MT	1	2	-0.275562
0.3	bPAC-MT	1	2	-0.405239
0.45	bPAC-MT	1	2	-0.456836
0.6	bPAC-MT	1	2	-0.485418
0.75	bPAC-MT	1	2	-0.507472
0.9	bPAC-MT	1	2	-0.521735
1.05	bPAC-MT	1	2	-0.5329
1.2	bPAC-MT	1	2	-0.541393
1.35	bPAC-MT	1	2	-0.547424
1.5	bPAC-MT	1	2	-0.552911
1.65	bPAC-MT	1	2	-0.557401
1.8	bPAC-MT	1	2	-0.561569
1.95	bPAC-MT	1	2	-0.565153
2.1	bPAC-MT	1	2	-0.568695
0	bPAC-MT	1	3	0
0.15	bPAC-MT	1	3	-0.23979
0.3	bPAC-MT	1	3	-0.3383
0.45	bPAC-MT	1	3	-0.384752
0.6	bPAC-MT	1	3	-0.412711
0.75	bPAC-MT	1	3	-0.432589
0.9	bPAC-MT	1	3	-0.446828
1.05	bPAC-MT	1	3	-0.458089
1.2	bPAC-MT	1	3	-0.467412
1.35	bPAC-MT	1	3	-0.474669
1.5	bPAC-MT	1	3	-0.480548
1.65	bPAC-MT	1	3	-0.485546
1.8	bPAC-MT	1	3	-0.490005
1.95	bPAC-MT	1	3	-0.493551
2.1	bPAC-MT	1	3	-0.496221
0	bPAC-MT	2	1	0
0.15	bPAC-MT	2	1	-0.142242
0.3	bPAC-MT	2	1	-0.199016
0.45	bPAC-MT	2	1	-0.227919
0.6	bPAC-MT	2	1	-0.24591
0.75	bPAC-MT	2	1	-0.258031
0.9	bPAC-MT	2	1	-0.26777
1.05	bPAC-MT	2	1	-0.276194
1.2	bPAC-MT	2	1	-0.283632
1.35	bPAC-MT	2	1	-0.287943
1.5	bPAC-MT	2	1	-0.29323
1.65	bPAC-MT	2	1	-0.297054
1.8	bPAC-MT	2	1	-0.300293
1.95	bPAC-MT	2	1	-0.303599
2.1	bPAC-MT	2	1	-0.305624
0	bPAC-MT	2	2	0
0.15	bPAC-MT	2	2	-0.194823
0.3	bPAC-MT	2	2	-0.259235
0.45	bPAC-MT	2	2	-0.289996
0.6	bPAC-MT	2	2	-0.312173
0.75	bPAC-MT	2	2	-0.326273
0.9	bPAC-MT	2	2	-0.337548
1.05	bPAC-MT	2	2	-0.343854
1.2	bPAC-MT	2	2	-0.353192
1.35	bPAC-MT	2	2	-0.358525
1.5	bPAC-MT	2	2	-0.362436
1.65	bPAC-MT	2	2	-0.367937
1.8	bPAC-MT	2	2	-0.37189
1.95	bPAC-MT	2	2	-0.374798
2.1	bPAC-MT	2	2	-0.374808
0	bPAC-MT	2	3	0
0.15	bPAC-MT	2	3	-0.212307
0.3	bPAC-MT	2	3	-0.317865
0.45	bPAC-MT	2	3	-0.357896
0.6	bPAC-MT	2	3	-0.379752
0.75	bPAC-MT	2	3	-0.394586
0.9	bPAC-MT	2	3	-0.404311
1.05	bPAC-MT	2	3	-0.41505
1.2	bPAC-MT	2	3	-0.423179
1.35	bPAC-MT	2	3	-0.428994
1.5	bPAC-MT	2	3	-0.432876
1.65	bPAC-MT	2	3	-0.436762
1.8	bPAC-MT	2	3	-0.439545
1.95	bPAC-MT	2	3	-0.441826
2.1	bPAC-MT	2	3	-0.4442
0	control	1	1	0
0.15	control	1	1	-0.0522851
0.3	control	1	1	-0.095504
0.45	control	1	1	-0.132149
0.6	control	1	1	-0.162363
0.75	control	1	1	-0.187813
0.9	control	1	1	-0.209822
1.05	control	1	1	-0.228275
1.2	control	1	1	-0.243422
1.35	control	1	1	-0.256007
1.5	control	1	1	-0.267228
1.65	control	1	1	-0.277157
1.8	control	1	1	-0.285872
1.95	control	1	1	-0.293815
2.1	control	1	1	-0.300428
0	control	1	2	0
0.15	control	1	2	-0.0508566
0.3	control	1	2	-0.0927025
0.45	control	1	2	-0.124628
0.6	control	1	2	-0.157163
0.75	control	1	2	-0.181399
0.9	control	1	2	-0.201273
1.05	control	1	2	-0.21895
1.2	control	1	2	-0.232094
1.35	control	1	2	-0.243587
1.5	control	1	2	-0.25427
1.65	control	1	2	-0.263785
1.8	control	1	2	-0.271187
1.95	control	1	2	-0.278859
2.1	control	1	2	-0.284486
0	control	1	3	0
0.15	control	1	3	-0.0504882
0.3	control	1	3	-0.0919625
0.45	control	1	3	-0.128858
0.6	control	1	3	-0.15975
0.75	control	1	3	-0.182205
0.9	control	1	3	-0.203278
1.05	control	1	3	-0.221775
1.2	control	1	3	-0.236843
1.35	control	1	3	-0.250215
1.5	control	1	3	-0.259891
1.65	control	1	3	-0.270703
1.8	control	1	3	-0.279925
1.95	control	1	3	-0.285447
2.1	control	1	3	-0.289663
0	control	2	1	0
0.15	control	2	1	-0.0414715
0.3	control	2	1	-0.0907972
0.45	control	2	1	-0.129917
0.6	control	2	1	-0.163804
0.75	control	2	1	-0.192218
0.9	control	2	1	-0.215467
1.05	control	2	1	-0.236121
1.2	control	2	1	-0.254486
1.35	control	2	1	-0.268825
1.5	control	2	1	-0.28131
1.65	control	2	1	-0.294145
1.8	control	2	1	-0.305556
1.95	control	2	1	-0.31441
2.1	control	2	1	-0.321069
0	control	2	2	0
0.15	control	2	2	-0.053388
0.3	control	2	2	-0.0962382
0.45	control	2	2	-0.13064
0.6	control	2	2	-0.161035
0.75	control	2	2	-0.186167
0.9	control	2	2	-0.207116
1.05	control	2	2	-0.224799
1.2	control	2	2	-0.239664
1.35	control	2	2	-0.252882
1.5	control	2	2	-0.264432
1.65	control	2	2	-0.274057
1.8	control	2	2	-0.282207
1.95	control	2	2	-0.288849
2.1	control	2	2	-0.294334
0	control	2	3	0
0.15	control	2	3	-0.052461
0.3	control	2	3	-0.0935247
0.45	control	2	3	-0.130029
0.6	control	2	3	-0.16023
0.75	control	2	3	-0.185613
0.9	control	2	3	-0.207178
1.05	control	2	3	-0.224271
1.2	control	2	3	-0.23904
1.35	control	2	3	-0.249847
1.5	control	2	3	-0.260664
1.65	control	2	3	-0.272961
1.8	control	2	3	-0.282084
1.95	control	2	3	-0.287266
2.1	control	2	3	-0.29273

## Sheet: H
time point	OaPAC-Flag or control	sample number	trial number	ΔF/F
0	OaPAC-Flag	1	1	0
0.15	OaPAC-Flag	1	1	-0.113983
0.3	OaPAC-Flag	1	1	-0.201619
0.45	OaPAC-Flag	1	1	-0.266402
0.6	OaPAC-Flag	1	1	-0.315715
0.75	OaPAC-Flag	1	1	-0.353814
0.9	OaPAC-Flag	1	1	-0.383983
1.05	OaPAC-Flag	1	1	-0.409774
1.2	OaPAC-Flag	1	1	-0.42986
1.35	OaPAC-Flag	1	1	-0.442185
1.5	OaPAC-Flag	1	1	-0.456401
1.65	OaPAC-Flag	1	1	-0.46845
1.8	OaPAC-Flag	1	1	-0.479257
1.95	OaPAC-Flag	1	1	-0.487746
2.1	OaPAC-Flag	1	1	-0.495516
0	OaPAC-Flag	1	2	0
0.15	OaPAC-Flag	1	2	-0.104305
0.3	OaPAC-Flag	1	2	-0.181946
0.45	OaPAC-Flag	1	2	-0.24003
0.6	OaPAC-Flag	1	2	-0.283132
0.75	OaPAC-Flag	1	2	-0.317792
0.9	OaPAC-Flag	1	2	-0.346051
1.05	OaPAC-Flag	1	2	-0.368504
1.2	OaPAC-Flag	1	2	-0.386964
1.35	OaPAC-Flag	1	2	-0.402587
1.5	OaPAC-Flag	1	2	-0.415203
1.65	OaPAC-Flag	1	2	-0.431874
1.8	OaPAC-Flag	1	2	-0.440448
1.95	OaPAC-Flag	1	2	-0.444932
2.1	OaPAC-Flag	1	2	-0.447919
0	OaPAC-Flag	1	3	0
0.15	OaPAC-Flag	1	3	-0.0996799
0.3	OaPAC-Flag	1	3	-0.17689
0.45	OaPAC-Flag	1	3	-0.234956
0.6	OaPAC-Flag	1	3	-0.281507
0.75	OaPAC-Flag	1	3	-0.318282
0.9	OaPAC-Flag	1	3	-0.348059
1.05	OaPAC-Flag	1	3	-0.372513
1.2	OaPAC-Flag	1	3	-0.393095
1.35	OaPAC-Flag	1	3	-0.410737
1.5	OaPAC-Flag	1	3	-0.424351
1.65	OaPAC-Flag	1	3	-0.435606
1.8	OaPAC-Flag	1	3	-0.446402
1.95	OaPAC-Flag	1	3	-0.456982
2.1	OaPAC-Flag	1	3	-0.464861
0	OaPAC-Flag	2	1	0
0.15	OaPAC-Flag	2	1	-0.102138
0.3	OaPAC-Flag	2	1	-0.187443
0.45	OaPAC-Flag	2	1	-0.252736
0.6	OaPAC-Flag	2	1	-0.302242
0.75	OaPAC-Flag	2	1	-0.343001
0.9	OaPAC-Flag	2	1	-0.375893
1.05	OaPAC-Flag	2	1	-0.40262
1.2	OaPAC-Flag	2	1	-0.423409
1.35	OaPAC-Flag	2	1	-0.441508
1.5	OaPAC-Flag	2	1	-0.457553
1.65	OaPAC-Flag	2	1	-0.470257
1.8	OaPAC-Flag	2	1	-0.481188
1.95	OaPAC-Flag	2	1	-0.491083
2.1	OaPAC-Flag	2	1	-0.498942
0	OaPAC-Flag	2	2	0
0.15	OaPAC-Flag	2	2	-0.0996704
0.3	OaPAC-Flag	2	2	-0.176657
0.45	OaPAC-Flag	2	2	-0.237225
0.6	OaPAC-Flag	2	2	-0.28192
0.75	OaPAC-Flag	2	2	-0.32113
0.9	OaPAC-Flag	2	2	-0.352229
1.05	OaPAC-Flag	2	2	-0.37666
1.2	OaPAC-Flag	2	2	-0.395601
1.35	OaPAC-Flag	2	2	-0.412666
1.5	OaPAC-Flag	2	2	-0.427171
1.65	OaPAC-Flag	2	2	-0.442882
1.8	OaPAC-Flag	2	2	-0.450441
1.95	OaPAC-Flag	2	2	-0.459053
2.1	OaPAC-Flag	2	2	-0.467432
0	OaPAC-Flag	2	3	0
0.15	OaPAC-Flag	2	3	-0.0975112
0.3	OaPAC-Flag	2	3	-0.17315
0.45	OaPAC-Flag	2	3	-0.230642
0.6	OaPAC-Flag	2	3	-0.27546
0.75	OaPAC-Flag	2	3	-0.3119
0.9	OaPAC-Flag	2	3	-0.34182
1.05	OaPAC-Flag	2	3	-0.365947
1.2	OaPAC-Flag	2	3	-0.385926
1.35	OaPAC-Flag	2	3	-0.404722
1.5	OaPAC-Flag	2	3	-0.417721
1.65	OaPAC-Flag	2	3	-0.428623
1.8	OaPAC-Flag	2	3	-0.435877
1.95	OaPAC-Flag	2	3	-0.444649
2.1	OaPAC-Flag	2	3	-0.451814
0	control	1	1	0
0.15	control	1	1	-0.0413358
0.3	control	1	1	-0.0939323
0.45	control	1	1	-0.13623
0.6	control	1	1	-0.171814
0.75	control	1	1	-0.200671
0.9	control	1	1	-0.224909
1.05	control	1	1	-0.245366
1.2	control	1	1	-0.261973
1.35	control	1	1	-0.276102
1.5	control	1	1	-0.288086
1.65	control	1	1	-0.29669
1.8	control	1	1	-0.304995
1.95	control	1	1	-0.312091
2.1	control	1	1	-0.317472
0	control	1	2	0
0.15	control	1	2	-0.062283
0.3	control	1	2	-0.111714
0.45	control	1	2	-0.152341
0.6	control	1	2	-0.18387
0.75	control	1	2	-0.211218
0.9	control	1	2	-0.233905
1.05	control	1	2	-0.25231
1.2	control	1	2	-0.267269
1.35	control	1	2	-0.280067
1.5	control	1	2	-0.289885
1.65	control	1	2	-0.299513
1.8	control	1	2	-0.307776
1.95	control	1	2	-0.314163
2.1	control	1	2	-0.319586
0	control	1	3	0
0.15	control	1	3	-0.0641648
0.3	control	1	3	-0.117296
0.45	control	1	3	-0.157838
0.6	control	1	3	-0.190475
0.75	control	1	3	-0.217945
0.9	control	1	3	-0.241113
1.05	control	1	3	-0.260515
1.2	control	1	3	-0.275165
1.35	control	1	3	-0.287453
1.5	control	1	3	-0.297063
1.65	control	1	3	-0.304919
1.8	control	1	3	-0.311609
1.95	control	1	3	-0.318026
2.1	control	1	3	-0.32319
0	control	2	1	0
0.15	control	2	1	-0.0689714
0.3	control	2	1	-0.123702
0.45	control	2	1	-0.165085
0.6	control	2	1	-0.199123
0.75	control	2	1	-0.227382
0.9	control	2	1	-0.250883
1.05	control	2	1	-0.270431
1.2	control	2	1	-0.283991
1.35	control	2	1	-0.299319
1.5	control	2	1	-0.308923
1.65	control	2	1	-0.316576
1.8	control	2	1	-0.325786
1.95	control	2	1	-0.331704
2.1	control	2	1	-0.338124
0	control	2	2	0
0.15	control	2	2	-0.0625537
0.3	control	2	2	-0.114297
0.45	control	2	2	-0.153787
0.6	control	2	2	-0.185621
0.75	control	2	2	-0.211352
0.9	control	2	2	-0.233824
1.05	control	2	2	-0.251871
1.2	control	2	2	-0.267741
1.35	control	2	2	-0.279737
1.5	control	2	2	-0.290102
1.65	control	2	2	-0.300528
1.8	control	2	2	-0.307707
1.95	control	2	2	-0.314711
2.1	control	2	2	-0.319973
0	control	2	3	0
0.15	control	2	3	-0.0605021
0.3	control	2	3	-0.10759
0.45	control	2	3	-0.144201
0.6	control	2	3	-0.174402
0.75	control	2	3	-0.200895
0.9	control	2	3	-0.221803
1.05	control	2	3	-0.240386
1.2	control	2	3	-0.254783
1.35	control	2	3	-0.268505
1.5	control	2	3	-0.279296
1.65	control	2	3	-0.289124
1.8	control	2	3	-0.297045
1.95	control	2	3	-0.307836
2.1	control	2	3	-0.31507
